# Supplementary material for: Unraveling the genetics of arsenic toxicity with cellular morphology QTL
Source: PLoS Genet. 2024 Apr 25;20(4):e1011248. doi: 10.1371/journal.pgen.1011248 (PMC11075906; doi:10.1371/journal.pgen.1011248)
Supplement: S1 Table — (CSV) [file pgen.1011248.s004.csv]

	lodindex	lodcolumn	chr	pos	lod	ci_lo	ci_hi	trait	feat	par	label	region	type	drm	drm_val	response	drm_out	trait_clean
1	1	pheno1	1	43.649532	7.212165398	43.15686	45.310196	c_nonborder_cell_3_area_mm2_mean_per_well	nonborder_cell_3_area_mm2_mean_per_well	c	MitoTracker	cell	size	asymptote	asymptote	maximum response	maximum response	maximum response cell MitoTracker size
2	1	pheno1	3	66.129589	7.188555656	65.604405	69.582498	c_nonborder_cell_3_roundness_mean_per_well	nonborder_cell_3_roundness_mean_per_well	c	MitoTracker	cell	shape	asymptote	asymptote	NA	baseline	baseline cell MitoTracker shape
3	1	pheno1	13	37.662508	8.886283815	37.325778	37.709715	c_nonborder_cell_mito_tracker_deep_red_ser_bright_1_5_px_mean_per_well	nonborder_cell_mito_tracker_deep_red_ser_bright_1_5_px_mean_per_well	c	MitoTracker	mitochondria	texture	asymptote	asymptote	maximum response	maximum response	maximum response mitochondria MitoTracker texture
4	1	pheno1	2	113.427506	6.307473418	109.898295	146.254368	c_nonborder_cell_mito_tracker_deep_red_ser_dark_1_5_px_mean_per_well	nonborder_cell_mito_tracker_deep_red_ser_dark_1_5_px_mean_per_well	c	MitoTracker	mitochondria	texture	asymptote	asymptote	NA	baseline	baseline mitochondria MitoTracker texture
5	1	pheno1	16	93.71225	7.005184331	88.754299	93.916186	c_nonborder_cell_mito_tracker_deep_red_ser_edge_1_5_px_mean_per_well	nonborder_cell_mito_tracker_deep_red_ser_edge_1_5_px_mean_per_well	c	MitoTracker	mitochondria	texture	asymptote	asymptote	NA	baseline	baseline mitochondria MitoTracker texture
6	1	pheno1	3	107.973822	6.369635642	107.627561	108.562897	c_nonborder_cell_mito_tracker_deep_red_ser_hole_1_5_px_mean_per_well	nonborder_cell_mito_tracker_deep_red_ser_hole_1_5_px_mean_per_well	c	MitoTracker	mitochondria	texture	asymptote	asymptote	maximum response	maximum response	maximum response mitochondria MitoTracker texture
7	1	pheno1	19	54.99388	6.154360229	54.404408	58.166293	c_nonborder_cell_mito_tracker_deep_red_ser_ridge_1_5_px_mean_per_well	nonborder_cell_mito_tracker_deep_red_ser_ridge_1_5_px_mean_per_well	c	MitoTracker	mitochondria	texture	asymptote	asymptote	maximum response	maximum response	maximum response mitochondria MitoTracker texture
8	1	pheno1	13	37.604226	7.008664459	34.507143	38.31464	c_nonborder_cell_mito_tracker_deep_red_ser_saddle_1_5_px_mean_per_well	nonborder_cell_mito_tracker_deep_red_ser_saddle_1_5_px_mean_per_well	c	MitoTracker	mitochondria	texture	asymptote	asymptote	NA	baseline	baseline mitochondria MitoTracker texture
9	1	pheno1	4	36.372684	6.804778808	35.664745	36.749018	c_nonborder_cell_mito_tracker_deep_red_ser_spot_1_5_px_mean_per_well	nonborder_cell_mito_tracker_deep_red_ser_spot_1_5_px_mean_per_well	c	MitoTracker	mitochondria	texture	asymptote	asymptote	maximum response	maximum response	maximum response mitochondria MitoTracker texture
10	1	pheno1	16	93.71225	5.964966513	15.074652	93.916186	c_nonborder_cell_mito_tracker_deep_red_ser_valley_1_5_px_mean_per_well	nonborder_cell_mito_tracker_deep_red_ser_valley_1_5_px_mean_per_well	c	MitoTracker	mitochondria	texture	asymptote	asymptote	NA	baseline	baseline mitochondria MitoTracker texture
11	1	pheno1	12	109.165141	7.922423294	108.142877	109.669861	c_nonborder_cell_nearest_neighbor_distance_mm_mean_per_well	nonborder_cell_nearest_neighbor_distance_mm_mean_per_well	c	MitoTracker	cell	size	asymptote	asymptote	NA	baseline	baseline cell MitoTracker size
12	1	pheno1	1	12.518475	6.510109693	6.467181	25.284899	c_nonborder_intensity_cytoplasm_3_mito_tracker_deep_red_contrast_mean_per_well	nonborder_intensity_cytoplasm_3_mito_tracker_deep_red_contrast_mean_per_well	c	MitoTracker	mitochondria	intensity	asymptote	asymptote	maximum response	maximum response	maximum response mitochondria MitoTracker intensity
13	1	pheno1	1	22.674042	6.095430076	22.1046	61.69548	c_nonborder_intensity_cytoplasm_3_mito_tracker_deep_red_mean_mean_per_well	nonborder_intensity_cytoplasm_3_mito_tracker_deep_red_mean_mean_per_well	c	MitoTracker	mitochondria	intensity	asymptote	asymptote	NA	baseline	baseline mitochondria MitoTracker intensity
14	1	pheno1	12	92.58076	7.34858982	92.201588	94.788542	c_nonborder_intensity_cytoplasm_3_mito_tracker_deep_red_median_mean_per_well	nonborder_intensity_cytoplasm_3_mito_tracker_deep_red_median_mean_per_well	c	MitoTracker	mitochondria	intensity	asymptote	asymptote	NA	baseline	baseline mitochondria MitoTracker intensity
15	1	pheno1	5	70.421907	5.758359241	27.831218	127.209795	c_nonborder_intensity_hoechst_area_contrast_mean_per_well	nonborder_intensity_hoechst_area_contrast_mean_per_well	c	Hoechst	nucleus	intensity	asymptote	asymptote	NA	baseline	baseline nucleus Hoechst intensity
16	1	pheno1	13	93.341657	6.196479393	92.851386	94.476908	c_nonborder_intensity_hoechst_area_mean_mean_per_well	nonborder_intensity_hoechst_area_mean_mean_per_well	c	Hoechst	nucleus	intensity	asymptote	asymptote	NA	baseline	baseline nucleus Hoechst intensity
17	1	pheno1	13	93.324072	6.271774746	89.101737	94.531711	c_nonborder_intensity_hoechst_area_median_mean_per_well	nonborder_intensity_hoechst_area_median_mean_per_well	c	Hoechst	nucleus	intensity	asymptote	asymptote	NA	baseline	baseline nucleus Hoechst intensity
18	1	pheno1	5	70.758491	5.940732434	27.981404	139.240543	c_nonborder_intensity_hoechst_ring_contrast_mean_per_well	nonborder_intensity_hoechst_ring_contrast_mean_per_well	c	Hoechst	nucleus	intensity	asymptote	asymptote	NA	baseline	baseline nucleus Hoechst intensity
19	1	pheno1	12	106.998345	6.263383811	4.026321	107.888737	c_nonborder_intensity_hoechst_ring_mean_mean_per_well	nonborder_intensity_hoechst_ring_mean_mean_per_well	c	Hoechst	nucleus	intensity	asymptote	asymptote	NA	baseline	baseline nucleus Hoechst intensity
20	1	pheno1	18	12.191943	6.016620928	9.505126	55.349186	c_nonborder_intensity_hoechst_ring_median_mean_per_well	nonborder_intensity_hoechst_ring_median_mean_per_well	c	Hoechst	nucleus	intensity	asymptote	asymptote	NA	baseline	baseline nucleus Hoechst intensity
21	1	pheno1	7	16.399267	7.170710087	3.13882	16.604812	c_nonborder_intensity_mitoringregion_mito_tracker_deep_red_contrast_mean_per_well	nonborder_intensity_mitoringregion_mito_tracker_deep_red_contrast_mean_per_well	c	MitoTracker	mitochondria	intensity	asymptote	asymptote	maximum response	maximum response	maximum response mitochondria MitoTracker intensity
22	1	pheno1	13	42.175449	6.494506146	41.410039	42.73944	c_nonborder_intensity_mitoringregion_mito_tracker_deep_red_mean_mean_per_well	nonborder_intensity_mitoringregion_mito_tracker_deep_red_mean_mean_per_well	c	MitoTracker	mitochondria	intensity	asymptote	asymptote	maximum response	maximum response	maximum response mitochondria MitoTracker intensity
23	1	pheno1	19	57.064353	6.461533356	56.182814	57.981049	c_nonborder_intensity_mitoringregion_mito_tracker_deep_red_median_mean_per_well	nonborder_intensity_mitoringregion_mito_tracker_deep_red_median_mean_per_well	c	MitoTracker	mitochondria	intensity	asymptote	asymptote	maximum response	maximum response	maximum response mitochondria MitoTracker intensity
24	1	pheno1	19	14.827495	6.905549572	14.22623	15.734445	c_nonborder_intensity_mitoringregion_mitosmooth_contrast_mean_per_well	nonborder_intensity_mitoringregion_mitosmooth_contrast_mean_per_well	c	MitoTracker	mitochondria	intensity	asymptote	asymptote	NA	baseline	baseline mitochondria MitoTracker intensity
25	1	pheno1	18	33.937251	5.713557774	31.759378	38.279962	c_nonborder_intensity_mitoringregion_mitosmooth_mean_mean_per_well	nonborder_intensity_mitoringregion_mitosmooth_mean_mean_per_well	c	MitoTracker	mitochondria	intensity	asymptote	asymptote	NA	baseline	baseline mitochondria MitoTracker intensity
26	1	pheno1	19	57.523109	6.533593634	26.543449	58.01465	c_nonborder_intensity_mitoringregion_mitosmooth_median_mean_per_well	nonborder_intensity_mitoringregion_mitosmooth_median_mean_per_well	c	MitoTracker	mitochondria	intensity	asymptote	asymptote	NA	baseline	baseline mitochondria MitoTracker intensity
27	1	pheno1	9	62.258768	6.845338721	62.163359	62.329506	c_nonborder_intensity_nucleus_hoechst_33342_contrast_mean_per_well	nonborder_intensity_nucleus_hoechst_33342_contrast_mean_per_well	c	Hoechst	nucleus	intensity	asymptote	asymptote	NA	baseline	baseline nucleus Hoechst intensity
28	1	pheno1	12	5.21791	5.496160549	3.0327	107.809299	c_nonborder_intensity_nucleus_hoechst_33342_mean_mean_per_well	nonborder_intensity_nucleus_hoechst_33342_mean_mean_per_well	c	Hoechst	nucleus	intensity	asymptote	asymptote	NA	baseline	baseline nucleus Hoechst intensity
29	1	pheno1	18	55.085738	5.808252862	9.492519	55.407352	c_nonborder_intensity_nucleus_hoechst_33342_median_mean_per_well	nonborder_intensity_nucleus_hoechst_33342_median_mean_per_well	c	Hoechst	nucleus	intensity	asymptote	asymptote	NA	baseline	baseline nucleus Hoechst intensity
30	1	pheno1	5	72.71081	6.934471796	19.880018	73.904143	c_nonborder_mitosmooth_area_mm2_mean_per_well	nonborder_mitosmooth_area_mm2_mean_per_well	c	MitoTracker	cell	size	asymptote	asymptote	maximum response	maximum response	maximum response cell MitoTracker size
31	1	pheno1	12	86.681898	6.694325418	84.59564	88.989875	c_nonborder_mitosmooth_axial_length_ratio_mean_per_well	nonborder_mitosmooth_axial_length_ratio_mean_per_well	c	MitoTracker	cell	distribution	asymptote	asymptote	NA	baseline	baseline cell MitoTracker distribution
32	1	pheno1	1	25.641993	7.36052101	23.05396	38.366118	c_nonborder_mitosmooth_axial_length_ratio_ser_bright_mean_per_well	nonborder_mitosmooth_axial_length_ratio_ser_bright_mean_per_well	c	MitoTracker	cell	distribution	asymptote	asymptote	NA	baseline	baseline cell MitoTracker distribution
33	1	pheno1	2	148.578178	6.499216492	148.196578	149.613724	c_nonborder_mitosmooth_axial_length_ratio_ser_dark_mean_per_well	nonborder_mitosmooth_axial_length_ratio_ser_dark_mean_per_well	c	MitoTracker	cell	distribution	asymptote	asymptote	NA	baseline	baseline cell MitoTracker distribution
34	1	pheno1	12	86.915802	6.297254403	86.181126	88.927412	c_nonborder_mitosmooth_axial_length_ratio_ser_edge_mean_per_well	nonborder_mitosmooth_axial_length_ratio_ser_edge_mean_per_well	c	MitoTracker	cell	distribution	asymptote	asymptote	NA	baseline	baseline cell MitoTracker distribution
35	1	pheno1	12	86.681898	7.584750899	86.209895	88.852587	c_nonborder_mitosmooth_axial_length_ratio_ser_hole_mean_per_well	nonborder_mitosmooth_axial_length_ratio_ser_hole_mean_per_well	c	MitoTracker	cell	distribution	asymptote	asymptote	NA	baseline	baseline cell MitoTracker distribution
36	1	pheno1	1	25.641993	7.555306652	25.066953	37.67063	c_nonborder_mitosmooth_axial_length_ratio_ser_ridge_mean_per_well	nonborder_mitosmooth_axial_length_ratio_ser_ridge_mean_per_well	c	MitoTracker	cell	distribution	asymptote	asymptote	NA	baseline	baseline cell MitoTracker distribution
37	1	pheno1	12	88.245955	6.36582868	84.66256	88.931471	c_nonborder_mitosmooth_axial_length_ratio_ser_saddle_mean_per_well	nonborder_mitosmooth_axial_length_ratio_ser_saddle_mean_per_well	c	MitoTracker	cell	distribution	asymptote	asymptote	NA	baseline	baseline cell MitoTracker distribution
38	1	pheno1	14	75.63818	7.520203144	74.871442	77.727757	c_nonborder_mitosmooth_axial_length_ratio_ser_spot_mean_per_well	nonborder_mitosmooth_axial_length_ratio_ser_spot_mean_per_well	c	MitoTracker	cell	distribution	asymptote	asymptote	NA	baseline	baseline cell MitoTracker distribution
39	1	pheno1	2	148.452407	6.105603206	148.196578	149.876312	c_nonborder_mitosmooth_axial_length_ratio_ser_valley_mean_per_well	nonborder_mitosmooth_axial_length_ratio_ser_valley_mean_per_well	c	MitoTracker	cell	distribution	asymptote	asymptote	NA	baseline	baseline cell MitoTracker distribution
40	1	pheno1	17	32.312778	6.041946917	15.883797	34.997888	c_nonborder_mitosmooth_axial_small_length_mean_per_well	nonborder_mitosmooth_axial_small_length_mean_per_well	c	MitoTracker	cell	size	asymptote	asymptote	maximum response	maximum response	maximum response cell MitoTracker size
41	1	pheno1	1	153.907114	5.766501583	152.190106	154.322853	c_nonborder_mitosmooth_axial_small_length_ser_bright_mean_per_well	nonborder_mitosmooth_axial_small_length_ser_bright_mean_per_well	c	MitoTracker	cell	distribution	asymptote	asymptote	maximum response	maximum response	maximum response cell MitoTracker distribution
42	1	pheno1	3	119.664023	6.376712988	118.762903	119.806332	c_nonborder_mitosmooth_axial_small_length_ser_dark_mean_per_well	nonborder_mitosmooth_axial_small_length_ser_dark_mean_per_well	c	MitoTracker	cell	distribution	asymptote	asymptote	maximum response	maximum response	maximum response cell MitoTracker distribution
43	1	pheno1	8	119.460086	6.465642994	119.236722	119.988703	c_nonborder_mitosmooth_axial_small_length_ser_edge_mean_per_well	nonborder_mitosmooth_axial_small_length_ser_edge_mean_per_well	c	MitoTracker	cell	distribution	asymptote	asymptote	maximum response	maximum response	maximum response cell MitoTracker distribution
44	1	pheno1	9	99.546803	6.04852235	96.949677	100.32405	c_nonborder_mitosmooth_axial_small_length_ser_hole_mean_per_well	nonborder_mitosmooth_axial_small_length_ser_hole_mean_per_well	c	MitoTracker	cell	distribution	asymptote	asymptote	maximum response	maximum response	maximum response cell MitoTracker distribution
45	1	pheno1	14	92.443593	6.507490788	46.340371	99.606996	c_nonborder_mitosmooth_axial_small_length_ser_ridge_mean_per_well	nonborder_mitosmooth_axial_small_length_ser_ridge_mean_per_well	c	MitoTracker	cell	distribution	asymptote	asymptote	maximum response	maximum response	maximum response cell MitoTracker distribution
46	1	pheno1	9	116.476974	6.491550059	115.473655	116.842318	c_nonborder_mitosmooth_axial_small_length_ser_saddle_mean_per_well	nonborder_mitosmooth_axial_small_length_ser_saddle_mean_per_well	c	MitoTracker	cell	distribution	asymptote	asymptote	maximum response	maximum response	maximum response cell MitoTracker distribution
47	1	pheno1	8	119.460086	5.934948346	117.495252	119.970326	c_nonborder_mitosmooth_axial_small_length_ser_spot_mean_per_well	nonborder_mitosmooth_axial_small_length_ser_spot_mean_per_well	c	MitoTracker	cell	distribution	asymptote	asymptote	maximum response	maximum response	maximum response cell MitoTracker distribution
48	1	pheno1	3	119.64528	6.351479812	118.762903	119.806332	c_nonborder_mitosmooth_axial_small_length_ser_valley_mean_per_well	nonborder_mitosmooth_axial_small_length_ser_valley_mean_per_well	c	MitoTracker	cell	distribution	asymptote	asymptote	maximum response	maximum response	maximum response cell MitoTracker distribution
49	1	pheno1	5	73.329023	7.134901533	72.541803	73.904143	c_nonborder_mitosmooth_length_mm_mean_per_well	nonborder_mitosmooth_length_mm_mean_per_well	c	MitoTracker	cell	size	asymptote	asymptote	maximum response	maximum response	maximum response cell MitoTracker size
50	1	pheno1	9	105.54662	6.587460274	104.010442	105.69471	c_nonborder_mitosmooth_profile_1_2_mean_per_well	nonborder_mitosmooth_profile_1_2_mean_per_well	c	MitoTracker	cell	distribution	asymptote	asymptote	maximum response	maximum response	maximum response cell MitoTracker distribution
51	1	pheno1	13	36.959058	6.375732166	36.872854	37.709715	c_nonborder_mitosmooth_profile_1_2_ser_bright_mean_per_well	nonborder_mitosmooth_profile_1_2_ser_bright_mean_per_well	c	MitoTracker	cell	distribution	asymptote	asymptote	maximum response	maximum response	maximum response cell MitoTracker distribution
52	1	pheno1	6	98.105376	5.291886938	40.181683	103.530621	c_nonborder_mitosmooth_profile_1_2_ser_dark_mean_per_well	nonborder_mitosmooth_profile_1_2_ser_dark_mean_per_well	c	MitoTracker	cell	distribution	asymptote	asymptote	NA	baseline	baseline cell MitoTracker distribution
53	1	pheno1	3	117.295328	6.072193304	107.627561	117.523828	c_nonborder_mitosmooth_profile_1_2_ser_edge_mean_per_well	nonborder_mitosmooth_profile_1_2_ser_edge_mean_per_well	c	MitoTracker	cell	distribution	asymptote	asymptote	NA	baseline	baseline cell MitoTracker distribution
54	1	pheno1	7	100.010935	6.098471248	98.658866	101.657988	c_nonborder_mitosmooth_profile_1_2_ser_hole_mean_per_well	nonborder_mitosmooth_profile_1_2_ser_hole_mean_per_well	c	MitoTracker	cell	distribution	asymptote	asymptote	NA	baseline	baseline cell MitoTracker distribution
55	1	pheno1	13	36.959058	6.136603342	36.872854	37.790046	c_nonborder_mitosmooth_profile_1_2_ser_ridge_mean_per_well	nonborder_mitosmooth_profile_1_2_ser_ridge_mean_per_well	c	MitoTracker	cell	distribution	asymptote	asymptote	maximum response	maximum response	maximum response cell MitoTracker distribution
56	1	pheno1	12	94.519014	6.120320954	94.488611	95.929663	c_nonborder_mitosmooth_profile_1_2_ser_saddle_mean_per_well	nonborder_mitosmooth_profile_1_2_ser_saddle_mean_per_well	c	MitoTracker	cell	distribution	asymptote	asymptote	NA	baseline	baseline cell MitoTracker distribution
57	1	pheno1	18	17.367685	5.984942304	16.929016	85.277488	c_nonborder_mitosmooth_profile_1_2_ser_spot_mean_per_well	nonborder_mitosmooth_profile_1_2_ser_spot_mean_per_well	c	MitoTracker	cell	distribution	asymptote	asymptote	maximum response	maximum response	maximum response cell MitoTracker distribution
58	1	pheno1	2	113.628078	5.594846747	77.022304	146.635528	c_nonborder_mitosmooth_profile_1_2_ser_valley_mean_per_well	nonborder_mitosmooth_profile_1_2_ser_valley_mean_per_well	c	MitoTracker	cell	distribution	asymptote	asymptote	NA	baseline	baseline cell MitoTracker distribution
59	1	pheno1	14	99.447892	6.310285371	99.255268	100.204607	c_nonborder_mitosmooth_profile_2_2_mean_per_well	nonborder_mitosmooth_profile_2_2_mean_per_well	c	MitoTracker	cell	distribution	asymptote	asymptote	NA	baseline	baseline cell MitoTracker distribution
60	1	pheno1	17	63.148657	6.228793357	29.2093	64.813036	c_nonborder_mitosmooth_profile_2_2_ser_bright_mean_per_well	nonborder_mitosmooth_profile_2_2_ser_bright_mean_per_well	c	MitoTracker	cell	distribution	asymptote	asymptote	NA	baseline	baseline cell MitoTracker distribution
61	1	pheno1	13	37.600174	8.030950385	35.030178	37.709715	c_nonborder_mitosmooth_profile_2_2_ser_dark_mean_per_well	nonborder_mitosmooth_profile_2_2_ser_dark_mean_per_well	c	MitoTracker	cell	distribution	asymptote	asymptote	NA	baseline	baseline cell MitoTracker distribution
62	1	pheno1	16	93.71225	6.59935336	88.754299	93.916186	c_nonborder_mitosmooth_profile_2_2_ser_edge_mean_per_well	nonborder_mitosmooth_profile_2_2_ser_edge_mean_per_well	c	MitoTracker	cell	distribution	asymptote	asymptote	NA	baseline	baseline cell MitoTracker distribution
63	1	pheno1	2	172.878703	7.244830992	172.85546	173.052279	c_nonborder_mitosmooth_profile_2_2_ser_hole_mean_per_well	nonborder_mitosmooth_profile_2_2_ser_hole_mean_per_well	c	MitoTracker	cell	distribution	asymptote	asymptote	maximum response	maximum response	maximum response cell MitoTracker distribution
64	1	pheno1	5	74.924266	6.147404501	27.383065	75.9411	c_nonborder_mitosmooth_profile_2_2_ser_ridge_mean_per_well	nonborder_mitosmooth_profile_2_2_ser_ridge_mean_per_well	c	MitoTracker	cell	distribution	asymptote	asymptote	NA	baseline	baseline cell MitoTracker distribution
65	1	pheno1	7	46.781828	5.710723329	45.634765	49.082222	c_nonborder_mitosmooth_profile_2_2_ser_saddle_mean_per_well	nonborder_mitosmooth_profile_2_2_ser_saddle_mean_per_well	c	MitoTracker	cell	distribution	asymptote	asymptote	NA	baseline	baseline cell MitoTracker distribution
66	1	pheno1	6	28.309267	6.734956082	27.652608	32.207574	c_nonborder_mitosmooth_profile_2_2_ser_spot_mean_per_well	nonborder_mitosmooth_profile_2_2_ser_spot_mean_per_well	c	MitoTracker	cell	distribution	asymptote	asymptote	NA	baseline	baseline cell MitoTracker distribution
67	1	pheno1	2	143.086885	6.900997613	113.240731	146.331967	c_nonborder_mitosmooth_profile_2_2_ser_valley_mean_per_well	nonborder_mitosmooth_profile_2_2_ser_valley_mean_per_well	c	MitoTracker	cell	distribution	asymptote	asymptote	NA	baseline	baseline cell MitoTracker distribution
68	1	pheno1	14	99.740679	6.664936703	99.335259	101.837148	c_nonborder_mitosmooth_radial_mean_mean_per_well	nonborder_mitosmooth_radial_mean_mean_per_well	c	MitoTracker	cell	distribution	asymptote	asymptote	maximum response	maximum response	maximum response cell MitoTracker distribution
69	1	pheno1	5	27.174459	6.118059036	26.614566	125.323335	c_nonborder_mitosmooth_radial_mean_ratio_ser_bright_mean_per_well	nonborder_mitosmooth_radial_mean_ratio_ser_bright_mean_per_well	c	MitoTracker	cell	distribution	asymptote	asymptote	NA	baseline	baseline cell MitoTracker distribution
70	1	pheno1	17	9.425352	6.015225108	9.258121	65.188117	c_nonborder_mitosmooth_radial_mean_ratio_ser_dark_mean_per_well	nonborder_mitosmooth_radial_mean_ratio_ser_dark_mean_per_well	c	MitoTracker	cell	distribution	asymptote	asymptote	NA	baseline	baseline cell MitoTracker distribution
71	1	pheno1	1	137.855126	6.349158906	136.592403	139.274877	c_nonborder_mitosmooth_radial_mean_ratio_ser_edge_mean_per_well	nonborder_mitosmooth_radial_mean_ratio_ser_edge_mean_per_well	c	MitoTracker	cell	distribution	asymptote	asymptote	NA	baseline	baseline cell MitoTracker distribution
72	1	pheno1	18	38.964913	6.489102751	38.886961	39.567777	c_nonborder_mitosmooth_radial_mean_ratio_ser_hole_mean_per_well	nonborder_mitosmooth_radial_mean_ratio_ser_hole_mean_per_well	c	MitoTracker	cell	distribution	asymptote	asymptote	NA	baseline	baseline cell MitoTracker distribution
73	1	pheno1	3	88.388143	5.364514064	85.172522	101.07006	c_nonborder_mitosmooth_radial_mean_ratio_ser_ridge_mean_per_well	nonborder_mitosmooth_radial_mean_ratio_ser_ridge_mean_per_well	c	MitoTracker	cell	distribution	asymptote	asymptote	NA	baseline	baseline cell MitoTracker distribution
74	1	pheno1	1	137.507572	6.256025521	24.272817	152.190106	c_nonborder_mitosmooth_radial_mean_ratio_ser_saddle_mean_per_well	nonborder_mitosmooth_radial_mean_ratio_ser_saddle_mean_per_well	c	MitoTracker	cell	distribution	asymptote	asymptote	NA	baseline	baseline cell MitoTracker distribution
75	1	pheno1	5	113.764312	6.012482216	113.052675	117.741594	c_nonborder_mitosmooth_radial_mean_ratio_ser_spot_mean_per_well	nonborder_mitosmooth_radial_mean_ratio_ser_spot_mean_per_well	c	MitoTracker	cell	distribution	asymptote	asymptote	NA	baseline	baseline cell MitoTracker distribution
76	1	pheno1	17	9.425352	6.723877192	9.258121	10.765587	c_nonborder_mitosmooth_radial_mean_ratio_ser_valley_mean_per_well	nonborder_mitosmooth_radial_mean_ratio_ser_valley_mean_per_well	c	MitoTracker	cell	distribution	asymptote	asymptote	NA	baseline	baseline cell MitoTracker distribution
77	1	pheno1	14	99.740679	6.496500408	99.332597	101.279176	c_nonborder_mitosmooth_radial_mean_ser_bright_mean_per_well	nonborder_mitosmooth_radial_mean_ser_bright_mean_per_well	c	MitoTracker	cell	distribution	asymptote	asymptote	maximum response	maximum response	maximum response cell MitoTracker distribution
78	1	pheno1	14	99.740679	5.923099461	96.906684	100.559033	c_nonborder_mitosmooth_radial_mean_ser_dark_mean_per_well	nonborder_mitosmooth_radial_mean_ser_dark_mean_per_well	c	MitoTracker	cell	distribution	asymptote	asymptote	maximum response	maximum response	maximum response cell MitoTracker distribution
79	1	pheno1	17	34.681123	6.448867107	34.19324	34.997888	c_nonborder_mitosmooth_radial_mean_ser_edge_mean_per_well	nonborder_mitosmooth_radial_mean_ser_edge_mean_per_well	c	MitoTracker	cell	distribution	asymptote	asymptote	maximum response	maximum response	maximum response cell MitoTracker distribution
80	1	pheno1	14	99.740679	6.234308959	99.316333	100.331998	c_nonborder_mitosmooth_radial_mean_ser_hole_mean_per_well	nonborder_mitosmooth_radial_mean_ser_hole_mean_per_well	c	MitoTracker	cell	distribution	asymptote	asymptote	maximum response	maximum response	maximum response cell MitoTracker distribution
81	1	pheno1	14	99.740679	6.136534071	99.259454	100.305757	c_nonborder_mitosmooth_radial_mean_ser_ridge_mean_per_well	nonborder_mitosmooth_radial_mean_ser_ridge_mean_per_well	c	MitoTracker	cell	distribution	asymptote	asymptote	maximum response	maximum response	maximum response cell MitoTracker distribution
82	1	pheno1	8	119.460086	5.893680936	119.233822	119.997448	c_nonborder_mitosmooth_radial_mean_ser_saddle_mean_per_well	nonborder_mitosmooth_radial_mean_ser_saddle_mean_per_well	c	MitoTracker	cell	distribution	asymptote	asymptote	maximum response	maximum response	maximum response cell MitoTracker distribution
83	1	pheno1	17	34.681123	5.651311476	7.534599	55.288266	c_nonborder_mitosmooth_radial_mean_ser_spot_mean_per_well	nonborder_mitosmooth_radial_mean_ser_spot_mean_per_well	c	MitoTracker	cell	distribution	asymptote	asymptote	maximum response	maximum response	maximum response cell MitoTracker distribution
84	1	pheno1	14	99.740679	5.713177259	47.478897	100.575714	c_nonborder_mitosmooth_radial_mean_ser_valley_mean_per_well	nonborder_mitosmooth_radial_mean_ser_valley_mean_per_well	c	MitoTracker	cell	distribution	asymptote	asymptote	maximum response	maximum response	maximum response cell MitoTracker distribution
85	1	pheno1	18	57.294588	6.127408073	56.816511	78.184794	c_nonborder_mitosmooth_radial_relative_deviation_mean_per_well	nonborder_mitosmooth_radial_relative_deviation_mean_per_well	c	MitoTracker	cell	distribution	asymptote	asymptote	maximum response	maximum response	maximum response cell MitoTracker distribution
86	1	pheno1	X	60.720823	6.40944907	59.452936	66.24005	c_nonborder_mitosmooth_radial_relative_deviation_ser_bright_mean_per_well	nonborder_mitosmooth_radial_relative_deviation_ser_bright_mean_per_well	c	MitoTracker	cell	distribution	asymptote	asymptote	maximum response	maximum response	maximum response cell MitoTracker distribution
87	1	pheno1	5	73.885829	8.575942127	72.900164	75.237525	c_nonborder_mitosmooth_radial_relative_deviation_ser_dark_mean_per_well	nonborder_mitosmooth_radial_relative_deviation_ser_dark_mean_per_well	c	MitoTracker	cell	distribution	asymptote	asymptote	maximum response	maximum response	maximum response cell MitoTracker distribution
88	1	pheno1	9	107.04713	6.713028761	106.539696	107.681208	c_nonborder_mitosmooth_radial_relative_deviation_ser_edge_mean_per_well	nonborder_mitosmooth_radial_relative_deviation_ser_edge_mean_per_well	c	MitoTracker	cell	distribution	asymptote	asymptote	maximum response	maximum response	maximum response cell MitoTracker distribution
89	1	pheno1	5	73.87082	6.91382631	73.055528	73.904143	c_nonborder_mitosmooth_radial_relative_deviation_ser_hole_mean_per_well	nonborder_mitosmooth_radial_relative_deviation_ser_hole_mean_per_well	c	MitoTracker	cell	distribution	asymptote	asymptote	maximum response	maximum response	maximum response cell MitoTracker distribution
90	1	pheno1	11	104.953294	6.559391953	57.394527	106.164699	c_nonborder_mitosmooth_radial_relative_deviation_ser_ridge_mean_per_well	nonborder_mitosmooth_radial_relative_deviation_ser_ridge_mean_per_well	c	MitoTracker	cell	distribution	asymptote	asymptote	maximum response	maximum response	maximum response cell MitoTracker distribution
91	1	pheno1	5	73.604641	7.78184551	72.541803	75.703216	c_nonborder_mitosmooth_radial_relative_deviation_ser_saddle_mean_per_well	nonborder_mitosmooth_radial_relative_deviation_ser_saddle_mean_per_well	c	MitoTracker	cell	distribution	asymptote	asymptote	maximum response	maximum response	maximum response cell MitoTracker distribution
92	1	pheno1	18	57.267824	6.740298848	57.156457	59.389573	c_nonborder_mitosmooth_radial_relative_deviation_ser_spot_mean_per_well	nonborder_mitosmooth_radial_relative_deviation_ser_spot_mean_per_well	c	MitoTracker	cell	distribution	asymptote	asymptote	maximum response	maximum response	maximum response cell MitoTracker distribution
93	1	pheno1	5	73.885829	8.429867852	72.590359	75.703216	c_nonborder_mitosmooth_radial_relative_deviation_ser_valley_mean_per_well	nonborder_mitosmooth_radial_relative_deviation_ser_valley_mean_per_well	c	MitoTracker	cell	distribution	asymptote	asymptote	maximum response	maximum response	maximum response cell MitoTracker distribution
94	1	pheno1	2	148.561905	6.744360314	30.269862	150.818471	c_nonborder_mitosmooth_ratio_width_to_length_mean_per_well	nonborder_mitosmooth_ratio_width_to_length_mean_per_well	c	MitoTracker	cell	shape	asymptote	asymptote	NA	baseline	baseline cell MitoTracker shape
95	1	pheno1	2	148.578178	6.951144167	78.582199	150.49147	c_nonborder_mitosmooth_roundness_mean_per_well	nonborder_mitosmooth_roundness_mean_per_well	c	MitoTracker	cell	shape	asymptote	asymptote	NA	baseline	baseline cell MitoTracker shape
96	1	pheno1	9	68.518199	5.65432667	67.680052	69.150417	c_nonborder_mitosmooth_symmetry_02_mean_per_well	nonborder_mitosmooth_symmetry_02_mean_per_well	c	MitoTracker	cell	distribution	asymptote	asymptote	maximum response	maximum response	maximum response cell MitoTracker distribution
97	1	pheno1	12	29.425347	6.53733429	28.400998	30.030128	c_nonborder_mitosmooth_symmetry_02_ser_bright_mean_per_well	nonborder_mitosmooth_symmetry_02_ser_bright_mean_per_well	c	MitoTracker	cell	distribution	asymptote	asymptote	maximum response	maximum response	maximum response cell MitoTracker distribution
98	1	pheno1	16	23.520588	6.223158318	21.874001	23.924917	c_nonborder_mitosmooth_symmetry_02_ser_dark_mean_per_well	nonborder_mitosmooth_symmetry_02_ser_dark_mean_per_well	c	MitoTracker	cell	distribution	asymptote	asymptote	maximum response	maximum response	maximum response cell MitoTracker distribution
99	1	pheno1	12	31.463942	6.84559297	28.578081	32.901307	c_nonborder_mitosmooth_symmetry_02_ser_edge_mean_per_well	nonborder_mitosmooth_symmetry_02_ser_edge_mean_per_well	c	MitoTracker	cell	distribution	asymptote	asymptote	maximum response	maximum response	maximum response cell MitoTracker distribution
100	1	pheno1	16	24.323237	7.848954183	24.226864	24.448813	c_nonborder_mitosmooth_symmetry_02_ser_hole_mean_per_well	nonborder_mitosmooth_symmetry_02_ser_hole_mean_per_well	c	MitoTracker	cell	distribution	asymptote	asymptote	maximum response	maximum response	maximum response cell MitoTracker distribution
101	1	pheno1	12	29.425347	6.244067905	28.49497	31.591546	c_nonborder_mitosmooth_symmetry_02_ser_ridge_mean_per_well	nonborder_mitosmooth_symmetry_02_ser_ridge_mean_per_well	c	MitoTracker	cell	distribution	asymptote	asymptote	maximum response	maximum response	maximum response cell MitoTracker distribution
102	1	pheno1	12	29.43847	5.435858456	28.558966	56.498555	c_nonborder_mitosmooth_symmetry_02_ser_saddle_mean_per_well	nonborder_mitosmooth_symmetry_02_ser_saddle_mean_per_well	c	MitoTracker	cell	distribution	asymptote	asymptote	maximum response	maximum response	maximum response cell MitoTracker distribution
103	1	pheno1	2	131.124587	5.591113176	128.131278	133.713413	c_nonborder_mitosmooth_symmetry_02_ser_spot_mean_per_well	nonborder_mitosmooth_symmetry_02_ser_spot_mean_per_well	c	MitoTracker	cell	distribution	asymptote	asymptote	maximum response	maximum response	maximum response cell MitoTracker distribution
104	1	pheno1	9	106.796377	6.226612128	105.793572	107.659764	c_nonborder_mitosmooth_symmetry_02_ser_valley_mean_per_well	nonborder_mitosmooth_symmetry_02_ser_valley_mean_per_well	c	MitoTracker	cell	distribution	asymptote	asymptote	maximum response	maximum response	maximum response cell MitoTracker distribution
105	1	pheno1	19	33.022956	6.039925146	32.69593	59.161987	c_nonborder_mitosmooth_symmetry_03_mean_per_well	nonborder_mitosmooth_symmetry_03_mean_per_well	c	MitoTracker	cell	distribution	asymptote	asymptote	maximum response	maximum response	maximum response cell MitoTracker distribution
106	1	pheno1	7	103.776129	6.01965123	102.909585	105.550026	c_nonborder_mitosmooth_symmetry_03_ser_bright_mean_per_well	nonborder_mitosmooth_symmetry_03_ser_bright_mean_per_well	c	MitoTracker	cell	distribution	asymptote	asymptote	NA	baseline	baseline cell MitoTracker distribution
107	1	pheno1	16	23.313839	6.151126935	23.147202	23.790522	c_nonborder_mitosmooth_symmetry_03_ser_dark_mean_per_well	nonborder_mitosmooth_symmetry_03_ser_dark_mean_per_well	c	MitoTracker	cell	distribution	asymptote	asymptote	maximum response	maximum response	maximum response cell MitoTracker distribution
108	1	pheno1	18	53.755068	5.589456011	25.748853	57.393499	c_nonborder_mitosmooth_symmetry_03_ser_edge_mean_per_well	nonborder_mitosmooth_symmetry_03_ser_edge_mean_per_well	c	MitoTracker	cell	distribution	asymptote	asymptote	maximum response	maximum response	maximum response cell MitoTracker distribution
109	1	pheno1	2	158.27058	6.000605188	72.083818	162.209028	c_nonborder_mitosmooth_symmetry_03_ser_hole_mean_per_well	nonborder_mitosmooth_symmetry_03_ser_hole_mean_per_well	c	MitoTracker	cell	distribution	asymptote	asymptote	NA	baseline	baseline cell MitoTracker distribution
110	1	pheno1	18	25.087473	6.62191182	4.511616	25.748853	c_nonborder_mitosmooth_symmetry_03_ser_ridge_mean_per_well	nonborder_mitosmooth_symmetry_03_ser_ridge_mean_per_well	c	MitoTracker	cell	distribution	asymptote	asymptote	NA	baseline	baseline cell MitoTracker distribution
111	1	pheno1	19	25.727874	5.520260948	25.609349	29.95372	c_nonborder_mitosmooth_symmetry_03_ser_saddle_mean_per_well	nonborder_mitosmooth_symmetry_03_ser_saddle_mean_per_well	c	MitoTracker	cell	distribution	asymptote	asymptote	NA	baseline	baseline cell MitoTracker distribution
112	1	pheno1	18	7.878528	7.018253007	5.526503	12.196985	c_nonborder_mitosmooth_symmetry_03_ser_spot_mean_per_well	nonborder_mitosmooth_symmetry_03_ser_spot_mean_per_well	c	MitoTracker	cell	distribution	asymptote	asymptote	NA	baseline	baseline cell MitoTracker distribution
113	1	pheno1	15	48.784472	5.478696447	36.34394	51.663762	c_nonborder_mitosmooth_symmetry_03_ser_valley_mean_per_well	nonborder_mitosmooth_symmetry_03_ser_valley_mean_per_well	c	MitoTracker	cell	distribution	asymptote	asymptote	maximum response	maximum response	maximum response cell MitoTracker distribution
114	1	pheno1	16	23.554615	6.054881554	19.231703	24.323237	c_nonborder_mitosmooth_symmetry_04_mean_per_well	nonborder_mitosmooth_symmetry_04_mean_per_well	c	MitoTracker	cell	distribution	asymptote	asymptote	maximum response	maximum response	maximum response cell MitoTracker distribution
115	1	pheno1	16	23.521057	6.851328702	23.267383	23.827587	c_nonborder_mitosmooth_symmetry_04_ser_bright_mean_per_well	nonborder_mitosmooth_symmetry_04_ser_bright_mean_per_well	c	MitoTracker	cell	distribution	asymptote	asymptote	maximum response	maximum response	maximum response cell MitoTracker distribution
116	1	pheno1	16	23.35124	6.778728172	20.814691	23.924917	c_nonborder_mitosmooth_symmetry_04_ser_dark_mean_per_well	nonborder_mitosmooth_symmetry_04_ser_dark_mean_per_well	c	MitoTracker	cell	distribution	asymptote	asymptote	maximum response	maximum response	maximum response cell MitoTracker distribution
117	1	pheno1	16	23.778904	5.888735954	17.479566	24.013316	c_nonborder_mitosmooth_symmetry_04_ser_edge_mean_per_well	nonborder_mitosmooth_symmetry_04_ser_edge_mean_per_well	c	MitoTracker	cell	distribution	asymptote	asymptote	maximum response	maximum response	maximum response cell MitoTracker distribution
118	1	pheno1	1	185.166357	6.391811056	35.152984	185.976344	c_nonborder_mitosmooth_symmetry_04_ser_hole_mean_per_well	nonborder_mitosmooth_symmetry_04_ser_hole_mean_per_well	c	MitoTracker	cell	distribution	asymptote	asymptote	NA	baseline	baseline cell MitoTracker distribution
119	1	pheno1	9	116.900242	6.460880799	115.688078	118.849881	c_nonborder_mitosmooth_symmetry_04_ser_ridge_mean_per_well	nonborder_mitosmooth_symmetry_04_ser_ridge_mean_per_well	c	MitoTracker	cell	distribution	asymptote	asymptote	maximum response	maximum response	maximum response cell MitoTracker distribution
120	1	pheno1	7	129.53885	6.201760305	128.906341	130.761236	c_nonborder_mitosmooth_symmetry_04_ser_saddle_mean_per_well	nonborder_mitosmooth_symmetry_04_ser_saddle_mean_per_well	c	MitoTracker	cell	distribution	asymptote	asymptote	maximum response	maximum response	maximum response cell MitoTracker distribution
121	1	pheno1	19	55.661677	6.996858121	55.540058	55.773089	c_nonborder_mitosmooth_symmetry_04_ser_spot_mean_per_well	nonborder_mitosmooth_symmetry_04_ser_spot_mean_per_well	c	MitoTracker	cell	distribution	asymptote	asymptote	maximum response	maximum response	maximum response cell MitoTracker distribution
122	1	pheno1	9	106.674034	7.585648834	105.793572	107.606558	c_nonborder_mitosmooth_symmetry_04_ser_valley_mean_per_well	nonborder_mitosmooth_symmetry_04_ser_valley_mean_per_well	c	MitoTracker	cell	distribution	asymptote	asymptote	maximum response	maximum response	maximum response cell MitoTracker distribution
123	1	pheno1	14	18.908973	5.878557583	17.756093	19.594813	c_nonborder_mitosmooth_symmetry_05_mean_per_well	nonborder_mitosmooth_symmetry_05_mean_per_well	c	MitoTracker	cell	distribution	asymptote	asymptote	maximum response	maximum response	maximum response cell MitoTracker distribution
124	1	pheno1	8	102.785987	6.65259275	102.663836	103.461914	c_nonborder_mitosmooth_symmetry_05_ser_bright_mean_per_well	nonborder_mitosmooth_symmetry_05_ser_bright_mean_per_well	c	MitoTracker	cell	distribution	asymptote	asymptote	NA	baseline	baseline cell MitoTracker distribution
125	1	pheno1	9	106.674034	6.289518668	101.968811	107.600732	c_nonborder_mitosmooth_symmetry_05_ser_dark_mean_per_well	nonborder_mitosmooth_symmetry_05_ser_dark_mean_per_well	c	MitoTracker	cell	distribution	asymptote	asymptote	maximum response	maximum response	maximum response cell MitoTracker distribution
126	1	pheno1	12	31.484238	6.588548294	28.578081	34.603643	c_nonborder_mitosmooth_symmetry_05_ser_edge_mean_per_well	nonborder_mitosmooth_symmetry_05_ser_edge_mean_per_well	c	MitoTracker	cell	distribution	asymptote	asymptote	maximum response	maximum response	maximum response cell MitoTracker distribution
127	1	pheno1	8	108.486304	7.135223714	107.627483	108.550377	c_nonborder_mitosmooth_symmetry_05_ser_hole_mean_per_well	nonborder_mitosmooth_symmetry_05_ser_hole_mean_per_well	c	MitoTracker	cell	distribution	asymptote	asymptote	NA	baseline	baseline cell MitoTracker distribution
128	1	pheno1	1	35.603995	8.935129576	34.487132	37.907046	c_nonborder_mitosmooth_symmetry_05_ser_ridge_mean_per_well	nonborder_mitosmooth_symmetry_05_ser_ridge_mean_per_well	c	MitoTracker	cell	distribution	asymptote	asymptote	NA	baseline	baseline cell MitoTracker distribution
129	1	pheno1	1	35.571212	6.155682007	35.122503	36.241924	c_nonborder_mitosmooth_symmetry_05_ser_saddle_mean_per_well	nonborder_mitosmooth_symmetry_05_ser_saddle_mean_per_well	c	MitoTracker	cell	distribution	asymptote	asymptote	maximum response	maximum response	maximum response cell MitoTracker distribution
130	1	pheno1	18	9.487195	8.471755326	5.70076	12.242865	c_nonborder_mitosmooth_symmetry_05_ser_spot_mean_per_well	nonborder_mitosmooth_symmetry_05_ser_spot_mean_per_well	c	MitoTracker	cell	distribution	asymptote	asymptote	NA	baseline	baseline cell MitoTracker distribution
131	1	pheno1	18	56.73216	5.827606463	53.30002	57.258301	c_nonborder_mitosmooth_symmetry_05_ser_valley_mean_per_well	nonborder_mitosmooth_symmetry_05_ser_valley_mean_per_well	c	MitoTracker	cell	distribution	asymptote	asymptote	maximum response	maximum response	maximum response cell MitoTracker distribution
132	1	pheno1	5	48.651051	6.094216441	6.537492	50.99824	c_nonborder_mitosmooth_symmetry_12_mean_per_well	nonborder_mitosmooth_symmetry_12_mean_per_well	c	MitoTracker	cell	distribution	asymptote	asymptote	maximum response	maximum response	maximum response cell MitoTracker distribution
133	1	pheno1	1	35.721123	6.356578231	35.122503	37.615339	c_nonborder_mitosmooth_symmetry_12_ser_bright_mean_per_well	nonborder_mitosmooth_symmetry_12_ser_bright_mean_per_well	c	MitoTracker	cell	distribution	asymptote	asymptote	maximum response	maximum response	maximum response cell MitoTracker distribution
134	1	pheno1	18	53.802045	5.950231172	53.288026	54.408075	c_nonborder_mitosmooth_symmetry_12_ser_dark_mean_per_well	nonborder_mitosmooth_symmetry_12_ser_dark_mean_per_well	c	MitoTracker	cell	distribution	asymptote	asymptote	maximum response	maximum response	maximum response cell MitoTracker distribution
135	1	pheno1	1	11.914562	5.544097591	9.964703	143.272097	c_nonborder_mitosmooth_symmetry_12_ser_edge_mean_per_well	nonborder_mitosmooth_symmetry_12_ser_edge_mean_per_well	c	MitoTracker	cell	distribution	asymptote	asymptote	maximum response	maximum response	maximum response cell MitoTracker distribution
136	1	pheno1	12	28.904412	6.603224212	28.578081	34.247274	c_nonborder_mitosmooth_symmetry_12_ser_hole_mean_per_well	nonborder_mitosmooth_symmetry_12_ser_hole_mean_per_well	c	MitoTracker	cell	distribution	asymptote	asymptote	maximum response	maximum response	maximum response cell MitoTracker distribution
137	1	pheno1	1	35.721123	5.710957941	35.122503	180.29887	c_nonborder_mitosmooth_symmetry_12_ser_ridge_mean_per_well	nonborder_mitosmooth_symmetry_12_ser_ridge_mean_per_well	c	MitoTracker	cell	distribution	asymptote	asymptote	maximum response	maximum response	maximum response cell MitoTracker distribution
138	1	pheno1	13	38.794205	6.124636234	37.003386	40.126259	c_nonborder_mitosmooth_symmetry_12_ser_saddle_mean_per_well	nonborder_mitosmooth_symmetry_12_ser_saddle_mean_per_well	c	MitoTracker	cell	distribution	asymptote	asymptote	maximum response	maximum response	maximum response cell MitoTracker distribution
139	1	pheno1	13	101.115598	5.75566582	100.791985	102.640516	c_nonborder_mitosmooth_symmetry_12_ser_spot_mean_per_well	nonborder_mitosmooth_symmetry_12_ser_spot_mean_per_well	c	MitoTracker	cell	distribution	asymptote	asymptote	maximum response	maximum response	maximum response cell MitoTracker distribution
140	1	pheno1	1	13.027853	6.60666659	10.262178	34.759027	c_nonborder_mitosmooth_symmetry_12_ser_valley_mean_per_well	nonborder_mitosmooth_symmetry_12_ser_valley_mean_per_well	c	MitoTracker	cell	distribution	asymptote	asymptote	maximum response	maximum response	maximum response cell MitoTracker distribution
141	1	pheno1	9	112.705169	5.21223612	60.265241	118.527228	c_nonborder_mitosmooth_symmetry_13_mean_per_well	nonborder_mitosmooth_symmetry_13_mean_per_well	c	MitoTracker	cell	distribution	asymptote	asymptote	maximum response	maximum response	maximum response cell MitoTracker distribution
142	1	pheno1	13	116.594044	6.353375285	54.924031	118.088996	c_nonborder_mitosmooth_symmetry_13_ser_bright_mean_per_well	nonborder_mitosmooth_symmetry_13_ser_bright_mean_per_well	c	MitoTracker	cell	distribution	asymptote	asymptote	NA	baseline	baseline cell MitoTracker distribution
143	1	pheno1	9	106.536689	5.837155159	68.228478	107.463121	c_nonborder_mitosmooth_symmetry_13_ser_dark_mean_per_well	nonborder_mitosmooth_symmetry_13_ser_dark_mean_per_well	c	MitoTracker	cell	distribution	asymptote	asymptote	maximum response	maximum response	maximum response cell MitoTracker distribution
144	1	pheno1	12	29.341405	6.054785365	28.578081	31.618134	c_nonborder_mitosmooth_symmetry_13_ser_edge_mean_per_well	nonborder_mitosmooth_symmetry_13_ser_edge_mean_per_well	c	MitoTracker	cell	distribution	asymptote	asymptote	maximum response	maximum response	maximum response cell MitoTracker distribution
145	1	pheno1	3	157.160074	6.400658542	146.91166	159.803701	c_nonborder_mitosmooth_symmetry_13_ser_hole_mean_per_well	nonborder_mitosmooth_symmetry_13_ser_hole_mean_per_well	c	MitoTracker	cell	distribution	asymptote	asymptote	NA	baseline	baseline cell MitoTracker distribution
146	1	pheno1	18	25.026568	7.657615352	23.506381	25.704336	c_nonborder_mitosmooth_symmetry_13_ser_ridge_mean_per_well	nonborder_mitosmooth_symmetry_13_ser_ridge_mean_per_well	c	MitoTracker	cell	distribution	asymptote	asymptote	NA	baseline	baseline cell MitoTracker distribution
147	1	pheno1	18	5.95199	8.767367261	4.692648	11.078447	c_nonborder_mitosmooth_symmetry_13_ser_spot_mean_per_well	nonborder_mitosmooth_symmetry_13_ser_spot_mean_per_well	c	MitoTracker	cell	distribution	asymptote	asymptote	NA	baseline	baseline cell MitoTracker distribution
148	1	pheno1	9	106.520045	6.278480414	103.957064	107.493441	c_nonborder_mitosmooth_symmetry_13_ser_valley_mean_per_well	nonborder_mitosmooth_symmetry_13_ser_valley_mean_per_well	c	MitoTracker	cell	distribution	asymptote	asymptote	maximum response	maximum response	maximum response cell MitoTracker distribution
149	1	pheno1	3	26.491749	5.922680252	26.452234	26.747942	c_nonborder_mitosmooth_symmetry_14_mean_per_well	nonborder_mitosmooth_symmetry_14_mean_per_well	c	MitoTracker	cell	distribution	asymptote	asymptote	maximum response	maximum response	maximum response cell MitoTracker distribution
150	1	pheno1	3	103.686538	5.930688499	103.075766	105.257415	c_nonborder_mitosmooth_symmetry_14_ser_bright_mean_per_well	nonborder_mitosmooth_symmetry_14_ser_bright_mean_per_well	c	MitoTracker	cell	distribution	asymptote	asymptote	maximum response	maximum response	maximum response cell MitoTracker distribution
151	1	pheno1	9	106.674034	7.185563944	105.793572	107.606558	c_nonborder_mitosmooth_symmetry_14_ser_dark_mean_per_well	nonborder_mitosmooth_symmetry_14_ser_dark_mean_per_well	c	MitoTracker	cell	distribution	asymptote	asymptote	maximum response	maximum response	maximum response cell MitoTracker distribution
152	1	pheno1	3	21.324974	6.623268407	21.204991	21.34563	c_nonborder_mitosmooth_symmetry_14_ser_edge_mean_per_well	nonborder_mitosmooth_symmetry_14_ser_edge_mean_per_well	c	MitoTracker	cell	distribution	asymptote	asymptote	maximum response	maximum response	maximum response cell MitoTracker distribution
153	1	pheno1	12	17.752208	7.377577133	17.531156	20.291564	c_nonborder_mitosmooth_symmetry_14_ser_hole_mean_per_well	nonborder_mitosmooth_symmetry_14_ser_hole_mean_per_well	c	MitoTracker	cell	distribution	asymptote	asymptote	maximum response	maximum response	maximum response cell MitoTracker distribution
154	1	pheno1	3	103.686538	6.301422751	101.85326	104.753355	c_nonborder_mitosmooth_symmetry_14_ser_ridge_mean_per_well	nonborder_mitosmooth_symmetry_14_ser_ridge_mean_per_well	c	MitoTracker	cell	distribution	asymptote	asymptote	maximum response	maximum response	maximum response cell MitoTracker distribution
155	1	pheno1	1	35.526032	5.959680402	34.378446	41.681741	c_nonborder_mitosmooth_symmetry_14_ser_saddle_mean_per_well	nonborder_mitosmooth_symmetry_14_ser_saddle_mean_per_well	c	MitoTracker	cell	distribution	asymptote	asymptote	maximum response	maximum response	maximum response cell MitoTracker distribution
156	1	pheno1	12	25.383407	5.892845116	19.688093	29.684308	c_nonborder_mitosmooth_symmetry_14_ser_spot_mean_per_well	nonborder_mitosmooth_symmetry_14_ser_spot_mean_per_well	c	MitoTracker	cell	distribution	asymptote	asymptote	maximum response	maximum response	maximum response cell MitoTracker distribution
157	1	pheno1	9	106.674034	7.207020365	105.793572	107.606558	c_nonborder_mitosmooth_symmetry_14_ser_valley_mean_per_well	nonborder_mitosmooth_symmetry_14_ser_valley_mean_per_well	c	MitoTracker	cell	distribution	asymptote	asymptote	maximum response	maximum response	maximum response cell MitoTracker distribution
158	1	pheno1	13	101.209232	5.296397644	99.687907	102.296281	c_nonborder_mitosmooth_symmetry_15_mean_per_well	nonborder_mitosmooth_symmetry_15_mean_per_well	c	MitoTracker	cell	distribution	asymptote	asymptote	maximum response	maximum response	maximum response cell MitoTracker distribution
159	1	pheno1	1	35.721123	5.800146547	11.835789	189.871059	c_nonborder_mitosmooth_symmetry_15_ser_bright_mean_per_well	nonborder_mitosmooth_symmetry_15_ser_bright_mean_per_well	c	MitoTracker	cell	distribution	asymptote	asymptote	maximum response	maximum response	maximum response cell MitoTracker distribution
160	1	pheno1	9	106.674034	6.172022685	103.028015	107.606558	c_nonborder_mitosmooth_symmetry_15_ser_dark_mean_per_well	nonborder_mitosmooth_symmetry_15_ser_dark_mean_per_well	c	MitoTracker	cell	distribution	asymptote	asymptote	maximum response	maximum response	maximum response cell MitoTracker distribution
161	1	pheno1	12	31.484238	6.532310023	28.578081	34.592554	c_nonborder_mitosmooth_symmetry_15_ser_edge_mean_per_well	nonborder_mitosmooth_symmetry_15_ser_edge_mean_per_well	c	MitoTracker	cell	distribution	asymptote	asymptote	maximum response	maximum response	maximum response cell MitoTracker distribution
162	1	pheno1	12	36.385696	5.978519479	35.168488	107.898977	c_nonborder_mitosmooth_symmetry_15_ser_hole_mean_per_well	nonborder_mitosmooth_symmetry_15_ser_hole_mean_per_well	c	MitoTracker	cell	distribution	asymptote	asymptote	NA	baseline	baseline cell MitoTracker distribution
163	1	pheno1	1	35.152984	6.718312213	34.487132	35.723979	c_nonborder_mitosmooth_symmetry_15_ser_ridge_mean_per_well	nonborder_mitosmooth_symmetry_15_ser_ridge_mean_per_well	c	MitoTracker	cell	distribution	asymptote	asymptote	maximum response	maximum response	maximum response cell MitoTracker distribution
164	1	pheno1	3	107.428708	5.670696789	88.547891	108.548468	c_nonborder_mitosmooth_symmetry_15_ser_saddle_mean_per_well	nonborder_mitosmooth_symmetry_15_ser_saddle_mean_per_well	c	MitoTracker	cell	distribution	asymptote	asymptote	maximum response	maximum response	maximum response cell MitoTracker distribution
165	1	pheno1	18	12.191943	6.072193952	5.806101	73.967036	c_nonborder_mitosmooth_symmetry_15_ser_spot_mean_per_well	nonborder_mitosmooth_symmetry_15_ser_spot_mean_per_well	c	MitoTracker	cell	distribution	asymptote	asymptote	NA	baseline	baseline cell MitoTracker distribution
166	1	pheno1	16	23.598137	5.462942939	23.147202	24.034962	c_nonborder_mitosmooth_symmetry_15_ser_valley_mean_per_well	nonborder_mitosmooth_symmetry_15_ser_valley_mean_per_well	c	MitoTracker	cell	distribution	asymptote	asymptote	maximum response	maximum response	maximum response cell MitoTracker distribution
167	1	pheno1	2	148.561905	6.683657443	148.196578	150.721481	c_nonborder_mitosmooth_threshold_compactness_30_percent_mean_per_well	nonborder_mitosmooth_threshold_compactness_30_percent_mean_per_well	c	MitoTracker	cell	compactness	asymptote	asymptote	NA	baseline	baseline cell MitoTracker compactness
168	1	pheno1	2	148.56405	6.614473199	55.089899	149.798991	c_nonborder_mitosmooth_threshold_compactness_30_percent_ser_bright_mean_per_well	nonborder_mitosmooth_threshold_compactness_30_percent_ser_bright_mean_per_well	c	MitoTracker	cell	compactness	asymptote	asymptote	NA	baseline	baseline cell MitoTracker compactness
169	1	pheno1	18	12.078769	8.051414186	5.488269	12.384451	c_nonborder_mitosmooth_threshold_compactness_30_percent_ser_dark_mean_per_well	nonborder_mitosmooth_threshold_compactness_30_percent_ser_dark_mean_per_well	c	MitoTracker	cell	compactness	asymptote	asymptote	NA	baseline	baseline cell MitoTracker compactness
170	1	pheno1	2	148.56405	5.967287724	78.119201	150.721481	c_nonborder_mitosmooth_threshold_compactness_30_percent_ser_edge_mean_per_well	nonborder_mitosmooth_threshold_compactness_30_percent_ser_edge_mean_per_well	c	MitoTracker	cell	compactness	asymptote	asymptote	NA	baseline	baseline cell MitoTracker compactness
171	1	pheno1	18	10.586642	6.470287074	5.402671	12.242865	c_nonborder_mitosmooth_threshold_compactness_30_percent_ser_hole_mean_per_well	nonborder_mitosmooth_threshold_compactness_30_percent_ser_hole_mean_per_well	c	MitoTracker	cell	compactness	asymptote	asymptote	NA	baseline	baseline cell MitoTracker compactness
172	1	pheno1	18	10.563484	6.391420054	5.402671	12.384451	c_nonborder_mitosmooth_threshold_compactness_30_percent_ser_ridge_mean_per_well	nonborder_mitosmooth_threshold_compactness_30_percent_ser_ridge_mean_per_well	c	MitoTracker	cell	compactness	asymptote	asymptote	NA	baseline	baseline cell MitoTracker compactness
173	1	pheno1	18	10.169295	6.308251986	5.455641	12.381925	c_nonborder_mitosmooth_threshold_compactness_30_percent_ser_saddle_mean_per_well	nonborder_mitosmooth_threshold_compactness_30_percent_ser_saddle_mean_per_well	c	MitoTracker	cell	compactness	asymptote	asymptote	NA	baseline	baseline cell MitoTracker compactness
174	1	pheno1	18	12.078769	7.424957663	5.463634	12.384451	c_nonborder_mitosmooth_threshold_compactness_30_percent_ser_spot_mean_per_well	nonborder_mitosmooth_threshold_compactness_30_percent_ser_spot_mean_per_well	c	MitoTracker	cell	compactness	asymptote	asymptote	NA	baseline	baseline cell MitoTracker compactness
175	1	pheno1	18	10.765377	6.498156285	5.459825	12.242865	c_nonborder_mitosmooth_threshold_compactness_30_percent_ser_valley_mean_per_well	nonborder_mitosmooth_threshold_compactness_30_percent_ser_valley_mean_per_well	c	MitoTracker	cell	compactness	asymptote	asymptote	NA	baseline	baseline cell MitoTracker compactness
176	1	pheno1	2	55.974012	6.309009735	55.089899	58.860355	c_nonborder_mitosmooth_threshold_compactness_40_percent_mean_per_well	nonborder_mitosmooth_threshold_compactness_40_percent_mean_per_well	c	MitoTracker	cell	compactness	asymptote	asymptote	NA	baseline	baseline cell MitoTracker compactness
177	1	pheno1	2	55.974012	7.043038578	50.316681	148.623431	c_nonborder_mitosmooth_threshold_compactness_40_percent_ser_bright_mean_per_well	nonborder_mitosmooth_threshold_compactness_40_percent_ser_bright_mean_per_well	c	MitoTracker	cell	compactness	asymptote	asymptote	NA	baseline	baseline cell MitoTracker compactness
178	1	pheno1	2	148.56405	6.952206466	55.752048	150.721481	c_nonborder_mitosmooth_threshold_compactness_40_percent_ser_dark_mean_per_well	nonborder_mitosmooth_threshold_compactness_40_percent_ser_dark_mean_per_well	c	MitoTracker	cell	compactness	asymptote	asymptote	NA	baseline	baseline cell MitoTracker compactness
179	1	pheno1	2	148.56405	6.636322437	55.713905	150.721481	c_nonborder_mitosmooth_threshold_compactness_40_percent_ser_edge_mean_per_well	nonborder_mitosmooth_threshold_compactness_40_percent_ser_edge_mean_per_well	c	MitoTracker	cell	compactness	asymptote	asymptote	NA	baseline	baseline cell MitoTracker compactness
180	1	pheno1	18	10.63103	6.190507728	5.264642	38.832468	c_nonborder_mitosmooth_threshold_compactness_40_percent_ser_hole_mean_per_well	nonborder_mitosmooth_threshold_compactness_40_percent_ser_hole_mean_per_well	c	MitoTracker	cell	compactness	asymptote	asymptote	NA	baseline	baseline cell MitoTracker compactness
181	1	pheno1	18	12.137382	6.821255425	5.459825	12.384451	c_nonborder_mitosmooth_threshold_compactness_40_percent_ser_ridge_mean_per_well	nonborder_mitosmooth_threshold_compactness_40_percent_ser_ridge_mean_per_well	c	MitoTracker	cell	compactness	asymptote	asymptote	NA	baseline	baseline cell MitoTracker compactness
182	1	pheno1	2	55.974012	6.476061104	55.089899	150.275053	c_nonborder_mitosmooth_threshold_compactness_40_percent_ser_saddle_mean_per_well	nonborder_mitosmooth_threshold_compactness_40_percent_ser_saddle_mean_per_well	c	MitoTracker	cell	compactness	asymptote	asymptote	NA	baseline	baseline cell MitoTracker compactness
183	1	pheno1	2	55.974012	7.52425675	55.033162	148.601128	c_nonborder_mitosmooth_threshold_compactness_40_percent_ser_spot_mean_per_well	nonborder_mitosmooth_threshold_compactness_40_percent_ser_spot_mean_per_well	c	MitoTracker	cell	compactness	asymptote	asymptote	NA	baseline	baseline cell MitoTracker compactness
184	1	pheno1	18	12.078769	6.522851106	5.587256	12.384451	c_nonborder_mitosmooth_threshold_compactness_40_percent_ser_valley_mean_per_well	nonborder_mitosmooth_threshold_compactness_40_percent_ser_valley_mean_per_well	c	MitoTracker	cell	compactness	asymptote	asymptote	NA	baseline	baseline cell MitoTracker compactness
185	1	pheno1	13	10.764891	7.921348133	9.259445	12.067805	c_nonborder_mitosmooth_threshold_compactness_50_percent_mean_per_well	nonborder_mitosmooth_threshold_compactness_50_percent_mean_per_well	c	MitoTracker	cell	compactness	asymptote	asymptote	NA	baseline	baseline cell MitoTracker compactness
186	1	pheno1	2	55.974012	7.658876619	54.984125	148.587885	c_nonborder_mitosmooth_threshold_compactness_50_percent_ser_bright_mean_per_well	nonborder_mitosmooth_threshold_compactness_50_percent_ser_bright_mean_per_well	c	MitoTracker	cell	compactness	asymptote	asymptote	NA	baseline	baseline cell MitoTracker compactness
187	1	pheno1	2	148.56405	6.900545722	147.58959	150.739209	c_nonborder_mitosmooth_threshold_compactness_50_percent_ser_dark_mean_per_well	nonborder_mitosmooth_threshold_compactness_50_percent_ser_dark_mean_per_well	c	MitoTracker	cell	compactness	asymptote	asymptote	NA	baseline	baseline cell MitoTracker compactness
188	1	pheno1	2	148.561905	7.185009932	55.921493	150.721481	c_nonborder_mitosmooth_threshold_compactness_50_percent_ser_edge_mean_per_well	nonborder_mitosmooth_threshold_compactness_50_percent_ser_edge_mean_per_well	c	MitoTracker	cell	compactness	asymptote	asymptote	NA	baseline	baseline cell MitoTracker compactness
189	1	pheno1	18	12.078769	6.18929246	5.459825	12.302619	c_nonborder_mitosmooth_threshold_compactness_50_percent_ser_hole_mean_per_well	nonborder_mitosmooth_threshold_compactness_50_percent_ser_hole_mean_per_well	c	MitoTracker	cell	compactness	asymptote	asymptote	NA	baseline	baseline cell MitoTracker compactness
190	1	pheno1	2	148.561905	7.10763387	55.092955	150.721481	c_nonborder_mitosmooth_threshold_compactness_50_percent_ser_ridge_mean_per_well	nonborder_mitosmooth_threshold_compactness_50_percent_ser_ridge_mean_per_well	c	MitoTracker	cell	compactness	asymptote	asymptote	NA	baseline	baseline cell MitoTracker compactness
191	1	pheno1	18	12.078769	7.388068209	5.967848	12.381925	c_nonborder_mitosmooth_threshold_compactness_50_percent_ser_saddle_mean_per_well	nonborder_mitosmooth_threshold_compactness_50_percent_ser_saddle_mean_per_well	c	MitoTracker	cell	compactness	asymptote	asymptote	NA	baseline	baseline cell MitoTracker compactness
192	1	pheno1	2	55.974012	7.49945658	54.984125	148.601128	c_nonborder_mitosmooth_threshold_compactness_50_percent_ser_spot_mean_per_well	nonborder_mitosmooth_threshold_compactness_50_percent_ser_spot_mean_per_well	c	MitoTracker	cell	compactness	asymptote	asymptote	NA	baseline	baseline cell MitoTracker compactness
193	1	pheno1	18	10.831732	6.755799124	5.488269	12.302619	c_nonborder_mitosmooth_threshold_compactness_50_percent_ser_valley_mean_per_well	nonborder_mitosmooth_threshold_compactness_50_percent_ser_valley_mean_per_well	c	MitoTracker	cell	compactness	asymptote	asymptote	NA	baseline	baseline cell MitoTracker compactness
194	1	pheno1	6	47.004714	6.834636994	42.693395	47.028063	c_nonborder_mitosmooth_threshold_compactness_60_percent_mean_per_well	nonborder_mitosmooth_threshold_compactness_60_percent_mean_per_well	c	MitoTracker	cell	compactness	asymptote	asymptote	NA	baseline	baseline cell MitoTracker compactness
195	1	pheno1	2	56.484377	7.17166546	50.435018	148.587885	c_nonborder_mitosmooth_threshold_compactness_60_percent_ser_bright_mean_per_well	nonborder_mitosmooth_threshold_compactness_60_percent_ser_bright_mean_per_well	c	MitoTracker	cell	compactness	asymptote	asymptote	NA	baseline	baseline cell MitoTracker compactness
196	1	pheno1	18	10.251161	6.518050399	3.01212	12.384451	c_nonborder_mitosmooth_threshold_compactness_60_percent_ser_dark_mean_per_well	nonborder_mitosmooth_threshold_compactness_60_percent_ser_dark_mean_per_well	c	MitoTracker	cell	compactness	asymptote	asymptote	NA	baseline	baseline cell MitoTracker compactness
197	1	pheno1	18	11.039102	6.530723849	4.671703	12.384451	c_nonborder_mitosmooth_threshold_compactness_60_percent_ser_edge_mean_per_well	nonborder_mitosmooth_threshold_compactness_60_percent_ser_edge_mean_per_well	c	MitoTracker	cell	compactness	asymptote	asymptote	NA	baseline	baseline cell MitoTracker compactness
198	1	pheno1	5	20.644385	5.953642941	19.048885	136.05714	c_nonborder_mitosmooth_threshold_compactness_60_percent_ser_hole_mean_per_well	nonborder_mitosmooth_threshold_compactness_60_percent_ser_hole_mean_per_well	c	MitoTracker	cell	compactness	asymptote	asymptote	NA	baseline	baseline cell MitoTracker compactness
199	1	pheno1	2	148.56405	7.173102735	55.092955	150.721481	c_nonborder_mitosmooth_threshold_compactness_60_percent_ser_ridge_mean_per_well	nonborder_mitosmooth_threshold_compactness_60_percent_ser_ridge_mean_per_well	c	MitoTracker	cell	compactness	asymptote	asymptote	NA	baseline	baseline cell MitoTracker compactness
200	1	pheno1	18	12.137382	6.670796981	5.70076	12.384451	c_nonborder_mitosmooth_threshold_compactness_60_percent_ser_saddle_mean_per_well	nonborder_mitosmooth_threshold_compactness_60_percent_ser_saddle_mean_per_well	c	MitoTracker	cell	compactness	asymptote	asymptote	NA	baseline	baseline cell MitoTracker compactness
201	1	pheno1	2	55.974012	7.801322976	50.47766	57.065072	c_nonborder_mitosmooth_threshold_compactness_60_percent_ser_spot_mean_per_well	nonborder_mitosmooth_threshold_compactness_60_percent_ser_spot_mean_per_well	c	MitoTracker	cell	compactness	asymptote	asymptote	NA	baseline	baseline cell MitoTracker compactness
202	1	pheno1	11	57.760615	6.113296023	56.375681	58.211917	c_nonborder_mitosmooth_threshold_compactness_60_percent_ser_valley_mean_per_well	nonborder_mitosmooth_threshold_compactness_60_percent_ser_valley_mean_per_well	c	MitoTracker	cell	compactness	asymptote	asymptote	NA	baseline	baseline cell MitoTracker compactness
203	1	pheno1	18	46.906045	5.918988334	38.6953	47.448545	c_nonborder_mitosmooth_width_mm_mean_per_well	nonborder_mitosmooth_width_mm_mean_per_well	c	MitoTracker	cell	size	asymptote	asymptote	maximum response	maximum response	maximum response cell MitoTracker size
204	1	pheno1	5	125.313674	6.980346511	124.643439	125.65749	c_nonborder_mitotracker_cell_area_mm2_mean_per_well	nonborder_mitotracker_cell_area_mm2_mean_per_well	c	MitoTracker	mitochondria	size	asymptote	asymptote	maximum response	maximum response	maximum response mitochondria MitoTracker size
205	1	pheno1	4	78.210322	6.163647599	35.400333	79.377688	c_nonborder_mitotracker_cell_length_mm_mean_per_well	nonborder_mitotracker_cell_length_mm_mean_per_well	c	MitoTracker	mitochondria	size	asymptote	asymptote	maximum response	maximum response	maximum response mitochondria MitoTracker size
206	1	pheno1	10	85.950878	7.578597157	85.742544	86.296202	c_nonborder_mitotracker_cell_ratio_width_to_length_mean_per_well	nonborder_mitotracker_cell_ratio_width_to_length_mean_per_well	c	MitoTracker	mitochondria	shape	asymptote	asymptote	NA	baseline	baseline mitochondria MitoTracker shape
207	1	pheno1	18	11.986717	8.72935956	5.806101	12.387209	c_nonborder_mitotracker_cell_roundness_mean_per_well	nonborder_mitotracker_cell_roundness_mean_per_well	c	MitoTracker	mitochondria	shape	asymptote	asymptote	NA	baseline	baseline mitochondria MitoTracker shape
208	1	pheno1	9	81.865283	7.431987537	80.714429	82.865814	c_nonborder_mitotracker_cell_width_mm_mean_per_well	nonborder_mitotracker_cell_width_mm_mean_per_well	c	MitoTracker	mitochondria	size	asymptote	asymptote	maximum response	maximum response	maximum response mitochondria MitoTracker size
209	1	pheno1	14	94.194413	7.131833187	93.459952	94.713538	c_nonborder_nucleus_alexa_488_ser_bright_3_px_mean_per_well	nonborder_nucleus_alexa_488_ser_bright_3_px_mean_per_well	c	H2AX	nucleus	texture	asymptote	asymptote	NA	baseline	baseline nucleus H2AX texture
210	1	pheno1	14	77.23364	6.219137608	74.871442	94.789911	c_nonborder_nucleus_alexa_488_ser_edge_3_px_mean_per_well	nonborder_nucleus_alexa_488_ser_edge_3_px_mean_per_well	c	H2AX	nucleus	texture	asymptote	asymptote	NA	baseline	baseline nucleus H2AX texture
211	1	pheno1	1	185.266152	7.050838662	184.964985	187.030388	c_nonborder_nucleus_alexa_488_ser_ridge_3_px_mean_per_well	nonborder_nucleus_alexa_488_ser_ridge_3_px_mean_per_well	c	H2AX	nucleus	texture	asymptote	asymptote	NA	baseline	baseline nucleus H2AX texture
212	1	pheno1	5	93.199717	6.274809243	90.641309	96.311247	c_nonborder_nucleus_alexa_488_ser_saddle_3_px_mean_per_well	nonborder_nucleus_alexa_488_ser_saddle_3_px_mean_per_well	c	H2AX	nucleus	texture	asymptote	asymptote	NA	baseline	baseline nucleus H2AX texture
213	1	pheno1	2	79.354155	7.034166293	77.950617	81.018689	c_nonborder_nucleus_alexa_488_ser_spot_3_px_mean_per_well	nonborder_nucleus_alexa_488_ser_spot_3_px_mean_per_well	c	H2AX	nucleus	texture	asymptote	asymptote	NA	baseline	baseline nucleus H2AX texture
214	1	pheno1	14	19.401644	6.277673996	10.239253	77.755665	c_nonborder_nucleus_area_mm2_mean_per_well	nonborder_nucleus_area_mm2_mean_per_well	c	Hoechst	nucleus	size	asymptote	asymptote	maximum response	maximum response	maximum response nucleus Hoechst size
215	1	pheno1	11	81.382401	6.458704705	80.98853	81.615858	c_nonborder_nucleus_axial_length_ratio_2_mean_per_well	nonborder_nucleus_axial_length_ratio_2_mean_per_well	c	Hoechst	nucleus	distribution	asymptote	asymptote	NA	baseline	baseline nucleus Hoechst distribution
216	1	pheno1	19	58.365948	6.587658331	17.221707	58.653057	c_nonborder_nucleus_axial_length_ratio_mean_per_well	nonborder_nucleus_axial_length_ratio_mean_per_well	c	Hoechst	nucleus	distribution	asymptote	asymptote	NA	baseline	baseline nucleus Hoechst distribution
217	1	pheno1	8	48.67146	7.322354728	36.787985	49.892358	c_nonborder_nucleus_axial_length_ratio_ser_bright_2_mean_per_well	nonborder_nucleus_axial_length_ratio_ser_bright_2_mean_per_well	c	Hoechst	nucleus	distribution	asymptote	asymptote	NA	baseline	baseline nucleus Hoechst distribution
218	1	pheno1	19	17.591307	7.531092782	17.315125	17.666891	c_nonborder_nucleus_axial_length_ratio_ser_bright_mean_per_well	nonborder_nucleus_axial_length_ratio_ser_bright_mean_per_well	c	Hoechst	nucleus	distribution	asymptote	asymptote	NA	baseline	baseline nucleus Hoechst distribution
219	1	pheno1	7	96.591268	8.440245263	96.149758	97.260868	c_nonborder_nucleus_axial_length_ratio_ser_dark_2_mean_per_well	nonborder_nucleus_axial_length_ratio_ser_dark_2_mean_per_well	c	Hoechst	nucleus	distribution	asymptote	asymptote	NA	baseline	baseline nucleus Hoechst distribution
220	1	pheno1	7	96.591268	7.447215502	96.149758	96.824444	c_nonborder_nucleus_axial_length_ratio_ser_dark_mean_per_well	nonborder_nucleus_axial_length_ratio_ser_dark_mean_per_well	c	Hoechst	nucleus	distribution	asymptote	asymptote	NA	baseline	baseline nucleus Hoechst distribution
221	1	pheno1	7	96.591268	7.211918585	96.149758	97.464244	c_nonborder_nucleus_axial_length_ratio_ser_edge_2_mean_per_well	nonborder_nucleus_axial_length_ratio_ser_edge_2_mean_per_well	c	Hoechst	nucleus	distribution	asymptote	asymptote	NA	baseline	baseline nucleus Hoechst distribution
222	1	pheno1	7	96.591268	7.197242949	96.149758	97.441711	c_nonborder_nucleus_axial_length_ratio_ser_edge_mean_per_well	nonborder_nucleus_axial_length_ratio_ser_edge_mean_per_well	c	Hoechst	nucleus	distribution	asymptote	asymptote	NA	baseline	baseline nucleus Hoechst distribution
223	1	pheno1	1	11.914562	7.762467766	10.555149	12.273136	c_nonborder_nucleus_axial_length_ratio_ser_hole_2_mean_per_well	nonborder_nucleus_axial_length_ratio_ser_hole_2_mean_per_well	c	Hoechst	nucleus	distribution	asymptote	asymptote	maximum response	maximum response	maximum response nucleus Hoechst distribution
224	1	pheno1	19	46.075951	6.605251671	31.491388	46.596798	c_nonborder_nucleus_axial_length_ratio_ser_hole_mean_per_well	nonborder_nucleus_axial_length_ratio_ser_hole_mean_per_well	c	Hoechst	nucleus	distribution	asymptote	asymptote	NA	baseline	baseline nucleus Hoechst distribution
225	1	pheno1	13	17.746616	6.316039285	15.893145	118.437956	c_nonborder_nucleus_axial_length_ratio_ser_ridge_2_mean_per_well	nonborder_nucleus_axial_length_ratio_ser_ridge_2_mean_per_well	c	Hoechst	nucleus	distribution	asymptote	asymptote	NA	baseline	baseline nucleus Hoechst distribution
226	1	pheno1	19	17.591307	6.372298672	17.315125	58.443063	c_nonborder_nucleus_axial_length_ratio_ser_ridge_mean_per_well	nonborder_nucleus_axial_length_ratio_ser_ridge_mean_per_well	c	Hoechst	nucleus	distribution	asymptote	asymptote	NA	baseline	baseline nucleus Hoechst distribution
227	1	pheno1	7	96.591268	6.691244846	96.149758	97.464244	c_nonborder_nucleus_axial_length_ratio_ser_saddle_2_mean_per_well	nonborder_nucleus_axial_length_ratio_ser_saddle_2_mean_per_well	c	Hoechst	nucleus	distribution	asymptote	asymptote	NA	baseline	baseline nucleus Hoechst distribution
228	1	pheno1	7	96.591268	6.266522959	96.149758	98.035563	c_nonborder_nucleus_axial_length_ratio_ser_saddle_mean_per_well	nonborder_nucleus_axial_length_ratio_ser_saddle_mean_per_well	c	Hoechst	nucleus	distribution	asymptote	asymptote	NA	baseline	baseline nucleus Hoechst distribution
229	1	pheno1	13	17.783421	6.292697042	15.970456	113.802534	c_nonborder_nucleus_axial_length_ratio_ser_spot_2_mean_per_well	nonborder_nucleus_axial_length_ratio_ser_spot_2_mean_per_well	c	Hoechst	nucleus	distribution	asymptote	asymptote	NA	baseline	baseline nucleus Hoechst distribution
230	1	pheno1	12	80.565918	7.202596156	79.954956	82.139933	c_nonborder_nucleus_axial_length_ratio_ser_spot_mean_per_well	nonborder_nucleus_axial_length_ratio_ser_spot_mean_per_well	c	Hoechst	nucleus	distribution	asymptote	asymptote	NA	baseline	baseline nucleus Hoechst distribution
231	1	pheno1	7	96.591268	7.010653698	96.149758	100.147361	c_nonborder_nucleus_axial_length_ratio_ser_valley_2_mean_per_well	nonborder_nucleus_axial_length_ratio_ser_valley_2_mean_per_well	c	Hoechst	nucleus	distribution	asymptote	asymptote	NA	baseline	baseline nucleus Hoechst distribution
232	1	pheno1	7	96.591268	7.577478968	96.149758	96.824444	c_nonborder_nucleus_axial_length_ratio_ser_valley_mean_per_well	nonborder_nucleus_axial_length_ratio_ser_valley_mean_per_well	c	Hoechst	nucleus	distribution	asymptote	asymptote	NA	baseline	baseline nucleus Hoechst distribution
233	1	pheno1	14	19.401644	6.887237115	10.547359	19.594813	c_nonborder_nucleus_axial_small_length_2_mean_per_well	nonborder_nucleus_axial_small_length_2_mean_per_well	c	Hoechst	nucleus	distribution	asymptote	asymptote	maximum response	maximum response	maximum response nucleus Hoechst distribution
234	1	pheno1	2	78.358533	7.714772792	78.35151	78.945092	c_nonborder_nucleus_axial_small_length_mean_per_well	nonborder_nucleus_axial_small_length_mean_per_well	c	H2AX	nucleus	size	asymptote	asymptote	maximum response	maximum response	maximum response nucleus H2AX size
235	1	pheno1	18	30.052335	6.943580351	29.282257	33.779777	c_nonborder_nucleus_axial_small_length_ser_bright_2_mean_per_well	nonborder_nucleus_axial_small_length_ser_bright_2_mean_per_well	c	Hoechst	nucleus	distribution	asymptote	asymptote	maximum response	maximum response	maximum response nucleus Hoechst distribution
236	1	pheno1	14	19.401644	6.044412688	10.485963	77.755665	c_nonborder_nucleus_axial_small_length_ser_bright_mean_per_well	nonborder_nucleus_axial_small_length_ser_bright_mean_per_well	c	H2AX	nucleus	distribution	asymptote	asymptote	maximum response	maximum response	maximum response nucleus H2AX distribution
237	1	pheno1	17	69.312168	5.934437892	15.711086	69.618861	c_nonborder_nucleus_axial_small_length_ser_dark_2_mean_per_well	nonborder_nucleus_axial_small_length_ser_dark_2_mean_per_well	c	Hoechst	nucleus	distribution	asymptote	asymptote	maximum response	maximum response	maximum response nucleus Hoechst distribution
238	1	pheno1	1	11.068783	6.696404328	5.955038	12.273136	c_nonborder_nucleus_axial_small_length_ser_dark_mean_per_well	nonborder_nucleus_axial_small_length_ser_dark_mean_per_well	c	H2AX	nucleus	distribution	asymptote	asymptote	maximum response	maximum response	maximum response nucleus H2AX distribution
239	1	pheno1	14	19.401644	6.496307078	10.675457	77.755665	c_nonborder_nucleus_axial_small_length_ser_edge_2_mean_per_well	nonborder_nucleus_axial_small_length_ser_edge_2_mean_per_well	c	Hoechst	nucleus	distribution	asymptote	asymptote	maximum response	maximum response	maximum response nucleus Hoechst distribution
240	1	pheno1	1	11.914562	7.17481832	7.521699	12.785941	c_nonborder_nucleus_axial_small_length_ser_edge_mean_per_well	nonborder_nucleus_axial_small_length_ser_edge_mean_per_well	c	H2AX	nucleus	distribution	asymptote	asymptote	maximum response	maximum response	maximum response nucleus H2AX distribution
241	1	pheno1	15	37.06143	5.984016205	36.297253	39.655905	c_nonborder_nucleus_axial_small_length_ser_hole_2_mean_per_well	nonborder_nucleus_axial_small_length_ser_hole_2_mean_per_well	c	Hoechst	nucleus	distribution	asymptote	asymptote	maximum response	maximum response	maximum response nucleus Hoechst distribution
242	1	pheno1	18	33.739815	7.408525774	29.677543	33.859613	c_nonborder_nucleus_axial_small_length_ser_hole_mean_per_well	nonborder_nucleus_axial_small_length_ser_hole_mean_per_well	c	H2AX	nucleus	distribution	asymptote	asymptote	maximum response	maximum response	maximum response nucleus H2AX distribution
243	1	pheno1	14	76.424154	6.360235128	19.300523	77.707563	c_nonborder_nucleus_axial_small_length_ser_ridge_2_mean_per_well	nonborder_nucleus_axial_small_length_ser_ridge_2_mean_per_well	c	Hoechst	nucleus	distribution	asymptote	asymptote	maximum response	maximum response	maximum response nucleus Hoechst distribution
244	1	pheno1	14	19.401644	5.873083952	10.479427	77.707563	c_nonborder_nucleus_axial_small_length_ser_ridge_mean_per_well	nonborder_nucleus_axial_small_length_ser_ridge_mean_per_well	c	H2AX	nucleus	distribution	asymptote	asymptote	maximum response	maximum response	maximum response nucleus H2AX distribution
245	1	pheno1	1	11.068783	6.629674796	7.969906	185.618243	c_nonborder_nucleus_axial_small_length_ser_saddle_2_mean_per_well	nonborder_nucleus_axial_small_length_ser_saddle_2_mean_per_well	c	Hoechst	nucleus	distribution	asymptote	asymptote	maximum response	maximum response	maximum response nucleus Hoechst distribution
246	1	pheno1	1	11.068783	6.537904882	5.955038	12.740981	c_nonborder_nucleus_axial_small_length_ser_saddle_mean_per_well	nonborder_nucleus_axial_small_length_ser_saddle_mean_per_well	c	H2AX	nucleus	distribution	asymptote	asymptote	maximum response	maximum response	maximum response nucleus H2AX distribution
247	1	pheno1	14	76.424154	6.245829217	75.681737	99.740679	c_nonborder_nucleus_axial_small_length_ser_spot_2_mean_per_well	nonborder_nucleus_axial_small_length_ser_spot_2_mean_per_well	c	Hoechst	nucleus	distribution	asymptote	asymptote	maximum response	maximum response	maximum response nucleus Hoechst distribution
248	1	pheno1	14	10.944098	5.914503003	8.471931	77.707563	c_nonborder_nucleus_axial_small_length_ser_spot_mean_per_well	nonborder_nucleus_axial_small_length_ser_spot_mean_per_well	c	H2AX	nucleus	distribution	asymptote	asymptote	maximum response	maximum response	maximum response nucleus H2AX distribution
249	1	pheno1	1	9.964703	5.956284719	5.846261	191.656242	c_nonborder_nucleus_axial_small_length_ser_valley_2_mean_per_well	nonborder_nucleus_axial_small_length_ser_valley_2_mean_per_well	c	Hoechst	nucleus	distribution	asymptote	asymptote	maximum response	maximum response	maximum response nucleus Hoechst distribution
250	1	pheno1	1	11.068783	6.828554246	6.846773	12.273136	c_nonborder_nucleus_axial_small_length_ser_valley_mean_per_well	nonborder_nucleus_axial_small_length_ser_valley_mean_per_well	c	H2AX	nucleus	distribution	asymptote	asymptote	maximum response	maximum response	maximum response nucleus H2AX distribution
251	1	pheno1	5	31.159651	6.580527192	27.831218	90.797566	c_nonborder_nucleus_hoechst_33342_ser_bright_1_px_mean_per_well	nonborder_nucleus_hoechst_33342_ser_bright_1_px_mean_per_well	c	Hoechst	nucleus	texture	asymptote	asymptote	maximum response	maximum response	maximum response nucleus Hoechst texture
252	1	pheno1	1	47.286127	6.431083634	43.800225	164.295019	c_nonborder_nucleus_hoechst_33342_ser_dark_1_px_mean_per_well	nonborder_nucleus_hoechst_33342_ser_dark_1_px_mean_per_well	c	Hoechst	nucleus	texture	asymptote	asymptote	maximum response	maximum response	maximum response nucleus Hoechst texture
253	1	pheno1	18	11.946322	7.812751635	5.587256	12.387209	c_nonborder_nucleus_hoechst_33342_ser_edge_1_px_mean_per_well	nonborder_nucleus_hoechst_33342_ser_edge_1_px_mean_per_well	c	Hoechst	nucleus	texture	asymptote	asymptote	NA	baseline	baseline nucleus Hoechst texture
254	1	pheno1	1	43.685711	5.964134935	11.835789	191.514199	c_nonborder_nucleus_hoechst_33342_ser_ridge_1_px_mean_per_well	nonborder_nucleus_hoechst_33342_ser_ridge_1_px_mean_per_well	c	Hoechst	nucleus	texture	asymptote	asymptote	maximum response	maximum response	maximum response nucleus Hoechst texture
255	1	pheno1	1	168.520864	6.360721687	34.487132	170.431312	c_nonborder_nucleus_hoechst_33342_ser_saddle_1_px_mean_per_well	nonborder_nucleus_hoechst_33342_ser_saddle_1_px_mean_per_well	c	Hoechst	nucleus	texture	asymptote	asymptote	maximum response	maximum response	maximum response nucleus Hoechst texture
256	1	pheno1	5	31.159651	6.887560685	28.287957	35.624558	c_nonborder_nucleus_hoechst_33342_ser_spot_1_px_mean_per_well	nonborder_nucleus_hoechst_33342_ser_spot_1_px_mean_per_well	c	Hoechst	nucleus	texture	asymptote	asymptote	maximum response	maximum response	maximum response nucleus Hoechst texture
257	1	pheno1	1	168.502544	6.998849615	11.746954	169.584926	c_nonborder_nucleus_hoechst_33342_ser_valley_1_px_mean_per_well	nonborder_nucleus_hoechst_33342_ser_valley_1_px_mean_per_well	c	Hoechst	nucleus	texture	asymptote	asymptote	maximum response	maximum response	maximum response nucleus Hoechst texture
258	1	pheno1	19	17.666891	7.217787916	17.439231	18.074564	c_nonborder_nucleus_length_mm_mean_per_well	nonborder_nucleus_length_mm_mean_per_well	c	Hoechst	nucleus	size	asymptote	asymptote	maximum response	maximum response	maximum response nucleus Hoechst size
259	1	pheno1	2	78.358533	7.205958563	78.35151	150.818471	c_nonborder_nucleus_profile_1_2_2_mean_per_well	nonborder_nucleus_profile_1_2_2_mean_per_well	c	Hoechst	nucleus	distribution	asymptote	asymptote	NA	baseline	baseline nucleus Hoechst distribution
260	1	pheno1	16	27.884455	6.137617482	18.647463	28.386816	c_nonborder_nucleus_profile_1_2_mean_per_well	nonborder_nucleus_profile_1_2_mean_per_well	c	Hoechst	nucleus	distribution	asymptote	asymptote	maximum response	maximum response	maximum response nucleus Hoechst distribution
261	1	pheno1	8	49.840747	7.18546101	45.805941	65.057412	c_nonborder_nucleus_profile_1_2_ser_bright_2_mean_per_well	nonborder_nucleus_profile_1_2_ser_bright_2_mean_per_well	c	Hoechst	nucleus	distribution	asymptote	asymptote	maximum response	maximum response	maximum response nucleus Hoechst distribution
262	1	pheno1	19	30.699236	7.496381849	29.941169	61.103683	c_nonborder_nucleus_profile_1_2_ser_bright_mean_per_well	nonborder_nucleus_profile_1_2_ser_bright_mean_per_well	c	H2AX	nucleus	distribution	asymptote	asymptote	maximum response	maximum response	maximum response nucleus H2AX distribution
263	1	pheno1	1	163.191387	7.343494161	161.292926	164.295019	c_nonborder_nucleus_profile_1_2_ser_dark_2_mean_per_well	nonborder_nucleus_profile_1_2_ser_dark_2_mean_per_well	c	Hoechst	nucleus	distribution	asymptote	asymptote	NA	baseline	baseline nucleus Hoechst distribution
264	1	pheno1	3	123.862472	6.14563394	123.554016	149.075008	c_nonborder_nucleus_profile_1_2_ser_dark_mean_per_well	nonborder_nucleus_profile_1_2_ser_dark_mean_per_well	c	H2AX	nucleus	distribution	asymptote	asymptote	NA	baseline	baseline nucleus H2AX distribution
265	1	pheno1	18	11.947521	8.250385267	5.95199	12.387209	c_nonborder_nucleus_profile_1_2_ser_edge_2_mean_per_well	nonborder_nucleus_profile_1_2_ser_edge_2_mean_per_well	c	Hoechst	nucleus	distribution	asymptote	asymptote	NA	baseline	baseline nucleus Hoechst distribution
266	1	pheno1	17	77.353617	6.272825122	68.493295	79.61851	c_nonborder_nucleus_profile_1_2_ser_edge_mean_per_well	nonborder_nucleus_profile_1_2_ser_edge_mean_per_well	c	H2AX	nucleus	distribution	asymptote	asymptote	NA	baseline	baseline nucleus H2AX distribution
267	1	pheno1	6	98.028262	6.165347899	17.579073	110.876492	c_nonborder_nucleus_profile_1_2_ser_hole_mean_per_well	nonborder_nucleus_profile_1_2_ser_hole_mean_per_well	c	H2AX	nucleus	distribution	asymptote	asymptote	maximum response	maximum response	maximum response nucleus H2AX distribution
268	1	pheno1	8	49.840747	7.23849098	49.083967	65.057412	c_nonborder_nucleus_profile_1_2_ser_ridge_2_mean_per_well	nonborder_nucleus_profile_1_2_ser_ridge_2_mean_per_well	c	Hoechst	nucleus	distribution	asymptote	asymptote	maximum response	maximum response	maximum response nucleus Hoechst distribution
269	1	pheno1	19	30.23942	8.879696994	29.941169	31.023525	c_nonborder_nucleus_profile_1_2_ser_ridge_mean_per_well	nonborder_nucleus_profile_1_2_ser_ridge_mean_per_well	c	H2AX	nucleus	distribution	asymptote	asymptote	maximum response	maximum response	maximum response nucleus H2AX distribution
270	1	pheno1	5	33.825612	7.050135882	27.856118	35.775884	c_nonborder_nucleus_profile_1_2_ser_saddle_2_mean_per_well	nonborder_nucleus_profile_1_2_ser_saddle_2_mean_per_well	c	Hoechst	nucleus	distribution	asymptote	asymptote	NA	baseline	baseline nucleus Hoechst distribution
271	1	pheno1	2	93.546897	5.664249989	29.891929	97.942296	c_nonborder_nucleus_profile_1_2_ser_saddle_mean_per_well	nonborder_nucleus_profile_1_2_ser_saddle_mean_per_well	c	H2AX	nucleus	distribution	asymptote	asymptote	NA	baseline	baseline nucleus H2AX distribution
272	1	pheno1	7	125.209535	6.665477075	113.928081	125.954754	c_nonborder_nucleus_profile_1_2_ser_spot_2_mean_per_well	nonborder_nucleus_profile_1_2_ser_spot_2_mean_per_well	c	Hoechst	nucleus	distribution	asymptote	asymptote	maximum response	maximum response	maximum response nucleus Hoechst distribution
273	1	pheno1	1	3.546055	5.871377966	3.010274	129.281692	c_nonborder_nucleus_profile_1_2_ser_spot_mean_per_well	nonborder_nucleus_profile_1_2_ser_spot_mean_per_well	c	H2AX	nucleus	distribution	asymptote	asymptote	maximum response	maximum response	maximum response nucleus H2AX distribution
274	1	pheno1	1	43.489456	5.646744081	43.174808	168.531538	c_nonborder_nucleus_profile_1_2_ser_valley_2_mean_per_well	nonborder_nucleus_profile_1_2_ser_valley_2_mean_per_well	c	Hoechst	nucleus	distribution	asymptote	asymptote	NA	baseline	baseline nucleus Hoechst distribution
275	1	pheno1	10	89.074128	8.59010278	88.247875	89.600664	c_nonborder_nucleus_profile_1_2_ser_valley_mean_per_well	nonborder_nucleus_profile_1_2_ser_valley_mean_per_well	c	H2AX	nucleus	distribution	asymptote	asymptote	NA	baseline	baseline nucleus H2AX distribution
276	1	pheno1	17	79.448465	6.742307574	78.853284	79.728167	c_nonborder_nucleus_profile_2_2_2_mean_per_well	nonborder_nucleus_profile_2_2_2_mean_per_well	c	Hoechst	nucleus	distribution	asymptote	asymptote	NA	baseline	baseline nucleus Hoechst distribution
277	1	pheno1	14	77.309275	6.271308612	75.620848	77.755665	c_nonborder_nucleus_profile_2_2_mean_per_well	nonborder_nucleus_profile_2_2_mean_per_well	c	Hoechst	nucleus	distribution	asymptote	asymptote	NA	baseline	baseline nucleus Hoechst distribution
278	1	pheno1	1	43.686349	7.992580029	43.447621	43.76603	c_nonborder_nucleus_profile_2_2_ser_bright_2_mean_per_well	nonborder_nucleus_profile_2_2_ser_bright_2_mean_per_well	c	Hoechst	nucleus	distribution	asymptote	asymptote	NA	baseline	baseline nucleus Hoechst distribution
279	1	pheno1	12	73.639514	6.459767539	73.607534	74.077207	c_nonborder_nucleus_profile_2_2_ser_bright_mean_per_well	nonborder_nucleus_profile_2_2_ser_bright_mean_per_well	c	H2AX	nucleus	distribution	asymptote	asymptote	NA	baseline	baseline nucleus H2AX distribution
280	1	pheno1	17	62.822549	6.394774453	58.693105	64.597636	c_nonborder_nucleus_profile_2_2_ser_dark_2_mean_per_well	nonborder_nucleus_profile_2_2_ser_dark_2_mean_per_well	c	Hoechst	nucleus	distribution	asymptote	asymptote	maximum response	maximum response	maximum response nucleus Hoechst distribution
281	1	pheno1	19	8.746102	5.777988574	8.60886	56.993476	c_nonborder_nucleus_profile_2_2_ser_dark_mean_per_well	nonborder_nucleus_profile_2_2_ser_dark_mean_per_well	c	H2AX	nucleus	distribution	asymptote	asymptote	maximum response	maximum response	maximum response nucleus H2AX distribution
282	1	pheno1	3	35.724925	5.974465616	33.640332	36.927139	c_nonborder_nucleus_profile_2_2_ser_edge_2_mean_per_well	nonborder_nucleus_profile_2_2_ser_edge_2_mean_per_well	c	Hoechst	nucleus	distribution	asymptote	asymptote	maximum response	maximum response	maximum response nucleus Hoechst distribution
283	1	pheno1	7	92.03233	7.098065485	91.3689	92.545195	c_nonborder_nucleus_profile_2_2_ser_edge_mean_per_well	nonborder_nucleus_profile_2_2_ser_edge_mean_per_well	c	H2AX	nucleus	distribution	asymptote	asymptote	NA	baseline	baseline nucleus H2AX distribution
284	1	pheno1	10	119.848925	6.359363879	119.724115	120.167739	c_nonborder_nucleus_profile_2_2_ser_hole_mean_per_well	nonborder_nucleus_profile_2_2_ser_hole_mean_per_well	c	H2AX	nucleus	distribution	asymptote	asymptote	maximum response	maximum response	maximum response nucleus H2AX distribution
285	1	pheno1	1	45.256528	6.481148047	44.625107	51.261579	c_nonborder_nucleus_profile_2_2_ser_ridge_mean_per_well	nonborder_nucleus_profile_2_2_ser_ridge_mean_per_well	c	H2AX	nucleus	distribution	asymptote	asymptote	NA	baseline	baseline nucleus H2AX distribution
286	1	pheno1	1	187.265585	6.378137517	184.562625	187.521049	c_nonborder_nucleus_profile_2_2_ser_saddle_mean_per_well	nonborder_nucleus_profile_2_2_ser_saddle_mean_per_well	c	H2AX	nucleus	distribution	asymptote	asymptote	maximum response	maximum response	maximum response nucleus H2AX distribution
287	1	pheno1	19	17.666891	8.044325802	17.292659	18.067598	c_nonborder_nucleus_profile_2_2_ser_spot_2_mean_per_well	nonborder_nucleus_profile_2_2_ser_spot_2_mean_per_well	c	Hoechst	nucleus	distribution	asymptote	asymptote	NA	baseline	baseline nucleus Hoechst distribution
288	1	pheno1	2	79.313042	8.374938456	78.170828	79.354155	c_nonborder_nucleus_profile_2_2_ser_spot_mean_per_well	nonborder_nucleus_profile_2_2_ser_spot_mean_per_well	c	H2AX	nucleus	distribution	asymptote	asymptote	NA	baseline	baseline nucleus H2AX distribution
289	1	pheno1	17	64.563901	7.053361872	61.725073	64.706362	c_nonborder_nucleus_profile_2_2_ser_valley_2_mean_per_well	nonborder_nucleus_profile_2_2_ser_valley_2_mean_per_well	c	Hoechst	nucleus	distribution	asymptote	asymptote	maximum response	maximum response	maximum response nucleus Hoechst distribution
290	1	pheno1	15	59.903178	7.420549645	58.917115	97.098348	c_nonborder_nucleus_profile_2_2_ser_valley_mean_per_well	nonborder_nucleus_profile_2_2_ser_valley_mean_per_well	c	H2AX	nucleus	distribution	asymptote	asymptote	maximum response	maximum response	maximum response nucleus H2AX distribution
291	1	pheno1	14	77.551686	6.545392996	75.681737	77.755665	c_nonborder_nucleus_radial_mean_2_mean_per_well	nonborder_nucleus_radial_mean_2_mean_per_well	c	Hoechst	nucleus	distribution	asymptote	asymptote	maximum response	maximum response	maximum response nucleus Hoechst distribution
292	1	pheno1	19	17.666891	7.046031907	17.558988	18.067598	c_nonborder_nucleus_radial_mean_mean_per_well	nonborder_nucleus_radial_mean_mean_per_well	c	Hoechst	nucleus	distribution	asymptote	asymptote	maximum response	maximum response	maximum response nucleus Hoechst distribution
293	1	pheno1	X	164.40631	5.768450909	163.244938	166.339881	c_nonborder_nucleus_radial_mean_ratio_ser_bright_2_mean_per_well	nonborder_nucleus_radial_mean_ratio_ser_bright_2_mean_per_well	c	Hoechst	nucleus	distribution	asymptote	asymptote	maximum response	maximum response	maximum response nucleus Hoechst distribution
294	1	pheno1	1	22.846735	7.038365232	22.063773	38.463431	c_nonborder_nucleus_radial_mean_ratio_ser_bright_mean_per_well	nonborder_nucleus_radial_mean_ratio_ser_bright_mean_per_well	c	H2AX	nucleus	distribution	asymptote	asymptote	maximum response	maximum response	maximum response nucleus H2AX distribution
295	1	pheno1	10	26.645822	7.697286809	26.372215	26.879792	c_nonborder_nucleus_radial_mean_ratio_ser_dark_2_mean_per_well	nonborder_nucleus_radial_mean_ratio_ser_dark_2_mean_per_well	c	Hoechst	nucleus	distribution	asymptote	asymptote	NA	baseline	baseline nucleus Hoechst distribution
296	1	pheno1	18	35.068004	7.213273669	34.393506	35.11988	c_nonborder_nucleus_radial_mean_ratio_ser_dark_mean_per_well	nonborder_nucleus_radial_mean_ratio_ser_dark_mean_per_well	c	H2AX	nucleus	distribution	asymptote	asymptote	NA	baseline	baseline nucleus H2AX distribution
297	1	pheno1	12	109.092957	8.524745454	109.02818	109.410742	c_nonborder_nucleus_radial_mean_ratio_ser_edge_2_mean_per_well	nonborder_nucleus_radial_mean_ratio_ser_edge_2_mean_per_well	c	Hoechst	nucleus	distribution	asymptote	asymptote	NA	baseline	baseline nucleus Hoechst distribution
298	1	pheno1	15	27.189758	6.248134759	26.934094	32.329995	c_nonborder_nucleus_radial_mean_ratio_ser_edge_mean_per_well	nonborder_nucleus_radial_mean_ratio_ser_edge_mean_per_well	c	H2AX	nucleus	distribution	asymptote	asymptote	NA	baseline	baseline nucleus H2AX distribution
299	1	pheno1	6	20.515684	5.65891783	17.629335	144.947278	c_nonborder_nucleus_radial_mean_ratio_ser_hole_2_mean_per_well	nonborder_nucleus_radial_mean_ratio_ser_hole_2_mean_per_well	c	Hoechst	nucleus	distribution	asymptote	asymptote	NA	baseline	baseline nucleus Hoechst distribution
300	1	pheno1	15	18.992385	6.269953073	13.145362	56.974059	c_nonborder_nucleus_radial_mean_ratio_ser_hole_mean_per_well	nonborder_nucleus_radial_mean_ratio_ser_hole_mean_per_well	c	H2AX	nucleus	distribution	asymptote	asymptote	NA	baseline	baseline nucleus H2AX distribution
301	1	pheno1	17	31.346292	5.838645259	31.235033	31.61211	c_nonborder_nucleus_radial_mean_ratio_ser_ridge_2_mean_per_well	nonborder_nucleus_radial_mean_ratio_ser_ridge_2_mean_per_well	c	Hoechst	nucleus	distribution	asymptote	asymptote	maximum response	maximum response	maximum response nucleus Hoechst distribution
302	1	pheno1	1	22.196916	7.153079343	22.092211	23.089876	c_nonborder_nucleus_radial_mean_ratio_ser_ridge_mean_per_well	nonborder_nucleus_radial_mean_ratio_ser_ridge_mean_per_well	c	H2AX	nucleus	distribution	asymptote	asymptote	maximum response	maximum response	maximum response nucleus H2AX distribution
303	1	pheno1	14	46.507289	5.936201347	46.36782	78.045369	c_nonborder_nucleus_radial_mean_ratio_ser_saddle_2_mean_per_well	nonborder_nucleus_radial_mean_ratio_ser_saddle_2_mean_per_well	c	Hoechst	nucleus	distribution	asymptote	asymptote	NA	baseline	baseline nucleus Hoechst distribution
304	1	pheno1	1	39.663274	5.646238205	37.67063	43.733026	c_nonborder_nucleus_radial_mean_ratio_ser_saddle_mean_per_well	nonborder_nucleus_radial_mean_ratio_ser_saddle_mean_per_well	c	H2AX	nucleus	distribution	asymptote	asymptote	NA	baseline	baseline nucleus H2AX distribution
305	1	pheno1	17	85.600851	6.744390313	85.292709	85.888973	c_nonborder_nucleus_radial_mean_ratio_ser_spot_2_mean_per_well	nonborder_nucleus_radial_mean_ratio_ser_spot_2_mean_per_well	c	Hoechst	nucleus	distribution	asymptote	asymptote	maximum response	maximum response	maximum response nucleus Hoechst distribution
306	1	pheno1	1	22.101084	7.243164923	22.019536	23.046686	c_nonborder_nucleus_radial_mean_ratio_ser_spot_mean_per_well	nonborder_nucleus_radial_mean_ratio_ser_spot_mean_per_well	c	H2AX	nucleus	distribution	asymptote	asymptote	maximum response	maximum response	maximum response nucleus H2AX distribution
307	1	pheno1	10	26.645822	7.437457074	25.926067	26.879792	c_nonborder_nucleus_radial_mean_ratio_ser_valley_2_mean_per_well	nonborder_nucleus_radial_mean_ratio_ser_valley_2_mean_per_well	c	Hoechst	nucleus	distribution	asymptote	asymptote	NA	baseline	baseline nucleus Hoechst distribution
308	1	pheno1	18	35.068004	6.329570711	27.676875	35.113551	c_nonborder_nucleus_radial_mean_ratio_ser_valley_mean_per_well	nonborder_nucleus_radial_mean_ratio_ser_valley_mean_per_well	c	H2AX	nucleus	distribution	asymptote	asymptote	NA	baseline	baseline nucleus H2AX distribution
309	1	pheno1	19	17.666891	6.419183779	17.292659	18.58649	c_nonborder_nucleus_radial_mean_ser_bright_2_mean_per_well	nonborder_nucleus_radial_mean_ser_bright_2_mean_per_well	c	Hoechst	nucleus	distribution	asymptote	asymptote	maximum response	maximum response	maximum response nucleus Hoechst distribution
310	1	pheno1	19	17.666891	7.16419963	17.480724	18.074564	c_nonborder_nucleus_radial_mean_ser_bright_mean_per_well	nonborder_nucleus_radial_mean_ser_bright_mean_per_well	c	H2AX	nucleus	distribution	asymptote	asymptote	maximum response	maximum response	maximum response nucleus H2AX distribution
311	1	pheno1	1	43.685711	7.172844391	10.555149	46.504288	c_nonborder_nucleus_radial_mean_ser_dark_2_mean_per_well	nonborder_nucleus_radial_mean_ser_dark_2_mean_per_well	c	Hoechst	nucleus	distribution	asymptote	asymptote	maximum response	maximum response	maximum response nucleus Hoechst distribution
312	1	pheno1	19	17.666891	7.181436429	17.122189	18.089809	c_nonborder_nucleus_radial_mean_ser_dark_mean_per_well	nonborder_nucleus_radial_mean_ser_dark_mean_per_well	c	H2AX	nucleus	distribution	asymptote	asymptote	maximum response	maximum response	maximum response nucleus H2AX distribution
313	1	pheno1	19	17.666891	6.576248877	14.827495	18.089809	c_nonborder_nucleus_radial_mean_ser_edge_2_mean_per_well	nonborder_nucleus_radial_mean_ser_edge_2_mean_per_well	c	Hoechst	nucleus	distribution	asymptote	asymptote	maximum response	maximum response	maximum response nucleus Hoechst distribution
314	1	pheno1	19	17.666891	6.76684833	17.292659	42.426702	c_nonborder_nucleus_radial_mean_ser_edge_mean_per_well	nonborder_nucleus_radial_mean_ser_edge_mean_per_well	c	H2AX	nucleus	distribution	asymptote	asymptote	maximum response	maximum response	maximum response nucleus H2AX distribution
315	1	pheno1	14	19.401644	7.244302935	18.227663	19.594813	c_nonborder_nucleus_radial_mean_ser_hole_2_mean_per_well	nonborder_nucleus_radial_mean_ser_hole_2_mean_per_well	c	Hoechst	nucleus	distribution	asymptote	asymptote	maximum response	maximum response	maximum response nucleus Hoechst distribution
316	1	pheno1	1	43.685711	6.993007125	7.771532	45.310196	c_nonborder_nucleus_radial_mean_ser_hole_mean_per_well	nonborder_nucleus_radial_mean_ser_hole_mean_per_well	c	H2AX	nucleus	distribution	asymptote	asymptote	maximum response	maximum response	maximum response nucleus H2AX distribution
317	1	pheno1	19	17.666891	6.209719947	17.292659	18.58649	c_nonborder_nucleus_radial_mean_ser_ridge_2_mean_per_well	nonborder_nucleus_radial_mean_ser_ridge_2_mean_per_well	c	Hoechst	nucleus	distribution	asymptote	asymptote	maximum response	maximum response	maximum response nucleus Hoechst distribution
318	1	pheno1	19	17.666891	6.735684365	17.493787	18.522829	c_nonborder_nucleus_radial_mean_ser_ridge_mean_per_well	nonborder_nucleus_radial_mean_ser_ridge_mean_per_well	c	H2AX	nucleus	distribution	asymptote	asymptote	maximum response	maximum response	maximum response nucleus H2AX distribution
319	1	pheno1	17	69.312168	6.903601026	68.756614	69.564259	c_nonborder_nucleus_radial_mean_ser_saddle_2_mean_per_well	nonborder_nucleus_radial_mean_ser_saddle_2_mean_per_well	c	Hoechst	nucleus	distribution	asymptote	asymptote	maximum response	maximum response	maximum response nucleus Hoechst distribution
320	1	pheno1	14	77.551686	6.647360504	10.547359	77.755665	c_nonborder_nucleus_radial_mean_ser_saddle_mean_per_well	nonborder_nucleus_radial_mean_ser_saddle_mean_per_well	c	H2AX	nucleus	distribution	asymptote	asymptote	maximum response	maximum response	maximum response nucleus H2AX distribution
321	1	pheno1	19	17.666891	6.782620077	17.292659	18.28564	c_nonborder_nucleus_radial_mean_ser_spot_2_mean_per_well	nonborder_nucleus_radial_mean_ser_spot_2_mean_per_well	c	Hoechst	nucleus	distribution	asymptote	asymptote	maximum response	maximum response	maximum response nucleus Hoechst distribution
322	1	pheno1	19	17.666891	6.991720406	17.292659	18.089809	c_nonborder_nucleus_radial_mean_ser_spot_mean_per_well	nonborder_nucleus_radial_mean_ser_spot_mean_per_well	c	H2AX	nucleus	distribution	asymptote	asymptote	maximum response	maximum response	maximum response nucleus H2AX distribution
323	1	pheno1	17	69.312168	5.814620019	62.422915	69.566628	c_nonborder_nucleus_radial_mean_ser_valley_2_mean_per_well	nonborder_nucleus_radial_mean_ser_valley_2_mean_per_well	c	Hoechst	nucleus	distribution	asymptote	asymptote	maximum response	maximum response	maximum response nucleus Hoechst distribution
324	1	pheno1	19	17.666891	6.920575746	14.882773	18.089809	c_nonborder_nucleus_radial_mean_ser_valley_mean_per_well	nonborder_nucleus_radial_mean_ser_valley_mean_per_well	c	H2AX	nucleus	distribution	asymptote	asymptote	maximum response	maximum response	maximum response nucleus H2AX distribution
325	1	pheno1	2	78.358533	6.369657898	29.578355	133.4367	c_nonborder_nucleus_radial_relative_deviation_2_mean_per_well	nonborder_nucleus_radial_relative_deviation_2_mean_per_well	c	Hoechst	nucleus	distribution	asymptote	asymptote	NA	baseline	baseline nucleus Hoechst distribution
326	1	pheno1	10	100.70493	6.080205241	99.424405	101.639398	c_nonborder_nucleus_radial_relative_deviation_mean_per_well	nonborder_nucleus_radial_relative_deviation_mean_per_well	c	H2AX	nucleus	distribution	asymptote	asymptote	NA	baseline	baseline nucleus H2AX distribution
327	1	pheno1	2	45.670796	5.913223747	45.472319	48.552549	c_nonborder_nucleus_radial_relative_deviation_ser_bright_2_mean_per_well	nonborder_nucleus_radial_relative_deviation_ser_bright_2_mean_per_well	c	Hoechst	nucleus	distribution	asymptote	asymptote	NA	baseline	baseline nucleus Hoechst distribution
328	1	pheno1	16	50.830672	7.891223443	49.575946	51.565327	c_nonborder_nucleus_radial_relative_deviation_ser_bright_mean_per_well	nonborder_nucleus_radial_relative_deviation_ser_bright_mean_per_well	c	H2AX	nucleus	distribution	asymptote	asymptote	NA	baseline	baseline nucleus H2AX distribution
329	1	pheno1	17	62.841133	6.812338346	54.213885	64.583353	c_nonborder_nucleus_radial_relative_deviation_ser_dark_2_mean_per_well	nonborder_nucleus_radial_relative_deviation_ser_dark_2_mean_per_well	c	Hoechst	nucleus	distribution	asymptote	asymptote	maximum response	maximum response	maximum response nucleus Hoechst distribution
330	1	pheno1	9	112.591791	6.546586366	111.378776	112.909066	c_nonborder_nucleus_radial_relative_deviation_ser_dark_mean_per_well	nonborder_nucleus_radial_relative_deviation_ser_dark_mean_per_well	c	H2AX	nucleus	distribution	asymptote	asymptote	maximum response	maximum response	maximum response nucleus H2AX distribution
331	1	pheno1	17	61.971062	6.706587737	58.114659	64.580892	c_nonborder_nucleus_radial_relative_deviation_ser_edge_2_mean_per_well	nonborder_nucleus_radial_relative_deviation_ser_edge_2_mean_per_well	c	Hoechst	nucleus	distribution	asymptote	asymptote	maximum response	maximum response	maximum response nucleus Hoechst distribution
332	1	pheno1	16	69.843995	7.09615343	69.339204	70.467013	c_nonborder_nucleus_radial_relative_deviation_ser_edge_mean_per_well	nonborder_nucleus_radial_relative_deviation_ser_edge_mean_per_well	c	H2AX	nucleus	distribution	asymptote	asymptote	maximum response	maximum response	maximum response nucleus H2AX distribution
333	1	pheno1	10	119.919068	5.981899621	119.724115	120.618316	c_nonborder_nucleus_radial_relative_deviation_ser_hole_2_mean_per_well	nonborder_nucleus_radial_relative_deviation_ser_hole_2_mean_per_well	c	Hoechst	nucleus	distribution	asymptote	asymptote	maximum response	maximum response	maximum response nucleus Hoechst distribution
334	1	pheno1	5	23.775871	6.82683113	23.040103	24.341621	c_nonborder_nucleus_radial_relative_deviation_ser_hole_mean_per_well	nonborder_nucleus_radial_relative_deviation_ser_hole_mean_per_well	c	H2AX	nucleus	distribution	asymptote	asymptote	maximum response	maximum response	maximum response nucleus H2AX distribution
335	1	pheno1	7	144.273582	6.153745059	143.846413	145.331717	c_nonborder_nucleus_radial_relative_deviation_ser_ridge_2_mean_per_well	nonborder_nucleus_radial_relative_deviation_ser_ridge_2_mean_per_well	c	Hoechst	nucleus	distribution	asymptote	asymptote	NA	baseline	baseline nucleus Hoechst distribution
336	1	pheno1	10	100.825914	7.650150629	99.787252	102.139455	c_nonborder_nucleus_radial_relative_deviation_ser_ridge_mean_per_well	nonborder_nucleus_radial_relative_deviation_ser_ridge_mean_per_well	c	H2AX	nucleus	distribution	asymptote	asymptote	NA	baseline	baseline nucleus H2AX distribution
337	1	pheno1	17	62.841133	7.379443159	61.362114	64.580892	c_nonborder_nucleus_radial_relative_deviation_ser_saddle_2_mean_per_well	nonborder_nucleus_radial_relative_deviation_ser_saddle_2_mean_per_well	c	Hoechst	nucleus	distribution	asymptote	asymptote	maximum response	maximum response	maximum response nucleus Hoechst distribution
338	1	pheno1	1	44.582222	7.122340951	43.387671	46.898755	c_nonborder_nucleus_radial_relative_deviation_ser_saddle_mean_per_well	nonborder_nucleus_radial_relative_deviation_ser_saddle_mean_per_well	c	H2AX	nucleus	distribution	asymptote	asymptote	maximum response	maximum response	maximum response nucleus H2AX distribution
339	1	pheno1	10	119.302735	6.481526539	118.169703	119.724115	c_nonborder_nucleus_radial_relative_deviation_ser_spot_2_mean_per_well	nonborder_nucleus_radial_relative_deviation_ser_spot_2_mean_per_well	c	Hoechst	nucleus	distribution	asymptote	asymptote	maximum response	maximum response	maximum response nucleus Hoechst distribution
340	1	pheno1	2	80.010069	7.730082907	79.771723	81.01133	c_nonborder_nucleus_radial_relative_deviation_ser_spot_mean_per_well	nonborder_nucleus_radial_relative_deviation_ser_spot_mean_per_well	c	H2AX	nucleus	distribution	asymptote	asymptote	NA	baseline	baseline nucleus H2AX distribution
341	1	pheno1	17	62.841133	7.001657946	54.213885	64.580892	c_nonborder_nucleus_radial_relative_deviation_ser_valley_2_mean_per_well	nonborder_nucleus_radial_relative_deviation_ser_valley_2_mean_per_well	c	Hoechst	nucleus	distribution	asymptote	asymptote	maximum response	maximum response	maximum response nucleus Hoechst distribution
342	1	pheno1	1	45.598788	6.758346795	24.435251	46.898755	c_nonborder_nucleus_radial_relative_deviation_ser_valley_mean_per_well	nonborder_nucleus_radial_relative_deviation_ser_valley_mean_per_well	c	H2AX	nucleus	distribution	asymptote	asymptote	maximum response	maximum response	maximum response nucleus H2AX distribution
343	1	pheno1	7	96.591268	6.232319672	96.149758	114.790092	c_nonborder_nucleus_ratio_width_to_length_mean_per_well	nonborder_nucleus_ratio_width_to_length_mean_per_well	c	Hoechst	nucleus	shape	asymptote	asymptote	NA	baseline	baseline nucleus Hoechst shape
344	1	pheno1	5	126.953461	6.729694612	126.508072	127.385001	c_nonborder_nucleus_roundness_mean_per_well	nonborder_nucleus_roundness_mean_per_well	c	Hoechst	nucleus	shape	asymptote	asymptote	NA	baseline	baseline nucleus Hoechst shape
345	1	pheno1	15	94.276382	6.264682313	27.40518	94.547873	c_nonborder_nucleus_symmetry_02_2_mean_per_well	nonborder_nucleus_symmetry_02_2_mean_per_well	c	Hoechst	nucleus	distribution	asymptote	asymptote	maximum response	maximum response	maximum response nucleus Hoechst distribution
346	1	pheno1	16	46.889591	6.726485179	45.693797	48.596708	c_nonborder_nucleus_symmetry_02_mean_per_well	nonborder_nucleus_symmetry_02_mean_per_well	c	H2AX	nucleus	distribution	asymptote	asymptote	maximum response	maximum response	maximum response nucleus H2AX distribution
347	1	pheno1	16	51.409245	5.974789844	49.376505	51.586223	c_nonborder_nucleus_symmetry_02_ser_bright_2_mean_per_well	nonborder_nucleus_symmetry_02_ser_bright_2_mean_per_well	c	Hoechst	nucleus	distribution	asymptote	asymptote	maximum response	maximum response	maximum response nucleus Hoechst distribution
348	1	pheno1	16	48.370407	8.24621127	45.657531	49.575946	c_nonborder_nucleus_symmetry_02_ser_bright_mean_per_well	nonborder_nucleus_symmetry_02_ser_bright_mean_per_well	c	H2AX	nucleus	distribution	asymptote	asymptote	NA	baseline	baseline nucleus H2AX distribution
349	1	pheno1	9	62.227058	5.904354811	59.008578	66.239071	c_nonborder_nucleus_symmetry_02_ser_dark_2_mean_per_well	nonborder_nucleus_symmetry_02_ser_dark_2_mean_per_well	c	Hoechst	nucleus	distribution	asymptote	asymptote	maximum response	maximum response	maximum response nucleus Hoechst distribution
350	1	pheno1	6	38.500445	8.473037466	37.750362	40.146165	c_nonborder_nucleus_symmetry_02_ser_dark_mean_per_well	nonborder_nucleus_symmetry_02_ser_dark_mean_per_well	c	H2AX	nucleus	distribution	asymptote	asymptote	maximum response	maximum response	maximum response nucleus H2AX distribution
351	1	pheno1	17	61.811586	5.856279118	54.213885	64.580892	c_nonborder_nucleus_symmetry_02_ser_edge_2_mean_per_well	nonborder_nucleus_symmetry_02_ser_edge_2_mean_per_well	c	Hoechst	nucleus	distribution	asymptote	asymptote	maximum response	maximum response	maximum response nucleus Hoechst distribution
352	1	pheno1	14	104.116743	5.956818907	100.985354	104.879191	c_nonborder_nucleus_symmetry_02_ser_edge_mean_per_well	nonborder_nucleus_symmetry_02_ser_edge_mean_per_well	c	H2AX	nucleus	distribution	asymptote	asymptote	maximum response	maximum response	maximum response nucleus H2AX distribution
353	1	pheno1	13	11.905359	6.045938996	11.678863	12.123682	c_nonborder_nucleus_symmetry_02_ser_hole_2_mean_per_well	nonborder_nucleus_symmetry_02_ser_hole_2_mean_per_well	c	Hoechst	nucleus	distribution	asymptote	asymptote	NA	baseline	baseline nucleus Hoechst distribution
354	1	pheno1	9	50.955458	5.380725273	50.324088	111.054147	c_nonborder_nucleus_symmetry_02_ser_hole_mean_per_well	nonborder_nucleus_symmetry_02_ser_hole_mean_per_well	c	H2AX	nucleus	distribution	asymptote	asymptote	NA	baseline	baseline nucleus H2AX distribution
355	1	pheno1	11	106.622484	7.188548303	63.227978	107.742038	c_nonborder_nucleus_symmetry_02_ser_ridge_2_mean_per_well	nonborder_nucleus_symmetry_02_ser_ridge_2_mean_per_well	c	Hoechst	nucleus	distribution	asymptote	asymptote	maximum response	maximum response	maximum response nucleus Hoechst distribution
356	1	pheno1	16	48.340034	6.801891972	45.685367	49.659334	c_nonborder_nucleus_symmetry_02_ser_ridge_mean_per_well	nonborder_nucleus_symmetry_02_ser_ridge_mean_per_well	c	H2AX	nucleus	distribution	asymptote	asymptote	NA	baseline	baseline nucleus H2AX distribution
357	1	pheno1	11	83.813706	7.061283872	82.583672	84.832017	c_nonborder_nucleus_symmetry_02_ser_saddle_2_mean_per_well	nonborder_nucleus_symmetry_02_ser_saddle_2_mean_per_well	c	Hoechst	nucleus	distribution	asymptote	asymptote	maximum response	maximum response	maximum response nucleus Hoechst distribution
358	1	pheno1	15	27.411875	5.373950157	27.080658	27.955735	c_nonborder_nucleus_symmetry_02_ser_saddle_mean_per_well	nonborder_nucleus_symmetry_02_ser_saddle_mean_per_well	c	H2AX	nucleus	distribution	asymptote	asymptote	maximum response	maximum response	maximum response nucleus H2AX distribution
359	1	pheno1	14	115.557897	7.053649545	112.561908	115.795128	c_nonborder_nucleus_symmetry_02_ser_spot_2_mean_per_well	nonborder_nucleus_symmetry_02_ser_spot_2_mean_per_well	c	Hoechst	nucleus	distribution	asymptote	asymptote	NA	baseline	baseline nucleus Hoechst distribution
360	1	pheno1	2	133.400881	6.130941498	132.25924	145.188763	c_nonborder_nucleus_symmetry_02_ser_spot_mean_per_well	nonborder_nucleus_symmetry_02_ser_spot_mean_per_well	c	H2AX	nucleus	distribution	asymptote	asymptote	NA	baseline	baseline nucleus H2AX distribution
361	1	pheno1	15	36.413019	6.505897232	36.146537	36.504829	c_nonborder_nucleus_symmetry_02_ser_valley_2_mean_per_well	nonborder_nucleus_symmetry_02_ser_valley_2_mean_per_well	c	Hoechst	nucleus	distribution	asymptote	asymptote	maximum response	maximum response	maximum response nucleus Hoechst distribution
362	1	pheno1	14	105.250605	6.799532311	104.874084	110.939408	c_nonborder_nucleus_symmetry_02_ser_valley_mean_per_well	nonborder_nucleus_symmetry_02_ser_valley_mean_per_well	c	H2AX	nucleus	distribution	asymptote	asymptote	maximum response	maximum response	maximum response nucleus H2AX distribution
363	1	pheno1	14	80.244308	6.16897323	78.784419	82.274103	c_nonborder_nucleus_symmetry_03_2_mean_per_well	nonborder_nucleus_symmetry_03_2_mean_per_well	c	Hoechst	nucleus	distribution	asymptote	asymptote	maximum response	maximum response	maximum response nucleus Hoechst distribution
364	1	pheno1	18	29.395513	5.484614991	28.959253	75.906612	c_nonborder_nucleus_symmetry_03_mean_per_well	nonborder_nucleus_symmetry_03_mean_per_well	c	H2AX	nucleus	distribution	asymptote	asymptote	NA	baseline	baseline nucleus H2AX distribution
365	1	pheno1	16	80.154586	6.417847093	79.397289	92.632363	c_nonborder_nucleus_symmetry_03_ser_bright_2_mean_per_well	nonborder_nucleus_symmetry_03_ser_bright_2_mean_per_well	c	Hoechst	nucleus	distribution	asymptote	asymptote	NA	baseline	baseline nucleus Hoechst distribution
366	1	pheno1	1	187.392713	7.586562311	185.640882	187.463427	c_nonborder_nucleus_symmetry_03_ser_bright_mean_per_well	nonborder_nucleus_symmetry_03_ser_bright_mean_per_well	c	H2AX	nucleus	distribution	asymptote	asymptote	NA	baseline	baseline nucleus H2AX distribution
367	1	pheno1	8	67.238619	7.421932143	63.628798	67.554768	c_nonborder_nucleus_symmetry_03_ser_dark_2_mean_per_well	nonborder_nucleus_symmetry_03_ser_dark_2_mean_per_well	c	Hoechst	nucleus	distribution	asymptote	asymptote	NA	baseline	baseline nucleus Hoechst distribution
368	1	pheno1	1	93.003253	6.487941335	92.856621	187.521049	c_nonborder_nucleus_symmetry_03_ser_dark_mean_per_well	nonborder_nucleus_symmetry_03_ser_dark_mean_per_well	c	H2AX	nucleus	distribution	asymptote	asymptote	NA	baseline	baseline nucleus H2AX distribution
369	1	pheno1	7	101.654942	6.750401189	19.677967	103.721242	c_nonborder_nucleus_symmetry_03_ser_edge_2_mean_per_well	nonborder_nucleus_symmetry_03_ser_edge_2_mean_per_well	c	Hoechst	nucleus	distribution	asymptote	asymptote	maximum response	maximum response	maximum response nucleus Hoechst distribution
370	1	pheno1	17	53.634833	6.596616638	9.463587	54.246161	c_nonborder_nucleus_symmetry_03_ser_edge_mean_per_well	nonborder_nucleus_symmetry_03_ser_edge_mean_per_well	c	H2AX	nucleus	distribution	asymptote	asymptote	maximum response	maximum response	maximum response nucleus H2AX distribution
371	1	pheno1	3	20.104096	7.426106442	19.67663	21.59881	c_nonborder_nucleus_symmetry_03_ser_hole_2_mean_per_well	nonborder_nucleus_symmetry_03_ser_hole_2_mean_per_well	c	Hoechst	nucleus	distribution	asymptote	asymptote	NA	baseline	baseline nucleus Hoechst distribution
372	1	pheno1	1	187.463427	6.103691905	184.92656	188.086882	c_nonborder_nucleus_symmetry_03_ser_hole_mean_per_well	nonborder_nucleus_symmetry_03_ser_hole_mean_per_well	c	H2AX	nucleus	distribution	asymptote	asymptote	NA	baseline	baseline nucleus H2AX distribution
373	1	pheno1	7	126.143448	7.00434001	35.398674	129.839693	c_nonborder_nucleus_symmetry_03_ser_ridge_2_mean_per_well	nonborder_nucleus_symmetry_03_ser_ridge_2_mean_per_well	c	Hoechst	nucleus	distribution	asymptote	asymptote	NA	baseline	baseline nucleus Hoechst distribution
374	1	pheno1	1	186.838419	8.309831209	185.650655	187.44893	c_nonborder_nucleus_symmetry_03_ser_ridge_mean_per_well	nonborder_nucleus_symmetry_03_ser_ridge_mean_per_well	c	H2AX	nucleus	distribution	asymptote	asymptote	NA	baseline	baseline nucleus H2AX distribution
375	1	pheno1	18	81.089445	7.494058979	80.652799	81.212865	c_nonborder_nucleus_symmetry_03_ser_saddle_2_mean_per_well	nonborder_nucleus_symmetry_03_ser_saddle_2_mean_per_well	c	Hoechst	nucleus	distribution	asymptote	asymptote	NA	baseline	baseline nucleus Hoechst distribution
376	1	pheno1	1	128.387382	7.334392501	126.765299	128.948553	c_nonborder_nucleus_symmetry_03_ser_saddle_mean_per_well	nonborder_nucleus_symmetry_03_ser_saddle_mean_per_well	c	H2AX	nucleus	distribution	asymptote	asymptote	NA	baseline	baseline nucleus H2AX distribution
377	1	pheno1	7	36.034097	5.535833044	34.679593	36.398002	c_nonborder_nucleus_symmetry_03_ser_spot_2_mean_per_well	nonborder_nucleus_symmetry_03_ser_spot_2_mean_per_well	c	Hoechst	nucleus	distribution	asymptote	asymptote	NA	baseline	baseline nucleus Hoechst distribution
378	1	pheno1	1	186.838419	7.814937349	185.650655	187.463427	c_nonborder_nucleus_symmetry_03_ser_spot_mean_per_well	nonborder_nucleus_symmetry_03_ser_spot_mean_per_well	c	H2AX	nucleus	distribution	asymptote	asymptote	NA	baseline	baseline nucleus H2AX distribution
379	1	pheno1	1	93.204675	6.147414253	11.548492	95.498515	c_nonborder_nucleus_symmetry_03_ser_valley_mean_per_well	nonborder_nucleus_symmetry_03_ser_valley_mean_per_well	c	H2AX	nucleus	distribution	asymptote	asymptote	NA	baseline	baseline nucleus H2AX distribution
380	1	pheno1	15	94.326317	7.081677434	94.143526	94.841762	c_nonborder_nucleus_symmetry_04_2_mean_per_well	nonborder_nucleus_symmetry_04_2_mean_per_well	c	Hoechst	nucleus	distribution	asymptote	asymptote	maximum response	maximum response	maximum response nucleus Hoechst distribution
381	1	pheno1	1	75.530566	6.867649052	72.4717	76.649286	c_nonborder_nucleus_symmetry_04_mean_per_well	nonborder_nucleus_symmetry_04_mean_per_well	c	H2AX	nucleus	distribution	asymptote	asymptote	maximum response	maximum response	maximum response nucleus H2AX distribution
382	1	pheno1	1	123.987211	6.355058034	122.127625	124.232786	c_nonborder_nucleus_symmetry_04_ser_bright_2_mean_per_well	nonborder_nucleus_symmetry_04_ser_bright_2_mean_per_well	c	Hoechst	nucleus	distribution	asymptote	asymptote	maximum response	maximum response	maximum response nucleus Hoechst distribution
383	1	pheno1	16	73.61594	6.497354645	72.697178	75.81165	c_nonborder_nucleus_symmetry_04_ser_bright_mean_per_well	nonborder_nucleus_symmetry_04_ser_bright_mean_per_well	c	H2AX	nucleus	distribution	asymptote	asymptote	NA	baseline	baseline nucleus H2AX distribution
384	1	pheno1	13	116.087344	6.578453294	112.25512	116.377985	c_nonborder_nucleus_symmetry_04_ser_dark_2_mean_per_well	nonborder_nucleus_symmetry_04_ser_dark_2_mean_per_well	c	Hoechst	nucleus	distribution	asymptote	asymptote	NA	baseline	baseline nucleus Hoechst distribution
385	1	pheno1	1	94.571561	6.30905407	4.446737	95.666574	c_nonborder_nucleus_symmetry_04_ser_dark_mean_per_well	nonborder_nucleus_symmetry_04_ser_dark_mean_per_well	c	H2AX	nucleus	distribution	asymptote	asymptote	NA	baseline	baseline nucleus H2AX distribution
386	1	pheno1	1	56.042782	5.968523182	15.439741	77.814836	c_nonborder_nucleus_symmetry_04_ser_edge_2_mean_per_well	nonborder_nucleus_symmetry_04_ser_edge_2_mean_per_well	c	Hoechst	nucleus	distribution	asymptote	asymptote	maximum response	maximum response	maximum response nucleus Hoechst distribution
387	1	pheno1	6	75.849056	8.912857399	73.587927	77.391392	c_nonborder_nucleus_symmetry_04_ser_edge_mean_per_well	nonborder_nucleus_symmetry_04_ser_edge_mean_per_well	c	H2AX	nucleus	distribution	asymptote	asymptote	maximum response	maximum response	maximum response nucleus H2AX distribution
388	1	pheno1	1	187.44893	7.813788017	184.826688	187.542393	c_nonborder_nucleus_symmetry_04_ser_hole_2_mean_per_well	nonborder_nucleus_symmetry_04_ser_hole_2_mean_per_well	c	Hoechst	nucleus	distribution	asymptote	asymptote	NA	baseline	baseline nucleus Hoechst distribution
389	1	pheno1	13	94.154493	6.239830437	91.37481	95.865463	c_nonborder_nucleus_symmetry_04_ser_hole_mean_per_well	nonborder_nucleus_symmetry_04_ser_hole_mean_per_well	c	H2AX	nucleus	distribution	asymptote	asymptote	NA	baseline	baseline nucleus H2AX distribution
390	1	pheno1	11	106.577837	5.797609084	102.148682	107.731536	c_nonborder_nucleus_symmetry_04_ser_ridge_2_mean_per_well	nonborder_nucleus_symmetry_04_ser_ridge_2_mean_per_well	c	Hoechst	nucleus	distribution	asymptote	asymptote	NA	baseline	baseline nucleus Hoechst distribution
391	1	pheno1	4	117.172518	6.335817825	30.273706	117.449893	c_nonborder_nucleus_symmetry_04_ser_ridge_mean_per_well	nonborder_nucleus_symmetry_04_ser_ridge_mean_per_well	c	H2AX	nucleus	distribution	asymptote	asymptote	NA	baseline	baseline nucleus H2AX distribution
392	1	pheno1	2	4.583659	6.874088268	4.249379	4.957054	c_nonborder_nucleus_symmetry_04_ser_saddle_2_mean_per_well	nonborder_nucleus_symmetry_04_ser_saddle_2_mean_per_well	c	Hoechst	nucleus	distribution	asymptote	asymptote	maximum response	maximum response	maximum response nucleus Hoechst distribution
393	1	pheno1	1	74.820416	5.884786576	73.977655	76.142789	c_nonborder_nucleus_symmetry_04_ser_saddle_mean_per_well	nonborder_nucleus_symmetry_04_ser_saddle_mean_per_well	c	H2AX	nucleus	distribution	asymptote	asymptote	NA	baseline	baseline nucleus H2AX distribution
394	1	pheno1	4	131.098306	6.251512532	130.858745	131.558485	c_nonborder_nucleus_symmetry_04_ser_spot_2_mean_per_well	nonborder_nucleus_symmetry_04_ser_spot_2_mean_per_well	c	Hoechst	nucleus	distribution	asymptote	asymptote	maximum response	maximum response	maximum response nucleus Hoechst distribution
395	1	pheno1	17	74.967934	6.412241255	44.439886	77.589572	c_nonborder_nucleus_symmetry_04_ser_spot_mean_per_well	nonborder_nucleus_symmetry_04_ser_spot_mean_per_well	c	H2AX	nucleus	distribution	asymptote	asymptote	NA	baseline	baseline nucleus H2AX distribution
396	1	pheno1	6	55.588951	7.543282109	54.797276	57.703657	c_nonborder_nucleus_symmetry_04_ser_valley_2_mean_per_well	nonborder_nucleus_symmetry_04_ser_valley_2_mean_per_well	c	Hoechst	nucleus	distribution	asymptote	asymptote	NA	baseline	baseline nucleus Hoechst distribution
397	1	pheno1	11	70.225286	6.35559654	69.562972	71.795411	c_nonborder_nucleus_symmetry_04_ser_valley_mean_per_well	nonborder_nucleus_symmetry_04_ser_valley_mean_per_well	c	H2AX	nucleus	distribution	asymptote	asymptote	NA	baseline	baseline nucleus H2AX distribution
398	1	pheno1	1	187.60001	6.077294811	72.823188	190.638596	c_nonborder_nucleus_symmetry_05_2_mean_per_well	nonborder_nucleus_symmetry_05_2_mean_per_well	c	Hoechst	nucleus	distribution	asymptote	asymptote	maximum response	maximum response	maximum response nucleus Hoechst distribution
399	1	pheno1	6	68.573987	7.469724133	64.02299	70.154691	c_nonborder_nucleus_symmetry_05_mean_per_well	nonborder_nucleus_symmetry_05_mean_per_well	c	H2AX	nucleus	distribution	asymptote	asymptote	NA	baseline	baseline nucleus H2AX distribution
400	1	pheno1	6	119.224126	6.338369032	117.422428	119.573219	c_nonborder_nucleus_symmetry_05_ser_bright_2_mean_per_well	nonborder_nucleus_symmetry_05_ser_bright_2_mean_per_well	c	Hoechst	nucleus	distribution	asymptote	asymptote	maximum response	maximum response	maximum response nucleus Hoechst distribution
401	1	pheno1	18	12.078769	8.713615093	6.324091	12.387209	c_nonborder_nucleus_symmetry_05_ser_bright_mean_per_well	nonborder_nucleus_symmetry_05_ser_bright_mean_per_well	c	H2AX	nucleus	distribution	asymptote	asymptote	NA	baseline	baseline nucleus H2AX distribution
402	1	pheno1	18	73.910929	6.488223118	7.878528	74.060931	c_nonborder_nucleus_symmetry_05_ser_dark_2_mean_per_well	nonborder_nucleus_symmetry_05_ser_dark_2_mean_per_well	c	Hoechst	nucleus	distribution	asymptote	asymptote	NA	baseline	baseline nucleus Hoechst distribution
403	1	pheno1	18	11.986717	6.206903553	4.692648	46.664494	c_nonborder_nucleus_symmetry_05_ser_dark_mean_per_well	nonborder_nucleus_symmetry_05_ser_dark_mean_per_well	c	H2AX	nucleus	distribution	asymptote	asymptote	NA	baseline	baseline nucleus H2AX distribution
404	1	pheno1	X	165.099603	5.764344691	159.02561	166.33786	c_nonborder_nucleus_symmetry_05_ser_edge_2_mean_per_well	nonborder_nucleus_symmetry_05_ser_edge_2_mean_per_well	c	Hoechst	nucleus	distribution	asymptote	asymptote	maximum response	maximum response	maximum response nucleus Hoechst distribution
405	1	pheno1	16	69.856675	6.565034148	23.313839	96.131866	c_nonborder_nucleus_symmetry_05_ser_edge_mean_per_well	nonborder_nucleus_symmetry_05_ser_edge_mean_per_well	c	H2AX	nucleus	distribution	asymptote	asymptote	maximum response	maximum response	maximum response nucleus H2AX distribution
406	1	pheno1	3	20.104096	7.17132109	19.656318	21.804423	c_nonborder_nucleus_symmetry_05_ser_hole_2_mean_per_well	nonborder_nucleus_symmetry_05_ser_hole_2_mean_per_well	c	Hoechst	nucleus	distribution	asymptote	asymptote	NA	baseline	baseline nucleus Hoechst distribution
407	1	pheno1	18	11.946322	6.139841695	4.790008	38.898122	c_nonborder_nucleus_symmetry_05_ser_hole_mean_per_well	nonborder_nucleus_symmetry_05_ser_hole_mean_per_well	c	H2AX	nucleus	distribution	asymptote	asymptote	NA	baseline	baseline nucleus H2AX distribution
408	1	pheno1	1	91.003529	5.452304497	75.361787	156.238	c_nonborder_nucleus_symmetry_05_ser_ridge_2_mean_per_well	nonborder_nucleus_symmetry_05_ser_ridge_2_mean_per_well	c	Hoechst	nucleus	distribution	asymptote	asymptote	maximum response	maximum response	maximum response nucleus Hoechst distribution
409	1	pheno1	2	148.578178	6.917700487	138.419383	150.402278	c_nonborder_nucleus_symmetry_05_ser_ridge_mean_per_well	nonborder_nucleus_symmetry_05_ser_ridge_mean_per_well	c	H2AX	nucleus	distribution	asymptote	asymptote	NA	baseline	baseline nucleus H2AX distribution
410	1	pheno1	16	36.727507	6.613219368	31.063567	51.278176	c_nonborder_nucleus_symmetry_05_ser_saddle_2_mean_per_well	nonborder_nucleus_symmetry_05_ser_saddle_2_mean_per_well	c	Hoechst	nucleus	distribution	asymptote	asymptote	maximum response	maximum response	maximum response nucleus Hoechst distribution
411	1	pheno1	7	57.509003	5.538179536	40.330306	99.971411	c_nonborder_nucleus_symmetry_05_ser_saddle_mean_per_well	nonborder_nucleus_symmetry_05_ser_saddle_mean_per_well	c	H2AX	nucleus	distribution	asymptote	asymptote	NA	baseline	baseline nucleus H2AX distribution
412	1	pheno1	8	103.492425	7.057895374	89.262703	104.369104	c_nonborder_nucleus_symmetry_05_ser_spot_2_mean_per_well	nonborder_nucleus_symmetry_05_ser_spot_2_mean_per_well	c	Hoechst	nucleus	distribution	asymptote	asymptote	maximum response	maximum response	maximum response nucleus Hoechst distribution
413	1	pheno1	18	11.946322	6.732395682	5.264642	34.050802	c_nonborder_nucleus_symmetry_05_ser_spot_mean_per_well	nonborder_nucleus_symmetry_05_ser_spot_mean_per_well	c	H2AX	nucleus	distribution	asymptote	asymptote	NA	baseline	baseline nucleus H2AX distribution
414	1	pheno1	17	87.591612	6.50358541	87.315083	88.576366	c_nonborder_nucleus_symmetry_05_ser_valley_2_mean_per_well	nonborder_nucleus_symmetry_05_ser_valley_2_mean_per_well	c	Hoechst	nucleus	distribution	asymptote	asymptote	NA	baseline	baseline nucleus Hoechst distribution
415	1	pheno1	13	94.894394	7.235987348	94.476908	95.386509	c_nonborder_nucleus_symmetry_05_ser_valley_mean_per_well	nonborder_nucleus_symmetry_05_ser_valley_mean_per_well	c	H2AX	nucleus	distribution	asymptote	asymptote	NA	baseline	baseline nucleus H2AX distribution
416	1	pheno1	16	46.914063	6.486168996	44.755107	51.353741	c_nonborder_nucleus_symmetry_12_2_mean_per_well	nonborder_nucleus_symmetry_12_2_mean_per_well	c	Hoechst	nucleus	distribution	asymptote	asymptote	maximum response	maximum response	maximum response nucleus Hoechst distribution
417	1	pheno1	16	46.03045	6.981286689	45.685367	48.19071	c_nonborder_nucleus_symmetry_12_mean_per_well	nonborder_nucleus_symmetry_12_mean_per_well	c	H2AX	nucleus	distribution	asymptote	asymptote	maximum response	maximum response	maximum response nucleus H2AX distribution
418	1	pheno1	10	120.767026	5.510197692	43.777842	120.893928	c_nonborder_nucleus_symmetry_12_ser_bright_2_mean_per_well	nonborder_nucleus_symmetry_12_ser_bright_2_mean_per_well	c	Hoechst	nucleus	distribution	asymptote	asymptote	maximum response	maximum response	maximum response nucleus Hoechst distribution
419	1	pheno1	15	27.411875	5.906217181	27.40518	28.287832	c_nonborder_nucleus_symmetry_12_ser_bright_mean_per_well	nonborder_nucleus_symmetry_12_ser_bright_mean_per_well	c	H2AX	nucleus	distribution	asymptote	asymptote	maximum response	maximum response	maximum response nucleus H2AX distribution
420	1	pheno1	15	36.340422	6.046492833	36.057489	36.454228	c_nonborder_nucleus_symmetry_12_ser_dark_2_mean_per_well	nonborder_nucleus_symmetry_12_ser_dark_2_mean_per_well	c	Hoechst	nucleus	distribution	asymptote	asymptote	maximum response	maximum response	maximum response nucleus Hoechst distribution
421	1	pheno1	1	84.142411	6.3991177	46.814199	86.712806	c_nonborder_nucleus_symmetry_12_ser_dark_mean_per_well	nonborder_nucleus_symmetry_12_ser_dark_mean_per_well	c	H2AX	nucleus	distribution	asymptote	asymptote	maximum response	maximum response	maximum response nucleus H2AX distribution
422	1	pheno1	14	102.811915	5.881266417	99.891218	103.621889	c_nonborder_nucleus_symmetry_12_ser_edge_2_mean_per_well	nonborder_nucleus_symmetry_12_ser_edge_2_mean_per_well	c	Hoechst	nucleus	distribution	asymptote	asymptote	maximum response	maximum response	maximum response nucleus Hoechst distribution
423	1	pheno1	8	61.429415	5.750455463	37.691478	121.539626	c_nonborder_nucleus_symmetry_12_ser_edge_mean_per_well	nonborder_nucleus_symmetry_12_ser_edge_mean_per_well	c	H2AX	nucleus	distribution	asymptote	asymptote	maximum response	maximum response	maximum response nucleus H2AX distribution
424	1	pheno1	11	81.272897	6.432275849	80.884764	81.599714	c_nonborder_nucleus_symmetry_12_ser_hole_2_mean_per_well	nonborder_nucleus_symmetry_12_ser_hole_2_mean_per_well	c	Hoechst	nucleus	distribution	asymptote	asymptote	NA	baseline	baseline nucleus Hoechst distribution
425	1	pheno1	6	33.63439	5.374947117	33.232465	95.408553	c_nonborder_nucleus_symmetry_12_ser_hole_mean_per_well	nonborder_nucleus_symmetry_12_ser_hole_mean_per_well	c	H2AX	nucleus	distribution	asymptote	asymptote	NA	baseline	baseline nucleus H2AX distribution
426	1	pheno1	16	45.774525	6.723320724	45.657531	48.596708	c_nonborder_nucleus_symmetry_12_ser_ridge_2_mean_per_well	nonborder_nucleus_symmetry_12_ser_ridge_2_mean_per_well	c	Hoechst	nucleus	distribution	asymptote	asymptote	maximum response	maximum response	maximum response nucleus Hoechst distribution
427	1	pheno1	14	103.112649	6.146222369	102.304352	103.614448	c_nonborder_nucleus_symmetry_12_ser_ridge_mean_per_well	nonborder_nucleus_symmetry_12_ser_ridge_mean_per_well	c	H2AX	nucleus	distribution	asymptote	asymptote	maximum response	maximum response	maximum response nucleus H2AX distribution
428	1	pheno1	11	84.083889	6.172891609	82.613938	90.853571	c_nonborder_nucleus_symmetry_12_ser_saddle_2_mean_per_well	nonborder_nucleus_symmetry_12_ser_saddle_2_mean_per_well	c	Hoechst	nucleus	distribution	asymptote	asymptote	maximum response	maximum response	maximum response nucleus Hoechst distribution
429	1	pheno1	11	84.089641	6.552874918	82.420167	88.137229	c_nonborder_nucleus_symmetry_12_ser_saddle_mean_per_well	nonborder_nucleus_symmetry_12_ser_saddle_mean_per_well	c	H2AX	nucleus	distribution	asymptote	asymptote	maximum response	maximum response	maximum response nucleus H2AX distribution
430	1	pheno1	4	68.811598	6.32420803	68.543136	80.390144	c_nonborder_nucleus_symmetry_12_ser_spot_2_mean_per_well	nonborder_nucleus_symmetry_12_ser_spot_2_mean_per_well	c	Hoechst	nucleus	distribution	asymptote	asymptote	maximum response	maximum response	maximum response nucleus Hoechst distribution
431	1	pheno1	16	44.847329	6.056440592	44.728275	48.596708	c_nonborder_nucleus_symmetry_12_ser_spot_mean_per_well	nonborder_nucleus_symmetry_12_ser_spot_mean_per_well	c	H2AX	nucleus	distribution	asymptote	asymptote	NA	baseline	baseline nucleus H2AX distribution
432	1	pheno1	15	36.192092	6.275940785	36.02505	36.504829	c_nonborder_nucleus_symmetry_12_ser_valley_2_mean_per_well	nonborder_nucleus_symmetry_12_ser_valley_2_mean_per_well	c	Hoechst	nucleus	distribution	asymptote	asymptote	maximum response	maximum response	maximum response nucleus Hoechst distribution
433	1	pheno1	16	51.501959	6.630503367	51.052708	51.618176	c_nonborder_nucleus_symmetry_12_ser_valley_mean_per_well	nonborder_nucleus_symmetry_12_ser_valley_mean_per_well	c	H2AX	nucleus	distribution	asymptote	asymptote	maximum response	maximum response	maximum response nucleus H2AX distribution
434	1	pheno1	15	96.476564	6.095978926	94.676032	97.534936	c_nonborder_nucleus_symmetry_13_2_mean_per_well	nonborder_nucleus_symmetry_13_2_mean_per_well	c	Hoechst	nucleus	distribution	asymptote	asymptote	NA	baseline	baseline nucleus Hoechst distribution
435	1	pheno1	5	102.03721	5.921722393	45.232397	103.24587	c_nonborder_nucleus_symmetry_13_ser_bright_2_mean_per_well	nonborder_nucleus_symmetry_13_ser_bright_2_mean_per_well	c	Hoechst	nucleus	distribution	asymptote	asymptote	NA	baseline	baseline nucleus Hoechst distribution
436	1	pheno1	12	117.787391	5.969822224	81.222556	118.117881	c_nonborder_nucleus_symmetry_13_ser_bright_mean_per_well	nonborder_nucleus_symmetry_13_ser_bright_mean_per_well	c	H2AX	nucleus	distribution	asymptote	asymptote	NA	baseline	baseline nucleus H2AX distribution
437	1	pheno1	15	97.657322	8.066995823	97.602291	97.762938	c_nonborder_nucleus_symmetry_13_ser_dark_2_mean_per_well	nonborder_nucleus_symmetry_13_ser_dark_2_mean_per_well	c	Hoechst	nucleus	distribution	asymptote	asymptote	maximum response	maximum response	maximum response nucleus Hoechst distribution
438	1	pheno1	14	118.614458	6.67018031	118.35231	119.366544	c_nonborder_nucleus_symmetry_13_ser_dark_mean_per_well	nonborder_nucleus_symmetry_13_ser_dark_mean_per_well	c	H2AX	nucleus	distribution	asymptote	asymptote	NA	baseline	baseline nucleus H2AX distribution
439	1	pheno1	9	50.798354	8.933230795	50.664141	51.34255	c_nonborder_nucleus_symmetry_13_ser_edge_2_mean_per_well	nonborder_nucleus_symmetry_13_ser_edge_2_mean_per_well	c	Hoechst	nucleus	distribution	asymptote	asymptote	maximum response	maximum response	maximum response nucleus Hoechst distribution
440	1	pheno1	1	180.418063	7.182254684	179.921674	180.542147	c_nonborder_nucleus_symmetry_13_ser_edge_mean_per_well	nonborder_nucleus_symmetry_13_ser_edge_mean_per_well	c	H2AX	nucleus	distribution	asymptote	asymptote	maximum response	maximum response	maximum response nucleus H2AX distribution
441	1	pheno1	3	20.456899	7.389289253	19.656318	21.351819	c_nonborder_nucleus_symmetry_13_ser_hole_2_mean_per_well	nonborder_nucleus_symmetry_13_ser_hole_2_mean_per_well	c	Hoechst	nucleus	distribution	asymptote	asymptote	NA	baseline	baseline nucleus Hoechst distribution
442	1	pheno1	1	187.882206	6.371790864	185.618243	188.086882	c_nonborder_nucleus_symmetry_13_ser_hole_mean_per_well	nonborder_nucleus_symmetry_13_ser_hole_mean_per_well	c	H2AX	nucleus	distribution	asymptote	asymptote	NA	baseline	baseline nucleus H2AX distribution
443	1	pheno1	16	78.6425	5.937536407	23.35124	85.209886	c_nonborder_nucleus_symmetry_13_ser_ridge_2_mean_per_well	nonborder_nucleus_symmetry_13_ser_ridge_2_mean_per_well	c	Hoechst	nucleus	distribution	asymptote	asymptote	NA	baseline	baseline nucleus Hoechst distribution
444	1	pheno1	1	185.688601	6.026337971	32.869086	187.521049	c_nonborder_nucleus_symmetry_13_ser_ridge_mean_per_well	nonborder_nucleus_symmetry_13_ser_ridge_mean_per_well	c	H2AX	nucleus	distribution	asymptote	asymptote	NA	baseline	baseline nucleus H2AX distribution
445	1	pheno1	17	64.580892	6.331303992	62.972474	86.119818	c_nonborder_nucleus_symmetry_13_ser_saddle_2_mean_per_well	nonborder_nucleus_symmetry_13_ser_saddle_2_mean_per_well	c	Hoechst	nucleus	distribution	asymptote	asymptote	maximum response	maximum response	maximum response nucleus Hoechst distribution
446	1	pheno1	4	149.940037	5.673887204	100.560711	151.247789	c_nonborder_nucleus_symmetry_13_ser_saddle_mean_per_well	nonborder_nucleus_symmetry_13_ser_saddle_mean_per_well	c	H2AX	nucleus	distribution	asymptote	asymptote	NA	baseline	baseline nucleus H2AX distribution
447	1	pheno1	16	79.630849	6.689863222	32.869015	85.209886	c_nonborder_nucleus_symmetry_13_ser_spot_2_mean_per_well	nonborder_nucleus_symmetry_13_ser_spot_2_mean_per_well	c	Hoechst	nucleus	distribution	asymptote	asymptote	NA	baseline	baseline nucleus Hoechst distribution
448	1	pheno1	1	186.838419	7.4719935	185.640882	187.521049	c_nonborder_nucleus_symmetry_13_ser_spot_mean_per_well	nonborder_nucleus_symmetry_13_ser_spot_mean_per_well	c	H2AX	nucleus	distribution	asymptote	asymptote	NA	baseline	baseline nucleus H2AX distribution
449	1	pheno1	7	131.050902	7.422994948	130.177657	131.354118	c_nonborder_nucleus_symmetry_13_ser_valley_2_mean_per_well	nonborder_nucleus_symmetry_13_ser_valley_2_mean_per_well	c	Hoechst	nucleus	distribution	asymptote	asymptote	maximum response	maximum response	maximum response nucleus Hoechst distribution
450	1	pheno1	7	44.998808	6.721018067	40.363271	59.223835	c_nonborder_nucleus_symmetry_13_ser_valley_mean_per_well	nonborder_nucleus_symmetry_13_ser_valley_mean_per_well	c	H2AX	nucleus	distribution	asymptote	asymptote	NA	baseline	baseline nucleus H2AX distribution
451	1	pheno1	15	94.326317	6.644418531	94.146092	94.544784	c_nonborder_nucleus_symmetry_14_2_mean_per_well	nonborder_nucleus_symmetry_14_2_mean_per_well	c	Hoechst	nucleus	distribution	asymptote	asymptote	maximum response	maximum response	maximum response nucleus Hoechst distribution
452	1	pheno1	14	99.990725	6.655839953	99.602576	103.550948	c_nonborder_nucleus_symmetry_14_mean_per_well	nonborder_nucleus_symmetry_14_mean_per_well	c	H2AX	nucleus	distribution	asymptote	asymptote	maximum response	maximum response	maximum response nucleus H2AX distribution
453	1	pheno1	14	63.039849	6.203415388	61.775168	120.318629	c_nonborder_nucleus_symmetry_14_ser_bright_2_mean_per_well	nonborder_nucleus_symmetry_14_ser_bright_2_mean_per_well	c	Hoechst	nucleus	distribution	asymptote	asymptote	NA	baseline	baseline nucleus Hoechst distribution
454	1	pheno1	13	113.968606	6.343680298	15.893145	114.960174	c_nonborder_nucleus_symmetry_14_ser_bright_mean_per_well	nonborder_nucleus_symmetry_14_ser_bright_mean_per_well	c	H2AX	nucleus	distribution	asymptote	asymptote	NA	baseline	baseline nucleus H2AX distribution
455	1	pheno1	6	94.746355	5.846258371	93.60388	95.448423	c_nonborder_nucleus_symmetry_14_ser_dark_2_mean_per_well	nonborder_nucleus_symmetry_14_ser_dark_2_mean_per_well	c	Hoechst	nucleus	distribution	asymptote	asymptote	maximum response	maximum response	maximum response nucleus Hoechst distribution
456	1	pheno1	7	37.852873	5.878022518	37.548963	50.617637	c_nonborder_nucleus_symmetry_14_ser_dark_mean_per_well	nonborder_nucleus_symmetry_14_ser_dark_mean_per_well	c	H2AX	nucleus	distribution	asymptote	asymptote	NA	baseline	baseline nucleus H2AX distribution
457	1	pheno1	16	51.22761	5.757146049	44.667258	88.47988	c_nonborder_nucleus_symmetry_14_ser_edge_2_mean_per_well	nonborder_nucleus_symmetry_14_ser_edge_2_mean_per_well	c	Hoechst	nucleus	distribution	asymptote	asymptote	maximum response	maximum response	maximum response nucleus Hoechst distribution
458	1	pheno1	11	58.195585	6.390298677	56.922934	59.10096	c_nonborder_nucleus_symmetry_14_ser_edge_mean_per_well	nonborder_nucleus_symmetry_14_ser_edge_mean_per_well	c	H2AX	nucleus	distribution	asymptote	asymptote	maximum response	maximum response	maximum response nucleus H2AX distribution
459	1	pheno1	1	185.640882	7.373816846	184.826688	187.521049	c_nonborder_nucleus_symmetry_14_ser_hole_2_mean_per_well	nonborder_nucleus_symmetry_14_ser_hole_2_mean_per_well	c	Hoechst	nucleus	distribution	asymptote	asymptote	NA	baseline	baseline nucleus Hoechst distribution
460	1	pheno1	13	92.851386	7.323365223	91.37481	94.15918	c_nonborder_nucleus_symmetry_14_ser_hole_mean_per_well	nonborder_nucleus_symmetry_14_ser_hole_mean_per_well	c	H2AX	nucleus	distribution	asymptote	asymptote	NA	baseline	baseline nucleus H2AX distribution
461	1	pheno1	1	78.545801	6.536948485	75.37697	161.288097	c_nonborder_nucleus_symmetry_14_ser_ridge_2_mean_per_well	nonborder_nucleus_symmetry_14_ser_ridge_2_mean_per_well	c	Hoechst	nucleus	distribution	asymptote	asymptote	NA	baseline	baseline nucleus Hoechst distribution
462	1	pheno1	13	20.591404	6.541665539	16.03886	115.469561	c_nonborder_nucleus_symmetry_14_ser_ridge_mean_per_well	nonborder_nucleus_symmetry_14_ser_ridge_mean_per_well	c	H2AX	nucleus	distribution	asymptote	asymptote	NA	baseline	baseline nucleus H2AX distribution
463	1	pheno1	16	50.348943	6.797051434	44.774584	51.586223	c_nonborder_nucleus_symmetry_14_ser_saddle_2_mean_per_well	nonborder_nucleus_symmetry_14_ser_saddle_2_mean_per_well	c	Hoechst	nucleus	distribution	asymptote	asymptote	maximum response	maximum response	maximum response nucleus Hoechst distribution
464	1	pheno1	16	36.727507	5.494103297	36.497892	48.183049	c_nonborder_nucleus_symmetry_14_ser_saddle_mean_per_well	nonborder_nucleus_symmetry_14_ser_saddle_mean_per_well	c	H2AX	nucleus	distribution	asymptote	asymptote	maximum response	maximum response	maximum response nucleus H2AX distribution
465	1	pheno1	15	95.278201	6.362255944	94.765492	95.679082	c_nonborder_nucleus_symmetry_14_ser_spot_2_mean_per_well	nonborder_nucleus_symmetry_14_ser_spot_2_mean_per_well	c	Hoechst	nucleus	distribution	asymptote	asymptote	NA	baseline	baseline nucleus Hoechst distribution
466	1	pheno1	16	73.095527	6.845368669	72.615447	79.080262	c_nonborder_nucleus_symmetry_14_ser_spot_mean_per_well	nonborder_nucleus_symmetry_14_ser_spot_mean_per_well	c	H2AX	nucleus	distribution	asymptote	asymptote	NA	baseline	baseline nucleus H2AX distribution
467	1	pheno1	18	12.378399	6.895844634	10.93191	13.295178	c_nonborder_nucleus_symmetry_14_ser_valley_2_mean_per_well	nonborder_nucleus_symmetry_14_ser_valley_2_mean_per_well	c	Hoechst	nucleus	distribution	asymptote	asymptote	maximum response	maximum response	maximum response nucleus Hoechst distribution
468	1	pheno1	16	36.351035	6.554066968	35.252613	76.565018	c_nonborder_nucleus_symmetry_14_ser_valley_mean_per_well	nonborder_nucleus_symmetry_14_ser_valley_mean_per_well	c	H2AX	nucleus	distribution	asymptote	asymptote	maximum response	maximum response	maximum response nucleus H2AX distribution
469	1	pheno1	1	190.603488	7.155514286	190.399067	191.204535	c_nonborder_nucleus_symmetry_15_2_mean_per_well	nonborder_nucleus_symmetry_15_2_mean_per_well	c	Hoechst	nucleus	distribution	asymptote	asymptote	maximum response	maximum response	maximum response nucleus Hoechst distribution
470	1	pheno1	2	126.172797	6.477182107	123.762352	131.600753	c_nonborder_nucleus_symmetry_15_mean_per_well	nonborder_nucleus_symmetry_15_mean_per_well	c	H2AX	nucleus	distribution	asymptote	asymptote	maximum response	maximum response	maximum response nucleus H2AX distribution
471	1	pheno1	13	83.781116	8.709102356	83.778845	83.870221	c_nonborder_nucleus_symmetry_15_ser_bright_2_mean_per_well	nonborder_nucleus_symmetry_15_ser_bright_2_mean_per_well	c	Hoechst	nucleus	distribution	asymptote	asymptote	NA	baseline	baseline nucleus Hoechst distribution
472	1	pheno1	1	186.677321	6.743405943	129.611214	187.521049	c_nonborder_nucleus_symmetry_15_ser_bright_mean_per_well	nonborder_nucleus_symmetry_15_ser_bright_mean_per_well	c	H2AX	nucleus	distribution	asymptote	asymptote	NA	baseline	baseline nucleus H2AX distribution
473	1	pheno1	18	12.826038	6.449063653	5.155741	74.55567	c_nonborder_nucleus_symmetry_15_ser_dark_2_mean_per_well	nonborder_nucleus_symmetry_15_ser_dark_2_mean_per_well	c	Hoechst	nucleus	distribution	asymptote	asymptote	NA	baseline	baseline nucleus Hoechst distribution
474	1	pheno1	14	119.296114	6.029863519	115.119975	119.390137	c_nonborder_nucleus_symmetry_15_ser_dark_mean_per_well	nonborder_nucleus_symmetry_15_ser_dark_mean_per_well	c	H2AX	nucleus	distribution	asymptote	asymptote	NA	baseline	baseline nucleus H2AX distribution
475	1	pheno1	16	16.359085	5.619740208	13.04521	88.317908	c_nonborder_nucleus_symmetry_15_ser_edge_2_mean_per_well	nonborder_nucleus_symmetry_15_ser_edge_2_mean_per_well	c	Hoechst	nucleus	distribution	asymptote	asymptote	maximum response	maximum response	maximum response nucleus Hoechst distribution
476	1	pheno1	12	11.570603	7.428360971	10.552383	12.000566	c_nonborder_nucleus_symmetry_15_ser_edge_mean_per_well	nonborder_nucleus_symmetry_15_ser_edge_mean_per_well	c	H2AX	nucleus	distribution	asymptote	asymptote	maximum response	maximum response	maximum response nucleus H2AX distribution
477	1	pheno1	3	20.456899	6.82065501	19.656318	79.56748	c_nonborder_nucleus_symmetry_15_ser_hole_2_mean_per_well	nonborder_nucleus_symmetry_15_ser_hole_2_mean_per_well	c	Hoechst	nucleus	distribution	asymptote	asymptote	NA	baseline	baseline nucleus Hoechst distribution
478	1	pheno1	18	11.946322	6.249815995	5.155741	12.387209	c_nonborder_nucleus_symmetry_15_ser_hole_mean_per_well	nonborder_nucleus_symmetry_15_ser_hole_mean_per_well	c	H2AX	nucleus	distribution	asymptote	asymptote	NA	baseline	baseline nucleus H2AX distribution
479	1	pheno1	16	80.154586	7.239884487	78.630676	80.881391	c_nonborder_nucleus_symmetry_15_ser_ridge_2_mean_per_well	nonborder_nucleus_symmetry_15_ser_ridge_2_mean_per_well	c	Hoechst	nucleus	distribution	asymptote	asymptote	NA	baseline	baseline nucleus Hoechst distribution
480	1	pheno1	10	108.742506	6.077181622	107.483788	110.006216	c_nonborder_nucleus_symmetry_15_ser_ridge_mean_per_well	nonborder_nucleus_symmetry_15_ser_ridge_mean_per_well	c	H2AX	nucleus	distribution	asymptote	asymptote	NA	baseline	baseline nucleus H2AX distribution
481	1	pheno1	1	22.578938	6.414216236	22.249794	191.44452	c_nonborder_nucleus_symmetry_15_ser_saddle_2_mean_per_well	nonborder_nucleus_symmetry_15_ser_saddle_2_mean_per_well	c	Hoechst	nucleus	distribution	asymptote	asymptote	maximum response	maximum response	maximum response nucleus Hoechst distribution
482	1	pheno1	13	46.749793	6.650097408	45.865733	47.481387	c_nonborder_nucleus_symmetry_15_ser_saddle_mean_per_well	nonborder_nucleus_symmetry_15_ser_saddle_mean_per_well	c	H2AX	nucleus	distribution	asymptote	asymptote	NA	baseline	baseline nucleus H2AX distribution
483	1	pheno1	12	27.610043	7.50835026	27.562385	28.414992	c_nonborder_nucleus_symmetry_15_ser_spot_2_mean_per_well	nonborder_nucleus_symmetry_15_ser_spot_2_mean_per_well	c	Hoechst	nucleus	distribution	asymptote	asymptote	maximum response	maximum response	maximum response nucleus Hoechst distribution
484	1	pheno1	1	186.838419	6.877913211	185.618243	187.521049	c_nonborder_nucleus_symmetry_15_ser_spot_mean_per_well	nonborder_nucleus_symmetry_15_ser_spot_mean_per_well	c	H2AX	nucleus	distribution	asymptote	asymptote	NA	baseline	baseline nucleus H2AX distribution
485	1	pheno1	6	48.927234	5.857227753	48.830515	50.416979	c_nonborder_nucleus_symmetry_15_ser_valley_2_mean_per_well	nonborder_nucleus_symmetry_15_ser_valley_2_mean_per_well	c	Hoechst	nucleus	distribution	asymptote	asymptote	maximum response	maximum response	maximum response nucleus Hoechst distribution
486	1	pheno1	X	126.668641	7.844250756	124.209589	129.844516	c_nonborder_nucleus_symmetry_15_ser_valley_mean_per_well	nonborder_nucleus_symmetry_15_ser_valley_mean_per_well	c	H2AX	nucleus	distribution	asymptote	asymptote	NA	baseline	baseline nucleus H2AX distribution
487	1	pheno1	12	107.888737	6.228811422	39.934779	109.527908	c_nonborder_nucleus_threshold_compactness_30_percent_2_mean_per_well	nonborder_nucleus_threshold_compactness_30_percent_2_mean_per_well	c	Hoechst	nucleus	compactness	asymptote	asymptote	NA	baseline	baseline nucleus Hoechst compactness
488	1	pheno1	12	29.973047	6.602333819	29.341405	101.342165	c_nonborder_nucleus_threshold_compactness_30_percent_mean_per_well	nonborder_nucleus_threshold_compactness_30_percent_mean_per_well	c	H2AX	nucleus	compactness	asymptote	asymptote	NA	baseline	baseline nucleus H2AX compactness
489	1	pheno1	5	48.899102	6.539240152	19.017927	51.370231	c_nonborder_nucleus_threshold_compactness_30_percent_ser_bright_2_mean_per_well	nonborder_nucleus_threshold_compactness_30_percent_ser_bright_2_mean_per_well	c	Hoechst	nucleus	compactness	asymptote	asymptote	NA	baseline	baseline nucleus Hoechst compactness
490	1	pheno1	8	45.988953	6.574547503	43.384439	46.47344	c_nonborder_nucleus_threshold_compactness_30_percent_ser_bright_mean_per_well	nonborder_nucleus_threshold_compactness_30_percent_ser_bright_mean_per_well	c	H2AX	nucleus	compactness	asymptote	asymptote	NA	baseline	baseline nucleus H2AX compactness
491	1	pheno1	3	19.729641	7.483826533	17.258259	21.222782	c_nonborder_nucleus_threshold_compactness_30_percent_ser_dark_2_mean_per_well	nonborder_nucleus_threshold_compactness_30_percent_ser_dark_2_mean_per_well	c	Hoechst	nucleus	compactness	asymptote	asymptote	NA	baseline	baseline nucleus Hoechst compactness
492	1	pheno1	7	87.539922	7.279250823	81.460577	89.514184	c_nonborder_nucleus_threshold_compactness_30_percent_ser_dark_mean_per_well	nonborder_nucleus_threshold_compactness_30_percent_ser_dark_mean_per_well	c	H2AX	nucleus	compactness	asymptote	asymptote	NA	baseline	baseline nucleus H2AX compactness
493	1	pheno1	5	48.556045	6.866455249	19.414865	51.188182	c_nonborder_nucleus_threshold_compactness_30_percent_ser_edge_2_mean_per_well	nonborder_nucleus_threshold_compactness_30_percent_ser_edge_2_mean_per_well	c	Hoechst	nucleus	compactness	asymptote	asymptote	NA	baseline	baseline nucleus Hoechst compactness
494	1	pheno1	12	4.625137	6.808654758	3.0327	5.305331	c_nonborder_nucleus_threshold_compactness_30_percent_ser_edge_mean_per_well	nonborder_nucleus_threshold_compactness_30_percent_ser_edge_mean_per_well	c	H2AX	nucleus	compactness	asymptote	asymptote	NA	baseline	baseline nucleus H2AX compactness
495	1	pheno1	3	20.104096	6.07905797	17.007925	123.395273	c_nonborder_nucleus_threshold_compactness_30_percent_ser_hole_2_mean_per_well	nonborder_nucleus_threshold_compactness_30_percent_ser_hole_2_mean_per_well	c	Hoechst	nucleus	compactness	asymptote	asymptote	NA	baseline	baseline nucleus Hoechst compactness
496	1	pheno1	5	126.184075	6.348539592	126.044229	126.64076	c_nonborder_nucleus_threshold_compactness_30_percent_ser_hole_mean_per_well	nonborder_nucleus_threshold_compactness_30_percent_ser_hole_mean_per_well	c	H2AX	nucleus	compactness	asymptote	asymptote	NA	baseline	baseline nucleus H2AX compactness
497	1	pheno1	5	44.714531	6.78244513	43.166427	48.992	c_nonborder_nucleus_threshold_compactness_30_percent_ser_ridge_2_mean_per_well	nonborder_nucleus_threshold_compactness_30_percent_ser_ridge_2_mean_per_well	c	Hoechst	nucleus	compactness	asymptote	asymptote	NA	baseline	baseline nucleus Hoechst compactness
498	1	pheno1	1	65.549749	6.532136449	65.145345	66.309523	c_nonborder_nucleus_threshold_compactness_30_percent_ser_ridge_mean_per_well	nonborder_nucleus_threshold_compactness_30_percent_ser_ridge_mean_per_well	c	H2AX	nucleus	compactness	asymptote	asymptote	NA	baseline	baseline nucleus H2AX compactness
499	1	pheno1	3	143.589308	6.068966512	18.143037	143.599843	c_nonborder_nucleus_threshold_compactness_30_percent_ser_saddle_2_mean_per_well	nonborder_nucleus_threshold_compactness_30_percent_ser_saddle_2_mean_per_well	c	Hoechst	nucleus	compactness	asymptote	asymptote	NA	baseline	baseline nucleus Hoechst compactness
500	1	pheno1	18	11.947521	7.521621399	5.70076	13.126926	c_nonborder_nucleus_threshold_compactness_30_percent_ser_saddle_mean_per_well	nonborder_nucleus_threshold_compactness_30_percent_ser_saddle_mean_per_well	c	H2AX	nucleus	compactness	asymptote	asymptote	NA	baseline	baseline nucleus H2AX compactness
501	1	pheno1	5	19.430188	5.935621445	18.906148	94.527836	c_nonborder_nucleus_threshold_compactness_30_percent_ser_spot_2_mean_per_well	nonborder_nucleus_threshold_compactness_30_percent_ser_spot_2_mean_per_well	c	Hoechst	nucleus	compactness	asymptote	asymptote	NA	baseline	baseline nucleus Hoechst compactness
502	1	pheno1	8	45.991701	6.999774184	45.65148	46.47344	c_nonborder_nucleus_threshold_compactness_30_percent_ser_spot_mean_per_well	nonborder_nucleus_threshold_compactness_30_percent_ser_spot_mean_per_well	c	H2AX	nucleus	compactness	asymptote	asymptote	NA	baseline	baseline nucleus H2AX compactness
503	1	pheno1	3	19.729641	7.397830741	17.230305	21.150754	c_nonborder_nucleus_threshold_compactness_30_percent_ser_valley_2_mean_per_well	nonborder_nucleus_threshold_compactness_30_percent_ser_valley_2_mean_per_well	c	Hoechst	nucleus	compactness	asymptote	asymptote	NA	baseline	baseline nucleus Hoechst compactness
504	1	pheno1	18	11.946322	6.501236446	5.70076	12.387209	c_nonborder_nucleus_threshold_compactness_30_percent_ser_valley_mean_per_well	nonborder_nucleus_threshold_compactness_30_percent_ser_valley_mean_per_well	c	H2AX	nucleus	compactness	asymptote	asymptote	NA	baseline	baseline nucleus H2AX compactness
505	1	pheno1	5	48.556045	7.102604048	45.597065	51.206134	c_nonborder_nucleus_threshold_compactness_40_percent_2_mean_per_well	nonborder_nucleus_threshold_compactness_40_percent_2_mean_per_well	c	Hoechst	nucleus	compactness	asymptote	asymptote	NA	baseline	baseline nucleus Hoechst compactness
506	1	pheno1	6	19.170406	7.361165503	16.019738	98.327023	c_nonborder_nucleus_threshold_compactness_40_percent_mean_per_well	nonborder_nucleus_threshold_compactness_40_percent_mean_per_well	c	H2AX	nucleus	compactness	asymptote	asymptote	NA	baseline	baseline nucleus H2AX compactness
507	1	pheno1	5	19.546347	8.081834459	19.166554	21.663272	c_nonborder_nucleus_threshold_compactness_40_percent_ser_bright_2_mean_per_well	nonborder_nucleus_threshold_compactness_40_percent_ser_bright_2_mean_per_well	c	Hoechst	nucleus	compactness	asymptote	asymptote	NA	baseline	baseline nucleus Hoechst compactness
508	1	pheno1	13	68.684322	6.352437554	3.984823	69.12554	c_nonborder_nucleus_threshold_compactness_40_percent_ser_bright_mean_per_well	nonborder_nucleus_threshold_compactness_40_percent_ser_bright_mean_per_well	c	H2AX	nucleus	compactness	asymptote	asymptote	NA	baseline	baseline nucleus H2AX compactness
509	1	pheno1	3	18.301237	7.653733885	17.101714	20.456899	c_nonborder_nucleus_threshold_compactness_40_percent_ser_dark_2_mean_per_well	nonborder_nucleus_threshold_compactness_40_percent_ser_dark_2_mean_per_well	c	Hoechst	nucleus	compactness	asymptote	asymptote	NA	baseline	baseline nucleus Hoechst compactness
510	1	pheno1	7	87.539922	6.946002157	81.460577	89.514184	c_nonborder_nucleus_threshold_compactness_40_percent_ser_dark_mean_per_well	nonborder_nucleus_threshold_compactness_40_percent_ser_dark_mean_per_well	c	H2AX	nucleus	compactness	asymptote	asymptote	NA	baseline	baseline nucleus H2AX compactness
511	1	pheno1	5	48.556045	7.34872504	45.42491	51.188182	c_nonborder_nucleus_threshold_compactness_40_percent_ser_edge_2_mean_per_well	nonborder_nucleus_threshold_compactness_40_percent_ser_edge_2_mean_per_well	c	Hoechst	nucleus	compactness	asymptote	asymptote	NA	baseline	baseline nucleus Hoechst compactness
512	1	pheno1	1	187.35996	5.630572977	65.331997	187.542393	c_nonborder_nucleus_threshold_compactness_40_percent_ser_edge_mean_per_well	nonborder_nucleus_threshold_compactness_40_percent_ser_edge_mean_per_well	c	H2AX	nucleus	compactness	asymptote	asymptote	NA	baseline	baseline nucleus H2AX compactness
513	1	pheno1	1	187.392713	6.51169802	184.603225	187.542393	c_nonborder_nucleus_threshold_compactness_40_percent_ser_hole_2_mean_per_well	nonborder_nucleus_threshold_compactness_40_percent_ser_hole_2_mean_per_well	c	Hoechst	nucleus	compactness	asymptote	asymptote	NA	baseline	baseline nucleus Hoechst compactness
514	1	pheno1	18	11.986717	7.912401989	4.671703	12.387209	c_nonborder_nucleus_threshold_compactness_40_percent_ser_hole_mean_per_well	nonborder_nucleus_threshold_compactness_40_percent_ser_hole_mean_per_well	c	H2AX	nucleus	compactness	asymptote	asymptote	NA	baseline	baseline nucleus H2AX compactness
515	1	pheno1	16	92.621252	6.705040546	91.116513	92.783588	c_nonborder_nucleus_threshold_compactness_40_percent_ser_ridge_2_mean_per_well	nonborder_nucleus_threshold_compactness_40_percent_ser_ridge_2_mean_per_well	c	Hoechst	nucleus	compactness	asymptote	asymptote	NA	baseline	baseline nucleus Hoechst compactness
516	1	pheno1	8	45.945228	5.443068752	40.006516	47.102152	c_nonborder_nucleus_threshold_compactness_40_percent_ser_ridge_mean_per_well	nonborder_nucleus_threshold_compactness_40_percent_ser_ridge_mean_per_well	c	H2AX	nucleus	compactness	asymptote	asymptote	NA	baseline	baseline nucleus H2AX compactness
517	1	pheno1	3	143.588353	6.326381484	17.064397	143.594558	c_nonborder_nucleus_threshold_compactness_40_percent_ser_saddle_2_mean_per_well	nonborder_nucleus_threshold_compactness_40_percent_ser_saddle_2_mean_per_well	c	Hoechst	nucleus	compactness	asymptote	asymptote	NA	baseline	baseline nucleus Hoechst compactness
518	1	pheno1	5	123.093935	5.892725931	25.143639	124.808909	c_nonborder_nucleus_threshold_compactness_40_percent_ser_saddle_mean_per_well	nonborder_nucleus_threshold_compactness_40_percent_ser_saddle_mean_per_well	c	H2AX	nucleus	compactness	asymptote	asymptote	NA	baseline	baseline nucleus H2AX compactness
519	1	pheno1	5	19.430188	7.558627854	19.048885	21.709333	c_nonborder_nucleus_threshold_compactness_40_percent_ser_spot_2_mean_per_well	nonborder_nucleus_threshold_compactness_40_percent_ser_spot_2_mean_per_well	c	Hoechst	nucleus	compactness	asymptote	asymptote	NA	baseline	baseline nucleus Hoechst compactness
520	1	pheno1	2	148.753356	7.287428303	148.38915	150.04504	c_nonborder_nucleus_threshold_compactness_40_percent_ser_spot_mean_per_well	nonborder_nucleus_threshold_compactness_40_percent_ser_spot_mean_per_well	c	H2AX	nucleus	compactness	asymptote	asymptote	NA	baseline	baseline nucleus H2AX compactness
521	1	pheno1	3	18.301237	6.358328694	17.053521	21.035978	c_nonborder_nucleus_threshold_compactness_40_percent_ser_valley_2_mean_per_well	nonborder_nucleus_threshold_compactness_40_percent_ser_valley_2_mean_per_well	c	Hoechst	nucleus	compactness	asymptote	asymptote	NA	baseline	baseline nucleus Hoechst compactness
522	1	pheno1	18	11.946322	5.901891983	5.477314	12.387209	c_nonborder_nucleus_threshold_compactness_40_percent_ser_valley_mean_per_well	nonborder_nucleus_threshold_compactness_40_percent_ser_valley_mean_per_well	c	H2AX	nucleus	compactness	asymptote	asymptote	NA	baseline	baseline nucleus H2AX compactness
523	1	pheno1	2	64.116668	7.237930608	63.94994	65.139084	c_nonborder_nucleus_threshold_compactness_50_percent_2_mean_per_well	nonborder_nucleus_threshold_compactness_50_percent_2_mean_per_well	c	Hoechst	nucleus	compactness	asymptote	asymptote	NA	baseline	baseline nucleus Hoechst compactness
524	1	pheno1	1	128.391156	6.331249411	128.233202	130.175609	c_nonborder_nucleus_threshold_compactness_50_percent_mean_per_well	nonborder_nucleus_threshold_compactness_50_percent_mean_per_well	c	H2AX	nucleus	compactness	asymptote	asymptote	NA	baseline	baseline nucleus H2AX compactness
525	1	pheno1	5	21.607284	6.698843985	18.866147	50.334827	c_nonborder_nucleus_threshold_compactness_50_percent_ser_bright_2_mean_per_well	nonborder_nucleus_threshold_compactness_50_percent_ser_bright_2_mean_per_well	c	Hoechst	nucleus	compactness	asymptote	asymptote	NA	baseline	baseline nucleus Hoechst compactness
526	1	pheno1	9	103.625742	6.585392802	27.060142	103.67893	c_nonborder_nucleus_threshold_compactness_50_percent_ser_bright_mean_per_well	nonborder_nucleus_threshold_compactness_50_percent_ser_bright_mean_per_well	c	H2AX	nucleus	compactness	asymptote	asymptote	NA	baseline	baseline nucleus H2AX compactness
527	1	pheno1	3	18.304761	8.703899259	17.101714	19.83484	c_nonborder_nucleus_threshold_compactness_50_percent_ser_dark_2_mean_per_well	nonborder_nucleus_threshold_compactness_50_percent_ser_dark_2_mean_per_well	c	Hoechst	nucleus	compactness	asymptote	asymptote	NA	baseline	baseline nucleus Hoechst compactness
528	1	pheno1	14	77.23364	6.511301092	75.681737	82.202139	c_nonborder_nucleus_threshold_compactness_50_percent_ser_dark_mean_per_well	nonborder_nucleus_threshold_compactness_50_percent_ser_dark_mean_per_well	c	H2AX	nucleus	compactness	asymptote	asymptote	NA	baseline	baseline nucleus H2AX compactness
529	1	pheno1	5	48.261376	6.666295132	44.658478	51.627008	c_nonborder_nucleus_threshold_compactness_50_percent_ser_edge_2_mean_per_well	nonborder_nucleus_threshold_compactness_50_percent_ser_edge_2_mean_per_well	c	Hoechst	nucleus	compactness	asymptote	asymptote	NA	baseline	baseline nucleus Hoechst compactness
530	1	pheno1	8	40.088933	5.183260159	37.657516	119.442184	c_nonborder_nucleus_threshold_compactness_50_percent_ser_edge_mean_per_well	nonborder_nucleus_threshold_compactness_50_percent_ser_edge_mean_per_well	c	H2AX	nucleus	compactness	asymptote	asymptote	NA	baseline	baseline nucleus H2AX compactness
531	1	pheno1	8	78.208887	6.436857283	73.010563	78.898372	c_nonborder_nucleus_threshold_compactness_50_percent_ser_hole_2_mean_per_well	nonborder_nucleus_threshold_compactness_50_percent_ser_hole_2_mean_per_well	c	Hoechst	nucleus	compactness	asymptote	asymptote	NA	baseline	baseline nucleus Hoechst compactness
532	1	pheno1	18	9.507388	7.027932754	4.290873	12.387209	c_nonborder_nucleus_threshold_compactness_50_percent_ser_hole_mean_per_well	nonborder_nucleus_threshold_compactness_50_percent_ser_hole_mean_per_well	c	H2AX	nucleus	compactness	asymptote	asymptote	NA	baseline	baseline nucleus H2AX compactness
533	1	pheno1	9	97.304723	7.289659205	96.744816	99.859776	c_nonborder_nucleus_threshold_compactness_50_percent_ser_ridge_2_mean_per_well	nonborder_nucleus_threshold_compactness_50_percent_ser_ridge_2_mean_per_well	c	Hoechst	nucleus	compactness	asymptote	asymptote	NA	baseline	baseline nucleus Hoechst compactness
534	1	pheno1	1	76.180179	6.671586029	32.869086	126.708289	c_nonborder_nucleus_threshold_compactness_50_percent_ser_ridge_mean_per_well	nonborder_nucleus_threshold_compactness_50_percent_ser_ridge_mean_per_well	c	H2AX	nucleus	compactness	asymptote	asymptote	NA	baseline	baseline nucleus H2AX compactness
535	1	pheno1	2	35.035969	6.818697118	34.941792	57.897169	c_nonborder_nucleus_threshold_compactness_50_percent_ser_saddle_2_mean_per_well	nonborder_nucleus_threshold_compactness_50_percent_ser_saddle_2_mean_per_well	c	Hoechst	nucleus	compactness	asymptote	asymptote	NA	baseline	baseline nucleus Hoechst compactness
536	1	pheno1	5	123.621358	6.146183882	25.691349	124.14668	c_nonborder_nucleus_threshold_compactness_50_percent_ser_saddle_mean_per_well	nonborder_nucleus_threshold_compactness_50_percent_ser_saddle_mean_per_well	c	H2AX	nucleus	compactness	asymptote	asymptote	NA	baseline	baseline nucleus H2AX compactness
537	1	pheno1	5	19.430188	8.563264667	19.166554	20.598105	c_nonborder_nucleus_threshold_compactness_50_percent_ser_spot_2_mean_per_well	nonborder_nucleus_threshold_compactness_50_percent_ser_spot_2_mean_per_well	c	Hoechst	nucleus	compactness	asymptote	asymptote	NA	baseline	baseline nucleus Hoechst compactness
538	1	pheno1	10	19.82669	6.613354869	19.60907	99.895829	c_nonborder_nucleus_threshold_compactness_50_percent_ser_spot_mean_per_well	nonborder_nucleus_threshold_compactness_50_percent_ser_spot_mean_per_well	c	H2AX	nucleus	compactness	asymptote	asymptote	NA	baseline	baseline nucleus H2AX compactness
539	1	pheno1	11	118.289006	6.810987281	117.524481	118.492677	c_nonborder_nucleus_threshold_compactness_50_percent_ser_valley_2_mean_per_well	nonborder_nucleus_threshold_compactness_50_percent_ser_valley_2_mean_per_well	c	Hoechst	nucleus	compactness	asymptote	asymptote	NA	baseline	baseline nucleus Hoechst compactness
540	1	pheno1	18	11.946322	6.13579213	5.488269	12.387209	c_nonborder_nucleus_threshold_compactness_50_percent_ser_valley_mean_per_well	nonborder_nucleus_threshold_compactness_50_percent_ser_valley_mean_per_well	c	H2AX	nucleus	compactness	asymptote	asymptote	NA	baseline	baseline nucleus H2AX compactness
541	1	pheno1	5	148.857775	7.157465249	148.81465	149.1049	c_nonborder_nucleus_threshold_compactness_60_percent_2_mean_per_well	nonborder_nucleus_threshold_compactness_60_percent_2_mean_per_well	c	Hoechst	nucleus	compactness	asymptote	asymptote	NA	baseline	baseline nucleus Hoechst compactness
542	1	pheno1	3	66.196891	5.434242597	20.965859	146.409872	c_nonborder_nucleus_threshold_compactness_60_percent_mean_per_well	nonborder_nucleus_threshold_compactness_60_percent_mean_per_well	c	H2AX	nucleus	compactness	asymptote	asymptote	NA	baseline	baseline nucleus H2AX compactness
543	1	pheno1	5	19.430188	8.835586821	18.95625	21.614246	c_nonborder_nucleus_threshold_compactness_60_percent_ser_bright_2_mean_per_well	nonborder_nucleus_threshold_compactness_60_percent_ser_bright_2_mean_per_well	c	Hoechst	nucleus	compactness	asymptote	asymptote	NA	baseline	baseline nucleus Hoechst compactness
544	1	pheno1	10	19.82669	6.734519024	19.629096	20.503222	c_nonborder_nucleus_threshold_compactness_60_percent_ser_bright_mean_per_well	nonborder_nucleus_threshold_compactness_60_percent_ser_bright_mean_per_well	c	H2AX	nucleus	compactness	asymptote	asymptote	maximum response	maximum response	maximum response nucleus H2AX compactness
545	1	pheno1	3	18.475212	6.127094497	9.099142	143.591027	c_nonborder_nucleus_threshold_compactness_60_percent_ser_dark_2_mean_per_well	nonborder_nucleus_threshold_compactness_60_percent_ser_dark_2_mean_per_well	c	Hoechst	nucleus	compactness	asymptote	asymptote	NA	baseline	baseline nucleus Hoechst compactness
546	1	pheno1	14	77.23364	6.594564917	75.681737	83.037521	c_nonborder_nucleus_threshold_compactness_60_percent_ser_dark_mean_per_well	nonborder_nucleus_threshold_compactness_60_percent_ser_dark_mean_per_well	c	H2AX	nucleus	compactness	asymptote	asymptote	NA	baseline	baseline nucleus H2AX compactness
547	1	pheno1	8	78.863162	6.445087077	65.018804	79.256876	c_nonborder_nucleus_threshold_compactness_60_percent_ser_edge_2_mean_per_well	nonborder_nucleus_threshold_compactness_60_percent_ser_edge_2_mean_per_well	c	Hoechst	nucleus	compactness	asymptote	asymptote	NA	baseline	baseline nucleus Hoechst compactness
548	1	pheno1	5	35.063549	5.771067958	19.414865	125.834992	c_nonborder_nucleus_threshold_compactness_60_percent_ser_edge_mean_per_well	nonborder_nucleus_threshold_compactness_60_percent_ser_edge_mean_per_well	c	H2AX	nucleus	compactness	asymptote	asymptote	NA	baseline	baseline nucleus H2AX compactness
549	1	pheno1	11	14.631761	5.932584778	12.655937	34.168718	c_nonborder_nucleus_threshold_compactness_60_percent_ser_hole_2_mean_per_well	nonborder_nucleus_threshold_compactness_60_percent_ser_hole_2_mean_per_well	c	Hoechst	nucleus	compactness	asymptote	asymptote	NA	baseline	baseline nucleus Hoechst compactness
550	1	pheno1	18	12.078769	7.265273263	4.82363	12.387209	c_nonborder_nucleus_threshold_compactness_60_percent_ser_hole_mean_per_well	nonborder_nucleus_threshold_compactness_60_percent_ser_hole_mean_per_well	c	H2AX	nucleus	compactness	asymptote	asymptote	NA	baseline	baseline nucleus H2AX compactness
551	1	pheno1	5	19.430188	7.079564955	19.024175	50.334827	c_nonborder_nucleus_threshold_compactness_60_percent_ser_ridge_2_mean_per_well	nonborder_nucleus_threshold_compactness_60_percent_ser_ridge_2_mean_per_well	c	Hoechst	nucleus	compactness	asymptote	asymptote	NA	baseline	baseline nucleus Hoechst compactness
552	1	pheno1	2	158.423315	8.792295017	137.219225	159.042198	c_nonborder_nucleus_threshold_compactness_60_percent_ser_ridge_mean_per_well	nonborder_nucleus_threshold_compactness_60_percent_ser_ridge_mean_per_well	c	H2AX	nucleus	compactness	asymptote	asymptote	NA	baseline	baseline nucleus H2AX compactness
553	1	pheno1	2	35.035969	6.149568496	30.231071	152.616044	c_nonborder_nucleus_threshold_compactness_60_percent_ser_saddle_2_mean_per_well	nonborder_nucleus_threshold_compactness_60_percent_ser_saddle_2_mean_per_well	c	Hoechst	nucleus	compactness	asymptote	asymptote	NA	baseline	baseline nucleus Hoechst compactness
554	1	pheno1	18	46.338196	6.208942857	46.1844	51.537355	c_nonborder_nucleus_threshold_compactness_60_percent_ser_saddle_mean_per_well	nonborder_nucleus_threshold_compactness_60_percent_ser_saddle_mean_per_well	c	H2AX	nucleus	compactness	asymptote	asymptote	NA	baseline	baseline nucleus H2AX compactness
555	1	pheno1	5	19.546347	7.044368767	19.132157	21.607284	c_nonborder_nucleus_threshold_compactness_60_percent_ser_spot_2_mean_per_well	nonborder_nucleus_threshold_compactness_60_percent_ser_spot_2_mean_per_well	c	Hoechst	nucleus	compactness	asymptote	asymptote	NA	baseline	baseline nucleus Hoechst compactness
556	1	pheno1	10	96.256211	6.811156787	95.171292	99.222019	c_nonborder_nucleus_threshold_compactness_60_percent_ser_spot_mean_per_well	nonborder_nucleus_threshold_compactness_60_percent_ser_spot_mean_per_well	c	H2AX	nucleus	compactness	asymptote	asymptote	NA	baseline	baseline nucleus H2AX compactness
557	1	pheno1	6	19.83271	6.732614869	17.553096	21.009358	c_nonborder_nucleus_threshold_compactness_60_percent_ser_valley_2_mean_per_well	nonborder_nucleus_threshold_compactness_60_percent_ser_valley_2_mean_per_well	c	Hoechst	nucleus	compactness	asymptote	asymptote	NA	baseline	baseline nucleus Hoechst compactness
558	1	pheno1	18	10.563484	6.032474591	5.455641	46.861153	c_nonborder_nucleus_threshold_compactness_60_percent_ser_valley_mean_per_well	nonborder_nucleus_threshold_compactness_60_percent_ser_valley_mean_per_well	c	H2AX	nucleus	compactness	asymptote	asymptote	NA	baseline	baseline nucleus H2AX compactness
559	1	pheno1	14	19.401644	7.313338519	10.760938	19.594813	c_nonborder_nucleus_width_mm_mean_per_well	nonborder_nucleus_width_mm_mean_per_well	c	Hoechst	nucleus	size	asymptote	asymptote	maximum response	maximum response	maximum response nucleus Hoechst size
560	1	pheno1	2	27.232305	6.439314268	5.653007	38.505681	c_nonborder_number_of_objects	nonborder_number_of_objects	c	H2AX	nucleus	count	asymptote	asymptote	maximum response	maximum response	maximum response nucleus H2AX count
561	1	pheno1	5	135.599561	6.761496832	134.759661	138.090341	c_nonborder_relative_spot_intensity_mean_per_well	nonborder_relative_spot_intensity_mean_per_well	c	H2AX	nucleus	intensity	asymptote	asymptote	maximum response	maximum response	maximum response nucleus H2AX intensity
562	1	pheno1	11	96.986958	6.431102823	96.50426	118.311978	c_nuclei_number_of_objects	nuclei_number_of_objects	c	H2AX	nucleus	count	asymptote	asymptote	maximum response	maximum response	maximum response nucleus H2AX count
563	1	pheno1	5	73.362735	6.093277043	72.590359	73.885829	c_spots_sliding_parabola_selected_corrected_spot_intensity_min_per_well	spots_sliding_parabola_selected_corrected_spot_intensity_min_per_well	c	H2AX	nucleus	DNA damage	asymptote	asymptote	NA	baseline	baseline nucleus H2AX DNA damage
564	1	pheno1	12	45.489422	6.195431975	32.920862	46.680095	c_spots_sliding_parabola_selected_number_of_spots_per_area_of_nucleus_mean_per_nucleus_median_per_well	spots_sliding_parabola_selected_number_of_spots_per_area_of_nucleus_mean_per_nucleus_median_per_well	c	H2AX	nucleus	DNA damage	asymptote	asymptote	NA	baseline	baseline nucleus H2AX DNA damage
565	1	pheno1	14	56.860914	6.507001962	56.676018	57.221447	c_spots_sliding_parabola_selected_uncorrected_spot_peak_intensity_max_per_well	spots_sliding_parabola_selected_uncorrected_spot_peak_intensity_max_per_well	c	H2AX	nucleus	DNA damage	asymptote	asymptote	maximum response	maximum response	maximum response nucleus H2AX DNA damage
566	1	pheno1	12	5.180911	8.571349537	4.026321	5.281294	d_nonborder_cell_3_area_mm2_mean_per_well	nonborder_cell_3_area_mm2_mean_per_well	d	MitoTracker	cell	size	asymptote	asymptote	NA	baseline	baseline cell MitoTracker size
567	1	pheno1	11	88.467021	6.227728512	12.769954	89.204256	d_nonborder_cell_3_roundness_mean_per_well	nonborder_cell_3_roundness_mean_per_well	d	MitoTracker	cell	shape	asymptote	asymptote	maximum response	maximum response	maximum response cell MitoTracker shape
568	1	pheno1	12	77.002675	8.29941892	75.73564	77.022568	d_nonborder_cell_mito_tracker_deep_red_ser_bright_1_5_px_mean_per_well	nonborder_cell_mito_tracker_deep_red_ser_bright_1_5_px_mean_per_well	d	MitoTracker	mitochondria	texture	asymptote	asymptote	NA	baseline	baseline mitochondria MitoTracker texture
569	1	pheno1	14	47.332527	6.651901067	46.778644	118.554159	d_nonborder_cell_mito_tracker_deep_red_ser_dark_1_5_px_mean_per_well	nonborder_cell_mito_tracker_deep_red_ser_dark_1_5_px_mean_per_well	d	MitoTracker	mitochondria	texture	asymptote	asymptote	maximum response	maximum response	maximum response mitochondria MitoTracker texture
570	1	pheno1	3	100.864384	7.056168748	98.208258	104.743823	d_nonborder_cell_mito_tracker_deep_red_ser_edge_1_5_px_mean_per_well	nonborder_cell_mito_tracker_deep_red_ser_edge_1_5_px_mean_per_well	d	MitoTracker	mitochondria	texture	asymptote	asymptote	maximum response	maximum response	maximum response mitochondria MitoTracker texture
571	1	pheno1	2	121.399584	7.264762584	119.587147	123.393661	d_nonborder_cell_mito_tracker_deep_red_ser_hole_1_5_px_mean_per_well	nonborder_cell_mito_tracker_deep_red_ser_hole_1_5_px_mean_per_well	d	MitoTracker	mitochondria	texture	asymptote	asymptote	NA	baseline	baseline mitochondria MitoTracker texture
572	1	pheno1	12	77.005453	8.145009632	75.645401	77.023767	d_nonborder_cell_mito_tracker_deep_red_ser_ridge_1_5_px_mean_per_well	nonborder_cell_mito_tracker_deep_red_ser_ridge_1_5_px_mean_per_well	d	MitoTracker	mitochondria	texture	asymptote	asymptote	NA	baseline	baseline mitochondria MitoTracker texture
573	1	pheno1	15	38.325952	6.089219031	38.013926	85.740797	d_nonborder_cell_mito_tracker_deep_red_ser_saddle_1_5_px_mean_per_well	nonborder_cell_mito_tracker_deep_red_ser_saddle_1_5_px_mean_per_well	d	MitoTracker	mitochondria	texture	asymptote	asymptote	maximum response	maximum response	maximum response mitochondria MitoTracker texture
574	1	pheno1	8	68.484091	6.788077277	68.162989	78.863162	d_nonborder_cell_mito_tracker_deep_red_ser_spot_1_5_px_mean_per_well	nonborder_cell_mito_tracker_deep_red_ser_spot_1_5_px_mean_per_well	d	MitoTracker	mitochondria	texture	asymptote	asymptote	NA	baseline	baseline mitochondria MitoTracker texture
575	1	pheno1	14	118.320059	6.29644335	93.454916	118.597963	d_nonborder_cell_mito_tracker_deep_red_ser_valley_1_5_px_mean_per_well	nonborder_cell_mito_tracker_deep_red_ser_valley_1_5_px_mean_per_well	d	MitoTracker	mitochondria	texture	asymptote	asymptote	maximum response	maximum response	maximum response mitochondria MitoTracker texture
576	1	pheno1	13	61.662534	5.808043122	60.414277	101.995271	d_nonborder_cell_nearest_neighbor_distance_mm_mean_per_well	nonborder_cell_nearest_neighbor_distance_mm_mean_per_well	d	MitoTracker	cell	size	asymptote	asymptote	maximum response	maximum response	maximum response cell MitoTracker size
577	1	pheno1	18	11.078447	6.826394626	5.856653	27.665519	d_nonborder_intensity_cytoplasm_3_mito_tracker_deep_red_contrast_mean_per_well	nonborder_intensity_cytoplasm_3_mito_tracker_deep_red_contrast_mean_per_well	d	MitoTracker	mitochondria	intensity	asymptote	asymptote	NA	baseline	baseline mitochondria MitoTracker intensity
578	1	pheno1	11	37.082834	7.306910804	35.361615	37.931132	d_nonborder_intensity_cytoplasm_3_mito_tracker_deep_red_mean_mean_per_well	nonborder_intensity_cytoplasm_3_mito_tracker_deep_red_mean_mean_per_well	d	MitoTracker	mitochondria	intensity	asymptote	asymptote	maximum response	maximum response	maximum response mitochondria MitoTracker intensity
579	1	pheno1	11	37.673498	6.439350988	35.396703	103.677865	d_nonborder_intensity_cytoplasm_3_mito_tracker_deep_red_median_mean_per_well	nonborder_intensity_cytoplasm_3_mito_tracker_deep_red_median_mean_per_well	d	MitoTracker	mitochondria	intensity	asymptote	asymptote	maximum response	maximum response	maximum response mitochondria MitoTracker intensity
580	1	pheno1	15	16.834537	5.775263944	15.573596	18.94102	d_nonborder_intensity_hoechst_area_contrast_mean_per_well	nonborder_intensity_hoechst_area_contrast_mean_per_well	d	Hoechst	nucleus	intensity	asymptote	asymptote	maximum response	maximum response	maximum response nucleus Hoechst intensity
581	1	pheno1	14	18.719544	7.01596939	10.861146	19.594813	d_nonborder_intensity_hoechst_area_mean_mean_per_well	nonborder_intensity_hoechst_area_mean_mean_per_well	d	Hoechst	nucleus	intensity	asymptote	asymptote	maximum response	maximum response	maximum response nucleus Hoechst intensity
582	1	pheno1	5	70.421907	6.603407813	31.618095	73.954225	d_nonborder_intensity_hoechst_area_median_mean_per_well	nonborder_intensity_hoechst_area_median_mean_per_well	d	Hoechst	nucleus	intensity	asymptote	asymptote	maximum response	maximum response	maximum response nucleus Hoechst intensity
583	1	pheno1	5	36.421525	5.410444161	27.831218	81.125372	d_nonborder_intensity_hoechst_ring_contrast_mean_per_well	nonborder_intensity_hoechst_ring_contrast_mean_per_well	d	Hoechst	nucleus	intensity	asymptote	asymptote	maximum response	maximum response	maximum response nucleus Hoechst intensity
584	1	pheno1	14	18.719544	6.761212026	10.818506	19.594813	d_nonborder_intensity_hoechst_ring_mean_mean_per_well	nonborder_intensity_hoechst_ring_mean_mean_per_well	d	Hoechst	nucleus	intensity	asymptote	asymptote	maximum response	maximum response	maximum response nucleus Hoechst intensity
585	1	pheno1	16	23.663019	6.607515233	23.267383	23.900139	d_nonborder_intensity_hoechst_ring_median_mean_per_well	nonborder_intensity_hoechst_ring_median_mean_per_well	d	Hoechst	nucleus	intensity	asymptote	asymptote	maximum response	maximum response	maximum response nucleus Hoechst intensity
586	1	pheno1	18	27.959891	7.56339486	24.832942	29.336199	d_nonborder_intensity_mitoringregion_mito_tracker_deep_red_contrast_mean_per_well	nonborder_intensity_mitoringregion_mito_tracker_deep_red_contrast_mean_per_well	d	MitoTracker	mitochondria	intensity	asymptote	asymptote	NA	baseline	baseline mitochondria MitoTracker intensity
587	1	pheno1	13	53.57538	7.741982429	43.731742	53.95282	d_nonborder_intensity_mitoringregion_mito_tracker_deep_red_mean_mean_per_well	nonborder_intensity_mitoringregion_mito_tracker_deep_red_mean_mean_per_well	d	MitoTracker	mitochondria	intensity	asymptote	asymptote	NA	baseline	baseline mitochondria MitoTracker intensity
588	1	pheno1	11	37.561846	7.46719083	36.982494	37.931132	d_nonborder_intensity_mitoringregion_mito_tracker_deep_red_median_mean_per_well	nonborder_intensity_mitoringregion_mito_tracker_deep_red_median_mean_per_well	d	MitoTracker	mitochondria	intensity	asymptote	asymptote	NA	baseline	baseline mitochondria MitoTracker intensity
589	1	pheno1	1	10.741675	7.430727019	6.097778	12.785941	d_nonborder_intensity_mitoringregion_mitosmooth_contrast_mean_per_well	nonborder_intensity_mitoringregion_mitosmooth_contrast_mean_per_well	d	MitoTracker	mitochondria	intensity	asymptote	asymptote	maximum response	maximum response	maximum response mitochondria MitoTracker intensity
590	1	pheno1	6	77.244458	6.916302038	74.186099	78.137484	d_nonborder_intensity_mitoringregion_mitosmooth_mean_mean_per_well	nonborder_intensity_mitoringregion_mitosmooth_mean_mean_per_well	d	MitoTracker	mitochondria	intensity	asymptote	asymptote	maximum response	maximum response	maximum response mitochondria MitoTracker intensity
591	1	pheno1	13	44.233519	6.41217802	43.330958	53.816323	d_nonborder_intensity_mitoringregion_mitosmooth_median_mean_per_well	nonborder_intensity_mitoringregion_mitosmooth_median_mean_per_well	d	MitoTracker	mitochondria	intensity	asymptote	asymptote	maximum response	maximum response	maximum response mitochondria MitoTracker intensity
592	1	pheno1	18	33.674239	6.233403167	29.677543	33.859613	d_nonborder_intensity_nucleus_hoechst_33342_contrast_mean_per_well	nonborder_intensity_nucleus_hoechst_33342_contrast_mean_per_well	d	Hoechst	nucleus	intensity	asymptote	asymptote	maximum response	maximum response	maximum response nucleus Hoechst intensity
593	1	pheno1	5	70.421907	6.887572472	45.415239	71.715959	d_nonborder_intensity_nucleus_hoechst_33342_mean_mean_per_well	nonborder_intensity_nucleus_hoechst_33342_mean_mean_per_well	d	Hoechst	nucleus	intensity	asymptote	asymptote	maximum response	maximum response	maximum response nucleus Hoechst intensity
594	1	pheno1	12	29.973047	6.763834799	27.923647	34.168223	d_nonborder_intensity_nucleus_hoechst_33342_median_mean_per_well	nonborder_intensity_nucleus_hoechst_33342_median_mean_per_well	d	Hoechst	nucleus	intensity	asymptote	asymptote	maximum response	maximum response	maximum response nucleus Hoechst intensity
595	1	pheno1	18	9.507388	8.373184262	5.791015	12.387209	d_nonborder_mitosmooth_area_mm2_mean_per_well	nonborder_mitosmooth_area_mm2_mean_per_well	d	MitoTracker	cell	size	asymptote	asymptote	NA	baseline	baseline cell MitoTracker size
596	1	pheno1	16	23.554615	5.434613486	21.380963	24.051331	d_nonborder_mitosmooth_axial_length_ratio_mean_per_well	nonborder_mitosmooth_axial_length_ratio_mean_per_well	d	MitoTracker	cell	distribution	asymptote	asymptote	maximum response	maximum response	maximum response cell MitoTracker distribution
597	1	pheno1	1	35.721123	6.558518803	35.066466	37.525527	d_nonborder_mitosmooth_axial_length_ratio_ser_bright_mean_per_well	nonborder_mitosmooth_axial_length_ratio_ser_bright_mean_per_well	d	MitoTracker	cell	distribution	asymptote	asymptote	maximum response	maximum response	maximum response cell MitoTracker distribution
598	1	pheno1	12	29.125788	5.728486897	28.558966	34.269262	d_nonborder_mitosmooth_axial_length_ratio_ser_dark_mean_per_well	nonborder_mitosmooth_axial_length_ratio_ser_dark_mean_per_well	d	MitoTracker	cell	distribution	asymptote	asymptote	maximum response	maximum response	maximum response cell MitoTracker distribution
599	1	pheno1	12	31.463942	5.688070661	28.558966	34.43004	d_nonborder_mitosmooth_axial_length_ratio_ser_edge_mean_per_well	nonborder_mitosmooth_axial_length_ratio_ser_edge_mean_per_well	d	MitoTracker	cell	distribution	asymptote	asymptote	maximum response	maximum response	maximum response cell MitoTracker distribution
600	1	pheno1	12	31.463942	6.316934971	28.578081	34.247274	d_nonborder_mitosmooth_axial_length_ratio_ser_hole_mean_per_well	nonborder_mitosmooth_axial_length_ratio_ser_hole_mean_per_well	d	MitoTracker	cell	distribution	asymptote	asymptote	maximum response	maximum response	maximum response cell MitoTracker distribution
601	1	pheno1	5	50.241412	6.103057769	11.24316	50.334827	d_nonborder_mitosmooth_axial_length_ratio_ser_ridge_mean_per_well	nonborder_mitosmooth_axial_length_ratio_ser_ridge_mean_per_well	d	MitoTracker	cell	distribution	asymptote	asymptote	maximum response	maximum response	maximum response cell MitoTracker distribution
602	1	pheno1	1	35.721123	5.884421351	34.475749	38.222097	d_nonborder_mitosmooth_axial_length_ratio_ser_saddle_mean_per_well	nonborder_mitosmooth_axial_length_ratio_ser_saddle_mean_per_well	d	MitoTracker	cell	distribution	asymptote	asymptote	maximum response	maximum response	maximum response cell MitoTracker distribution
603	1	pheno1	1	35.721123	5.894948088	34.487132	37.618132	d_nonborder_mitosmooth_axial_length_ratio_ser_spot_mean_per_well	nonborder_mitosmooth_axial_length_ratio_ser_spot_mean_per_well	d	MitoTracker	cell	distribution	asymptote	asymptote	maximum response	maximum response	maximum response cell MitoTracker distribution
604	1	pheno1	12	28.724571	6.496928668	28.562325	34.247274	d_nonborder_mitosmooth_axial_length_ratio_ser_valley_mean_per_well	nonborder_mitosmooth_axial_length_ratio_ser_valley_mean_per_well	d	MitoTracker	cell	distribution	asymptote	asymptote	maximum response	maximum response	maximum response cell MitoTracker distribution
605	1	pheno1	18	9.507388	7.316640359	5.587256	45.256019	d_nonborder_mitosmooth_axial_small_length_mean_per_well	nonborder_mitosmooth_axial_small_length_mean_per_well	d	MitoTracker	cell	size	asymptote	asymptote	NA	baseline	baseline cell MitoTracker size
606	1	pheno1	18	12.137382	7.051872996	5.801654	33.836936	d_nonborder_mitosmooth_axial_small_length_ser_bright_mean_per_well	nonborder_mitosmooth_axial_small_length_ser_bright_mean_per_well	d	MitoTracker	cell	distribution	asymptote	asymptote	NA	baseline	baseline cell MitoTracker distribution
607	1	pheno1	18	12.137382	8.734363905	5.967848	12.402095	d_nonborder_mitosmooth_axial_small_length_ser_dark_mean_per_well	nonborder_mitosmooth_axial_small_length_ser_dark_mean_per_well	d	MitoTracker	cell	distribution	asymptote	asymptote	NA	baseline	baseline cell MitoTracker distribution
608	1	pheno1	18	12.137382	7.661576588	5.791015	33.836936	d_nonborder_mitosmooth_axial_small_length_ser_edge_mean_per_well	nonborder_mitosmooth_axial_small_length_ser_edge_mean_per_well	d	MitoTracker	cell	distribution	asymptote	asymptote	NA	baseline	baseline cell MitoTracker distribution
609	1	pheno1	18	12.137382	7.237567119	5.791015	33.836936	d_nonborder_mitosmooth_axial_small_length_ser_hole_mean_per_well	nonborder_mitosmooth_axial_small_length_ser_hole_mean_per_well	d	MitoTracker	cell	distribution	asymptote	asymptote	NA	baseline	baseline cell MitoTracker distribution
610	1	pheno1	19	16.860212	6.907866942	16.68876	16.969565	d_nonborder_mitosmooth_axial_small_length_ser_ridge_mean_per_well	nonborder_mitosmooth_axial_small_length_ser_ridge_mean_per_well	d	MitoTracker	cell	distribution	asymptote	asymptote	NA	baseline	baseline cell MitoTracker distribution
611	1	pheno1	18	12.137382	7.412719702	5.70076	33.836936	d_nonborder_mitosmooth_axial_small_length_ser_saddle_mean_per_well	nonborder_mitosmooth_axial_small_length_ser_saddle_mean_per_well	d	MitoTracker	cell	distribution	asymptote	asymptote	NA	baseline	baseline cell MitoTracker distribution
612	1	pheno1	18	12.137382	7.110729189	5.791015	33.96669	d_nonborder_mitosmooth_axial_small_length_ser_spot_mean_per_well	nonborder_mitosmooth_axial_small_length_ser_spot_mean_per_well	d	MitoTracker	cell	distribution	asymptote	asymptote	NA	baseline	baseline cell MitoTracker distribution
613	1	pheno1	18	12.137382	8.96084261	6.392184	12.402095	d_nonborder_mitosmooth_axial_small_length_ser_valley_mean_per_well	nonborder_mitosmooth_axial_small_length_ser_valley_mean_per_well	d	MitoTracker	cell	distribution	asymptote	asymptote	NA	baseline	baseline cell MitoTracker distribution
614	1	pheno1	18	10.439508	8.189105915	5.806101	12.387209	d_nonborder_mitosmooth_length_mm_mean_per_well	nonborder_mitosmooth_length_mm_mean_per_well	d	MitoTracker	cell	size	asymptote	asymptote	NA	baseline	baseline cell MitoTracker size
615	1	pheno1	1	137.763646	7.667243448	135.414388	138.692613	d_nonborder_mitosmooth_profile_1_2_mean_per_well	nonborder_mitosmooth_profile_1_2_mean_per_well	d	MitoTracker	cell	distribution	asymptote	asymptote	NA	baseline	baseline cell MitoTracker distribution
616	1	pheno1	12	77.014467	8.595479917	75.814154	77.023767	d_nonborder_mitosmooth_profile_1_2_ser_bright_mean_per_well	nonborder_mitosmooth_profile_1_2_ser_bright_mean_per_well	d	MitoTracker	cell	distribution	asymptote	asymptote	NA	baseline	baseline cell MitoTracker distribution
617	1	pheno1	5	29.915971	6.351017675	28.554089	30.633038	d_nonborder_mitosmooth_profile_1_2_ser_dark_mean_per_well	nonborder_mitosmooth_profile_1_2_ser_dark_mean_per_well	d	MitoTracker	cell	distribution	asymptote	asymptote	maximum response	maximum response	maximum response cell MitoTracker distribution
618	1	pheno1	17	30.418712	5.772074727	29.25071	64.82892	d_nonborder_mitosmooth_profile_1_2_ser_edge_mean_per_well	nonborder_mitosmooth_profile_1_2_ser_edge_mean_per_well	d	MitoTracker	cell	distribution	asymptote	asymptote	maximum response	maximum response	maximum response cell MitoTracker distribution
619	1	pheno1	17	31.340667	5.426859299	30.390221	31.766307	d_nonborder_mitosmooth_profile_1_2_ser_hole_mean_per_well	nonborder_mitosmooth_profile_1_2_ser_hole_mean_per_well	d	MitoTracker	cell	distribution	asymptote	asymptote	maximum response	maximum response	maximum response cell MitoTracker distribution
620	1	pheno1	12	77.014467	7.50055989	76.165394	77.070663	d_nonborder_mitosmooth_profile_1_2_ser_ridge_mean_per_well	nonborder_mitosmooth_profile_1_2_ser_ridge_mean_per_well	d	MitoTracker	cell	distribution	asymptote	asymptote	NA	baseline	baseline cell MitoTracker distribution
621	1	pheno1	3	97.589879	5.990621729	88.447358	111.049689	d_nonborder_mitosmooth_profile_1_2_ser_saddle_mean_per_well	nonborder_mitosmooth_profile_1_2_ser_saddle_mean_per_well	d	MitoTracker	cell	distribution	asymptote	asymptote	maximum response	maximum response	maximum response cell MitoTracker distribution
622	1	pheno1	12	77.005453	6.531205089	75.632276	88.989875	d_nonborder_mitosmooth_profile_1_2_ser_spot_mean_per_well	nonborder_mitosmooth_profile_1_2_ser_spot_mean_per_well	d	MitoTracker	cell	distribution	asymptote	asymptote	NA	baseline	baseline cell MitoTracker distribution
623	1	pheno1	17	29.309465	6.841712545	28.68883	30.889788	d_nonborder_mitosmooth_profile_1_2_ser_valley_mean_per_well	nonborder_mitosmooth_profile_1_2_ser_valley_mean_per_well	d	MitoTracker	cell	distribution	asymptote	asymptote	maximum response	maximum response	maximum response cell MitoTracker distribution
624	1	pheno1	11	85.672215	6.718648674	83.540612	91.74591	d_nonborder_mitosmooth_profile_2_2_mean_per_well	nonborder_mitosmooth_profile_2_2_mean_per_well	d	MitoTracker	cell	distribution	asymptote	asymptote	maximum response	maximum response	maximum response cell MitoTracker distribution
625	1	pheno1	5	28.710506	7.05280153	28.287957	28.962415	d_nonborder_mitosmooth_profile_2_2_ser_bright_mean_per_well	nonborder_mitosmooth_profile_2_2_ser_bright_mean_per_well	d	MitoTracker	cell	distribution	asymptote	asymptote	maximum response	maximum response	maximum response cell MitoTracker distribution
626	1	pheno1	2	141.113682	5.756782275	8.080385	146.688709	d_nonborder_mitosmooth_profile_2_2_ser_dark_mean_per_well	nonborder_mitosmooth_profile_2_2_ser_dark_mean_per_well	d	MitoTracker	cell	distribution	asymptote	asymptote	maximum response	maximum response	maximum response cell MitoTracker distribution
627	1	pheno1	16	23.476301	7.33726471	20.523808	23.875934	d_nonborder_mitosmooth_profile_2_2_ser_edge_mean_per_well	nonborder_mitosmooth_profile_2_2_ser_edge_mean_per_well	d	MitoTracker	cell	distribution	asymptote	asymptote	maximum response	maximum response	maximum response cell MitoTracker distribution
628	1	pheno1	14	102.836033	6.47786059	23.748091	103.614448	d_nonborder_mitosmooth_profile_2_2_ser_hole_mean_per_well	nonborder_mitosmooth_profile_2_2_ser_hole_mean_per_well	d	MitoTracker	cell	distribution	asymptote	asymptote	NA	baseline	baseline cell MitoTracker distribution
629	1	pheno1	18	33.672461	6.951252258	32.958146	34.167319	d_nonborder_mitosmooth_profile_2_2_ser_ridge_mean_per_well	nonborder_mitosmooth_profile_2_2_ser_ridge_mean_per_well	d	MitoTracker	cell	distribution	asymptote	asymptote	maximum response	maximum response	maximum response cell MitoTracker distribution
630	1	pheno1	5	97.104599	6.005831953	96.410103	113.016243	d_nonborder_mitosmooth_profile_2_2_ser_saddle_mean_per_well	nonborder_mitosmooth_profile_2_2_ser_saddle_mean_per_well	d	MitoTracker	cell	distribution	asymptote	asymptote	maximum response	maximum response	maximum response cell MitoTracker distribution
631	1	pheno1	4	40.784151	8.536628529	39.868386	41.036654	d_nonborder_mitosmooth_profile_2_2_ser_spot_mean_per_well	nonborder_mitosmooth_profile_2_2_ser_spot_mean_per_well	d	MitoTracker	cell	distribution	asymptote	asymptote	maximum response	maximum response	maximum response cell MitoTracker distribution
632	1	pheno1	16	23.699614	6.33656862	17.268883	24.003559	d_nonborder_mitosmooth_profile_2_2_ser_valley_mean_per_well	nonborder_mitosmooth_profile_2_2_ser_valley_mean_per_well	d	MitoTracker	cell	distribution	asymptote	asymptote	maximum response	maximum response	maximum response cell MitoTracker distribution
633	1	pheno1	18	9.507388	8.060300299	5.791015	33.836936	d_nonborder_mitosmooth_radial_mean_mean_per_well	nonborder_mitosmooth_radial_mean_mean_per_well	d	MitoTracker	cell	distribution	asymptote	asymptote	NA	baseline	baseline cell MitoTracker distribution
634	1	pheno1	12	77.014467	5.628185655	75.289939	78.08912	d_nonborder_mitosmooth_radial_mean_ratio_ser_bright_mean_per_well	nonborder_mitosmooth_radial_mean_ratio_ser_bright_mean_per_well	d	MitoTracker	cell	distribution	asymptote	asymptote	maximum response	maximum response	maximum response cell MitoTracker distribution
635	1	pheno1	19	25.644542	6.211922543	25.15198	25.750358	d_nonborder_mitosmooth_radial_mean_ratio_ser_dark_mean_per_well	nonborder_mitosmooth_radial_mean_ratio_ser_dark_mean_per_well	d	MitoTracker	cell	distribution	asymptote	asymptote	maximum response	maximum response	maximum response cell MitoTracker distribution
636	1	pheno1	16	50.127073	6.772606018	49.869701	50.808985	d_nonborder_mitosmooth_radial_mean_ratio_ser_edge_mean_per_well	nonborder_mitosmooth_radial_mean_ratio_ser_edge_mean_per_well	d	MitoTracker	cell	distribution	asymptote	asymptote	maximum response	maximum response	maximum response cell MitoTracker distribution
637	1	pheno1	5	73.957068	7.836953769	72.246631	74.097256	d_nonborder_mitosmooth_radial_mean_ratio_ser_hole_mean_per_well	nonborder_mitosmooth_radial_mean_ratio_ser_hole_mean_per_well	d	MitoTracker	cell	distribution	asymptote	asymptote	maximum response	maximum response	maximum response cell MitoTracker distribution
638	1	pheno1	X	53.225575	7.399888156	53.131145	53.635876	d_nonborder_mitosmooth_radial_mean_ratio_ser_ridge_mean_per_well	nonborder_mitosmooth_radial_mean_ratio_ser_ridge_mean_per_well	d	MitoTracker	cell	distribution	asymptote	asymptote	maximum response	maximum response	maximum response cell MitoTracker distribution
639	1	pheno1	16	50.127073	7.556454418	48.674501	50.842794	d_nonborder_mitosmooth_radial_mean_ratio_ser_saddle_mean_per_well	nonborder_mitosmooth_radial_mean_ratio_ser_saddle_mean_per_well	d	MitoTracker	cell	distribution	asymptote	asymptote	maximum response	maximum response	maximum response cell MitoTracker distribution
640	1	pheno1	7	45.701035	5.103236929	3.356917	129.583811	d_nonborder_mitosmooth_radial_mean_ratio_ser_spot_mean_per_well	nonborder_mitosmooth_radial_mean_ratio_ser_spot_mean_per_well	d	MitoTracker	cell	distribution	asymptote	asymptote	maximum response	maximum response	maximum response cell MitoTracker distribution
641	1	pheno1	16	50.12064	7.085275298	49.846156	50.333794	d_nonborder_mitosmooth_radial_mean_ratio_ser_valley_mean_per_well	nonborder_mitosmooth_radial_mean_ratio_ser_valley_mean_per_well	d	MitoTracker	cell	distribution	asymptote	asymptote	maximum response	maximum response	maximum response cell MitoTracker distribution
642	1	pheno1	18	10.439508	7.86789162	5.791015	12.387209	d_nonborder_mitosmooth_radial_mean_ser_bright_mean_per_well	nonborder_mitosmooth_radial_mean_ser_bright_mean_per_well	d	MitoTracker	cell	distribution	asymptote	asymptote	NA	baseline	baseline cell MitoTracker distribution
643	1	pheno1	18	11.986717	8.242921633	5.856653	12.387209	d_nonborder_mitosmooth_radial_mean_ser_dark_mean_per_well	nonborder_mitosmooth_radial_mean_ser_dark_mean_per_well	d	MitoTracker	cell	distribution	asymptote	asymptote	NA	baseline	baseline cell MitoTracker distribution
644	1	pheno1	18	12.137382	7.766415456	5.791015	33.836936	d_nonborder_mitosmooth_radial_mean_ser_edge_mean_per_well	nonborder_mitosmooth_radial_mean_ser_edge_mean_per_well	d	MitoTracker	cell	distribution	asymptote	asymptote	NA	baseline	baseline cell MitoTracker distribution
645	1	pheno1	18	11.205569	7.944302674	5.804229	12.402095	d_nonborder_mitosmooth_radial_mean_ser_hole_mean_per_well	nonborder_mitosmooth_radial_mean_ser_hole_mean_per_well	d	MitoTracker	cell	distribution	asymptote	asymptote	NA	baseline	baseline cell MitoTracker distribution
646	1	pheno1	18	12.137382	7.901693369	5.801654	12.387209	d_nonborder_mitosmooth_radial_mean_ser_ridge_mean_per_well	nonborder_mitosmooth_radial_mean_ser_ridge_mean_per_well	d	MitoTracker	cell	distribution	asymptote	asymptote	NA	baseline	baseline cell MitoTracker distribution
647	1	pheno1	18	12.137382	8.526855636	5.856653	12.387209	d_nonborder_mitosmooth_radial_mean_ser_saddle_mean_per_well	nonborder_mitosmooth_radial_mean_ser_saddle_mean_per_well	d	MitoTracker	cell	distribution	asymptote	asymptote	NA	baseline	baseline cell MitoTracker distribution
648	1	pheno1	18	10.439508	8.037043768	5.801654	12.387209	d_nonborder_mitosmooth_radial_mean_ser_spot_mean_per_well	nonborder_mitosmooth_radial_mean_ser_spot_mean_per_well	d	MitoTracker	cell	distribution	asymptote	asymptote	NA	baseline	baseline cell MitoTracker distribution
649	1	pheno1	18	12.137382	8.544279514	5.856653	12.387209	d_nonborder_mitosmooth_radial_mean_ser_valley_mean_per_well	nonborder_mitosmooth_radial_mean_ser_valley_mean_per_well	d	MitoTracker	cell	distribution	asymptote	asymptote	NA	baseline	baseline cell MitoTracker distribution
650	1	pheno1	13	83.89759	6.904286935	83.778845	84.156582	d_nonborder_mitosmooth_radial_relative_deviation_mean_per_well	nonborder_mitosmooth_radial_relative_deviation_mean_per_well	d	MitoTracker	cell	distribution	asymptote	asymptote	NA	baseline	baseline cell MitoTracker distribution
651	1	pheno1	4	102.709272	6.743931886	100.907866	103.938784	d_nonborder_mitosmooth_radial_relative_deviation_ser_bright_mean_per_well	nonborder_mitosmooth_radial_relative_deviation_ser_bright_mean_per_well	d	MitoTracker	cell	distribution	asymptote	asymptote	NA	baseline	baseline cell MitoTracker distribution
652	1	pheno1	12	87.131543	6.325745337	86.341384	88.569838	d_nonborder_mitosmooth_radial_relative_deviation_ser_dark_mean_per_well	nonborder_mitosmooth_radial_relative_deviation_ser_dark_mean_per_well	d	MitoTracker	cell	distribution	asymptote	asymptote	NA	baseline	baseline cell MitoTracker distribution
653	1	pheno1	15	25.489057	5.827658038	22.552915	27.617294	d_nonborder_mitosmooth_radial_relative_deviation_ser_edge_mean_per_well	nonborder_mitosmooth_radial_relative_deviation_ser_edge_mean_per_well	d	MitoTracker	cell	distribution	asymptote	asymptote	NA	baseline	baseline cell MitoTracker distribution
654	1	pheno1	2	148.448141	5.79146165	132.881633	150.768364	d_nonborder_mitosmooth_radial_relative_deviation_ser_hole_mean_per_well	nonborder_mitosmooth_radial_relative_deviation_ser_hole_mean_per_well	d	MitoTracker	cell	distribution	asymptote	asymptote	NA	baseline	baseline cell MitoTracker distribution
655	1	pheno1	7	124.654634	6.643502654	124.585093	131.949867	d_nonborder_mitosmooth_radial_relative_deviation_ser_ridge_mean_per_well	nonborder_mitosmooth_radial_relative_deviation_ser_ridge_mean_per_well	d	MitoTracker	cell	distribution	asymptote	asymptote	NA	baseline	baseline cell MitoTracker distribution
656	1	pheno1	12	86.693005	6.312252309	84.118063	91.511665	d_nonborder_mitosmooth_radial_relative_deviation_ser_saddle_mean_per_well	nonborder_mitosmooth_radial_relative_deviation_ser_saddle_mean_per_well	d	MitoTracker	cell	distribution	asymptote	asymptote	NA	baseline	baseline cell MitoTracker distribution
657	1	pheno1	3	143.595252	8.265952437	141.942971	143.599843	d_nonborder_mitosmooth_radial_relative_deviation_ser_spot_mean_per_well	nonborder_mitosmooth_radial_relative_deviation_ser_spot_mean_per_well	d	MitoTracker	cell	distribution	asymptote	asymptote	NA	baseline	baseline cell MitoTracker distribution
658	1	pheno1	12	87.131543	6.372328468	86.341384	88.541689	d_nonborder_mitosmooth_radial_relative_deviation_ser_valley_mean_per_well	nonborder_mitosmooth_radial_relative_deviation_ser_valley_mean_per_well	d	MitoTracker	cell	distribution	asymptote	asymptote	NA	baseline	baseline cell MitoTracker distribution
659	1	pheno1	9	107.010224	6.64331046	106.098311	107.681208	d_nonborder_mitosmooth_ratio_width_to_length_mean_per_well	nonborder_mitosmooth_ratio_width_to_length_mean_per_well	d	MitoTracker	cell	shape	asymptote	asymptote	maximum response	maximum response	maximum response cell MitoTracker shape
660	1	pheno1	9	107.480167	6.406320712	106.187558	107.606558	d_nonborder_mitosmooth_roundness_mean_per_well	nonborder_mitosmooth_roundness_mean_per_well	d	MitoTracker	cell	shape	asymptote	asymptote	maximum response	maximum response	maximum response cell MitoTracker shape
661	1	pheno1	10	85.752204	6.921336495	85.521847	86.467023	d_nonborder_mitosmooth_symmetry_02_mean_per_well	nonborder_mitosmooth_symmetry_02_mean_per_well	d	MitoTracker	cell	distribution	asymptote	asymptote	NA	baseline	baseline cell MitoTracker distribution
662	1	pheno1	12	86.698513	6.069469488	83.373246	88.897927	d_nonborder_mitosmooth_symmetry_02_ser_bright_mean_per_well	nonborder_mitosmooth_symmetry_02_ser_bright_mean_per_well	d	MitoTracker	cell	distribution	asymptote	asymptote	NA	baseline	baseline cell MitoTracker distribution
663	1	pheno1	12	87.062788	7.742622787	86.424205	88.603302	d_nonborder_mitosmooth_symmetry_02_ser_dark_mean_per_well	nonborder_mitosmooth_symmetry_02_ser_dark_mean_per_well	d	MitoTracker	cell	distribution	asymptote	asymptote	NA	baseline	baseline cell MitoTracker distribution
664	1	pheno1	2	148.452407	5.930634531	132.49791	150.275053	d_nonborder_mitosmooth_symmetry_02_ser_edge_mean_per_well	nonborder_mitosmooth_symmetry_02_ser_edge_mean_per_well	d	MitoTracker	cell	distribution	asymptote	asymptote	NA	baseline	baseline cell MitoTracker distribution
665	1	pheno1	1	25.660496	6.197668667	25.53644	43.65181	d_nonborder_mitosmooth_symmetry_02_ser_hole_mean_per_well	nonborder_mitosmooth_symmetry_02_ser_hole_mean_per_well	d	MitoTracker	cell	distribution	asymptote	asymptote	NA	baseline	baseline cell MitoTracker distribution
666	1	pheno1	1	25.641993	6.759348888	25.241379	37.67063	d_nonborder_mitosmooth_symmetry_02_ser_ridge_mean_per_well	nonborder_mitosmooth_symmetry_02_ser_ridge_mean_per_well	d	MitoTracker	cell	distribution	asymptote	asymptote	NA	baseline	baseline cell MitoTracker distribution
667	1	pheno1	12	86.681898	7.647885456	86.181126	88.680312	d_nonborder_mitosmooth_symmetry_02_ser_saddle_mean_per_well	nonborder_mitosmooth_symmetry_02_ser_saddle_mean_per_well	d	MitoTracker	cell	distribution	asymptote	asymptote	NA	baseline	baseline cell MitoTracker distribution
668	1	pheno1	1	25.641993	7.041473822	24.521247	38.323059	d_nonborder_mitosmooth_symmetry_02_ser_spot_mean_per_well	nonborder_mitosmooth_symmetry_02_ser_spot_mean_per_well	d	MitoTracker	cell	distribution	asymptote	asymptote	NA	baseline	baseline cell MitoTracker distribution
669	1	pheno1	2	148.556213	7.31968259	148.196578	149.862893	d_nonborder_mitosmooth_symmetry_02_ser_valley_mean_per_well	nonborder_mitosmooth_symmetry_02_ser_valley_mean_per_well	d	MitoTracker	cell	distribution	asymptote	asymptote	NA	baseline	baseline cell MitoTracker distribution
670	1	pheno1	13	47.20204	5.810605607	47.171658	79.203315	d_nonborder_mitosmooth_symmetry_03_mean_per_well	nonborder_mitosmooth_symmetry_03_mean_per_well	d	MitoTracker	cell	distribution	asymptote	asymptote	NA	baseline	baseline cell MitoTracker distribution
671	1	pheno1	6	60.587574	5.952983578	21.293054	62.83696	d_nonborder_mitosmooth_symmetry_03_ser_bright_mean_per_well	nonborder_mitosmooth_symmetry_03_ser_bright_mean_per_well	d	MitoTracker	cell	distribution	asymptote	asymptote	maximum response	maximum response	maximum response cell MitoTracker distribution
672	1	pheno1	19	17.498841	7.614123692	17.122189	20.867543	d_nonborder_mitosmooth_symmetry_03_ser_dark_mean_per_well	nonborder_mitosmooth_symmetry_03_ser_dark_mean_per_well	d	MitoTracker	cell	distribution	asymptote	asymptote	NA	baseline	baseline cell MitoTracker distribution
673	1	pheno1	9	108.260846	6.416168212	107.68753	108.96924	d_nonborder_mitosmooth_symmetry_03_ser_edge_mean_per_well	nonborder_mitosmooth_symmetry_03_ser_edge_mean_per_well	d	MitoTracker	cell	distribution	asymptote	asymptote	NA	baseline	baseline cell MitoTracker distribution
674	1	pheno1	X	114.159505	5.761294772	69.402384	120.215987	d_nonborder_mitosmooth_symmetry_03_ser_hole_mean_per_well	nonborder_mitosmooth_symmetry_03_ser_hole_mean_per_well	d	MitoTracker	cell	distribution	asymptote	asymptote	maximum response	maximum response	maximum response cell MitoTracker distribution
675	1	pheno1	6	22.49081	5.478626514	15.231077	68.789361	d_nonborder_mitosmooth_symmetry_03_ser_ridge_mean_per_well	nonborder_mitosmooth_symmetry_03_ser_ridge_mean_per_well	d	MitoTracker	cell	distribution	asymptote	asymptote	maximum response	maximum response	maximum response cell MitoTracker distribution
676	1	pheno1	17	83.255742	6.079629444	75.375347	83.366449	d_nonborder_mitosmooth_symmetry_03_ser_saddle_mean_per_well	nonborder_mitosmooth_symmetry_03_ser_saddle_mean_per_well	d	MitoTracker	cell	distribution	asymptote	asymptote	maximum response	maximum response	maximum response cell MitoTracker distribution
677	1	pheno1	4	78.253225	6.788156735	76.137953	78.531263	d_nonborder_mitosmooth_symmetry_03_ser_spot_mean_per_well	nonborder_mitosmooth_symmetry_03_ser_spot_mean_per_well	d	MitoTracker	cell	distribution	asymptote	asymptote	maximum response	maximum response	maximum response cell MitoTracker distribution
678	1	pheno1	2	128.131278	6.18740206	127.283909	158.38547	d_nonborder_mitosmooth_symmetry_03_ser_valley_mean_per_well	nonborder_mitosmooth_symmetry_03_ser_valley_mean_per_well	d	MitoTracker	cell	distribution	asymptote	asymptote	NA	baseline	baseline cell MitoTracker distribution
679	1	pheno1	19	10.672116	7.67431922	10.167257	11.101641	d_nonborder_mitosmooth_symmetry_04_mean_per_well	nonborder_mitosmooth_symmetry_04_mean_per_well	d	MitoTracker	cell	distribution	asymptote	asymptote	NA	baseline	baseline cell MitoTracker distribution
680	1	pheno1	4	57.759851	6.665536287	56.891893	58.279194	d_nonborder_mitosmooth_symmetry_04_ser_bright_mean_per_well	nonborder_mitosmooth_symmetry_04_ser_bright_mean_per_well	d	MitoTracker	cell	distribution	asymptote	asymptote	NA	baseline	baseline cell MitoTracker distribution
681	1	pheno1	2	148.578178	7.677725897	148.196578	148.892719	d_nonborder_mitosmooth_symmetry_04_ser_dark_mean_per_well	nonborder_mitosmooth_symmetry_04_ser_dark_mean_per_well	d	MitoTracker	cell	distribution	asymptote	asymptote	NA	baseline	baseline cell MitoTracker distribution
682	1	pheno1	2	148.556213	6.375971397	148.196578	150.818471	d_nonborder_mitosmooth_symmetry_04_ser_edge_mean_per_well	nonborder_mitosmooth_symmetry_04_ser_edge_mean_per_well	d	MitoTracker	cell	distribution	asymptote	asymptote	NA	baseline	baseline cell MitoTracker distribution
683	1	pheno1	11	95.072342	6.053383658	94.793694	98.956394	d_nonborder_mitosmooth_symmetry_04_ser_hole_mean_per_well	nonborder_mitosmooth_symmetry_04_ser_hole_mean_per_well	d	MitoTracker	cell	distribution	asymptote	asymptote	maximum response	maximum response	maximum response cell MitoTracker distribution
684	1	pheno1	13	71.472754	6.493745103	40.721291	71.706515	d_nonborder_mitosmooth_symmetry_04_ser_ridge_mean_per_well	nonborder_mitosmooth_symmetry_04_ser_ridge_mean_per_well	d	MitoTracker	cell	distribution	asymptote	asymptote	NA	baseline	baseline cell MitoTracker distribution
685	1	pheno1	10	86.307484	6.407261647	85.592232	86.704272	d_nonborder_mitosmooth_symmetry_04_ser_saddle_mean_per_well	nonborder_mitosmooth_symmetry_04_ser_saddle_mean_per_well	d	MitoTracker	cell	distribution	asymptote	asymptote	NA	baseline	baseline cell MitoTracker distribution
686	1	pheno1	19	55.680954	6.620251612	55.540058	55.753392	d_nonborder_mitosmooth_symmetry_04_ser_spot_mean_per_well	nonborder_mitosmooth_symmetry_04_ser_spot_mean_per_well	d	MitoTracker	cell	distribution	asymptote	asymptote	NA	baseline	baseline cell MitoTracker distribution
687	1	pheno1	4	77.835198	8.025114065	76.077455	78.318479	d_nonborder_mitosmooth_symmetry_04_ser_valley_mean_per_well	nonborder_mitosmooth_symmetry_04_ser_valley_mean_per_well	d	MitoTracker	cell	distribution	asymptote	asymptote	NA	baseline	baseline cell MitoTracker distribution
688	1	pheno1	1	26.047253	6.459606891	23.635672	29.028517	d_nonborder_mitosmooth_symmetry_05_mean_per_well	nonborder_mitosmooth_symmetry_05_mean_per_well	d	MitoTracker	cell	distribution	asymptote	asymptote	NA	baseline	baseline cell MitoTracker distribution
689	1	pheno1	19	55.572826	7.995471837	54.99388	55.703524	d_nonborder_mitosmooth_symmetry_05_ser_bright_mean_per_well	nonborder_mitosmooth_symmetry_05_ser_bright_mean_per_well	d	MitoTracker	cell	distribution	asymptote	asymptote	maximum response	maximum response	maximum response cell MitoTracker distribution
690	1	pheno1	12	105.824701	7.961456869	104.978623	119.468457	d_nonborder_mitosmooth_symmetry_05_ser_dark_mean_per_well	nonborder_mitosmooth_symmetry_05_ser_dark_mean_per_well	d	MitoTracker	cell	distribution	asymptote	asymptote	NA	baseline	baseline cell MitoTracker distribution
691	1	pheno1	19	17.666891	6.498565493	10.668148	20.88509	d_nonborder_mitosmooth_symmetry_05_ser_edge_mean_per_well	nonborder_mitosmooth_symmetry_05_ser_edge_mean_per_well	d	MitoTracker	cell	distribution	asymptote	asymptote	NA	baseline	baseline cell MitoTracker distribution
692	1	pheno1	4	49.538134	5.874436483	39.031376	55.66127	d_nonborder_mitosmooth_symmetry_05_ser_hole_mean_per_well	nonborder_mitosmooth_symmetry_05_ser_hole_mean_per_well	d	MitoTracker	cell	distribution	asymptote	asymptote	maximum response	maximum response	maximum response cell MitoTracker distribution
693	1	pheno1	19	55.147033	6.949494868	34.649025	55.686793	d_nonborder_mitosmooth_symmetry_05_ser_ridge_mean_per_well	nonborder_mitosmooth_symmetry_05_ser_ridge_mean_per_well	d	MitoTracker	cell	distribution	asymptote	asymptote	maximum response	maximum response	maximum response cell MitoTracker distribution
694	1	pheno1	15	37.714261	6.163225925	34.951227	37.998995	d_nonborder_mitosmooth_symmetry_05_ser_saddle_mean_per_well	nonborder_mitosmooth_symmetry_05_ser_saddle_mean_per_well	d	MitoTracker	cell	distribution	asymptote	asymptote	NA	baseline	baseline cell MitoTracker distribution
695	1	pheno1	18	10.811487	6.305826224	10.457163	12.450136	d_nonborder_mitosmooth_symmetry_05_ser_spot_mean_per_well	nonborder_mitosmooth_symmetry_05_ser_spot_mean_per_well	d	MitoTracker	cell	distribution	asymptote	asymptote	maximum response	maximum response	maximum response cell MitoTracker distribution
696	1	pheno1	19	17.498841	7.717617347	17.211021	18.955364	d_nonborder_mitosmooth_symmetry_05_ser_valley_mean_per_well	nonborder_mitosmooth_symmetry_05_ser_valley_mean_per_well	d	MitoTracker	cell	distribution	asymptote	asymptote	NA	baseline	baseline cell MitoTracker distribution
697	1	pheno1	1	25.641993	7.075972682	23.173319	36.105883	d_nonborder_mitosmooth_symmetry_12_mean_per_well	nonborder_mitosmooth_symmetry_12_mean_per_well	d	MitoTracker	cell	distribution	asymptote	asymptote	NA	baseline	baseline cell MitoTracker distribution
698	1	pheno1	1	25.641993	7.681951545	24.567974	37.63925	d_nonborder_mitosmooth_symmetry_12_ser_bright_mean_per_well	nonborder_mitosmooth_symmetry_12_ser_bright_mean_per_well	d	MitoTracker	cell	distribution	asymptote	asymptote	NA	baseline	baseline cell MitoTracker distribution
699	1	pheno1	12	87.062788	7.42002143	86.424205	88.603302	d_nonborder_mitosmooth_symmetry_12_ser_dark_mean_per_well	nonborder_mitosmooth_symmetry_12_ser_dark_mean_per_well	d	MitoTracker	cell	distribution	asymptote	asymptote	NA	baseline	baseline cell MitoTracker distribution
700	1	pheno1	12	86.915802	6.281667696	86.209895	88.904584	d_nonborder_mitosmooth_symmetry_12_ser_edge_mean_per_well	nonborder_mitosmooth_symmetry_12_ser_edge_mean_per_well	d	MitoTracker	cell	distribution	asymptote	asymptote	NA	baseline	baseline cell MitoTracker distribution
701	1	pheno1	12	86.915802	7.091297121	84.728824	88.904584	d_nonborder_mitosmooth_symmetry_12_ser_hole_mean_per_well	nonborder_mitosmooth_symmetry_12_ser_hole_mean_per_well	d	MitoTracker	cell	distribution	asymptote	asymptote	NA	baseline	baseline cell MitoTracker distribution
702	1	pheno1	1	25.641993	7.905453559	25.387525	37.63925	d_nonborder_mitosmooth_symmetry_12_ser_ridge_mean_per_well	nonborder_mitosmooth_symmetry_12_ser_ridge_mean_per_well	d	MitoTracker	cell	distribution	asymptote	asymptote	NA	baseline	baseline cell MitoTracker distribution
703	1	pheno1	12	88.202601	6.542939616	84.66256	88.904584	d_nonborder_mitosmooth_symmetry_12_ser_saddle_mean_per_well	nonborder_mitosmooth_symmetry_12_ser_saddle_mean_per_well	d	MitoTracker	cell	distribution	asymptote	asymptote	NA	baseline	baseline cell MitoTracker distribution
704	1	pheno1	1	25.641993	6.914114497	24.521247	38.391811	d_nonborder_mitosmooth_symmetry_12_ser_spot_mean_per_well	nonborder_mitosmooth_symmetry_12_ser_spot_mean_per_well	d	MitoTracker	cell	distribution	asymptote	asymptote	NA	baseline	baseline cell MitoTracker distribution
705	1	pheno1	12	87.062788	6.782421565	86.424205	88.603302	d_nonborder_mitosmooth_symmetry_12_ser_valley_mean_per_well	nonborder_mitosmooth_symmetry_12_ser_valley_mean_per_well	d	MitoTracker	cell	distribution	asymptote	asymptote	NA	baseline	baseline cell MitoTracker distribution
706	1	pheno1	16	31.828754	6.966781365	31.063567	32.538769	d_nonborder_mitosmooth_symmetry_13_mean_per_well	nonborder_mitosmooth_symmetry_13_mean_per_well	d	MitoTracker	cell	distribution	asymptote	asymptote	NA	baseline	baseline cell MitoTracker distribution
707	1	pheno1	3	143.56329	6.046894941	52.811668	144.05696	d_nonborder_mitosmooth_symmetry_13_ser_bright_mean_per_well	nonborder_mitosmooth_symmetry_13_ser_bright_mean_per_well	d	MitoTracker	cell	distribution	asymptote	asymptote	maximum response	maximum response	maximum response cell MitoTracker distribution
708	1	pheno1	19	17.636434	7.233691592	17.211021	20.813325	d_nonborder_mitosmooth_symmetry_13_ser_dark_mean_per_well	nonborder_mitosmooth_symmetry_13_ser_dark_mean_per_well	d	MitoTracker	cell	distribution	asymptote	asymptote	NA	baseline	baseline cell MitoTracker distribution
709	1	pheno1	2	102.119248	6.745281026	101.802511	102.195074	d_nonborder_mitosmooth_symmetry_13_ser_edge_mean_per_well	nonborder_mitosmooth_symmetry_13_ser_edge_mean_per_well	d	MitoTracker	cell	distribution	asymptote	asymptote	NA	baseline	baseline cell MitoTracker distribution
710	1	pheno1	3	145.270107	7.224870317	143.561536	145.747801	d_nonborder_mitosmooth_symmetry_13_ser_hole_mean_per_well	nonborder_mitosmooth_symmetry_13_ser_hole_mean_per_well	d	MitoTracker	cell	distribution	asymptote	asymptote	maximum response	maximum response	maximum response cell MitoTracker distribution
711	1	pheno1	X	99.261027	6.162239422	99.029105	100.576111	d_nonborder_mitosmooth_symmetry_13_ser_ridge_mean_per_well	nonborder_mitosmooth_symmetry_13_ser_ridge_mean_per_well	d	MitoTracker	cell	distribution	asymptote	asymptote	maximum response	maximum response	maximum response cell MitoTracker distribution
712	1	pheno1	4	67.828361	5.948321212	65.263594	78.318479	d_nonborder_mitosmooth_symmetry_13_ser_spot_mean_per_well	nonborder_mitosmooth_symmetry_13_ser_spot_mean_per_well	d	MitoTracker	cell	distribution	asymptote	asymptote	maximum response	maximum response	maximum response cell MitoTracker distribution
713	1	pheno1	19	17.498841	7.116230061	17.413024	18.32221	d_nonborder_mitosmooth_symmetry_13_ser_valley_mean_per_well	nonborder_mitosmooth_symmetry_13_ser_valley_mean_per_well	d	MitoTracker	cell	distribution	asymptote	asymptote	NA	baseline	baseline cell MitoTracker distribution
714	1	pheno1	1	25.641993	6.904845876	24.098293	26.721717	d_nonborder_mitosmooth_symmetry_14_mean_per_well	nonborder_mitosmooth_symmetry_14_mean_per_well	d	MitoTracker	cell	distribution	asymptote	asymptote	NA	baseline	baseline cell MitoTracker distribution
715	1	pheno1	1	25.509963	6.280283322	24.527415	36.565686	d_nonborder_mitosmooth_symmetry_14_ser_bright_mean_per_well	nonborder_mitosmooth_symmetry_14_ser_bright_mean_per_well	d	MitoTracker	cell	distribution	asymptote	asymptote	NA	baseline	baseline cell MitoTracker distribution
716	1	pheno1	2	148.578178	7.101267484	148.196578	148.892719	d_nonborder_mitosmooth_symmetry_14_ser_dark_mean_per_well	nonborder_mitosmooth_symmetry_14_ser_dark_mean_per_well	d	MitoTracker	cell	distribution	asymptote	asymptote	NA	baseline	baseline cell MitoTracker distribution
717	1	pheno1	15	25.370892	6.329451764	23.814132	25.751022	d_nonborder_mitosmooth_symmetry_14_ser_edge_mean_per_well	nonborder_mitosmooth_symmetry_14_ser_edge_mean_per_well	d	MitoTracker	cell	distribution	asymptote	asymptote	NA	baseline	baseline cell MitoTracker distribution
718	1	pheno1	1	25.660496	7.055737696	25.545258	43.202938	d_nonborder_mitosmooth_symmetry_14_ser_hole_mean_per_well	nonborder_mitosmooth_symmetry_14_ser_hole_mean_per_well	d	MitoTracker	cell	distribution	asymptote	asymptote	NA	baseline	baseline cell MitoTracker distribution
719	1	pheno1	1	25.509963	7.64949678	24.527415	26.856598	d_nonborder_mitosmooth_symmetry_14_ser_ridge_mean_per_well	nonborder_mitosmooth_symmetry_14_ser_ridge_mean_per_well	d	MitoTracker	cell	distribution	asymptote	asymptote	NA	baseline	baseline cell MitoTracker distribution
720	1	pheno1	10	86.349302	6.425067672	85.592232	87.085932	d_nonborder_mitosmooth_symmetry_14_ser_saddle_mean_per_well	nonborder_mitosmooth_symmetry_14_ser_saddle_mean_per_well	d	MitoTracker	cell	distribution	asymptote	asymptote	NA	baseline	baseline cell MitoTracker distribution
721	1	pheno1	14	75.258212	6.963970131	74.871442	75.471332	d_nonborder_mitosmooth_symmetry_14_ser_spot_mean_per_well	nonborder_mitosmooth_symmetry_14_ser_spot_mean_per_well	d	MitoTracker	cell	distribution	asymptote	asymptote	NA	baseline	baseline cell MitoTracker distribution
722	1	pheno1	2	148.578178	6.88373648	148.196578	150.739209	d_nonborder_mitosmooth_symmetry_14_ser_valley_mean_per_well	nonborder_mitosmooth_symmetry_14_ser_valley_mean_per_well	d	MitoTracker	cell	distribution	asymptote	asymptote	NA	baseline	baseline cell MitoTracker distribution
723	1	pheno1	1	25.660496	7.436895029	25.284899	29.024924	d_nonborder_mitosmooth_symmetry_15_mean_per_well	nonborder_mitosmooth_symmetry_15_mean_per_well	d	MitoTracker	cell	distribution	asymptote	asymptote	NA	baseline	baseline cell MitoTracker distribution
724	1	pheno1	19	54.99388	6.665283801	54.259274	55.680954	d_nonborder_mitosmooth_symmetry_15_ser_bright_mean_per_well	nonborder_mitosmooth_symmetry_15_ser_bright_mean_per_well	d	MitoTracker	cell	distribution	asymptote	asymptote	NA	baseline	baseline cell MitoTracker distribution
725	1	pheno1	2	150.783848	7.485987034	148.196578	152.74809	d_nonborder_mitosmooth_symmetry_15_ser_dark_mean_per_well	nonborder_mitosmooth_symmetry_15_ser_dark_mean_per_well	d	MitoTracker	cell	distribution	asymptote	asymptote	NA	baseline	baseline cell MitoTracker distribution
726	1	pheno1	1	25.641993	6.452238538	25.387525	28.353454	d_nonborder_mitosmooth_symmetry_15_ser_edge_mean_per_well	nonborder_mitosmooth_symmetry_15_ser_edge_mean_per_well	d	MitoTracker	cell	distribution	asymptote	asymptote	NA	baseline	baseline cell MitoTracker distribution
727	1	pheno1	8	90.209857	7.743861553	89.094303	91.272843	d_nonborder_mitosmooth_symmetry_15_ser_hole_mean_per_well	nonborder_mitosmooth_symmetry_15_ser_hole_mean_per_well	d	MitoTracker	cell	distribution	asymptote	asymptote	maximum response	maximum response	maximum response cell MitoTracker distribution
728	1	pheno1	6	63.762854	8.120987526	60.976596	64.821499	d_nonborder_mitosmooth_symmetry_15_ser_ridge_mean_per_well	nonborder_mitosmooth_symmetry_15_ser_ridge_mean_per_well	d	MitoTracker	cell	distribution	asymptote	asymptote	NA	baseline	baseline cell MitoTracker distribution
729	1	pheno1	13	40.741808	7.778447693	40.66534	41.375034	d_nonborder_mitosmooth_symmetry_15_ser_saddle_mean_per_well	nonborder_mitosmooth_symmetry_15_ser_saddle_mean_per_well	d	MitoTracker	cell	distribution	asymptote	asymptote	NA	baseline	baseline cell MitoTracker distribution
730	1	pheno1	4	57.885099	6.520024918	57.43992	63.019978	d_nonborder_mitosmooth_symmetry_15_ser_spot_mean_per_well	nonborder_mitosmooth_symmetry_15_ser_spot_mean_per_well	d	MitoTracker	cell	distribution	asymptote	asymptote	maximum response	maximum response	maximum response cell MitoTracker distribution
731	1	pheno1	2	150.783848	7.411472034	148.196578	152.765413	d_nonborder_mitosmooth_symmetry_15_ser_valley_mean_per_well	nonborder_mitosmooth_symmetry_15_ser_valley_mean_per_well	d	MitoTracker	cell	distribution	asymptote	asymptote	NA	baseline	baseline cell MitoTracker distribution
732	1	pheno1	13	37.104661	5.961723163	36.963087	38.31464	d_nonborder_mitosmooth_threshold_compactness_30_percent_mean_per_well	nonborder_mitosmooth_threshold_compactness_30_percent_mean_per_well	d	MitoTracker	cell	compactness	asymptote	asymptote	maximum response	maximum response	maximum response cell MitoTracker compactness
733	1	pheno1	4	127.723274	6.123976159	126.449342	128.127398	d_nonborder_mitosmooth_threshold_compactness_30_percent_ser_bright_mean_per_well	nonborder_mitosmooth_threshold_compactness_30_percent_ser_bright_mean_per_well	d	MitoTracker	cell	compactness	asymptote	asymptote	maximum response	maximum response	maximum response cell MitoTracker compactness
734	1	pheno1	17	34.883235	5.523154187	31.73617	67.409284	d_nonborder_mitosmooth_threshold_compactness_30_percent_ser_dark_mean_per_well	nonborder_mitosmooth_threshold_compactness_30_percent_ser_dark_mean_per_well	d	MitoTracker	cell	compactness	asymptote	asymptote	maximum response	maximum response	maximum response cell MitoTracker compactness
735	1	pheno1	17	34.883235	5.708978513	31.296794	67.409284	d_nonborder_mitosmooth_threshold_compactness_30_percent_ser_edge_mean_per_well	nonborder_mitosmooth_threshold_compactness_30_percent_ser_edge_mean_per_well	d	MitoTracker	cell	compactness	asymptote	asymptote	maximum response	maximum response	maximum response cell MitoTracker compactness
736	1	pheno1	9	107.63713	5.428987469	99.363348	107.68753	d_nonborder_mitosmooth_threshold_compactness_30_percent_ser_hole_mean_per_well	nonborder_mitosmooth_threshold_compactness_30_percent_ser_hole_mean_per_well	d	MitoTracker	cell	compactness	asymptote	asymptote	maximum response	maximum response	maximum response cell MitoTracker compactness
737	1	pheno1	4	127.723274	6.70919127	127.587323	128.24731	d_nonborder_mitosmooth_threshold_compactness_30_percent_ser_ridge_mean_per_well	nonborder_mitosmooth_threshold_compactness_30_percent_ser_ridge_mean_per_well	d	MitoTracker	cell	compactness	asymptote	asymptote	maximum response	maximum response	maximum response cell MitoTracker compactness
738	1	pheno1	X	115.728122	5.754415446	69.402384	120.184195	d_nonborder_mitosmooth_threshold_compactness_30_percent_ser_saddle_mean_per_well	nonborder_mitosmooth_threshold_compactness_30_percent_ser_saddle_mean_per_well	d	MitoTracker	cell	compactness	asymptote	asymptote	maximum response	maximum response	maximum response cell MitoTracker compactness
739	1	pheno1	5	50.525221	6.510831101	49.48596	51.788074	d_nonborder_mitosmooth_threshold_compactness_30_percent_ser_spot_mean_per_well	nonborder_mitosmooth_threshold_compactness_30_percent_ser_spot_mean_per_well	d	MitoTracker	cell	compactness	asymptote	asymptote	maximum response	maximum response	maximum response cell MitoTracker compactness
740	1	pheno1	2	181.768978	5.362089559	170.26924	181.998284	d_nonborder_mitosmooth_threshold_compactness_30_percent_ser_valley_mean_per_well	nonborder_mitosmooth_threshold_compactness_30_percent_ser_valley_mean_per_well	d	MitoTracker	cell	compactness	asymptote	asymptote	maximum response	maximum response	maximum response cell MitoTracker compactness
741	1	pheno1	13	37.817068	6.398996025	37.003386	38.31464	d_nonborder_mitosmooth_threshold_compactness_40_percent_mean_per_well	nonborder_mitosmooth_threshold_compactness_40_percent_mean_per_well	d	MitoTracker	cell	compactness	asymptote	asymptote	maximum response	maximum response	maximum response cell MitoTracker compactness
742	1	pheno1	4	127.723274	5.571081325	38.980055	154.996667	d_nonborder_mitosmooth_threshold_compactness_40_percent_ser_bright_mean_per_well	nonborder_mitosmooth_threshold_compactness_40_percent_ser_bright_mean_per_well	d	MitoTracker	cell	compactness	asymptote	asymptote	maximum response	maximum response	maximum response cell MitoTracker compactness
743	1	pheno1	X	114.231283	5.714690425	3.859005	130.321726	d_nonborder_mitosmooth_threshold_compactness_40_percent_ser_dark_mean_per_well	nonborder_mitosmooth_threshold_compactness_40_percent_ser_dark_mean_per_well	d	MitoTracker	cell	compactness	asymptote	asymptote	maximum response	maximum response	maximum response cell MitoTracker compactness
744	1	pheno1	17	34.883235	5.27780819	31.289464	67.409284	d_nonborder_mitosmooth_threshold_compactness_40_percent_ser_edge_mean_per_well	nonborder_mitosmooth_threshold_compactness_40_percent_ser_edge_mean_per_well	d	MitoTracker	cell	compactness	asymptote	asymptote	maximum response	maximum response	maximum response cell MitoTracker compactness
745	1	pheno1	9	107.659764	5.560620309	99.69038	107.694961	d_nonborder_mitosmooth_threshold_compactness_40_percent_ser_hole_mean_per_well	nonborder_mitosmooth_threshold_compactness_40_percent_ser_hole_mean_per_well	d	MitoTracker	cell	compactness	asymptote	asymptote	maximum response	maximum response	maximum response cell MitoTracker compactness
746	1	pheno1	4	127.692037	6.500985978	126.783128	128.31468	d_nonborder_mitosmooth_threshold_compactness_40_percent_ser_ridge_mean_per_well	nonborder_mitosmooth_threshold_compactness_40_percent_ser_ridge_mean_per_well	d	MitoTracker	cell	compactness	asymptote	asymptote	maximum response	maximum response	maximum response cell MitoTracker compactness
747	1	pheno1	4	127.692037	6.282849867	126.358966	128.298146	d_nonborder_mitosmooth_threshold_compactness_40_percent_ser_saddle_mean_per_well	nonborder_mitosmooth_threshold_compactness_40_percent_ser_saddle_mean_per_well	d	MitoTracker	cell	compactness	asymptote	asymptote	maximum response	maximum response	maximum response cell MitoTracker compactness
748	1	pheno1	4	39.969381	6.36292956	38.089461	128.127398	d_nonborder_mitosmooth_threshold_compactness_40_percent_ser_spot_mean_per_well	nonborder_mitosmooth_threshold_compactness_40_percent_ser_spot_mean_per_well	d	MitoTracker	cell	compactness	asymptote	asymptote	maximum response	maximum response	maximum response cell MitoTracker compactness
749	1	pheno1	17	34.883235	6.259281422	34.182168	35.331061	d_nonborder_mitosmooth_threshold_compactness_40_percent_ser_valley_mean_per_well	nonborder_mitosmooth_threshold_compactness_40_percent_ser_valley_mean_per_well	d	MitoTracker	cell	compactness	asymptote	asymptote	maximum response	maximum response	maximum response cell MitoTracker compactness
750	1	pheno1	13	37.104661	5.962152169	36.963087	38.31464	d_nonborder_mitosmooth_threshold_compactness_50_percent_mean_per_well	nonborder_mitosmooth_threshold_compactness_50_percent_mean_per_well	d	MitoTracker	cell	compactness	asymptote	asymptote	maximum response	maximum response	maximum response cell MitoTracker compactness
751	1	pheno1	5	50.15392	6.31924892	49.453684	51.193401	d_nonborder_mitosmooth_threshold_compactness_50_percent_ser_bright_mean_per_well	nonborder_mitosmooth_threshold_compactness_50_percent_ser_bright_mean_per_well	d	MitoTracker	cell	compactness	asymptote	asymptote	maximum response	maximum response	maximum response cell MitoTracker compactness
752	1	pheno1	X	130.193368	7.267073441	113.04328	130.442438	d_nonborder_mitosmooth_threshold_compactness_50_percent_ser_dark_mean_per_well	nonborder_mitosmooth_threshold_compactness_50_percent_ser_dark_mean_per_well	d	MitoTracker	cell	compactness	asymptote	asymptote	maximum response	maximum response	maximum response cell MitoTracker compactness
753	1	pheno1	9	99.69038	5.396225832	99.363348	101.379229	d_nonborder_mitosmooth_threshold_compactness_50_percent_ser_edge_mean_per_well	nonborder_mitosmooth_threshold_compactness_50_percent_ser_edge_mean_per_well	d	MitoTracker	cell	compactness	asymptote	asymptote	maximum response	maximum response	maximum response cell MitoTracker compactness
754	1	pheno1	3	89.603912	5.835819722	88.52759	90.43814	d_nonborder_mitosmooth_threshold_compactness_50_percent_ser_hole_mean_per_well	nonborder_mitosmooth_threshold_compactness_50_percent_ser_hole_mean_per_well	d	MitoTracker	cell	compactness	asymptote	asymptote	maximum response	maximum response	maximum response cell MitoTracker compactness
755	1	pheno1	10	123.729033	5.648648591	43.777842	124.182328	d_nonborder_mitosmooth_threshold_compactness_50_percent_ser_ridge_mean_per_well	nonborder_mitosmooth_threshold_compactness_50_percent_ser_ridge_mean_per_well	d	MitoTracker	cell	compactness	asymptote	asymptote	maximum response	maximum response	maximum response cell MitoTracker compactness
756	1	pheno1	12	73.619368	7.060829159	15.865731	74.951723	d_nonborder_mitosmooth_threshold_compactness_50_percent_ser_saddle_mean_per_well	nonborder_mitosmooth_threshold_compactness_50_percent_ser_saddle_mean_per_well	d	MitoTracker	cell	compactness	asymptote	asymptote	maximum response	maximum response	maximum response cell MitoTracker compactness
757	1	pheno1	15	101.896502	6.565261291	100.95458	102.261468	d_nonborder_mitosmooth_threshold_compactness_50_percent_ser_spot_mean_per_well	nonborder_mitosmooth_threshold_compactness_50_percent_ser_spot_mean_per_well	d	MitoTracker	cell	compactness	asymptote	asymptote	maximum response	maximum response	maximum response cell MitoTracker compactness
758	1	pheno1	10	11.283093	5.959901537	7.004508	56.968201	d_nonborder_mitosmooth_threshold_compactness_50_percent_ser_valley_mean_per_well	nonborder_mitosmooth_threshold_compactness_50_percent_ser_valley_mean_per_well	d	MitoTracker	cell	compactness	asymptote	asymptote	maximum response	maximum response	maximum response cell MitoTracker compactness
759	1	pheno1	18	81.395512	5.910533945	71.482476	81.521464	d_nonborder_mitosmooth_threshold_compactness_60_percent_mean_per_well	nonborder_mitosmooth_threshold_compactness_60_percent_mean_per_well	d	MitoTracker	cell	compactness	asymptote	asymptote	maximum response	maximum response	maximum response cell MitoTracker compactness
760	1	pheno1	5	50.241412	6.342942579	19.673744	51.206134	d_nonborder_mitosmooth_threshold_compactness_60_percent_ser_bright_mean_per_well	nonborder_mitosmooth_threshold_compactness_60_percent_ser_bright_mean_per_well	d	MitoTracker	cell	compactness	asymptote	asymptote	maximum response	maximum response	maximum response cell MitoTracker compactness
761	1	pheno1	7	87.729268	6.900436485	87.226764	92.545195	d_nonborder_mitosmooth_threshold_compactness_60_percent_ser_dark_mean_per_well	nonborder_mitosmooth_threshold_compactness_60_percent_ser_dark_mean_per_well	d	MitoTracker	cell	compactness	asymptote	asymptote	maximum response	maximum response	maximum response cell MitoTracker compactness
762	1	pheno1	7	92.027835	6.434381953	89.522474	128.201038	d_nonborder_mitosmooth_threshold_compactness_60_percent_ser_edge_mean_per_well	nonborder_mitosmooth_threshold_compactness_60_percent_ser_edge_mean_per_well	d	MitoTracker	cell	compactness	asymptote	asymptote	maximum response	maximum response	maximum response cell MitoTracker compactness
763	1	pheno1	X	116.439898	6.239040577	69.994216	120.345288	d_nonborder_mitosmooth_threshold_compactness_60_percent_ser_hole_mean_per_well	nonborder_mitosmooth_threshold_compactness_60_percent_ser_hole_mean_per_well	d	MitoTracker	cell	compactness	asymptote	asymptote	maximum response	maximum response	maximum response cell MitoTracker compactness
764	1	pheno1	12	34.685397	6.127053496	33.578302	40.279201	d_nonborder_mitosmooth_threshold_compactness_60_percent_ser_ridge_mean_per_well	nonborder_mitosmooth_threshold_compactness_60_percent_ser_ridge_mean_per_well	d	MitoTracker	cell	compactness	asymptote	asymptote	maximum response	maximum response	maximum response cell MitoTracker compactness
765	1	pheno1	12	74.086676	7.315143024	15.89116	75.054712	d_nonborder_mitosmooth_threshold_compactness_60_percent_ser_saddle_mean_per_well	nonborder_mitosmooth_threshold_compactness_60_percent_ser_saddle_mean_per_well	d	MitoTracker	cell	compactness	asymptote	asymptote	maximum response	maximum response	maximum response cell MitoTracker compactness
766	1	pheno1	1	75.30083	6.063891365	74.906461	78.173681	d_nonborder_mitosmooth_threshold_compactness_60_percent_ser_spot_mean_per_well	nonborder_mitosmooth_threshold_compactness_60_percent_ser_spot_mean_per_well	d	MitoTracker	cell	compactness	asymptote	asymptote	maximum response	maximum response	maximum response cell MitoTracker compactness
767	1	pheno1	4	155.560461	5.917443712	45.894905	156.254732	d_nonborder_mitosmooth_threshold_compactness_60_percent_ser_valley_mean_per_well	nonborder_mitosmooth_threshold_compactness_60_percent_ser_valley_mean_per_well	d	MitoTracker	cell	compactness	asymptote	asymptote	maximum response	maximum response	maximum response cell MitoTracker compactness
768	1	pheno1	18	12.137382	9.536332183	6.481314	12.387209	d_nonborder_mitosmooth_width_mm_mean_per_well	nonborder_mitosmooth_width_mm_mean_per_well	d	MitoTracker	cell	size	asymptote	asymptote	NA	baseline	baseline cell MitoTracker size
769	1	pheno1	16	31.131443	7.022193145	28.975168	97.338959	d_nonborder_mitotracker_cell_area_mm2_mean_per_well	nonborder_mitotracker_cell_area_mm2_mean_per_well	d	MitoTracker	mitochondria	size	asymptote	asymptote	NA	baseline	baseline mitochondria MitoTracker size
770	1	pheno1	18	12.191943	9.577880137	10.363385	12.402095	d_nonborder_mitotracker_cell_length_mm_mean_per_well	nonborder_mitotracker_cell_length_mm_mean_per_well	d	MitoTracker	mitochondria	size	asymptote	asymptote	NA	baseline	baseline mitochondria MitoTracker size
771	1	pheno1	19	12.162839	5.375974696	11.066359	59.096801	d_nonborder_mitotracker_cell_ratio_width_to_length_mean_per_well	nonborder_mitotracker_cell_ratio_width_to_length_mean_per_well	d	MitoTracker	mitochondria	shape	asymptote	asymptote	maximum response	maximum response	maximum response mitochondria MitoTracker shape
772	1	pheno1	12	34.512002	5.638626901	32.444438	96.67853	d_nonborder_mitotracker_cell_roundness_mean_per_well	nonborder_mitotracker_cell_roundness_mean_per_well	d	MitoTracker	mitochondria	shape	asymptote	asymptote	maximum response	maximum response	maximum response mitochondria MitoTracker shape
773	1	pheno1	19	27.650082	7.052753193	25.609349	28.103942	d_nonborder_mitotracker_cell_width_mm_mean_per_well	nonborder_mitotracker_cell_width_mm_mean_per_well	d	MitoTracker	mitochondria	size	asymptote	asymptote	NA	baseline	baseline mitochondria MitoTracker size
774	1	pheno1	16	27.599995	6.495766851	23.806228	28.741687	d_nonborder_nucleus_alexa_488_ser_bright_3_px_mean_per_well	nonborder_nucleus_alexa_488_ser_bright_3_px_mean_per_well	d	H2AX	nucleus	texture	asymptote	asymptote	maximum response	maximum response	maximum response nucleus H2AX texture
775	1	pheno1	17	31.615045	7.033033789	29.057099	32.461779	d_nonborder_nucleus_alexa_488_ser_edge_3_px_mean_per_well	nonborder_nucleus_alexa_488_ser_edge_3_px_mean_per_well	d	H2AX	nucleus	texture	asymptote	asymptote	maximum response	maximum response	maximum response nucleus H2AX texture
776	1	pheno1	1	43.685711	6.314231565	43.489456	192.528101	d_nonborder_nucleus_alexa_488_ser_ridge_3_px_mean_per_well	nonborder_nucleus_alexa_488_ser_ridge_3_px_mean_per_well	d	H2AX	nucleus	texture	asymptote	asymptote	maximum response	maximum response	maximum response nucleus H2AX texture
777	1	pheno1	8	45.991701	6.611588112	45.222342	50.338743	d_nonborder_nucleus_alexa_488_ser_saddle_3_px_mean_per_well	nonborder_nucleus_alexa_488_ser_saddle_3_px_mean_per_well	d	H2AX	nucleus	texture	asymptote	asymptote	maximum response	maximum response	maximum response nucleus H2AX texture
778	1	pheno1	1	43.686349	7.486144559	43.489456	171.431737	d_nonborder_nucleus_alexa_488_ser_spot_3_px_mean_per_well	nonborder_nucleus_alexa_488_ser_spot_3_px_mean_per_well	d	H2AX	nucleus	texture	asymptote	asymptote	maximum response	maximum response	maximum response nucleus H2AX texture
779	1	pheno1	12	5.180911	7.714528987	4.026321	5.307581	d_nonborder_nucleus_area_mm2_mean_per_well	nonborder_nucleus_area_mm2_mean_per_well	d	Hoechst	nucleus	size	asymptote	asymptote	NA	baseline	baseline nucleus Hoechst size
780	1	pheno1	16	45.968447	6.007010653	44.750096	48.28306	d_nonborder_nucleus_axial_length_ratio_2_mean_per_well	nonborder_nucleus_axial_length_ratio_2_mean_per_well	d	Hoechst	nucleus	distribution	asymptote	asymptote	maximum response	maximum response	maximum response nucleus Hoechst distribution
781	1	pheno1	16	45.968447	6.665586428	45.657531	48.596708	d_nonborder_nucleus_axial_length_ratio_mean_per_well	nonborder_nucleus_axial_length_ratio_mean_per_well	d	Hoechst	nucleus	distribution	asymptote	asymptote	maximum response	maximum response	maximum response nucleus Hoechst distribution
782	1	pheno1	9	26.833061	5.686649549	26.421793	115.525726	d_nonborder_nucleus_axial_length_ratio_ser_bright_2_mean_per_well	nonborder_nucleus_axial_length_ratio_ser_bright_2_mean_per_well	d	Hoechst	nucleus	distribution	asymptote	asymptote	maximum response	maximum response	maximum response nucleus Hoechst distribution
783	1	pheno1	18	78.149913	6.18028307	77.251355	81.208621	d_nonborder_nucleus_axial_length_ratio_ser_bright_mean_per_well	nonborder_nucleus_axial_length_ratio_ser_bright_mean_per_well	d	Hoechst	nucleus	distribution	asymptote	asymptote	maximum response	maximum response	maximum response nucleus Hoechst distribution
784	1	pheno1	8	47.318307	5.296431158	36.36282	75.828628	d_nonborder_nucleus_axial_length_ratio_ser_dark_2_mean_per_well	nonborder_nucleus_axial_length_ratio_ser_dark_2_mean_per_well	d	Hoechst	nucleus	distribution	asymptote	asymptote	maximum response	maximum response	maximum response nucleus Hoechst distribution
785	1	pheno1	4	125.912518	6.352013236	125.611825	126.287301	d_nonborder_nucleus_axial_length_ratio_ser_dark_mean_per_well	nonborder_nucleus_axial_length_ratio_ser_dark_mean_per_well	d	Hoechst	nucleus	distribution	asymptote	asymptote	maximum response	maximum response	maximum response nucleus Hoechst distribution
786	1	pheno1	7	87.427423	6.043861545	86.741259	89.244003	d_nonborder_nucleus_axial_length_ratio_ser_edge_2_mean_per_well	nonborder_nucleus_axial_length_ratio_ser_edge_2_mean_per_well	d	Hoechst	nucleus	distribution	asymptote	asymptote	maximum response	maximum response	maximum response nucleus Hoechst distribution
787	1	pheno1	16	46.033144	7.373179329	44.758062	48.596708	d_nonborder_nucleus_axial_length_ratio_ser_edge_mean_per_well	nonborder_nucleus_axial_length_ratio_ser_edge_mean_per_well	d	Hoechst	nucleus	distribution	asymptote	asymptote	maximum response	maximum response	maximum response nucleus Hoechst distribution
788	1	pheno1	16	39.030722	6.794848792	36.497892	39.274656	d_nonborder_nucleus_axial_length_ratio_ser_hole_2_mean_per_well	nonborder_nucleus_axial_length_ratio_ser_hole_2_mean_per_well	d	Hoechst	nucleus	distribution	asymptote	asymptote	NA	baseline	baseline nucleus Hoechst distribution
789	1	pheno1	10	41.362987	7.605283589	40.334329	41.618147	d_nonborder_nucleus_axial_length_ratio_ser_hole_mean_per_well	nonborder_nucleus_axial_length_ratio_ser_hole_mean_per_well	d	Hoechst	nucleus	distribution	asymptote	asymptote	maximum response	maximum response	maximum response nucleus Hoechst distribution
790	1	pheno1	5	3.60948	6.701952469	3.365517	7.3297	d_nonborder_nucleus_axial_length_ratio_ser_ridge_2_mean_per_well	nonborder_nucleus_axial_length_ratio_ser_ridge_2_mean_per_well	d	Hoechst	nucleus	distribution	asymptote	asymptote	maximum response	maximum response	maximum response nucleus Hoechst distribution
791	1	pheno1	16	91.136456	5.943730156	45.693797	91.639638	d_nonborder_nucleus_axial_length_ratio_ser_ridge_mean_per_well	nonborder_nucleus_axial_length_ratio_ser_ridge_mean_per_well	d	Hoechst	nucleus	distribution	asymptote	asymptote	maximum response	maximum response	maximum response nucleus Hoechst distribution
792	1	pheno1	15	94.250926	6.729639238	94.141453	94.326317	d_nonborder_nucleus_axial_length_ratio_ser_saddle_2_mean_per_well	nonborder_nucleus_axial_length_ratio_ser_saddle_2_mean_per_well	d	Hoechst	nucleus	distribution	asymptote	asymptote	maximum response	maximum response	maximum response nucleus Hoechst distribution
793	1	pheno1	11	84.089641	6.637120193	82.734614	84.832017	d_nonborder_nucleus_axial_length_ratio_ser_saddle_mean_per_well	nonborder_nucleus_axial_length_ratio_ser_saddle_mean_per_well	d	Hoechst	nucleus	distribution	asymptote	asymptote	maximum response	maximum response	maximum response nucleus Hoechst distribution
794	1	pheno1	17	9.528456	5.073974308	5.613951	88.889624	d_nonborder_nucleus_axial_length_ratio_ser_spot_2_mean_per_well	nonborder_nucleus_axial_length_ratio_ser_spot_2_mean_per_well	d	Hoechst	nucleus	distribution	asymptote	asymptote	maximum response	maximum response	maximum response nucleus Hoechst distribution
795	1	pheno1	15	27.437203	6.024743668	27.40518	36.340422	d_nonborder_nucleus_axial_length_ratio_ser_spot_mean_per_well	nonborder_nucleus_axial_length_ratio_ser_spot_mean_per_well	d	Hoechst	nucleus	distribution	asymptote	asymptote	maximum response	maximum response	maximum response nucleus Hoechst distribution
796	1	pheno1	8	48.899427	5.290023499	36.022343	75.828628	d_nonborder_nucleus_axial_length_ratio_ser_valley_2_mean_per_well	nonborder_nucleus_axial_length_ratio_ser_valley_2_mean_per_well	d	Hoechst	nucleus	distribution	asymptote	asymptote	maximum response	maximum response	maximum response nucleus Hoechst distribution
797	1	pheno1	16	51.501959	6.568903339	51.052708	51.618176	d_nonborder_nucleus_axial_length_ratio_ser_valley_mean_per_well	nonborder_nucleus_axial_length_ratio_ser_valley_mean_per_well	d	Hoechst	nucleus	distribution	asymptote	asymptote	maximum response	maximum response	maximum response nucleus Hoechst distribution
798	1	pheno1	18	11.986717	6.857333962	5.402671	12.387209	d_nonborder_nucleus_axial_small_length_2_mean_per_well	nonborder_nucleus_axial_small_length_2_mean_per_well	d	Hoechst	nucleus	distribution	asymptote	asymptote	NA	baseline	baseline nucleus Hoechst distribution
799	1	pheno1	18	11.986717	6.921906689	5.402671	12.387209	d_nonborder_nucleus_axial_small_length_mean_per_well	nonborder_nucleus_axial_small_length_mean_per_well	d	H2AX	nucleus	size	asymptote	asymptote	NA	baseline	baseline nucleus H2AX size
800	1	pheno1	7	34.757896	6.08933529	34.542694	89.589284	d_nonborder_nucleus_axial_small_length_ser_bright_2_mean_per_well	nonborder_nucleus_axial_small_length_ser_bright_2_mean_per_well	d	Hoechst	nucleus	distribution	asymptote	asymptote	NA	baseline	baseline nucleus Hoechst distribution
801	1	pheno1	18	11.986717	6.404034333	5.264642	34.005468	d_nonborder_nucleus_axial_small_length_ser_bright_mean_per_well	nonborder_nucleus_axial_small_length_ser_bright_mean_per_well	d	H2AX	nucleus	distribution	asymptote	asymptote	NA	baseline	baseline nucleus H2AX distribution
802	1	pheno1	18	25.02108	5.652831431	5.402671	46.245418	d_nonborder_nucleus_axial_small_length_ser_dark_2_mean_per_well	nonborder_nucleus_axial_small_length_ser_dark_2_mean_per_well	d	Hoechst	nucleus	distribution	asymptote	asymptote	NA	baseline	baseline nucleus Hoechst distribution
803	1	pheno1	18	11.986717	7.705925061	5.892182	12.387209	d_nonborder_nucleus_axial_small_length_ser_dark_mean_per_well	nonborder_nucleus_axial_small_length_ser_dark_mean_per_well	d	H2AX	nucleus	distribution	asymptote	asymptote	NA	baseline	baseline nucleus H2AX distribution
804	1	pheno1	8	78.863162	6.293241032	78.208887	79.256876	d_nonborder_nucleus_axial_small_length_ser_edge_2_mean_per_well	nonborder_nucleus_axial_small_length_ser_edge_2_mean_per_well	d	Hoechst	nucleus	distribution	asymptote	asymptote	NA	baseline	baseline nucleus Hoechst distribution
805	1	pheno1	18	11.986717	6.500829388	5.791015	34.555161	d_nonborder_nucleus_axial_small_length_ser_edge_mean_per_well	nonborder_nucleus_axial_small_length_ser_edge_mean_per_well	d	H2AX	nucleus	distribution	asymptote	asymptote	NA	baseline	baseline nucleus H2AX distribution
806	1	pheno1	7	87.539922	7.396123243	84.269141	89.55929	d_nonborder_nucleus_axial_small_length_ser_hole_2_mean_per_well	nonborder_nucleus_axial_small_length_ser_hole_2_mean_per_well	d	Hoechst	nucleus	distribution	asymptote	asymptote	NA	baseline	baseline nucleus Hoechst distribution
807	1	pheno1	18	11.986717	7.49290183	5.455641	12.387209	d_nonborder_nucleus_axial_small_length_ser_hole_mean_per_well	nonborder_nucleus_axial_small_length_ser_hole_mean_per_well	d	H2AX	nucleus	distribution	asymptote	asymptote	NA	baseline	baseline nucleus H2AX distribution
808	1	pheno1	7	34.757896	6.426995092	34.542694	89.55929	d_nonborder_nucleus_axial_small_length_ser_ridge_2_mean_per_well	nonborder_nucleus_axial_small_length_ser_ridge_2_mean_per_well	d	Hoechst	nucleus	distribution	asymptote	asymptote	NA	baseline	baseline nucleus Hoechst distribution
809	1	pheno1	18	11.986717	6.587516004	5.402671	13.126926	d_nonborder_nucleus_axial_small_length_ser_ridge_mean_per_well	nonborder_nucleus_axial_small_length_ser_ridge_mean_per_well	d	H2AX	nucleus	distribution	asymptote	asymptote	NA	baseline	baseline nucleus H2AX distribution
810	1	pheno1	18	46.340826	6.131578487	5.70076	47.421889	d_nonborder_nucleus_axial_small_length_ser_saddle_2_mean_per_well	nonborder_nucleus_axial_small_length_ser_saddle_2_mean_per_well	d	Hoechst	nucleus	distribution	asymptote	asymptote	NA	baseline	baseline nucleus Hoechst distribution
811	1	pheno1	18	11.986717	7.763925225	5.587256	12.387209	d_nonborder_nucleus_axial_small_length_ser_saddle_mean_per_well	nonborder_nucleus_axial_small_length_ser_saddle_mean_per_well	d	H2AX	nucleus	distribution	asymptote	asymptote	NA	baseline	baseline nucleus H2AX distribution
812	1	pheno1	7	34.757896	6.239915656	34.542694	89.525232	d_nonborder_nucleus_axial_small_length_ser_spot_2_mean_per_well	nonborder_nucleus_axial_small_length_ser_spot_2_mean_per_well	d	Hoechst	nucleus	distribution	asymptote	asymptote	NA	baseline	baseline nucleus Hoechst distribution
813	1	pheno1	18	11.986717	6.46208115	5.264642	33.836936	d_nonborder_nucleus_axial_small_length_ser_spot_mean_per_well	nonborder_nucleus_axial_small_length_ser_spot_mean_per_well	d	H2AX	nucleus	distribution	asymptote	asymptote	NA	baseline	baseline nucleus H2AX distribution
814	1	pheno1	8	78.624431	5.948351225	24.20774	119.496915	d_nonborder_nucleus_axial_small_length_ser_valley_2_mean_per_well	nonborder_nucleus_axial_small_length_ser_valley_2_mean_per_well	d	Hoechst	nucleus	distribution	asymptote	asymptote	NA	baseline	baseline nucleus Hoechst distribution
815	1	pheno1	18	11.986717	7.843405262	5.791015	12.387209	d_nonborder_nucleus_axial_small_length_ser_valley_mean_per_well	nonborder_nucleus_axial_small_length_ser_valley_mean_per_well	d	H2AX	nucleus	distribution	asymptote	asymptote	NA	baseline	baseline nucleus H2AX distribution
816	1	pheno1	14	19.401644	9.639180698	18.31676	19.594813	d_nonborder_nucleus_hoechst_33342_ser_bright_1_px_mean_per_well	nonborder_nucleus_hoechst_33342_ser_bright_1_px_mean_per_well	d	Hoechst	nucleus	texture	asymptote	asymptote	NA	baseline	baseline nucleus Hoechst texture
817	1	pheno1	1	23.635672	6.493883147	23.007168	192.409678	d_nonborder_nucleus_hoechst_33342_ser_dark_1_px_mean_per_well	nonborder_nucleus_hoechst_33342_ser_dark_1_px_mean_per_well	d	Hoechst	nucleus	texture	asymptote	asymptote	NA	baseline	baseline nucleus Hoechst texture
818	1	pheno1	12	28.41831	6.926211603	28.393164	30.030128	d_nonborder_nucleus_hoechst_33342_ser_edge_1_px_mean_per_well	nonborder_nucleus_hoechst_33342_ser_edge_1_px_mean_per_well	d	Hoechst	nucleus	texture	asymptote	asymptote	maximum response	maximum response	maximum response nucleus Hoechst texture
819	1	pheno1	7	4.350873	6.274553978	3.221337	127.077781	d_nonborder_nucleus_hoechst_33342_ser_ridge_1_px_mean_per_well	nonborder_nucleus_hoechst_33342_ser_ridge_1_px_mean_per_well	d	Hoechst	nucleus	texture	asymptote	asymptote	NA	baseline	baseline nucleus Hoechst texture
820	1	pheno1	13	103.097056	5.565379144	21.138977	103.191303	d_nonborder_nucleus_hoechst_33342_ser_saddle_1_px_mean_per_well	nonborder_nucleus_hoechst_33342_ser_saddle_1_px_mean_per_well	d	Hoechst	nucleus	texture	asymptote	asymptote	NA	baseline	baseline nucleus Hoechst texture
821	1	pheno1	14	19.281191	7.628143409	17.492266	19.594813	d_nonborder_nucleus_hoechst_33342_ser_spot_1_px_mean_per_well	nonborder_nucleus_hoechst_33342_ser_spot_1_px_mean_per_well	d	Hoechst	nucleus	texture	asymptote	asymptote	NA	baseline	baseline nucleus Hoechst texture
822	1	pheno1	16	50.554095	5.948679327	48.558017	97.544767	d_nonborder_nucleus_hoechst_33342_ser_valley_1_px_mean_per_well	nonborder_nucleus_hoechst_33342_ser_valley_1_px_mean_per_well	d	Hoechst	nucleus	texture	asymptote	asymptote	NA	baseline	baseline nucleus Hoechst texture
823	1	pheno1	18	11.950698	7.541085884	5.402671	12.387209	d_nonborder_nucleus_length_mm_mean_per_well	nonborder_nucleus_length_mm_mean_per_well	d	Hoechst	nucleus	size	asymptote	asymptote	NA	baseline	baseline nucleus Hoechst size
824	1	pheno1	8	45.907709	6.055123344	37.096282	46.142601	d_nonborder_nucleus_profile_1_2_2_mean_per_well	nonborder_nucleus_profile_1_2_2_mean_per_well	d	Hoechst	nucleus	distribution	asymptote	asymptote	maximum response	maximum response	maximum response nucleus Hoechst distribution
825	1	pheno1	4	36.858461	6.645431361	35.399328	38.080187	d_nonborder_nucleus_profile_1_2_mean_per_well	nonborder_nucleus_profile_1_2_mean_per_well	d	Hoechst	nucleus	distribution	asymptote	asymptote	NA	baseline	baseline nucleus Hoechst distribution
826	1	pheno1	14	19.401644	8.240919783	18.528833	19.594813	d_nonborder_nucleus_profile_1_2_ser_bright_2_mean_per_well	nonborder_nucleus_profile_1_2_ser_bright_2_mean_per_well	d	Hoechst	nucleus	distribution	asymptote	asymptote	NA	baseline	baseline nucleus Hoechst distribution
827	1	pheno1	3	53.290619	6.63652372	53.038567	54.81575	d_nonborder_nucleus_profile_1_2_ser_bright_mean_per_well	nonborder_nucleus_profile_1_2_ser_bright_mean_per_well	d	H2AX	nucleus	distribution	asymptote	asymptote	NA	baseline	baseline nucleus H2AX distribution
828	1	pheno1	7	3.419086	6.531697778	3.221337	4.01148	d_nonborder_nucleus_profile_1_2_ser_dark_2_mean_per_well	nonborder_nucleus_profile_1_2_ser_dark_2_mean_per_well	d	Hoechst	nucleus	distribution	asymptote	asymptote	maximum response	maximum response	maximum response nucleus Hoechst distribution
829	1	pheno1	17	31.945096	8.044798327	30.952949	32.461779	d_nonborder_nucleus_profile_1_2_ser_dark_mean_per_well	nonborder_nucleus_profile_1_2_ser_dark_mean_per_well	d	H2AX	nucleus	distribution	asymptote	asymptote	maximum response	maximum response	maximum response nucleus H2AX distribution
830	1	pheno1	14	18.836231	7.269911034	10.854403	19.594813	d_nonborder_nucleus_profile_1_2_ser_edge_2_mean_per_well	nonborder_nucleus_profile_1_2_ser_edge_2_mean_per_well	d	Hoechst	nucleus	distribution	asymptote	asymptote	maximum response	maximum response	maximum response nucleus Hoechst distribution
831	1	pheno1	2	28.375815	7.721358346	28.32293	29.158592	d_nonborder_nucleus_profile_1_2_ser_edge_mean_per_well	nonborder_nucleus_profile_1_2_ser_edge_mean_per_well	d	H2AX	nucleus	distribution	asymptote	asymptote	maximum response	maximum response	maximum response nucleus H2AX distribution
832	1	pheno1	6	98.279927	7.061120397	98.049786	98.478318	d_nonborder_nucleus_profile_1_2_ser_hole_mean_per_well	nonborder_nucleus_profile_1_2_ser_hole_mean_per_well	d	H2AX	nucleus	distribution	asymptote	asymptote	NA	baseline	baseline nucleus H2AX distribution
833	1	pheno1	18	33.650877	6.521236107	31.749092	34.005468	d_nonborder_nucleus_profile_1_2_ser_ridge_2_mean_per_well	nonborder_nucleus_profile_1_2_ser_ridge_2_mean_per_well	d	Hoechst	nucleus	distribution	asymptote	asymptote	NA	baseline	baseline nucleus Hoechst distribution
834	1	pheno1	3	53.265071	6.232647396	40.326218	54.81575	d_nonborder_nucleus_profile_1_2_ser_ridge_mean_per_well	nonborder_nucleus_profile_1_2_ser_ridge_mean_per_well	d	H2AX	nucleus	distribution	asymptote	asymptote	NA	baseline	baseline nucleus H2AX distribution
835	1	pheno1	7	134.716767	6.755341539	134.689285	134.785005	d_nonborder_nucleus_profile_1_2_ser_saddle_2_mean_per_well	nonborder_nucleus_profile_1_2_ser_saddle_2_mean_per_well	d	Hoechst	nucleus	distribution	asymptote	asymptote	maximum response	maximum response	maximum response nucleus Hoechst distribution
836	1	pheno1	2	28.375815	7.705602828	28.295841	30.963508	d_nonborder_nucleus_profile_1_2_ser_saddle_mean_per_well	nonborder_nucleus_profile_1_2_ser_saddle_mean_per_well	d	H2AX	nucleus	distribution	asymptote	asymptote	maximum response	maximum response	maximum response nucleus H2AX distribution
837	1	pheno1	14	19.281191	8.069587981	17.538589	19.594813	d_nonborder_nucleus_profile_1_2_ser_spot_2_mean_per_well	nonborder_nucleus_profile_1_2_ser_spot_2_mean_per_well	d	Hoechst	nucleus	distribution	asymptote	asymptote	NA	baseline	baseline nucleus Hoechst distribution
838	1	pheno1	3	53.290619	6.867293116	53.038567	54.81575	d_nonborder_nucleus_profile_1_2_ser_spot_mean_per_well	nonborder_nucleus_profile_1_2_ser_spot_mean_per_well	d	H2AX	nucleus	distribution	asymptote	asymptote	NA	baseline	baseline nucleus H2AX distribution
839	1	pheno1	14	11.756067	6.258991367	10.547359	86.016261	d_nonborder_nucleus_profile_1_2_ser_valley_2_mean_per_well	nonborder_nucleus_profile_1_2_ser_valley_2_mean_per_well	d	Hoechst	nucleus	distribution	asymptote	asymptote	maximum response	maximum response	maximum response nucleus Hoechst distribution
840	1	pheno1	17	31.945096	6.585584857	30.773584	32.47801	d_nonborder_nucleus_profile_1_2_ser_valley_mean_per_well	nonborder_nucleus_profile_1_2_ser_valley_mean_per_well	d	H2AX	nucleus	distribution	asymptote	asymptote	maximum response	maximum response	maximum response nucleus H2AX distribution
841	1	pheno1	2	50.316681	7.134965667	49.527869	50.653018	d_nonborder_nucleus_profile_2_2_2_mean_per_well	nonborder_nucleus_profile_2_2_2_mean_per_well	d	Hoechst	nucleus	distribution	asymptote	asymptote	maximum response	maximum response	maximum response nucleus Hoechst distribution
842	1	pheno1	2	28.375815	8.237175639	27.232305	29.772055	d_nonborder_nucleus_profile_2_2_mean_per_well	nonborder_nucleus_profile_2_2_mean_per_well	d	Hoechst	nucleus	distribution	asymptote	asymptote	maximum response	maximum response	maximum response nucleus Hoechst distribution
843	1	pheno1	14	77.551686	7.005669309	75.96413	77.755665	d_nonborder_nucleus_profile_2_2_ser_bright_2_mean_per_well	nonborder_nucleus_profile_2_2_ser_bright_2_mean_per_well	d	Hoechst	nucleus	distribution	asymptote	asymptote	maximum response	maximum response	maximum response nucleus Hoechst distribution
844	1	pheno1	5	73.357143	7.063718209	72.246631	108.468209	d_nonborder_nucleus_profile_2_2_ser_bright_mean_per_well	nonborder_nucleus_profile_2_2_ser_bright_mean_per_well	d	H2AX	nucleus	distribution	asymptote	asymptote	maximum response	maximum response	maximum response nucleus H2AX distribution
845	1	pheno1	3	25.206281	9.220241607	21.315548	26.550415	d_nonborder_nucleus_profile_2_2_ser_dark_2_mean_per_well	nonborder_nucleus_profile_2_2_ser_dark_2_mean_per_well	d	Hoechst	nucleus	distribution	asymptote	asymptote	NA	baseline	baseline nucleus Hoechst distribution
846	1	pheno1	12	44.613409	7.009640917	10.552383	45.127331	d_nonborder_nucleus_profile_2_2_ser_dark_mean_per_well	nonborder_nucleus_profile_2_2_ser_dark_mean_per_well	d	H2AX	nucleus	distribution	asymptote	asymptote	NA	baseline	baseline nucleus H2AX distribution
847	1	pheno1	18	31.885621	6.049484154	30.751693	33.09407	d_nonborder_nucleus_profile_2_2_ser_edge_2_mean_per_well	nonborder_nucleus_profile_2_2_ser_edge_2_mean_per_well	d	Hoechst	nucleus	distribution	asymptote	asymptote	NA	baseline	baseline nucleus Hoechst distribution
848	1	pheno1	11	20.864141	8.221188804	20.732494	20.974454	d_nonborder_nucleus_profile_2_2_ser_edge_mean_per_well	nonborder_nucleus_profile_2_2_ser_edge_mean_per_well	d	H2AX	nucleus	distribution	asymptote	asymptote	maximum response	maximum response	maximum response nucleus H2AX distribution
849	1	pheno1	12	109.108823	7.791771681	108.843967	109.410742	d_nonborder_nucleus_profile_2_2_ser_hole_mean_per_well	nonborder_nucleus_profile_2_2_ser_hole_mean_per_well	d	H2AX	nucleus	distribution	asymptote	asymptote	NA	baseline	baseline nucleus H2AX distribution
850	1	pheno1	11	59.177361	6.629038122	57.421797	60.67538	d_nonborder_nucleus_profile_2_2_ser_ridge_mean_per_well	nonborder_nucleus_profile_2_2_ser_ridge_mean_per_well	d	H2AX	nucleus	distribution	asymptote	asymptote	maximum response	maximum response	maximum response nucleus H2AX distribution
851	1	pheno1	3	25.206281	9.272494089	21.940263	25.208839	d_nonborder_nucleus_profile_2_2_ser_saddle_2_mean_per_well	nonborder_nucleus_profile_2_2_ser_saddle_2_mean_per_well	d	Hoechst	nucleus	distribution	asymptote	asymptote	NA	baseline	baseline nucleus Hoechst distribution
852	1	pheno1	X	131.924183	5.701885095	11.520284	134.593136	d_nonborder_nucleus_profile_2_2_ser_saddle_mean_per_well	nonborder_nucleus_profile_2_2_ser_saddle_mean_per_well	d	H2AX	nucleus	distribution	asymptote	asymptote	NA	baseline	baseline nucleus H2AX distribution
853	1	pheno1	17	69.312168	6.858024166	53.634833	69.733607	d_nonborder_nucleus_profile_2_2_ser_spot_2_mean_per_well	nonborder_nucleus_profile_2_2_ser_spot_2_mean_per_well	d	Hoechst	nucleus	distribution	asymptote	asymptote	maximum response	maximum response	maximum response nucleus Hoechst distribution
854	1	pheno1	1	47.286127	7.862250572	43.685248	47.780735	d_nonborder_nucleus_profile_2_2_ser_spot_mean_per_well	nonborder_nucleus_profile_2_2_ser_spot_mean_per_well	d	H2AX	nucleus	distribution	asymptote	asymptote	maximum response	maximum response	maximum response nucleus H2AX distribution
855	1	pheno1	3	25.206281	9.411838713	21.315548	26.550415	d_nonborder_nucleus_profile_2_2_ser_valley_2_mean_per_well	nonborder_nucleus_profile_2_2_ser_valley_2_mean_per_well	d	Hoechst	nucleus	distribution	asymptote	asymptote	NA	baseline	baseline nucleus Hoechst distribution
856	1	pheno1	5	93.741238	6.434340627	91.958082	96.56096	d_nonborder_nucleus_profile_2_2_ser_valley_mean_per_well	nonborder_nucleus_profile_2_2_ser_valley_mean_per_well	d	H2AX	nucleus	distribution	asymptote	asymptote	NA	baseline	baseline nucleus H2AX distribution
857	1	pheno1	12	5.180911	7.421535364	4.026321	5.324666	d_nonborder_nucleus_radial_mean_2_mean_per_well	nonborder_nucleus_radial_mean_2_mean_per_well	d	Hoechst	nucleus	distribution	asymptote	asymptote	NA	baseline	baseline nucleus Hoechst distribution
858	1	pheno1	18	6.495929	7.222403694	5.022374	33.672461	d_nonborder_nucleus_radial_mean_mean_per_well	nonborder_nucleus_radial_mean_mean_per_well	d	Hoechst	nucleus	distribution	asymptote	asymptote	NA	baseline	baseline nucleus Hoechst distribution
859	1	pheno1	2	78.358533	6.273248049	77.86248	172.776598	d_nonborder_nucleus_radial_mean_ratio_ser_bright_2_mean_per_well	nonborder_nucleus_radial_mean_ratio_ser_bright_2_mean_per_well	d	Hoechst	nucleus	distribution	asymptote	asymptote	NA	baseline	baseline nucleus Hoechst distribution
860	1	pheno1	15	19.03391	7.143035298	18.862132	37.913055	d_nonborder_nucleus_radial_mean_ratio_ser_bright_mean_per_well	nonborder_nucleus_radial_mean_ratio_ser_bright_mean_per_well	d	H2AX	nucleus	distribution	asymptote	asymptote	NA	baseline	baseline nucleus H2AX distribution
861	1	pheno1	17	62.841133	7.112683115	54.786857	64.580892	d_nonborder_nucleus_radial_mean_ratio_ser_dark_2_mean_per_well	nonborder_nucleus_radial_mean_ratio_ser_dark_2_mean_per_well	d	Hoechst	nucleus	distribution	asymptote	asymptote	maximum response	maximum response	maximum response nucleus Hoechst distribution
862	1	pheno1	2	28.715484	6.917908156	28.334769	30.897328	d_nonborder_nucleus_radial_mean_ratio_ser_dark_mean_per_well	nonborder_nucleus_radial_mean_ratio_ser_dark_mean_per_well	d	H2AX	nucleus	distribution	asymptote	asymptote	maximum response	maximum response	maximum response nucleus H2AX distribution
863	1	pheno1	7	3.26663	6.449155963	3.062101	103.662313	d_nonborder_nucleus_radial_mean_ratio_ser_edge_2_mean_per_well	nonborder_nucleus_radial_mean_ratio_ser_edge_2_mean_per_well	d	Hoechst	nucleus	distribution	asymptote	asymptote	maximum response	maximum response	maximum response nucleus Hoechst distribution
864	1	pheno1	17	32.410256	7.440589783	29.25071	32.843464	d_nonborder_nucleus_radial_mean_ratio_ser_edge_mean_per_well	nonborder_nucleus_radial_mean_ratio_ser_edge_mean_per_well	d	H2AX	nucleus	distribution	asymptote	asymptote	maximum response	maximum response	maximum response nucleus H2AX distribution
865	1	pheno1	14	59.156044	6.037605875	58.78285	104.116743	d_nonborder_nucleus_radial_mean_ratio_ser_hole_2_mean_per_well	nonborder_nucleus_radial_mean_ratio_ser_hole_2_mean_per_well	d	Hoechst	nucleus	distribution	asymptote	asymptote	maximum response	maximum response	maximum response nucleus Hoechst distribution
866	1	pheno1	16	23.728092	7.044876776	23.35124	30.91075	d_nonborder_nucleus_radial_mean_ratio_ser_hole_mean_per_well	nonborder_nucleus_radial_mean_ratio_ser_hole_mean_per_well	d	H2AX	nucleus	distribution	asymptote	asymptote	maximum response	maximum response	maximum response nucleus H2AX distribution
867	1	pheno1	12	106.004257	6.521880515	105.667975	106.530917	d_nonborder_nucleus_radial_mean_ratio_ser_ridge_2_mean_per_well	nonborder_nucleus_radial_mean_ratio_ser_ridge_2_mean_per_well	d	Hoechst	nucleus	distribution	asymptote	asymptote	NA	baseline	baseline nucleus Hoechst distribution
868	1	pheno1	15	19.03391	6.48438237	18.736344	86.504759	d_nonborder_nucleus_radial_mean_ratio_ser_ridge_mean_per_well	nonborder_nucleus_radial_mean_ratio_ser_ridge_mean_per_well	d	H2AX	nucleus	distribution	asymptote	asymptote	NA	baseline	baseline nucleus H2AX distribution
869	1	pheno1	14	18.836231	6.337236782	10.760938	19.594813	d_nonborder_nucleus_radial_mean_ratio_ser_saddle_2_mean_per_well	nonborder_nucleus_radial_mean_ratio_ser_saddle_2_mean_per_well	d	Hoechst	nucleus	distribution	asymptote	asymptote	maximum response	maximum response	maximum response nucleus Hoechst distribution
870	1	pheno1	2	30.571024	7.866708499	27.232305	31.002207	d_nonborder_nucleus_radial_mean_ratio_ser_saddle_mean_per_well	nonborder_nucleus_radial_mean_ratio_ser_saddle_mean_per_well	d	H2AX	nucleus	distribution	asymptote	asymptote	maximum response	maximum response	maximum response nucleus H2AX distribution
871	1	pheno1	X	155.585764	7.033073384	153.94803	157.272067	d_nonborder_nucleus_radial_mean_ratio_ser_spot_2_mean_per_well	nonborder_nucleus_radial_mean_ratio_ser_spot_2_mean_per_well	d	Hoechst	nucleus	distribution	asymptote	asymptote	NA	baseline	baseline nucleus Hoechst distribution
872	1	pheno1	7	11.735482	7.131915835	10.616478	13.014253	d_nonborder_nucleus_radial_mean_ratio_ser_spot_mean_per_well	nonborder_nucleus_radial_mean_ratio_ser_spot_mean_per_well	d	H2AX	nucleus	distribution	asymptote	asymptote	NA	baseline	baseline nucleus H2AX distribution
873	1	pheno1	17	62.43478	6.760440037	54.757282	64.580892	d_nonborder_nucleus_radial_mean_ratio_ser_valley_2_mean_per_well	nonborder_nucleus_radial_mean_ratio_ser_valley_2_mean_per_well	d	Hoechst	nucleus	distribution	asymptote	asymptote	maximum response	maximum response	maximum response nucleus Hoechst distribution
874	1	pheno1	16	27.599995	8.039806962	27.346708	28.451499	d_nonborder_nucleus_radial_mean_ratio_ser_valley_mean_per_well	nonborder_nucleus_radial_mean_ratio_ser_valley_mean_per_well	d	H2AX	nucleus	distribution	asymptote	asymptote	maximum response	maximum response	maximum response nucleus H2AX distribution
875	1	pheno1	12	5.180911	7.41996341	4.026321	5.324666	d_nonborder_nucleus_radial_mean_ser_bright_2_mean_per_well	nonborder_nucleus_radial_mean_ser_bright_2_mean_per_well	d	Hoechst	nucleus	distribution	asymptote	asymptote	NA	baseline	baseline nucleus Hoechst distribution
876	1	pheno1	12	5.180911	7.344466426	4.026321	5.324666	d_nonborder_nucleus_radial_mean_ser_bright_mean_per_well	nonborder_nucleus_radial_mean_ser_bright_mean_per_well	d	H2AX	nucleus	distribution	asymptote	asymptote	NA	baseline	baseline nucleus H2AX distribution
877	1	pheno1	2	81.022002	6.283542836	79.412389	81.096539	d_nonborder_nucleus_radial_mean_ser_dark_2_mean_per_well	nonborder_nucleus_radial_mean_ser_dark_2_mean_per_well	d	Hoechst	nucleus	distribution	asymptote	asymptote	NA	baseline	baseline nucleus Hoechst distribution
878	1	pheno1	18	11.986717	7.528011825	5.70076	12.387209	d_nonborder_nucleus_radial_mean_ser_dark_mean_per_well	nonborder_nucleus_radial_mean_ser_dark_mean_per_well	d	H2AX	nucleus	distribution	asymptote	asymptote	NA	baseline	baseline nucleus H2AX distribution
879	1	pheno1	18	7.035579	6.578535046	4.82363	33.859613	d_nonborder_nucleus_radial_mean_ser_edge_2_mean_per_well	nonborder_nucleus_radial_mean_ser_edge_2_mean_per_well	d	Hoechst	nucleus	distribution	asymptote	asymptote	NA	baseline	baseline nucleus Hoechst distribution
880	1	pheno1	18	11.986717	6.830035003	5.488269	34.10152	d_nonborder_nucleus_radial_mean_ser_edge_mean_per_well	nonborder_nucleus_radial_mean_ser_edge_mean_per_well	d	H2AX	nucleus	distribution	asymptote	asymptote	NA	baseline	baseline nucleus H2AX distribution
881	1	pheno1	12	5.173084	6.772062762	3.0327	5.281294	d_nonborder_nucleus_radial_mean_ser_hole_2_mean_per_well	nonborder_nucleus_radial_mean_ser_hole_2_mean_per_well	d	Hoechst	nucleus	distribution	asymptote	asymptote	NA	baseline	baseline nucleus Hoechst distribution
882	1	pheno1	18	11.986717	7.786933088	5.402671	12.402095	d_nonborder_nucleus_radial_mean_ser_hole_mean_per_well	nonborder_nucleus_radial_mean_ser_hole_mean_per_well	d	H2AX	nucleus	distribution	asymptote	asymptote	NA	baseline	baseline nucleus H2AX distribution
883	1	pheno1	12	5.180911	7.754290196	4.026321	5.324666	d_nonborder_nucleus_radial_mean_ser_ridge_2_mean_per_well	nonborder_nucleus_radial_mean_ser_ridge_2_mean_per_well	d	Hoechst	nucleus	distribution	asymptote	asymptote	NA	baseline	baseline nucleus Hoechst distribution
884	1	pheno1	12	5.180911	7.254578979	4.026321	5.324666	d_nonborder_nucleus_radial_mean_ser_ridge_mean_per_well	nonborder_nucleus_radial_mean_ser_ridge_mean_per_well	d	H2AX	nucleus	distribution	asymptote	asymptote	NA	baseline	baseline nucleus H2AX distribution
885	1	pheno1	2	81.022002	6.528580759	79.547166	81.096539	d_nonborder_nucleus_radial_mean_ser_saddle_2_mean_per_well	nonborder_nucleus_radial_mean_ser_saddle_2_mean_per_well	d	Hoechst	nucleus	distribution	asymptote	asymptote	NA	baseline	baseline nucleus Hoechst distribution
886	1	pheno1	12	5.180911	7.44548404	4.026321	5.324666	d_nonborder_nucleus_radial_mean_ser_saddle_mean_per_well	nonborder_nucleus_radial_mean_ser_saddle_mean_per_well	d	H2AX	nucleus	distribution	asymptote	asymptote	NA	baseline	baseline nucleus H2AX distribution
887	1	pheno1	18	6.452906	7.203810227	4.82363	12.384451	d_nonborder_nucleus_radial_mean_ser_spot_2_mean_per_well	nonborder_nucleus_radial_mean_ser_spot_2_mean_per_well	d	Hoechst	nucleus	distribution	asymptote	asymptote	NA	baseline	baseline nucleus Hoechst distribution
888	1	pheno1	12	5.180911	7.210116347	4.026321	109.410742	d_nonborder_nucleus_radial_mean_ser_spot_mean_per_well	nonborder_nucleus_radial_mean_ser_spot_mean_per_well	d	H2AX	nucleus	distribution	asymptote	asymptote	NA	baseline	baseline nucleus H2AX distribution
889	1	pheno1	2	81.022002	6.494212404	79.598741	81.096539	d_nonborder_nucleus_radial_mean_ser_valley_2_mean_per_well	nonborder_nucleus_radial_mean_ser_valley_2_mean_per_well	d	Hoechst	nucleus	distribution	asymptote	asymptote	NA	baseline	baseline nucleus Hoechst distribution
890	1	pheno1	18	11.986717	7.574287107	5.791015	12.387209	d_nonborder_nucleus_radial_mean_ser_valley_mean_per_well	nonborder_nucleus_radial_mean_ser_valley_mean_per_well	d	H2AX	nucleus	distribution	asymptote	asymptote	NA	baseline	baseline nucleus H2AX distribution
891	1	pheno1	2	29.621942	6.475078446	29.215733	80.641256	d_nonborder_nucleus_radial_relative_deviation_2_mean_per_well	nonborder_nucleus_radial_relative_deviation_2_mean_per_well	d	Hoechst	nucleus	distribution	asymptote	asymptote	maximum response	maximum response	maximum response nucleus Hoechst distribution
892	1	pheno1	13	105.463342	6.882948593	40.113795	106.162322	d_nonborder_nucleus_radial_relative_deviation_mean_per_well	nonborder_nucleus_radial_relative_deviation_mean_per_well	d	H2AX	nucleus	distribution	asymptote	asymptote	maximum response	maximum response	maximum response nucleus H2AX distribution
893	1	pheno1	5	90.721805	6.165721639	76.659927	91.711252	d_nonborder_nucleus_radial_relative_deviation_ser_bright_2_mean_per_well	nonborder_nucleus_radial_relative_deviation_ser_bright_2_mean_per_well	d	Hoechst	nucleus	distribution	asymptote	asymptote	maximum response	maximum response	maximum response nucleus Hoechst distribution
894	1	pheno1	12	118.199315	7.462969872	117.690861	119.184216	d_nonborder_nucleus_radial_relative_deviation_ser_bright_mean_per_well	nonborder_nucleus_radial_relative_deviation_ser_bright_mean_per_well	d	H2AX	nucleus	distribution	asymptote	asymptote	maximum response	maximum response	maximum response nucleus H2AX distribution
895	1	pheno1	1	187.359624	7.012949963	187.027017	187.521049	d_nonborder_nucleus_radial_relative_deviation_ser_dark_2_mean_per_well	nonborder_nucleus_radial_relative_deviation_ser_dark_2_mean_per_well	d	Hoechst	nucleus	distribution	asymptote	asymptote	NA	baseline	baseline nucleus Hoechst distribution
896	1	pheno1	2	31.422094	6.078884169	30.231071	165.136772	d_nonborder_nucleus_radial_relative_deviation_ser_dark_mean_per_well	nonborder_nucleus_radial_relative_deviation_ser_dark_mean_per_well	d	H2AX	nucleus	distribution	asymptote	asymptote	NA	baseline	baseline nucleus H2AX distribution
897	1	pheno1	12	109.096213	7.938174799	108.057591	109.410742	d_nonborder_nucleus_radial_relative_deviation_ser_edge_2_mean_per_well	nonborder_nucleus_radial_relative_deviation_ser_edge_2_mean_per_well	d	Hoechst	nucleus	distribution	asymptote	asymptote	NA	baseline	baseline nucleus Hoechst distribution
898	1	pheno1	2	30.253642	7.116976124	29.20528	80.032394	d_nonborder_nucleus_radial_relative_deviation_ser_edge_mean_per_well	nonborder_nucleus_radial_relative_deviation_ser_edge_mean_per_well	d	H2AX	nucleus	distribution	asymptote	asymptote	NA	baseline	baseline nucleus H2AX distribution
899	1	pheno1	15	49.498038	8.487353954	48.848292	50.492847	d_nonborder_nucleus_radial_relative_deviation_ser_hole_2_mean_per_well	nonborder_nucleus_radial_relative_deviation_ser_hole_2_mean_per_well	d	Hoechst	nucleus	distribution	asymptote	asymptote	NA	baseline	baseline nucleus Hoechst distribution
900	1	pheno1	2	164.877189	6.188763937	163.997279	167.060183	d_nonborder_nucleus_radial_relative_deviation_ser_hole_mean_per_well	nonborder_nucleus_radial_relative_deviation_ser_hole_mean_per_well	d	H2AX	nucleus	distribution	asymptote	asymptote	NA	baseline	baseline nucleus H2AX distribution
901	1	pheno1	2	30.231071	5.800434169	29.108974	148.871932	d_nonborder_nucleus_radial_relative_deviation_ser_ridge_2_mean_per_well	nonborder_nucleus_radial_relative_deviation_ser_ridge_2_mean_per_well	d	Hoechst	nucleus	distribution	asymptote	asymptote	maximum response	maximum response	maximum response nucleus Hoechst distribution
902	1	pheno1	11	105.557304	6.752366183	104.953294	106.337826	d_nonborder_nucleus_radial_relative_deviation_ser_ridge_mean_per_well	nonborder_nucleus_radial_relative_deviation_ser_ridge_mean_per_well	d	H2AX	nucleus	distribution	asymptote	asymptote	maximum response	maximum response	maximum response nucleus H2AX distribution
903	1	pheno1	7	96.591268	6.190194064	96.149758	96.827463	d_nonborder_nucleus_radial_relative_deviation_ser_saddle_2_mean_per_well	nonborder_nucleus_radial_relative_deviation_ser_saddle_2_mean_per_well	d	Hoechst	nucleus	distribution	asymptote	asymptote	NA	baseline	baseline nucleus Hoechst distribution
904	1	pheno1	7	96.591268	7.320052258	96.149758	96.837106	d_nonborder_nucleus_radial_relative_deviation_ser_saddle_mean_per_well	nonborder_nucleus_radial_relative_deviation_ser_saddle_mean_per_well	d	H2AX	nucleus	distribution	asymptote	asymptote	NA	baseline	baseline nucleus H2AX distribution
905	1	pheno1	18	38.759653	6.567188954	38.690281	38.934898	d_nonborder_nucleus_radial_relative_deviation_ser_spot_2_mean_per_well	nonborder_nucleus_radial_relative_deviation_ser_spot_2_mean_per_well	d	Hoechst	nucleus	distribution	asymptote	asymptote	NA	baseline	baseline nucleus Hoechst distribution
906	1	pheno1	12	118.228994	6.418080508	117.577251	120.017431	d_nonborder_nucleus_radial_relative_deviation_ser_spot_mean_per_well	nonborder_nucleus_radial_relative_deviation_ser_spot_mean_per_well	d	H2AX	nucleus	distribution	asymptote	asymptote	maximum response	maximum response	maximum response nucleus H2AX distribution
907	1	pheno1	1	187.359624	6.865382685	187.027017	187.521049	d_nonborder_nucleus_radial_relative_deviation_ser_valley_2_mean_per_well	nonborder_nucleus_radial_relative_deviation_ser_valley_2_mean_per_well	d	Hoechst	nucleus	distribution	asymptote	asymptote	NA	baseline	baseline nucleus Hoechst distribution
908	1	pheno1	7	96.574454	6.750131353	96.149758	98.523374	d_nonborder_nucleus_radial_relative_deviation_ser_valley_mean_per_well	nonborder_nucleus_radial_relative_deviation_ser_valley_mean_per_well	d	H2AX	nucleus	distribution	asymptote	asymptote	NA	baseline	baseline nucleus H2AX distribution
909	1	pheno1	16	45.793516	7.385765749	45.657531	48.19071	d_nonborder_nucleus_ratio_width_to_length_mean_per_well	nonborder_nucleus_ratio_width_to_length_mean_per_well	d	Hoechst	nucleus	shape	asymptote	asymptote	maximum response	maximum response	maximum response nucleus Hoechst shape
910	1	pheno1	12	10.681822	7.045540792	10.391148	11.876992	d_nonborder_nucleus_roundness_mean_per_well	nonborder_nucleus_roundness_mean_per_well	d	Hoechst	nucleus	shape	asymptote	asymptote	maximum response	maximum response	maximum response nucleus Hoechst shape
911	1	pheno1	19	17.495146	6.762347569	17.143163	58.373399	d_nonborder_nucleus_symmetry_02_2_mean_per_well	nonborder_nucleus_symmetry_02_2_mean_per_well	d	Hoechst	nucleus	distribution	asymptote	asymptote	NA	baseline	baseline nucleus Hoechst distribution
912	1	pheno1	19	17.591307	7.168637192	17.211021	58.373399	d_nonborder_nucleus_symmetry_02_mean_per_well	nonborder_nucleus_symmetry_02_mean_per_well	d	H2AX	nucleus	distribution	asymptote	asymptote	NA	baseline	baseline nucleus H2AX distribution
913	1	pheno1	2	29.260594	7.112721013	29.108974	37.123556	d_nonborder_nucleus_symmetry_02_ser_bright_2_mean_per_well	nonborder_nucleus_symmetry_02_ser_bright_2_mean_per_well	d	Hoechst	nucleus	distribution	asymptote	asymptote	NA	baseline	baseline nucleus Hoechst distribution
914	1	pheno1	8	34.641118	7.644248752	34.388168	34.811708	d_nonborder_nucleus_symmetry_02_ser_bright_mean_per_well	nonborder_nucleus_symmetry_02_ser_bright_mean_per_well	d	H2AX	nucleus	distribution	asymptote	asymptote	maximum response	maximum response	maximum response nucleus H2AX distribution
915	1	pheno1	2	152.923162	7.462365783	152.74809	153.721226	d_nonborder_nucleus_symmetry_02_ser_dark_2_mean_per_well	nonborder_nucleus_symmetry_02_ser_dark_2_mean_per_well	d	Hoechst	nucleus	distribution	asymptote	asymptote	NA	baseline	baseline nucleus Hoechst distribution
916	1	pheno1	7	96.591268	8.537268423	96.149758	96.837106	d_nonborder_nucleus_symmetry_02_ser_dark_mean_per_well	nonborder_nucleus_symmetry_02_ser_dark_mean_per_well	d	H2AX	nucleus	distribution	asymptote	asymptote	NA	baseline	baseline nucleus H2AX distribution
917	1	pheno1	7	96.591268	7.018385982	96.149758	97.491813	d_nonborder_nucleus_symmetry_02_ser_edge_2_mean_per_well	nonborder_nucleus_symmetry_02_ser_edge_2_mean_per_well	d	Hoechst	nucleus	distribution	asymptote	asymptote	NA	baseline	baseline nucleus Hoechst distribution
918	1	pheno1	7	96.591268	7.034332309	96.149758	100.162058	d_nonborder_nucleus_symmetry_02_ser_edge_mean_per_well	nonborder_nucleus_symmetry_02_ser_edge_mean_per_well	d	H2AX	nucleus	distribution	asymptote	asymptote	NA	baseline	baseline nucleus H2AX distribution
919	1	pheno1	1	11.914562	6.596577113	5.955038	24.9152	d_nonborder_nucleus_symmetry_02_ser_hole_2_mean_per_well	nonborder_nucleus_symmetry_02_ser_hole_2_mean_per_well	d	Hoechst	nucleus	distribution	asymptote	asymptote	maximum response	maximum response	maximum response nucleus Hoechst distribution
920	1	pheno1	8	62.124356	6.700653879	37.180863	65.656511	d_nonborder_nucleus_symmetry_02_ser_hole_mean_per_well	nonborder_nucleus_symmetry_02_ser_hole_mean_per_well	d	H2AX	nucleus	distribution	asymptote	asymptote	maximum response	maximum response	maximum response nucleus H2AX distribution
921	1	pheno1	16	44.750096	6.789694494	44.693093	77.646231	d_nonborder_nucleus_symmetry_02_ser_ridge_2_mean_per_well	nonborder_nucleus_symmetry_02_ser_ridge_2_mean_per_well	d	Hoechst	nucleus	distribution	asymptote	asymptote	NA	baseline	baseline nucleus Hoechst distribution
922	1	pheno1	13	118.430323	7.499058108	118.304234	118.442746	d_nonborder_nucleus_symmetry_02_ser_ridge_mean_per_well	nonborder_nucleus_symmetry_02_ser_ridge_mean_per_well	d	H2AX	nucleus	distribution	asymptote	asymptote	maximum response	maximum response	maximum response nucleus H2AX distribution
923	1	pheno1	13	17.837877	6.934936072	15.970456	113.968606	d_nonborder_nucleus_symmetry_02_ser_saddle_2_mean_per_well	nonborder_nucleus_symmetry_02_ser_saddle_2_mean_per_well	d	Hoechst	nucleus	distribution	asymptote	asymptote	NA	baseline	baseline nucleus Hoechst distribution
924	1	pheno1	7	96.591268	7.73117851	96.149758	96.782363	d_nonborder_nucleus_symmetry_02_ser_saddle_mean_per_well	nonborder_nucleus_symmetry_02_ser_saddle_mean_per_well	d	H2AX	nucleus	distribution	asymptote	asymptote	NA	baseline	baseline nucleus H2AX distribution
925	1	pheno1	12	102.203004	6.611445215	28.558966	109.108823	d_nonborder_nucleus_symmetry_02_ser_spot_2_mean_per_well	nonborder_nucleus_symmetry_02_ser_spot_2_mean_per_well	d	Hoechst	nucleus	distribution	asymptote	asymptote	maximum response	maximum response	maximum response nucleus Hoechst distribution
926	1	pheno1	6	120.450915	6.248764352	104.180074	120.642133	d_nonborder_nucleus_symmetry_02_ser_spot_mean_per_well	nonborder_nucleus_symmetry_02_ser_spot_mean_per_well	d	H2AX	nucleus	distribution	asymptote	asymptote	maximum response	maximum response	maximum response nucleus H2AX distribution
927	1	pheno1	16	36.688178	7.040769577	36.644084	38.007087	d_nonborder_nucleus_symmetry_02_ser_valley_2_mean_per_well	nonborder_nucleus_symmetry_02_ser_valley_2_mean_per_well	d	Hoechst	nucleus	distribution	asymptote	asymptote	NA	baseline	baseline nucleus Hoechst distribution
928	1	pheno1	7	96.591268	8.929497352	96.149758	96.837106	d_nonborder_nucleus_symmetry_02_ser_valley_mean_per_well	nonborder_nucleus_symmetry_02_ser_valley_mean_per_well	d	H2AX	nucleus	distribution	asymptote	asymptote	NA	baseline	baseline nucleus H2AX distribution
929	1	pheno1	5	126.612953	5.782771832	126.508072	126.972467	d_nonborder_nucleus_symmetry_03_2_mean_per_well	nonborder_nucleus_symmetry_03_2_mean_per_well	d	Hoechst	nucleus	distribution	asymptote	asymptote	NA	baseline	baseline nucleus Hoechst distribution
930	1	pheno1	7	96.734153	6.197192102	96.00845	134.735563	d_nonborder_nucleus_symmetry_03_mean_per_well	nonborder_nucleus_symmetry_03_mean_per_well	d	H2AX	nucleus	distribution	asymptote	asymptote	maximum response	maximum response	maximum response nucleus H2AX distribution
931	1	pheno1	6	33.136405	7.682917608	33.013153	33.227463	d_nonborder_nucleus_symmetry_03_ser_bright_2_mean_per_well	nonborder_nucleus_symmetry_03_ser_bright_2_mean_per_well	d	Hoechst	nucleus	distribution	asymptote	asymptote	maximum response	maximum response	maximum response nucleus Hoechst distribution
932	1	pheno1	19	58.244481	6.806927762	56.064108	58.365001	d_nonborder_nucleus_symmetry_03_ser_bright_mean_per_well	nonborder_nucleus_symmetry_03_ser_bright_mean_per_well	d	H2AX	nucleus	distribution	asymptote	asymptote	maximum response	maximum response	maximum response nucleus H2AX distribution
933	1	pheno1	18	82.583009	6.920627033	82.48466	82.910228	d_nonborder_nucleus_symmetry_03_ser_dark_2_mean_per_well	nonborder_nucleus_symmetry_03_ser_dark_2_mean_per_well	d	Hoechst	nucleus	distribution	asymptote	asymptote	maximum response	maximum response	maximum response nucleus Hoechst distribution
934	1	pheno1	7	36.716982	6.369920578	36.416792	37.050264	d_nonborder_nucleus_symmetry_03_ser_dark_mean_per_well	nonborder_nucleus_symmetry_03_ser_dark_mean_per_well	d	H2AX	nucleus	distribution	asymptote	asymptote	maximum response	maximum response	maximum response nucleus H2AX distribution
935	1	pheno1	16	39.555563	6.473128757	37.916474	39.938951	d_nonborder_nucleus_symmetry_03_ser_edge_2_mean_per_well	nonborder_nucleus_symmetry_03_ser_edge_2_mean_per_well	d	Hoechst	nucleus	distribution	asymptote	asymptote	NA	baseline	baseline nucleus Hoechst distribution
936	1	pheno1	1	155.860718	6.188526628	155.665095	185.650655	d_nonborder_nucleus_symmetry_03_ser_edge_mean_per_well	nonborder_nucleus_symmetry_03_ser_edge_mean_per_well	d	H2AX	nucleus	distribution	asymptote	asymptote	NA	baseline	baseline nucleus H2AX distribution
937	1	pheno1	2	50.325046	6.50878385	28.703343	50.640741	d_nonborder_nucleus_symmetry_03_ser_hole_2_mean_per_well	nonborder_nucleus_symmetry_03_ser_hole_2_mean_per_well	d	Hoechst	nucleus	distribution	asymptote	asymptote	maximum response	maximum response	maximum response nucleus Hoechst distribution
938	1	pheno1	8	46.143755	7.693268644	45.384264	48.008167	d_nonborder_nucleus_symmetry_03_ser_hole_mean_per_well	nonborder_nucleus_symmetry_03_ser_hole_mean_per_well	d	H2AX	nucleus	distribution	asymptote	asymptote	maximum response	maximum response	maximum response nucleus H2AX distribution
939	1	pheno1	12	90.703043	5.757650904	4.026321	118.886324	d_nonborder_nucleus_symmetry_03_ser_ridge_2_mean_per_well	nonborder_nucleus_symmetry_03_ser_ridge_2_mean_per_well	d	Hoechst	nucleus	distribution	asymptote	asymptote	maximum response	maximum response	maximum response nucleus Hoechst distribution
940	1	pheno1	12	76.432413	6.097744475	3.0327	77.763943	d_nonborder_nucleus_symmetry_03_ser_ridge_mean_per_well	nonborder_nucleus_symmetry_03_ser_ridge_mean_per_well	d	H2AX	nucleus	distribution	asymptote	asymptote	maximum response	maximum response	maximum response nucleus H2AX distribution
941	1	pheno1	8	36.382918	7.046293135	36.328202	121.245724	d_nonborder_nucleus_symmetry_03_ser_saddle_2_mean_per_well	nonborder_nucleus_symmetry_03_ser_saddle_2_mean_per_well	d	Hoechst	nucleus	distribution	asymptote	asymptote	maximum response	maximum response	maximum response nucleus Hoechst distribution
942	1	pheno1	6	142.76747	6.24866674	64.049481	142.860829	d_nonborder_nucleus_symmetry_03_ser_saddle_mean_per_well	nonborder_nucleus_symmetry_03_ser_saddle_mean_per_well	d	H2AX	nucleus	distribution	asymptote	asymptote	maximum response	maximum response	maximum response nucleus H2AX distribution
943	1	pheno1	9	69.730437	6.693240509	37.342479	70.074527	d_nonborder_nucleus_symmetry_03_ser_spot_2_mean_per_well	nonborder_nucleus_symmetry_03_ser_spot_2_mean_per_well	d	Hoechst	nucleus	distribution	asymptote	asymptote	maximum response	maximum response	maximum response nucleus Hoechst distribution
944	1	pheno1	1	153.241617	7.390497455	152.327757	153.897279	d_nonborder_nucleus_symmetry_03_ser_spot_mean_per_well	nonborder_nucleus_symmetry_03_ser_spot_mean_per_well	d	H2AX	nucleus	distribution	asymptote	asymptote	maximum response	maximum response	maximum response nucleus H2AX distribution
945	1	pheno1	15	26.587237	7.205972681	22.634449	26.93266	d_nonborder_nucleus_symmetry_03_ser_valley_mean_per_well	nonborder_nucleus_symmetry_03_ser_valley_mean_per_well	d	H2AX	nucleus	distribution	asymptote	asymptote	maximum response	maximum response	maximum response nucleus H2AX distribution
946	1	pheno1	2	29.260594	6.974203909	29.108974	37.458803	d_nonborder_nucleus_symmetry_04_2_mean_per_well	nonborder_nucleus_symmetry_04_2_mean_per_well	d	Hoechst	nucleus	distribution	asymptote	asymptote	NA	baseline	baseline nucleus Hoechst distribution
947	1	pheno1	2	34.992125	6.783231942	29.215733	37.188361	d_nonborder_nucleus_symmetry_04_mean_per_well	nonborder_nucleus_symmetry_04_mean_per_well	d	H2AX	nucleus	distribution	asymptote	asymptote	NA	baseline	baseline nucleus H2AX distribution
948	1	pheno1	5	35.063549	6.488413411	34.537134	36.824543	d_nonborder_nucleus_symmetry_04_ser_bright_2_mean_per_well	nonborder_nucleus_symmetry_04_ser_bright_2_mean_per_well	d	Hoechst	nucleus	distribution	asymptote	asymptote	NA	baseline	baseline nucleus Hoechst distribution
949	1	pheno1	X	101.873602	6.887730003	101.285283	142.600385	d_nonborder_nucleus_symmetry_04_ser_bright_mean_per_well	nonborder_nucleus_symmetry_04_ser_bright_mean_per_well	d	H2AX	nucleus	distribution	asymptote	asymptote	maximum response	maximum response	maximum response nucleus H2AX distribution
950	1	pheno1	6	54.057349	6.509533794	53.959209	56.173726	d_nonborder_nucleus_symmetry_04_ser_dark_2_mean_per_well	nonborder_nucleus_symmetry_04_ser_dark_2_mean_per_well	d	Hoechst	nucleus	distribution	asymptote	asymptote	maximum response	maximum response	maximum response nucleus Hoechst distribution
951	1	pheno1	X	163.244938	6.044609469	160.997034	168.99593	d_nonborder_nucleus_symmetry_04_ser_dark_mean_per_well	nonborder_nucleus_symmetry_04_ser_dark_mean_per_well	d	H2AX	nucleus	distribution	asymptote	asymptote	maximum response	maximum response	maximum response nucleus H2AX distribution
952	1	pheno1	7	96.591268	7.815019773	96.00845	97.52232	d_nonborder_nucleus_symmetry_04_ser_edge_2_mean_per_well	nonborder_nucleus_symmetry_04_ser_edge_2_mean_per_well	d	Hoechst	nucleus	distribution	asymptote	asymptote	NA	baseline	baseline nucleus Hoechst distribution
953	1	pheno1	7	96.65027	8.664244548	96.149758	96.837106	d_nonborder_nucleus_symmetry_04_ser_edge_mean_per_well	nonborder_nucleus_symmetry_04_ser_edge_mean_per_well	d	H2AX	nucleus	distribution	asymptote	asymptote	NA	baseline	baseline nucleus H2AX distribution
954	1	pheno1	16	30.64183	6.292916265	30.245519	31.612849	d_nonborder_nucleus_symmetry_04_ser_hole_2_mean_per_well	nonborder_nucleus_symmetry_04_ser_hole_2_mean_per_well	d	Hoechst	nucleus	distribution	asymptote	asymptote	maximum response	maximum response	maximum response nucleus Hoechst distribution
955	1	pheno1	2	78.896856	6.887313172	78.757549	78.945092	d_nonborder_nucleus_symmetry_04_ser_hole_mean_per_well	nonborder_nucleus_symmetry_04_ser_hole_mean_per_well	d	H2AX	nucleus	distribution	asymptote	asymptote	maximum response	maximum response	maximum response nucleus H2AX distribution
956	1	pheno1	1	78.08332	5.967169064	3.010274	79.604561	d_nonborder_nucleus_symmetry_04_ser_ridge_2_mean_per_well	nonborder_nucleus_symmetry_04_ser_ridge_2_mean_per_well	d	Hoechst	nucleus	distribution	asymptote	asymptote	maximum response	maximum response	maximum response nucleus Hoechst distribution
957	1	pheno1	2	35.651104	6.853910914	35.006829	174.746423	d_nonborder_nucleus_symmetry_04_ser_ridge_mean_per_well	nonborder_nucleus_symmetry_04_ser_ridge_mean_per_well	d	H2AX	nucleus	distribution	asymptote	asymptote	maximum response	maximum response	maximum response nucleus H2AX distribution
958	1	pheno1	7	96.65027	6.326019386	3.233459	120.942767	d_nonborder_nucleus_symmetry_04_ser_saddle_2_mean_per_well	nonborder_nucleus_symmetry_04_ser_saddle_2_mean_per_well	d	Hoechst	nucleus	distribution	asymptote	asymptote	NA	baseline	baseline nucleus Hoechst distribution
959	1	pheno1	16	91.48495	5.893734514	60.2434	93.653557	d_nonborder_nucleus_symmetry_04_ser_saddle_mean_per_well	nonborder_nucleus_symmetry_04_ser_saddle_mean_per_well	d	H2AX	nucleus	distribution	asymptote	asymptote	maximum response	maximum response	maximum response nucleus H2AX distribution
960	1	pheno1	16	29.450963	6.574655329	28.975168	29.50554	d_nonborder_nucleus_symmetry_04_ser_spot_2_mean_per_well	nonborder_nucleus_symmetry_04_ser_spot_2_mean_per_well	d	Hoechst	nucleus	distribution	asymptote	asymptote	NA	baseline	baseline nucleus Hoechst distribution
961	1	pheno1	9	115.188688	6.128821575	30.412735	115.356982	d_nonborder_nucleus_symmetry_04_ser_spot_mean_per_well	nonborder_nucleus_symmetry_04_ser_spot_mean_per_well	d	H2AX	nucleus	distribution	asymptote	asymptote	maximum response	maximum response	maximum response nucleus H2AX distribution
962	1	pheno1	X	105.657838	6.787933879	105.244931	118.040838	d_nonborder_nucleus_symmetry_04_ser_valley_2_mean_per_well	nonborder_nucleus_symmetry_04_ser_valley_2_mean_per_well	d	Hoechst	nucleus	distribution	asymptote	asymptote	maximum response	maximum response	maximum response nucleus Hoechst distribution
963	1	pheno1	11	53.592913	6.589484702	53.549729	53.956593	d_nonborder_nucleus_symmetry_04_ser_valley_mean_per_well	nonborder_nucleus_symmetry_04_ser_valley_mean_per_well	d	H2AX	nucleus	distribution	asymptote	asymptote	maximum response	maximum response	maximum response nucleus H2AX distribution
964	1	pheno1	16	39.614006	7.346595963	38.373578	39.970936	d_nonborder_nucleus_symmetry_05_2_mean_per_well	nonborder_nucleus_symmetry_05_2_mean_per_well	d	Hoechst	nucleus	distribution	asymptote	asymptote	NA	baseline	baseline nucleus Hoechst distribution
965	1	pheno1	17	52.166118	7.215343576	51.734876	52.510153	d_nonborder_nucleus_symmetry_05_mean_per_well	nonborder_nucleus_symmetry_05_mean_per_well	d	H2AX	nucleus	distribution	asymptote	asymptote	maximum response	maximum response	maximum response nucleus H2AX distribution
966	1	pheno1	11	105.914503	6.048464909	104.987537	106.323102	d_nonborder_nucleus_symmetry_05_ser_bright_2_mean_per_well	nonborder_nucleus_symmetry_05_ser_bright_2_mean_per_well	d	Hoechst	nucleus	distribution	asymptote	asymptote	NA	baseline	baseline nucleus Hoechst distribution
967	1	pheno1	9	21.435613	6.874872121	21.207179	25.179803	d_nonborder_nucleus_symmetry_05_ser_bright_mean_per_well	nonborder_nucleus_symmetry_05_ser_bright_mean_per_well	d	H2AX	nucleus	distribution	asymptote	asymptote	maximum response	maximum response	maximum response nucleus H2AX distribution
968	1	pheno1	10	8.713989	6.23701525	3.174515	25.630783	d_nonborder_nucleus_symmetry_05_ser_dark_2_mean_per_well	nonborder_nucleus_symmetry_05_ser_dark_2_mean_per_well	d	Hoechst	nucleus	distribution	asymptote	asymptote	maximum response	maximum response	maximum response nucleus Hoechst distribution
969	1	pheno1	14	12.396621	6.394794323	10.719895	75.701511	d_nonborder_nucleus_symmetry_05_ser_dark_mean_per_well	nonborder_nucleus_symmetry_05_ser_dark_mean_per_well	d	H2AX	nucleus	distribution	asymptote	asymptote	maximum response	maximum response	maximum response nucleus H2AX distribution
970	1	pheno1	16	39.614006	6.818832728	38.985569	40.160888	d_nonborder_nucleus_symmetry_05_ser_edge_2_mean_per_well	nonborder_nucleus_symmetry_05_ser_edge_2_mean_per_well	d	Hoechst	nucleus	distribution	asymptote	asymptote	NA	baseline	baseline nucleus Hoechst distribution
971	1	pheno1	12	29.705009	8.725566823	29.43847	30.295878	d_nonborder_nucleus_symmetry_05_ser_edge_mean_per_well	nonborder_nucleus_symmetry_05_ser_edge_mean_per_well	d	H2AX	nucleus	distribution	asymptote	asymptote	NA	baseline	baseline nucleus H2AX distribution
972	1	pheno1	2	50.325046	7.021489348	49.711871	50.640741	d_nonborder_nucleus_symmetry_05_ser_hole_2_mean_per_well	nonborder_nucleus_symmetry_05_ser_hole_2_mean_per_well	d	Hoechst	nucleus	distribution	asymptote	asymptote	maximum response	maximum response	maximum response nucleus Hoechst distribution
973	1	pheno1	8	46.093204	6.541177824	37.096282	120.938812	d_nonborder_nucleus_symmetry_05_ser_hole_mean_per_well	nonborder_nucleus_symmetry_05_ser_hole_mean_per_well	d	H2AX	nucleus	distribution	asymptote	asymptote	maximum response	maximum response	maximum response nucleus H2AX distribution
974	1	pheno1	12	107.816789	6.698823551	107.547589	109.410742	d_nonborder_nucleus_symmetry_05_ser_ridge_2_mean_per_well	nonborder_nucleus_symmetry_05_ser_ridge_2_mean_per_well	d	Hoechst	nucleus	distribution	asymptote	asymptote	NA	baseline	baseline nucleus Hoechst distribution
975	1	pheno1	1	187.898181	6.147650169	187.528221	187.936066	d_nonborder_nucleus_symmetry_05_ser_ridge_mean_per_well	nonborder_nucleus_symmetry_05_ser_ridge_mean_per_well	d	H2AX	nucleus	distribution	asymptote	asymptote	maximum response	maximum response	maximum response nucleus H2AX distribution
976	1	pheno1	15	41.325723	6.662681636	40.105403	41.743262	d_nonborder_nucleus_symmetry_05_ser_saddle_2_mean_per_well	nonborder_nucleus_symmetry_05_ser_saddle_2_mean_per_well	d	Hoechst	nucleus	distribution	asymptote	asymptote	NA	baseline	baseline nucleus Hoechst distribution
977	1	pheno1	16	23.778904	6.448919199	23.147202	24.353035	d_nonborder_nucleus_symmetry_05_ser_saddle_mean_per_well	nonborder_nucleus_symmetry_05_ser_saddle_mean_per_well	d	H2AX	nucleus	distribution	asymptote	asymptote	maximum response	maximum response	maximum response nucleus H2AX distribution
978	1	pheno1	11	105.914503	7.711895053	104.604513	106.323102	d_nonborder_nucleus_symmetry_05_ser_spot_2_mean_per_well	nonborder_nucleus_symmetry_05_ser_spot_2_mean_per_well	d	Hoechst	nucleus	distribution	asymptote	asymptote	NA	baseline	baseline nucleus Hoechst distribution
979	1	pheno1	4	22.964487	6.409798661	20.726944	90.407149	d_nonborder_nucleus_symmetry_05_ser_spot_mean_per_well	nonborder_nucleus_symmetry_05_ser_spot_mean_per_well	d	H2AX	nucleus	distribution	asymptote	asymptote	maximum response	maximum response	maximum response nucleus H2AX distribution
980	1	pheno1	2	99.497446	6.205787007	43.981019	101.370114	d_nonborder_nucleus_symmetry_05_ser_valley_2_mean_per_well	nonborder_nucleus_symmetry_05_ser_valley_2_mean_per_well	d	Hoechst	nucleus	distribution	asymptote	asymptote	maximum response	maximum response	maximum response nucleus Hoechst distribution
981	1	pheno1	4	45.761461	6.534931946	42.892748	74.570126	d_nonborder_nucleus_symmetry_05_ser_valley_mean_per_well	nonborder_nucleus_symmetry_05_ser_valley_mean_per_well	d	H2AX	nucleus	distribution	asymptote	asymptote	maximum response	maximum response	maximum response nucleus H2AX distribution
982	1	pheno1	19	17.495146	6.357544989	17.143163	58.660592	d_nonborder_nucleus_symmetry_12_2_mean_per_well	nonborder_nucleus_symmetry_12_2_mean_per_well	d	Hoechst	nucleus	distribution	asymptote	asymptote	NA	baseline	baseline nucleus Hoechst distribution
983	1	pheno1	19	17.591307	6.987102196	17.211021	58.373399	d_nonborder_nucleus_symmetry_12_mean_per_well	nonborder_nucleus_symmetry_12_mean_per_well	d	H2AX	nucleus	distribution	asymptote	asymptote	NA	baseline	baseline nucleus H2AX distribution
984	1	pheno1	2	31.441012	7.355378729	29.108974	39.065265	d_nonborder_nucleus_symmetry_12_ser_bright_2_mean_per_well	nonborder_nucleus_symmetry_12_ser_bright_2_mean_per_well	d	Hoechst	nucleus	distribution	asymptote	asymptote	NA	baseline	baseline nucleus Hoechst distribution
985	1	pheno1	19	17.495146	7.079256981	17.211021	18.067598	d_nonborder_nucleus_symmetry_12_ser_bright_mean_per_well	nonborder_nucleus_symmetry_12_ser_bright_mean_per_well	d	H2AX	nucleus	distribution	asymptote	asymptote	NA	baseline	baseline nucleus H2AX distribution
986	1	pheno1	7	96.60941	7.05113175	96.149758	98.035563	d_nonborder_nucleus_symmetry_12_ser_dark_2_mean_per_well	nonborder_nucleus_symmetry_12_ser_dark_2_mean_per_well	d	Hoechst	nucleus	distribution	asymptote	asymptote	NA	baseline	baseline nucleus Hoechst distribution
987	1	pheno1	7	96.591268	7.670923892	96.149758	96.832317	d_nonborder_nucleus_symmetry_12_ser_dark_mean_per_well	nonborder_nucleus_symmetry_12_ser_dark_mean_per_well	d	H2AX	nucleus	distribution	asymptote	asymptote	NA	baseline	baseline nucleus H2AX distribution
988	1	pheno1	7	96.591268	6.919663679	96.149758	98.035563	d_nonborder_nucleus_symmetry_12_ser_edge_2_mean_per_well	nonborder_nucleus_symmetry_12_ser_edge_2_mean_per_well	d	Hoechst	nucleus	distribution	asymptote	asymptote	NA	baseline	baseline nucleus Hoechst distribution
989	1	pheno1	7	96.591268	7.057733109	96.149758	100.147361	d_nonborder_nucleus_symmetry_12_ser_edge_mean_per_well	nonborder_nucleus_symmetry_12_ser_edge_mean_per_well	d	H2AX	nucleus	distribution	asymptote	asymptote	NA	baseline	baseline nucleus H2AX distribution
990	1	pheno1	18	56.710988	6.089602348	31.37956	57.128028	d_nonborder_nucleus_symmetry_12_ser_hole_2_mean_per_well	nonborder_nucleus_symmetry_12_ser_hole_2_mean_per_well	d	Hoechst	nucleus	distribution	asymptote	asymptote	maximum response	maximum response	maximum response nucleus Hoechst distribution
991	1	pheno1	13	88.782048	6.322094228	86.523377	92.174596	d_nonborder_nucleus_symmetry_12_ser_hole_mean_per_well	nonborder_nucleus_symmetry_12_ser_hole_mean_per_well	d	H2AX	nucleus	distribution	asymptote	asymptote	maximum response	maximum response	maximum response nucleus H2AX distribution
992	1	pheno1	16	73.095527	6.281752371	36.68557	73.818445	d_nonborder_nucleus_symmetry_12_ser_ridge_2_mean_per_well	nonborder_nucleus_symmetry_12_ser_ridge_2_mean_per_well	d	Hoechst	nucleus	distribution	asymptote	asymptote	NA	baseline	baseline nucleus Hoechst distribution
993	1	pheno1	19	17.591307	7.5512413	17.315125	17.666891	d_nonborder_nucleus_symmetry_12_ser_ridge_mean_per_well	nonborder_nucleus_symmetry_12_ser_ridge_mean_per_well	d	H2AX	nucleus	distribution	asymptote	asymptote	NA	baseline	baseline nucleus H2AX distribution
994	1	pheno1	13	17.783421	6.96267117	15.970456	114.172813	d_nonborder_nucleus_symmetry_12_ser_saddle_2_mean_per_well	nonborder_nucleus_symmetry_12_ser_saddle_2_mean_per_well	d	Hoechst	nucleus	distribution	asymptote	asymptote	NA	baseline	baseline nucleus Hoechst distribution
995	1	pheno1	7	96.591268	6.646159902	96.149758	97.175912	d_nonborder_nucleus_symmetry_12_ser_saddle_mean_per_well	nonborder_nucleus_symmetry_12_ser_saddle_mean_per_well	d	H2AX	nucleus	distribution	asymptote	asymptote	NA	baseline	baseline nucleus H2AX distribution
996	1	pheno1	2	33.818007	7.375033993	29.551388	37.123556	d_nonborder_nucleus_symmetry_12_ser_spot_2_mean_per_well	nonborder_nucleus_symmetry_12_ser_spot_2_mean_per_well	d	Hoechst	nucleus	distribution	asymptote	asymptote	NA	baseline	baseline nucleus Hoechst distribution
997	1	pheno1	13	118.430323	7.187213895	118.304234	118.830395	d_nonborder_nucleus_symmetry_12_ser_spot_mean_per_well	nonborder_nucleus_symmetry_12_ser_spot_mean_per_well	d	H2AX	nucleus	distribution	asymptote	asymptote	maximum response	maximum response	maximum response nucleus H2AX distribution
998	1	pheno1	10	26.859169	6.640779434	26.382497	27.084537	d_nonborder_nucleus_symmetry_12_ser_valley_2_mean_per_well	nonborder_nucleus_symmetry_12_ser_valley_2_mean_per_well	d	Hoechst	nucleus	distribution	asymptote	asymptote	NA	baseline	baseline nucleus Hoechst distribution
999	1	pheno1	7	96.591268	8.365127301	96.149758	96.832317	d_nonborder_nucleus_symmetry_12_ser_valley_mean_per_well	nonborder_nucleus_symmetry_12_ser_valley_mean_per_well	d	H2AX	nucleus	distribution	asymptote	asymptote	NA	baseline	baseline nucleus H2AX distribution
1000	1	pheno1	2	81.023401	6.045006013	79.354155	82.438262	d_nonborder_nucleus_symmetry_13_2_mean_per_well	nonborder_nucleus_symmetry_13_2_mean_per_well	d	Hoechst	nucleus	distribution	asymptote	asymptote	maximum response	maximum response	maximum response nucleus Hoechst distribution
1001	1	pheno1	8	37.740322	6.839109823	36.36282	40.030246	d_nonborder_nucleus_symmetry_13_ser_bright_2_mean_per_well	nonborder_nucleus_symmetry_13_ser_bright_2_mean_per_well	d	Hoechst	nucleus	distribution	asymptote	asymptote	maximum response	maximum response	maximum response nucleus Hoechst distribution
1002	1	pheno1	18	64.661759	6.792561016	63.341865	64.770297	d_nonborder_nucleus_symmetry_13_ser_bright_mean_per_well	nonborder_nucleus_symmetry_13_ser_bright_mean_per_well	d	H2AX	nucleus	distribution	asymptote	asymptote	maximum response	maximum response	maximum response nucleus H2AX distribution
1003	1	pheno1	14	75.819643	8.233598625	75.681737	76.871517	d_nonborder_nucleus_symmetry_13_ser_dark_2_mean_per_well	nonborder_nucleus_symmetry_13_ser_dark_2_mean_per_well	d	Hoechst	nucleus	distribution	asymptote	asymptote	NA	baseline	baseline nucleus Hoechst distribution
1004	1	pheno1	2	78.358533	6.228793229	78.35151	153.696216	d_nonborder_nucleus_symmetry_13_ser_dark_mean_per_well	nonborder_nucleus_symmetry_13_ser_dark_mean_per_well	d	H2AX	nucleus	distribution	asymptote	asymptote	maximum response	maximum response	maximum response nucleus H2AX distribution
1005	1	pheno1	12	109.096213	6.624219642	46.526015	109.410742	d_nonborder_nucleus_symmetry_13_ser_edge_2_mean_per_well	nonborder_nucleus_symmetry_13_ser_edge_2_mean_per_well	d	Hoechst	nucleus	distribution	asymptote	asymptote	NA	baseline	baseline nucleus Hoechst distribution
1006	1	pheno1	2	79.951703	7.008394167	79.354155	80.98043	d_nonborder_nucleus_symmetry_13_ser_edge_mean_per_well	nonborder_nucleus_symmetry_13_ser_edge_mean_per_well	d	H2AX	nucleus	distribution	asymptote	asymptote	NA	baseline	baseline nucleus H2AX distribution
1007	1	pheno1	2	50.316681	7.487556758	49.616736	50.640741	d_nonborder_nucleus_symmetry_13_ser_hole_2_mean_per_well	nonborder_nucleus_symmetry_13_ser_hole_2_mean_per_well	d	Hoechst	nucleus	distribution	asymptote	asymptote	maximum response	maximum response	maximum response nucleus Hoechst distribution
1008	1	pheno1	16	28.04168	7.405949459	26.786079	28.451499	d_nonborder_nucleus_symmetry_13_ser_hole_mean_per_well	nonborder_nucleus_symmetry_13_ser_hole_mean_per_well	d	H2AX	nucleus	distribution	asymptote	asymptote	maximum response	maximum response	maximum response nucleus H2AX distribution
1009	1	pheno1	9	80.796973	5.814608215	42.535438	81.017486	d_nonborder_nucleus_symmetry_13_ser_ridge_2_mean_per_well	nonborder_nucleus_symmetry_13_ser_ridge_2_mean_per_well	d	Hoechst	nucleus	distribution	asymptote	asymptote	maximum response	maximum response	maximum response nucleus Hoechst distribution
1010	1	pheno1	10	73.375004	6.020973546	71.032775	73.516106	d_nonborder_nucleus_symmetry_13_ser_ridge_mean_per_well	nonborder_nucleus_symmetry_13_ser_ridge_mean_per_well	d	H2AX	nucleus	distribution	asymptote	asymptote	maximum response	maximum response	maximum response nucleus H2AX distribution
1011	1	pheno1	17	32.688003	6.538475421	31.816854	33.533376	d_nonborder_nucleus_symmetry_13_ser_saddle_2_mean_per_well	nonborder_nucleus_symmetry_13_ser_saddle_2_mean_per_well	d	Hoechst	nucleus	distribution	asymptote	asymptote	NA	baseline	baseline nucleus Hoechst distribution
1012	1	pheno1	X	129.634839	5.781903632	128.35728	166.287402	d_nonborder_nucleus_symmetry_13_ser_saddle_mean_per_well	nonborder_nucleus_symmetry_13_ser_saddle_mean_per_well	d	H2AX	nucleus	distribution	asymptote	asymptote	maximum response	maximum response	maximum response nucleus H2AX distribution
1013	1	pheno1	5	133.059615	6.465516614	81.738763	133.795446	d_nonborder_nucleus_symmetry_13_ser_spot_2_mean_per_well	nonborder_nucleus_symmetry_13_ser_spot_2_mean_per_well	d	Hoechst	nucleus	distribution	asymptote	asymptote	maximum response	maximum response	maximum response nucleus Hoechst distribution
1014	1	pheno1	1	153.811802	6.816093286	152.190106	154.037704	d_nonborder_nucleus_symmetry_13_ser_spot_mean_per_well	nonborder_nucleus_symmetry_13_ser_spot_mean_per_well	d	H2AX	nucleus	distribution	asymptote	asymptote	maximum response	maximum response	maximum response nucleus H2AX distribution
1015	1	pheno1	17	24.322255	5.452839522	4.071522	43.095729	d_nonborder_nucleus_symmetry_13_ser_valley_2_mean_per_well	nonborder_nucleus_symmetry_13_ser_valley_2_mean_per_well	d	Hoechst	nucleus	distribution	asymptote	asymptote	NA	baseline	baseline nucleus Hoechst distribution
1016	1	pheno1	15	25.916005	6.812358403	25.823832	26.93266	d_nonborder_nucleus_symmetry_13_ser_valley_mean_per_well	nonborder_nucleus_symmetry_13_ser_valley_mean_per_well	d	H2AX	nucleus	distribution	asymptote	asymptote	maximum response	maximum response	maximum response nucleus H2AX distribution
1017	1	pheno1	7	96.591268	8.147143039	96.149758	97.260868	d_nonborder_nucleus_symmetry_14_2_mean_per_well	nonborder_nucleus_symmetry_14_2_mean_per_well	d	Hoechst	nucleus	distribution	asymptote	asymptote	NA	baseline	baseline nucleus Hoechst distribution
1018	1	pheno1	2	34.992125	6.926443071	29.506173	37.123556	d_nonborder_nucleus_symmetry_14_mean_per_well	nonborder_nucleus_symmetry_14_mean_per_well	d	H2AX	nucleus	distribution	asymptote	asymptote	NA	baseline	baseline nucleus H2AX distribution
1019	1	pheno1	14	22.100927	6.492362105	21.243394	22.464191	d_nonborder_nucleus_symmetry_14_ser_bright_2_mean_per_well	nonborder_nucleus_symmetry_14_ser_bright_2_mean_per_well	d	Hoechst	nucleus	distribution	asymptote	asymptote	maximum response	maximum response	maximum response nucleus Hoechst distribution
1020	1	pheno1	10	100.641058	6.347664158	99.222443	101.639398	d_nonborder_nucleus_symmetry_14_ser_bright_mean_per_well	nonborder_nucleus_symmetry_14_ser_bright_mean_per_well	d	H2AX	nucleus	distribution	asymptote	asymptote	maximum response	maximum response	maximum response nucleus H2AX distribution
1021	1	pheno1	5	132.729238	6.716299297	126.581073	134.295424	d_nonborder_nucleus_symmetry_14_ser_dark_2_mean_per_well	nonborder_nucleus_symmetry_14_ser_dark_2_mean_per_well	d	Hoechst	nucleus	distribution	asymptote	asymptote	NA	baseline	baseline nucleus Hoechst distribution
1022	1	pheno1	12	88.745771	5.605343446	17.134801	88.904584	d_nonborder_nucleus_symmetry_14_ser_dark_mean_per_well	nonborder_nucleus_symmetry_14_ser_dark_mean_per_well	d	H2AX	nucleus	distribution	asymptote	asymptote	maximum response	maximum response	maximum response nucleus H2AX distribution
1023	1	pheno1	7	96.591268	9.135188646	96.149758	96.837106	d_nonborder_nucleus_symmetry_14_ser_edge_2_mean_per_well	nonborder_nucleus_symmetry_14_ser_edge_2_mean_per_well	d	Hoechst	nucleus	distribution	asymptote	asymptote	NA	baseline	baseline nucleus Hoechst distribution
1024	1	pheno1	7	96.65027	7.583179811	96.149758	96.870703	d_nonborder_nucleus_symmetry_14_ser_edge_mean_per_well	nonborder_nucleus_symmetry_14_ser_edge_mean_per_well	d	H2AX	nucleus	distribution	asymptote	asymptote	NA	baseline	baseline nucleus H2AX distribution
1025	1	pheno1	1	11.914562	7.048128669	6.192704	12.785941	d_nonborder_nucleus_symmetry_14_ser_hole_2_mean_per_well	nonborder_nucleus_symmetry_14_ser_hole_2_mean_per_well	d	Hoechst	nucleus	distribution	asymptote	asymptote	maximum response	maximum response	maximum response nucleus Hoechst distribution
1026	1	pheno1	2	78.896856	7.415645095	78.757549	78.945092	d_nonborder_nucleus_symmetry_14_ser_hole_mean_per_well	nonborder_nucleus_symmetry_14_ser_hole_mean_per_well	d	H2AX	nucleus	distribution	asymptote	asymptote	maximum response	maximum response	maximum response nucleus H2AX distribution
1027	1	pheno1	2	73.980846	5.888948914	4.886879	77.66521	d_nonborder_nucleus_symmetry_14_ser_ridge_2_mean_per_well	nonborder_nucleus_symmetry_14_ser_ridge_2_mean_per_well	d	Hoechst	nucleus	distribution	asymptote	asymptote	maximum response	maximum response	maximum response nucleus Hoechst distribution
1028	1	pheno1	X	142.284708	6.541389769	141.178958	142.691605	d_nonborder_nucleus_symmetry_14_ser_ridge_mean_per_well	nonborder_nucleus_symmetry_14_ser_ridge_mean_per_well	d	H2AX	nucleus	distribution	asymptote	asymptote	maximum response	maximum response	maximum response nucleus H2AX distribution
1029	1	pheno1	7	96.60941	7.504903975	96.149758	97.33691	d_nonborder_nucleus_symmetry_14_ser_saddle_2_mean_per_well	nonborder_nucleus_symmetry_14_ser_saddle_2_mean_per_well	d	Hoechst	nucleus	distribution	asymptote	asymptote	NA	baseline	baseline nucleus Hoechst distribution
1030	1	pheno1	2	33.728737	6.506500458	29.076993	41.050597	d_nonborder_nucleus_symmetry_14_ser_saddle_mean_per_well	nonborder_nucleus_symmetry_14_ser_saddle_mean_per_well	d	H2AX	nucleus	distribution	asymptote	asymptote	NA	baseline	baseline nucleus H2AX distribution
1031	1	pheno1	16	44.750096	6.831239203	44.680857	44.930254	d_nonborder_nucleus_symmetry_14_ser_spot_2_mean_per_well	nonborder_nucleus_symmetry_14_ser_spot_2_mean_per_well	d	Hoechst	nucleus	distribution	asymptote	asymptote	maximum response	maximum response	maximum response nucleus Hoechst distribution
1032	1	pheno1	2	128.427931	6.160150623	128.094487	128.630545	d_nonborder_nucleus_symmetry_14_ser_spot_mean_per_well	nonborder_nucleus_symmetry_14_ser_spot_mean_per_well	d	H2AX	nucleus	distribution	asymptote	asymptote	maximum response	maximum response	maximum response nucleus H2AX distribution
1033	1	pheno1	19	58.228092	6.408954862	58.204392	58.905269	d_nonborder_nucleus_symmetry_14_ser_valley_2_mean_per_well	nonborder_nucleus_symmetry_14_ser_valley_2_mean_per_well	d	Hoechst	nucleus	distribution	asymptote	asymptote	NA	baseline	baseline nucleus Hoechst distribution
1034	1	pheno1	19	58.435108	6.05787332	58.345461	58.544012	d_nonborder_nucleus_symmetry_14_ser_valley_mean_per_well	nonborder_nucleus_symmetry_14_ser_valley_mean_per_well	d	H2AX	nucleus	distribution	asymptote	asymptote	NA	baseline	baseline nucleus H2AX distribution
1035	1	pheno1	6	19.658047	7.330910865	16.056743	21.655196	d_nonborder_nucleus_symmetry_15_2_mean_per_well	nonborder_nucleus_symmetry_15_2_mean_per_well	d	Hoechst	nucleus	distribution	asymptote	asymptote	NA	baseline	baseline nucleus Hoechst distribution
1036	1	pheno1	17	52.166118	6.046630506	50.406913	52.267924	d_nonborder_nucleus_symmetry_15_mean_per_well	nonborder_nucleus_symmetry_15_mean_per_well	d	H2AX	nucleus	distribution	asymptote	asymptote	NA	baseline	baseline nucleus H2AX distribution
1037	1	pheno1	6	15.390764	6.768871231	15.200497	20.515684	d_nonborder_nucleus_symmetry_15_ser_bright_2_mean_per_well	nonborder_nucleus_symmetry_15_ser_bright_2_mean_per_well	d	Hoechst	nucleus	distribution	asymptote	asymptote	maximum response	maximum response	maximum response nucleus Hoechst distribution
1038	1	pheno1	3	133.303498	5.767935178	132.540441	135.517974	d_nonborder_nucleus_symmetry_15_ser_bright_mean_per_well	nonborder_nucleus_symmetry_15_ser_bright_mean_per_well	d	H2AX	nucleus	distribution	asymptote	asymptote	maximum response	maximum response	maximum response nucleus H2AX distribution
1039	1	pheno1	14	113.133652	5.869709256	112.718584	114.867394	d_nonborder_nucleus_symmetry_15_ser_dark_2_mean_per_well	nonborder_nucleus_symmetry_15_ser_dark_2_mean_per_well	d	Hoechst	nucleus	distribution	asymptote	asymptote	maximum response	maximum response	maximum response nucleus Hoechst distribution
1040	1	pheno1	14	14.223363	5.821207287	8.249135	73.465578	d_nonborder_nucleus_symmetry_15_ser_dark_mean_per_well	nonborder_nucleus_symmetry_15_ser_dark_mean_per_well	d	H2AX	nucleus	distribution	asymptote	asymptote	maximum response	maximum response	maximum response nucleus H2AX distribution
1041	1	pheno1	16	39.614006	6.497226804	36.995894	40.414188	d_nonborder_nucleus_symmetry_15_ser_edge_2_mean_per_well	nonborder_nucleus_symmetry_15_ser_edge_2_mean_per_well	d	Hoechst	nucleus	distribution	asymptote	asymptote	NA	baseline	baseline nucleus Hoechst distribution
1042	1	pheno1	12	29.698331	6.16637015	27.869687	30.326131	d_nonborder_nucleus_symmetry_15_ser_edge_mean_per_well	nonborder_nucleus_symmetry_15_ser_edge_mean_per_well	d	H2AX	nucleus	distribution	asymptote	asymptote	NA	baseline	baseline nucleus H2AX distribution
1043	1	pheno1	6	18.441565	6.809922952	17.553096	19.935016	d_nonborder_nucleus_symmetry_15_ser_hole_2_mean_per_well	nonborder_nucleus_symmetry_15_ser_hole_2_mean_per_well	d	Hoechst	nucleus	distribution	asymptote	asymptote	maximum response	maximum response	maximum response nucleus Hoechst distribution
1044	1	pheno1	16	28.271448	6.392415439	23.448125	31.03156	d_nonborder_nucleus_symmetry_15_ser_hole_mean_per_well	nonborder_nucleus_symmetry_15_ser_hole_mean_per_well	d	H2AX	nucleus	distribution	asymptote	asymptote	maximum response	maximum response	maximum response nucleus H2AX distribution
1045	1	pheno1	6	15.791252	6.211195587	14.172758	16.328152	d_nonborder_nucleus_symmetry_15_ser_ridge_2_mean_per_well	nonborder_nucleus_symmetry_15_ser_ridge_2_mean_per_well	d	Hoechst	nucleus	distribution	asymptote	asymptote	maximum response	maximum response	maximum response nucleus Hoechst distribution
1046	1	pheno1	1	187.618752	6.519589561	187.463427	188.288905	d_nonborder_nucleus_symmetry_15_ser_ridge_mean_per_well	nonborder_nucleus_symmetry_15_ser_ridge_mean_per_well	d	H2AX	nucleus	distribution	asymptote	asymptote	maximum response	maximum response	maximum response nucleus H2AX distribution
1047	1	pheno1	7	96.660896	7.238308245	95.958777	100.08108	d_nonborder_nucleus_symmetry_15_ser_saddle_2_mean_per_well	nonborder_nucleus_symmetry_15_ser_saddle_2_mean_per_well	d	Hoechst	nucleus	distribution	asymptote	asymptote	NA	baseline	baseline nucleus Hoechst distribution
1048	1	pheno1	7	25.023279	6.205801827	24.783631	29.508162	d_nonborder_nucleus_symmetry_15_ser_saddle_mean_per_well	nonborder_nucleus_symmetry_15_ser_saddle_mean_per_well	d	H2AX	nucleus	distribution	asymptote	asymptote	maximum response	maximum response	maximum response nucleus H2AX distribution
1049	1	pheno1	18	54.072739	6.400838332	53.282406	60.591509	d_nonborder_nucleus_symmetry_15_ser_spot_2_mean_per_well	nonborder_nucleus_symmetry_15_ser_spot_2_mean_per_well	d	Hoechst	nucleus	distribution	asymptote	asymptote	NA	baseline	baseline nucleus Hoechst distribution
1050	1	pheno1	4	23.03901	6.092867661	22.262304	140.568293	d_nonborder_nucleus_symmetry_15_ser_spot_mean_per_well	nonborder_nucleus_symmetry_15_ser_spot_mean_per_well	d	H2AX	nucleus	distribution	asymptote	asymptote	maximum response	maximum response	maximum response nucleus H2AX distribution
1051	1	pheno1	1	37.117364	6.249443284	36.500555	154.236997	d_nonborder_nucleus_symmetry_15_ser_valley_2_mean_per_well	nonborder_nucleus_symmetry_15_ser_valley_2_mean_per_well	d	Hoechst	nucleus	distribution	asymptote	asymptote	NA	baseline	baseline nucleus Hoechst distribution
1052	1	pheno1	1	8.959175	6.53379324	6.192704	12.729603	d_nonborder_nucleus_symmetry_15_ser_valley_mean_per_well	nonborder_nucleus_symmetry_15_ser_valley_mean_per_well	d	H2AX	nucleus	distribution	asymptote	asymptote	maximum response	maximum response	maximum response nucleus H2AX distribution
1053	1	pheno1	1	190.430553	6.855073834	189.827992	191.318844	d_nonborder_nucleus_threshold_compactness_30_percent_2_mean_per_well	nonborder_nucleus_threshold_compactness_30_percent_2_mean_per_well	d	Hoechst	nucleus	compactness	asymptote	asymptote	maximum response	maximum response	maximum response nucleus Hoechst compactness
1054	1	pheno1	7	114.332111	6.192879579	87.226764	114.813241	d_nonborder_nucleus_threshold_compactness_30_percent_mean_per_well	nonborder_nucleus_threshold_compactness_30_percent_mean_per_well	d	H2AX	nucleus	compactness	asymptote	asymptote	maximum response	maximum response	maximum response nucleus H2AX compactness
1055	1	pheno1	12	28.414992	5.799997012	27.605102	44.613409	d_nonborder_nucleus_threshold_compactness_30_percent_ser_bright_2_mean_per_well	nonborder_nucleus_threshold_compactness_30_percent_ser_bright_2_mean_per_well	d	Hoechst	nucleus	compactness	asymptote	asymptote	maximum response	maximum response	maximum response nucleus Hoechst compactness
1056	1	pheno1	13	107.245557	6.762685414	106.018932	107.565255	d_nonborder_nucleus_threshold_compactness_30_percent_ser_bright_mean_per_well	nonborder_nucleus_threshold_compactness_30_percent_ser_bright_mean_per_well	d	H2AX	nucleus	compactness	asymptote	asymptote	maximum response	maximum response	maximum response nucleus H2AX compactness
1057	1	pheno1	1	44.122232	8.255716681	43.685248	45.310196	d_nonborder_nucleus_threshold_compactness_30_percent_ser_dark_2_mean_per_well	nonborder_nucleus_threshold_compactness_30_percent_ser_dark_2_mean_per_well	d	Hoechst	nucleus	compactness	asymptote	asymptote	maximum response	maximum response	maximum response nucleus Hoechst compactness
1058	1	pheno1	1	11.068783	6.891191391	3.668399	191.318844	d_nonborder_nucleus_threshold_compactness_30_percent_ser_dark_mean_per_well	nonborder_nucleus_threshold_compactness_30_percent_ser_dark_mean_per_well	d	H2AX	nucleus	compactness	asymptote	asymptote	maximum response	maximum response	maximum response nucleus H2AX compactness
1059	1	pheno1	10	120.612317	6.815378344	119.552293	121.639039	d_nonborder_nucleus_threshold_compactness_30_percent_ser_edge_2_mean_per_well	nonborder_nucleus_threshold_compactness_30_percent_ser_edge_2_mean_per_well	d	Hoechst	nucleus	compactness	asymptote	asymptote	maximum response	maximum response	maximum response nucleus Hoechst compactness
1060	1	pheno1	16	30.64183	6.665924608	27.928731	73.052945	d_nonborder_nucleus_threshold_compactness_30_percent_ser_edge_mean_per_well	nonborder_nucleus_threshold_compactness_30_percent_ser_edge_mean_per_well	d	H2AX	nucleus	compactness	asymptote	asymptote	maximum response	maximum response	maximum response nucleus H2AX compactness
1061	1	pheno1	2	50.281708	7.43866398	49.872354	50.640741	d_nonborder_nucleus_threshold_compactness_30_percent_ser_hole_2_mean_per_well	nonborder_nucleus_threshold_compactness_30_percent_ser_hole_2_mean_per_well	d	Hoechst	nucleus	compactness	asymptote	asymptote	maximum response	maximum response	maximum response nucleus Hoechst compactness
1062	1	pheno1	1	11.914562	6.900928015	7.313436	24.9152	d_nonborder_nucleus_threshold_compactness_30_percent_ser_hole_mean_per_well	nonborder_nucleus_threshold_compactness_30_percent_ser_hole_mean_per_well	d	H2AX	nucleus	compactness	asymptote	asymptote	maximum response	maximum response	maximum response nucleus H2AX compactness
1063	1	pheno1	14	76.424154	6.436789103	75.63818	77.755665	d_nonborder_nucleus_threshold_compactness_30_percent_ser_ridge_2_mean_per_well	nonborder_nucleus_threshold_compactness_30_percent_ser_ridge_2_mean_per_well	d	Hoechst	nucleus	compactness	asymptote	asymptote	maximum response	maximum response	maximum response nucleus Hoechst compactness
1064	1	pheno1	7	90.041534	7.374496568	89.968638	99.903369	d_nonborder_nucleus_threshold_compactness_30_percent_ser_ridge_mean_per_well	nonborder_nucleus_threshold_compactness_30_percent_ser_ridge_mean_per_well	d	H2AX	nucleus	compactness	asymptote	asymptote	maximum response	maximum response	maximum response nucleus H2AX compactness
1065	1	pheno1	14	76.398053	8.640565448	75.681737	76.577834	d_nonborder_nucleus_threshold_compactness_30_percent_ser_saddle_2_mean_per_well	nonborder_nucleus_threshold_compactness_30_percent_ser_saddle_2_mean_per_well	d	Hoechst	nucleus	compactness	asymptote	asymptote	maximum response	maximum response	maximum response nucleus Hoechst compactness
1066	1	pheno1	12	28.41831	6.616007069	27.86021	28.552324	d_nonborder_nucleus_threshold_compactness_30_percent_ser_saddle_mean_per_well	nonborder_nucleus_threshold_compactness_30_percent_ser_saddle_mean_per_well	d	H2AX	nucleus	compactness	asymptote	asymptote	maximum response	maximum response	maximum response nucleus H2AX compactness
1067	1	pheno1	14	75.739446	6.177671908	75.681737	77.755665	d_nonborder_nucleus_threshold_compactness_30_percent_ser_spot_2_mean_per_well	nonborder_nucleus_threshold_compactness_30_percent_ser_spot_2_mean_per_well	d	Hoechst	nucleus	compactness	asymptote	asymptote	maximum response	maximum response	maximum response nucleus Hoechst compactness
1068	1	pheno1	18	77.607425	6.551626578	56.254299	78.230281	d_nonborder_nucleus_threshold_compactness_30_percent_ser_spot_mean_per_well	nonborder_nucleus_threshold_compactness_30_percent_ser_spot_mean_per_well	d	H2AX	nucleus	compactness	asymptote	asymptote	maximum response	maximum response	maximum response nucleus H2AX compactness
1069	1	pheno1	1	44.122232	6.972364714	43.15686	171.163417	d_nonborder_nucleus_threshold_compactness_30_percent_ser_valley_2_mean_per_well	nonborder_nucleus_threshold_compactness_30_percent_ser_valley_2_mean_per_well	d	Hoechst	nucleus	compactness	asymptote	asymptote	maximum response	maximum response	maximum response nucleus Hoechst compactness
1070	1	pheno1	1	44.122232	8.544175168	43.174808	45.310196	d_nonborder_nucleus_threshold_compactness_30_percent_ser_valley_mean_per_well	nonborder_nucleus_threshold_compactness_30_percent_ser_valley_mean_per_well	d	H2AX	nucleus	compactness	asymptote	asymptote	maximum response	maximum response	maximum response nucleus H2AX compactness
1071	1	pheno1	1	190.592944	6.295065594	11.914562	191.268134	d_nonborder_nucleus_threshold_compactness_40_percent_2_mean_per_well	nonborder_nucleus_threshold_compactness_40_percent_2_mean_per_well	d	Hoechst	nucleus	compactness	asymptote	asymptote	maximum response	maximum response	maximum response nucleus Hoechst compactness
1072	1	pheno1	12	28.41831	7.601766845	28.370451	28.552324	d_nonborder_nucleus_threshold_compactness_40_percent_mean_per_well	nonborder_nucleus_threshold_compactness_40_percent_mean_per_well	d	H2AX	nucleus	compactness	asymptote	asymptote	maximum response	maximum response	maximum response nucleus H2AX compactness
1073	1	pheno1	18	31.789768	5.810897992	5.474071	73.967036	d_nonborder_nucleus_threshold_compactness_40_percent_ser_bright_2_mean_per_well	nonborder_nucleus_threshold_compactness_40_percent_ser_bright_2_mean_per_well	d	Hoechst	nucleus	compactness	asymptote	asymptote	maximum response	maximum response	maximum response nucleus Hoechst compactness
1074	1	pheno1	1	136.558793	6.26118487	21.351467	137.638703	d_nonborder_nucleus_threshold_compactness_40_percent_ser_bright_mean_per_well	nonborder_nucleus_threshold_compactness_40_percent_ser_bright_mean_per_well	d	H2AX	nucleus	compactness	asymptote	asymptote	maximum response	maximum response	maximum response nucleus H2AX compactness
1075	1	pheno1	1	44.122232	8.319185824	43.685248	45.310196	d_nonborder_nucleus_threshold_compactness_40_percent_ser_dark_2_mean_per_well	nonborder_nucleus_threshold_compactness_40_percent_ser_dark_2_mean_per_well	d	Hoechst	nucleus	compactness	asymptote	asymptote	maximum response	maximum response	maximum response nucleus Hoechst compactness
1076	1	pheno1	14	76.161317	6.170407311	12.324752	77.755665	d_nonborder_nucleus_threshold_compactness_40_percent_ser_dark_mean_per_well	nonborder_nucleus_threshold_compactness_40_percent_ser_dark_mean_per_well	d	H2AX	nucleus	compactness	asymptote	asymptote	maximum response	maximum response	maximum response nucleus H2AX compactness
1077	1	pheno1	1	185.618243	6.295914324	184.237008	185.688601	d_nonborder_nucleus_threshold_compactness_40_percent_ser_edge_2_mean_per_well	nonborder_nucleus_threshold_compactness_40_percent_ser_edge_2_mean_per_well	d	Hoechst	nucleus	compactness	asymptote	asymptote	maximum response	maximum response	maximum response nucleus Hoechst compactness
1078	1	pheno1	7	99.623552	7.293155169	97.491813	103.662313	d_nonborder_nucleus_threshold_compactness_40_percent_ser_edge_mean_per_well	nonborder_nucleus_threshold_compactness_40_percent_ser_edge_mean_per_well	d	H2AX	nucleus	compactness	asymptote	asymptote	maximum response	maximum response	maximum response nucleus H2AX compactness
1079	1	pheno1	2	50.316681	7.355285604	49.711871	50.640741	d_nonborder_nucleus_threshold_compactness_40_percent_ser_hole_2_mean_per_well	nonborder_nucleus_threshold_compactness_40_percent_ser_hole_2_mean_per_well	d	Hoechst	nucleus	compactness	asymptote	asymptote	maximum response	maximum response	maximum response nucleus Hoechst compactness
1080	1	pheno1	8	48.899427	6.252373208	24.20774	57.904847	d_nonborder_nucleus_threshold_compactness_40_percent_ser_hole_mean_per_well	nonborder_nucleus_threshold_compactness_40_percent_ser_hole_mean_per_well	d	H2AX	nucleus	compactness	asymptote	asymptote	maximum response	maximum response	maximum response nucleus H2AX compactness
1081	1	pheno1	18	31.437791	6.114408048	27.676875	55.448322	d_nonborder_nucleus_threshold_compactness_40_percent_ser_ridge_2_mean_per_well	nonborder_nucleus_threshold_compactness_40_percent_ser_ridge_2_mean_per_well	d	Hoechst	nucleus	compactness	asymptote	asymptote	maximum response	maximum response	maximum response nucleus Hoechst compactness
1082	1	pheno1	2	170.668361	6.949001179	78.354337	171.636277	d_nonborder_nucleus_threshold_compactness_40_percent_ser_ridge_mean_per_well	nonborder_nucleus_threshold_compactness_40_percent_ser_ridge_mean_per_well	d	H2AX	nucleus	compactness	asymptote	asymptote	maximum response	maximum response	maximum response nucleus H2AX compactness
1083	1	pheno1	14	76.792363	5.775961063	10.80151	77.18906	d_nonborder_nucleus_threshold_compactness_40_percent_ser_saddle_2_mean_per_well	nonborder_nucleus_threshold_compactness_40_percent_ser_saddle_2_mean_per_well	d	Hoechst	nucleus	compactness	asymptote	asymptote	maximum response	maximum response	maximum response nucleus Hoechst compactness
1084	1	pheno1	1	162.594102	6.496800901	43.549304	162.618892	d_nonborder_nucleus_threshold_compactness_40_percent_ser_saddle_mean_per_well	nonborder_nucleus_threshold_compactness_40_percent_ser_saddle_mean_per_well	d	H2AX	nucleus	compactness	asymptote	asymptote	maximum response	maximum response	maximum response nucleus H2AX compactness
1085	1	pheno1	14	77.254017	6.571830423	75.681737	83.042349	d_nonborder_nucleus_threshold_compactness_40_percent_ser_spot_2_mean_per_well	nonborder_nucleus_threshold_compactness_40_percent_ser_spot_2_mean_per_well	d	Hoechst	nucleus	compactness	asymptote	asymptote	maximum response	maximum response	maximum response nucleus Hoechst compactness
1086	1	pheno1	1	62.786237	5.856480612	62.139928	188.800968	d_nonborder_nucleus_threshold_compactness_40_percent_ser_spot_mean_per_well	nonborder_nucleus_threshold_compactness_40_percent_ser_spot_mean_per_well	d	H2AX	nucleus	compactness	asymptote	asymptote	maximum response	maximum response	maximum response nucleus H2AX compactness
1087	1	pheno1	1	43.685711	6.792967316	43.15686	44.411436	d_nonborder_nucleus_threshold_compactness_40_percent_ser_valley_2_mean_per_well	nonborder_nucleus_threshold_compactness_40_percent_ser_valley_2_mean_per_well	d	Hoechst	nucleus	compactness	asymptote	asymptote	maximum response	maximum response	maximum response nucleus Hoechst compactness
1088	1	pheno1	1	43.649532	8.731423317	43.15686	44.575091	d_nonborder_nucleus_threshold_compactness_40_percent_ser_valley_mean_per_well	nonborder_nucleus_threshold_compactness_40_percent_ser_valley_mean_per_well	d	H2AX	nucleus	compactness	asymptote	asymptote	maximum response	maximum response	maximum response nucleus H2AX compactness
1089	1	pheno1	1	189.830335	6.871277922	155.834122	190.70908	d_nonborder_nucleus_threshold_compactness_50_percent_2_mean_per_well	nonborder_nucleus_threshold_compactness_50_percent_2_mean_per_well	d	Hoechst	nucleus	compactness	asymptote	asymptote	maximum response	maximum response	maximum response nucleus Hoechst compactness
1090	1	pheno1	12	28.414992	7.999843395	28.370451	28.542453	d_nonborder_nucleus_threshold_compactness_50_percent_mean_per_well	nonborder_nucleus_threshold_compactness_50_percent_mean_per_well	d	H2AX	nucleus	compactness	asymptote	asymptote	maximum response	maximum response	maximum response nucleus H2AX compactness
1091	1	pheno1	4	49.03716	6.528980971	47.75575	125.33882	d_nonborder_nucleus_threshold_compactness_50_percent_ser_bright_2_mean_per_well	nonborder_nucleus_threshold_compactness_50_percent_ser_bright_2_mean_per_well	d	Hoechst	nucleus	compactness	asymptote	asymptote	maximum response	maximum response	maximum response nucleus Hoechst compactness
1092	1	pheno1	1	40.931804	8.140815667	40.708716	41.135044	d_nonborder_nucleus_threshold_compactness_50_percent_ser_bright_mean_per_well	nonborder_nucleus_threshold_compactness_50_percent_ser_bright_mean_per_well	d	H2AX	nucleus	compactness	asymptote	asymptote	maximum response	maximum response	maximum response nucleus H2AX compactness
1093	1	pheno1	2	78.358533	7.718570527	78.35151	78.375318	d_nonborder_nucleus_threshold_compactness_50_percent_ser_dark_2_mean_per_well	nonborder_nucleus_threshold_compactness_50_percent_ser_dark_2_mean_per_well	d	Hoechst	nucleus	compactness	asymptote	asymptote	maximum response	maximum response	maximum response nucleus Hoechst compactness
1094	1	pheno1	14	80.196839	6.395335508	76.919538	99.740679	d_nonborder_nucleus_threshold_compactness_50_percent_ser_dark_mean_per_well	nonborder_nucleus_threshold_compactness_50_percent_ser_dark_mean_per_well	d	H2AX	nucleus	compactness	asymptote	asymptote	maximum response	maximum response	maximum response nucleus H2AX compactness
1095	1	pheno1	1	184.618209	5.844480741	14.726005	185.767821	d_nonborder_nucleus_threshold_compactness_50_percent_ser_edge_2_mean_per_well	nonborder_nucleus_threshold_compactness_50_percent_ser_edge_2_mean_per_well	d	Hoechst	nucleus	compactness	asymptote	asymptote	maximum response	maximum response	maximum response nucleus Hoechst compactness
1096	1	pheno1	9	111.784422	7.100925008	111.546202	111.904045	d_nonborder_nucleus_threshold_compactness_50_percent_ser_edge_mean_per_well	nonborder_nucleus_threshold_compactness_50_percent_ser_edge_mean_per_well	d	H2AX	nucleus	compactness	asymptote	asymptote	maximum response	maximum response	maximum response nucleus H2AX compactness
1097	1	pheno1	2	50.276496	6.901572794	49.616736	50.649069	d_nonborder_nucleus_threshold_compactness_50_percent_ser_hole_2_mean_per_well	nonborder_nucleus_threshold_compactness_50_percent_ser_hole_2_mean_per_well	d	Hoechst	nucleus	compactness	asymptote	asymptote	maximum response	maximum response	maximum response nucleus Hoechst compactness
1098	1	pheno1	8	39.705621	7.763947221	36.787985	49.236927	d_nonborder_nucleus_threshold_compactness_50_percent_ser_hole_mean_per_well	nonborder_nucleus_threshold_compactness_50_percent_ser_hole_mean_per_well	d	H2AX	nucleus	compactness	asymptote	asymptote	maximum response	maximum response	maximum response nucleus H2AX compactness
1099	1	pheno1	4	79.404141	6.809035659	78.257398	80.754521	d_nonborder_nucleus_threshold_compactness_50_percent_ser_ridge_2_mean_per_well	nonborder_nucleus_threshold_compactness_50_percent_ser_ridge_2_mean_per_well	d	Hoechst	nucleus	compactness	asymptote	asymptote	maximum response	maximum response	maximum response nucleus Hoechst compactness
1100	1	pheno1	19	6.678438	6.611030982	6.386046	58.16158	d_nonborder_nucleus_threshold_compactness_50_percent_ser_ridge_mean_per_well	nonborder_nucleus_threshold_compactness_50_percent_ser_ridge_mean_per_well	d	H2AX	nucleus	compactness	asymptote	asymptote	maximum response	maximum response	maximum response nucleus H2AX compactness
1101	1	pheno1	12	32.740768	5.597712818	31.484238	106.886309	d_nonborder_nucleus_threshold_compactness_50_percent_ser_saddle_2_mean_per_well	nonborder_nucleus_threshold_compactness_50_percent_ser_saddle_2_mean_per_well	d	Hoechst	nucleus	compactness	asymptote	asymptote	maximum response	maximum response	maximum response nucleus Hoechst compactness
1102	1	pheno1	19	26.370839	5.507492964	25.654273	28.816833	d_nonborder_nucleus_threshold_compactness_50_percent_ser_saddle_mean_per_well	nonborder_nucleus_threshold_compactness_50_percent_ser_saddle_mean_per_well	d	H2AX	nucleus	compactness	asymptote	asymptote	maximum response	maximum response	maximum response nucleus H2AX compactness
1103	1	pheno1	14	81.47062	6.634685323	73.032467	83.321372	d_nonborder_nucleus_threshold_compactness_50_percent_ser_spot_2_mean_per_well	nonborder_nucleus_threshold_compactness_50_percent_ser_spot_2_mean_per_well	d	Hoechst	nucleus	compactness	asymptote	asymptote	maximum response	maximum response	maximum response nucleus Hoechst compactness
1104	1	pheno1	2	50.740202	7.515096526	50.640741	50.74501	d_nonborder_nucleus_threshold_compactness_50_percent_ser_spot_mean_per_well	nonborder_nucleus_threshold_compactness_50_percent_ser_spot_mean_per_well	d	H2AX	nucleus	compactness	asymptote	asymptote	maximum response	maximum response	maximum response nucleus H2AX compactness
1105	1	pheno1	1	44.178285	7.068739316	43.154671	44.8671	d_nonborder_nucleus_threshold_compactness_50_percent_ser_valley_2_mean_per_well	nonborder_nucleus_threshold_compactness_50_percent_ser_valley_2_mean_per_well	d	Hoechst	nucleus	compactness	asymptote	asymptote	maximum response	maximum response	maximum response nucleus Hoechst compactness
1106	1	pheno1	2	128.131278	6.446796895	78.354337	181.194407	d_nonborder_nucleus_threshold_compactness_50_percent_ser_valley_mean_per_well	nonborder_nucleus_threshold_compactness_50_percent_ser_valley_mean_per_well	d	H2AX	nucleus	compactness	asymptote	asymptote	maximum response	maximum response	maximum response nucleus H2AX compactness
1107	1	pheno1	7	99.44858	7.171602737	98.690574	103.662313	d_nonborder_nucleus_threshold_compactness_60_percent_2_mean_per_well	nonborder_nucleus_threshold_compactness_60_percent_2_mean_per_well	d	Hoechst	nucleus	compactness	asymptote	asymptote	maximum response	maximum response	maximum response nucleus Hoechst compactness
1108	1	pheno1	14	99.309381	6.629483012	96.906684	99.606996	d_nonborder_nucleus_threshold_compactness_60_percent_mean_per_well	nonborder_nucleus_threshold_compactness_60_percent_mean_per_well	d	H2AX	nucleus	compactness	asymptote	asymptote	maximum response	maximum response	maximum response nucleus H2AX compactness
1109	1	pheno1	4	90.366907	7.136421302	89.527548	90.792397	d_nonborder_nucleus_threshold_compactness_60_percent_ser_bright_2_mean_per_well	nonborder_nucleus_threshold_compactness_60_percent_ser_bright_2_mean_per_well	d	Hoechst	nucleus	compactness	asymptote	asymptote	maximum response	maximum response	maximum response nucleus Hoechst compactness
1110	1	pheno1	13	62.852311	6.118036186	60.185807	63.017867	d_nonborder_nucleus_threshold_compactness_60_percent_ser_bright_mean_per_well	nonborder_nucleus_threshold_compactness_60_percent_ser_bright_mean_per_well	d	H2AX	nucleus	compactness	asymptote	asymptote	NA	baseline	baseline nucleus H2AX compactness
1111	1	pheno1	1	43.685711	7.758734388	43.15686	191.253212	d_nonborder_nucleus_threshold_compactness_60_percent_ser_dark_2_mean_per_well	nonborder_nucleus_threshold_compactness_60_percent_ser_dark_2_mean_per_well	d	Hoechst	nucleus	compactness	asymptote	asymptote	maximum response	maximum response	maximum response nucleus Hoechst compactness
1112	1	pheno1	14	76.602317	5.830149323	75.681737	99.740679	d_nonborder_nucleus_threshold_compactness_60_percent_ser_dark_mean_per_well	nonborder_nucleus_threshold_compactness_60_percent_ser_dark_mean_per_well	d	H2AX	nucleus	compactness	asymptote	asymptote	maximum response	maximum response	maximum response nucleus H2AX compactness
1113	1	pheno1	18	9.487195	6.289549145	5.463634	12.77348	d_nonborder_nucleus_threshold_compactness_60_percent_ser_edge_2_mean_per_well	nonborder_nucleus_threshold_compactness_60_percent_ser_edge_2_mean_per_well	d	Hoechst	nucleus	compactness	asymptote	asymptote	maximum response	maximum response	maximum response nucleus Hoechst compactness
1114	1	pheno1	17	9.230486	6.308925129	6.835921	10.739817	d_nonborder_nucleus_threshold_compactness_60_percent_ser_edge_mean_per_well	nonborder_nucleus_threshold_compactness_60_percent_ser_edge_mean_per_well	d	H2AX	nucleus	compactness	asymptote	asymptote	maximum response	maximum response	maximum response nucleus H2AX compactness
1115	1	pheno1	1	67.928758	6.482137211	14.228869	68.143786	d_nonborder_nucleus_threshold_compactness_60_percent_ser_hole_2_mean_per_well	nonborder_nucleus_threshold_compactness_60_percent_ser_hole_2_mean_per_well	d	Hoechst	nucleus	compactness	asymptote	asymptote	maximum response	maximum response	maximum response nucleus Hoechst compactness
1116	1	pheno1	2	78.358533	6.638169142	78.35151	79.677664	d_nonborder_nucleus_threshold_compactness_60_percent_ser_hole_mean_per_well	nonborder_nucleus_threshold_compactness_60_percent_ser_hole_mean_per_well	d	H2AX	nucleus	compactness	asymptote	asymptote	maximum response	maximum response	maximum response nucleus H2AX compactness
1117	1	pheno1	1	8.55413	8.700890519	3.010274	10.168674	d_nonborder_nucleus_threshold_compactness_60_percent_ser_ridge_2_mean_per_well	nonborder_nucleus_threshold_compactness_60_percent_ser_ridge_2_mean_per_well	d	Hoechst	nucleus	compactness	asymptote	asymptote	maximum response	maximum response	maximum response nucleus Hoechst compactness
1118	1	pheno1	11	95.246632	6.907779791	95.022349	95.29085	d_nonborder_nucleus_threshold_compactness_60_percent_ser_ridge_mean_per_well	nonborder_nucleus_threshold_compactness_60_percent_ser_ridge_mean_per_well	d	H2AX	nucleus	compactness	asymptote	asymptote	maximum response	maximum response	maximum response nucleus H2AX compactness
1119	1	pheno1	12	36.007555	6.714692885	32.508322	36.14215	d_nonborder_nucleus_threshold_compactness_60_percent_ser_saddle_2_mean_per_well	nonborder_nucleus_threshold_compactness_60_percent_ser_saddle_2_mean_per_well	d	Hoechst	nucleus	compactness	asymptote	asymptote	maximum response	maximum response	maximum response nucleus Hoechst compactness
1120	1	pheno1	15	39.939395	5.712140352	36.146537	102.340275	d_nonborder_nucleus_threshold_compactness_60_percent_ser_saddle_mean_per_well	nonborder_nucleus_threshold_compactness_60_percent_ser_saddle_mean_per_well	d	H2AX	nucleus	compactness	asymptote	asymptote	maximum response	maximum response	maximum response nucleus H2AX compactness
1121	1	pheno1	3	52.26996	5.497319247	51.738271	52.89075	d_nonborder_nucleus_threshold_compactness_60_percent_ser_spot_2_mean_per_well	nonborder_nucleus_threshold_compactness_60_percent_ser_spot_2_mean_per_well	d	Hoechst	nucleus	compactness	asymptote	asymptote	maximum response	maximum response	maximum response nucleus Hoechst compactness
1122	1	pheno1	1	43.174808	6.673453455	42.827586	191.268134	d_nonborder_nucleus_threshold_compactness_60_percent_ser_valley_2_mean_per_well	nonborder_nucleus_threshold_compactness_60_percent_ser_valley_2_mean_per_well	d	Hoechst	nucleus	compactness	asymptote	asymptote	maximum response	maximum response	maximum response nucleus Hoechst compactness
1123	1	pheno1	X	115.408092	5.923063006	108.247478	129.911674	d_nonborder_nucleus_threshold_compactness_60_percent_ser_valley_mean_per_well	nonborder_nucleus_threshold_compactness_60_percent_ser_valley_mean_per_well	d	H2AX	nucleus	compactness	asymptote	asymptote	maximum response	maximum response	maximum response nucleus H2AX compactness
1124	1	pheno1	18	11.986717	7.536530416	5.459112	12.387209	d_nonborder_nucleus_width_mm_mean_per_well	nonborder_nucleus_width_mm_mean_per_well	d	Hoechst	nucleus	size	asymptote	asymptote	NA	baseline	baseline nucleus Hoechst size
1125	1	pheno1	12	109.165141	7.338175897	33.946849	109.719427	d_nonborder_number_of_objects	nonborder_number_of_objects	d	H2AX	nucleus	count	asymptote	asymptote	NA	baseline	baseline nucleus H2AX count
1126	1	pheno1	2	28.69597	6.308062754	19.862924	35.641035	d_nonborder_relative_spot_intensity_mean_per_well	nonborder_relative_spot_intensity_mean_per_well	d	H2AX	nucleus	intensity	asymptote	asymptote	NA	baseline	baseline nucleus H2AX intensity
1127	1	pheno1	14	118.067466	7.350052953	117.746803	118.597963	d_nuclei_number_of_objects	nuclei_number_of_objects	d	H2AX	nucleus	count	asymptote	asymptote	NA	baseline	baseline nucleus H2AX count
1128	1	pheno1	7	97.441711	8.773167024	96.094318	98.545246	d_spots_sliding_parabola_selected_corrected_spot_intensity_min_per_well	spots_sliding_parabola_selected_corrected_spot_intensity_min_per_well	d	H2AX	nucleus	DNA damage	asymptote	asymptote	maximum response	maximum response	maximum response nucleus H2AX DNA damage
1129	1	pheno1	11	114.591795	7.664254853	113.896285	115.116662	d_spots_sliding_parabola_selected_number_of_spots_mean_per_nucleus_max_per_well	spots_sliding_parabola_selected_number_of_spots_mean_per_nucleus_max_per_well	d	H2AX	nucleus	DNA damage	asymptote	asymptote	NA	baseline	baseline nucleus H2AX DNA damage
1130	1	pheno1	6	115.969607	6.065332017	98.5868	116.864849	d_spots_sliding_parabola_selected_relative_spot_intensity_mean_per_nucleus_median_per_well	spots_sliding_parabola_selected_relative_spot_intensity_mean_per_nucleus_median_per_well	d	H2AX	nucleus	DNA damage	asymptote	asymptote	NA	baseline	baseline nucleus H2AX DNA damage
1131	1	pheno1	12	12.810107	7.716313202	12.591414	15.756951	d_spots_sliding_parabola_selected_uncorrected_spot_peak_intensity_max_per_well	spots_sliding_parabola_selected_uncorrected_spot_peak_intensity_max_per_well	d	H2AX	nucleus	DNA damage	asymptote	asymptote	NA	baseline	baseline nucleus H2AX DNA damage
1132	1	pheno1	2	93.522967	7.173880733	85.529067	93.74968	EC05_nonborder_cell_3_area_mm2_mean_per_well	nonborder_cell_3_area_mm2_mean_per_well	EC05	MitoTracker	cell	size	EC	EC05	NA	EC05	EC05 cell MitoTracker size
1133	1	pheno1	6	56.23796	6.599974508	55.431823	60.370109	EC05_nonborder_cell_3_roundness_mean_per_well	nonborder_cell_3_roundness_mean_per_well	EC05	MitoTracker	cell	shape	EC	EC05	NA	EC05	EC05 cell MitoTracker shape
1134	1	pheno1	X	10.095861	7.854178135	8.194596	10.613096	EC05_nonborder_cell_mito_tracker_deep_red_ser_bright_1_5_px_mean_per_well	nonborder_cell_mito_tracker_deep_red_ser_bright_1_5_px_mean_per_well	EC05	MitoTracker	mitochondria	texture	EC	EC05	NA	EC05	EC05 mitochondria MitoTracker texture
1135	1	pheno1	15	18.992391	5.908796357	18.878095	23.814132	EC05_nonborder_cell_mito_tracker_deep_red_ser_dark_1_5_px_mean_per_well	nonborder_cell_mito_tracker_deep_red_ser_dark_1_5_px_mean_per_well	EC05	MitoTracker	mitochondria	texture	EC	EC05	NA	EC05	EC05 mitochondria MitoTracker texture
1136	1	pheno1	14	73.48761	6.767389749	73.029489	73.6346	EC05_nonborder_cell_mito_tracker_deep_red_ser_edge_1_5_px_mean_per_well	nonborder_cell_mito_tracker_deep_red_ser_edge_1_5_px_mean_per_well	EC05	MitoTracker	mitochondria	texture	EC	EC05	NA	EC05	EC05 mitochondria MitoTracker texture
1137	1	pheno1	6	144.857038	7.255380373	144.462408	146.333909	EC05_nonborder_cell_mito_tracker_deep_red_ser_hole_1_5_px_mean_per_well	nonborder_cell_mito_tracker_deep_red_ser_hole_1_5_px_mean_per_well	EC05	MitoTracker	mitochondria	texture	EC	EC05	NA	EC05	EC05 mitochondria MitoTracker texture
1138	1	pheno1	X	10.545032	7.783814772	7.340308	10.744418	EC05_nonborder_cell_mito_tracker_deep_red_ser_ridge_1_5_px_mean_per_well	nonborder_cell_mito_tracker_deep_red_ser_ridge_1_5_px_mean_per_well	EC05	MitoTracker	mitochondria	texture	EC	EC05	NA	EC05	EC05 mitochondria MitoTracker texture
1139	1	pheno1	11	112.680921	5.540612086	101.793638	112.906817	EC05_nonborder_cell_mito_tracker_deep_red_ser_saddle_1_5_px_mean_per_well	nonborder_cell_mito_tracker_deep_red_ser_saddle_1_5_px_mean_per_well	EC05	MitoTracker	mitochondria	texture	EC	EC05	NA	EC05	EC05 mitochondria MitoTracker texture
1140	1	pheno1	9	108.954682	5.616239677	34.15364	113.69106	EC05_nonborder_cell_mito_tracker_deep_red_ser_spot_1_5_px_mean_per_well	nonborder_cell_mito_tracker_deep_red_ser_spot_1_5_px_mean_per_well	EC05	MitoTracker	mitochondria	texture	EC	EC05	NA	EC05	EC05 mitochondria MitoTracker texture
1141	1	pheno1	2	128.057988	6.403950109	94.368467	132.655807	EC05_nonborder_cell_mito_tracker_deep_red_ser_valley_1_5_px_mean_per_well	nonborder_cell_mito_tracker_deep_red_ser_valley_1_5_px_mean_per_well	EC05	MitoTracker	mitochondria	texture	EC	EC05	NA	EC05	EC05 mitochondria MitoTracker texture
1142	1	pheno1	6	116.821593	6.310590332	116.416092	116.864849	EC05_nonborder_cell_nearest_neighbor_distance_mm_mean_per_well	nonborder_cell_nearest_neighbor_distance_mm_mean_per_well	EC05	MitoTracker	cell	size	EC	EC05	NA	EC05	EC05 cell MitoTracker size
1143	1	pheno1	13	106.166277	6.801050057	102.984451	107.089251	EC05_nonborder_intensity_cytoplasm_3_mito_tracker_deep_red_contrast_mean_per_well	nonborder_intensity_cytoplasm_3_mito_tracker_deep_red_contrast_mean_per_well	EC05	MitoTracker	mitochondria	intensity	EC	EC05	NA	EC05	EC05 mitochondria MitoTracker intensity
1144	1	pheno1	13	9.389583	6.264613562	6.489186	15.81628	EC05_nonborder_intensity_cytoplasm_3_mito_tracker_deep_red_mean_mean_per_well	nonborder_intensity_cytoplasm_3_mito_tracker_deep_red_mean_mean_per_well	EC05	MitoTracker	mitochondria	intensity	EC	EC05	NA	EC05	EC05 mitochondria MitoTracker intensity
1145	1	pheno1	12	100.316765	7.00691985	100.2871	100.356381	EC05_nonborder_intensity_cytoplasm_3_mito_tracker_deep_red_median_mean_per_well	nonborder_intensity_cytoplasm_3_mito_tracker_deep_red_median_mean_per_well	EC05	MitoTracker	mitochondria	intensity	EC	EC05	NA	EC05	EC05 mitochondria MitoTracker intensity
1146	1	pheno1	5	58.352057	5.942535592	52.80277	60.395773	EC05_nonborder_intensity_hoechst_area_contrast_mean_per_well	nonborder_intensity_hoechst_area_contrast_mean_per_well	EC05	Hoechst	nucleus	intensity	EC	EC05	NA	EC05	EC05 nucleus Hoechst intensity
1147	1	pheno1	3	17.210601	6.640884031	16.00532	127.252347	EC05_nonborder_intensity_hoechst_area_mean_mean_per_well	nonborder_intensity_hoechst_area_mean_mean_per_well	EC05	Hoechst	nucleus	intensity	EC	EC05	NA	EC05	EC05 nucleus Hoechst intensity
1148	1	pheno1	13	22.827064	5.875413966	5.882206	22.855703	EC05_nonborder_intensity_hoechst_area_median_mean_per_well	nonborder_intensity_hoechst_area_median_mean_per_well	EC05	Hoechst	nucleus	intensity	EC	EC05	NA	EC05	EC05 nucleus Hoechst intensity
1149	1	pheno1	17	64.404051	6.276416414	62.422915	67.052418	EC05_nonborder_intensity_hoechst_ring_contrast_mean_per_well	nonborder_intensity_hoechst_ring_contrast_mean_per_well	EC05	Hoechst	nucleus	intensity	EC	EC05	NA	EC05	EC05 nucleus Hoechst intensity
1150	1	pheno1	4	150.956264	6.552836531	149.952455	151.144583	EC05_nonborder_intensity_hoechst_ring_mean_mean_per_well	nonborder_intensity_hoechst_ring_mean_mean_per_well	EC05	Hoechst	nucleus	intensity	EC	EC05	NA	EC05	EC05 nucleus Hoechst intensity
1151	1	pheno1	13	22.827064	6.029027049	21.368604	22.855703	EC05_nonborder_intensity_hoechst_ring_median_mean_per_well	nonborder_intensity_hoechst_ring_median_mean_per_well	EC05	Hoechst	nucleus	intensity	EC	EC05	NA	EC05	EC05 nucleus Hoechst intensity
1152	1	pheno1	7	16.507803	7.962563081	13.014253	16.644117	EC05_nonborder_intensity_mitoringregion_mito_tracker_deep_red_contrast_mean_per_well	nonborder_intensity_mitoringregion_mito_tracker_deep_red_contrast_mean_per_well	EC05	MitoTracker	mitochondria	intensity	EC	EC05	NA	EC05	EC05 mitochondria MitoTracker intensity
1153	1	pheno1	19	17.315125	6.758716236	17.122189	18.172211	EC05_nonborder_intensity_mitoringregion_mito_tracker_deep_red_mean_mean_per_well	nonborder_intensity_mitoringregion_mito_tracker_deep_red_mean_mean_per_well	EC05	MitoTracker	mitochondria	intensity	EC	EC05	NA	EC05	EC05 mitochondria MitoTracker intensity
1154	1	pheno1	19	17.143163	7.601222289	16.99362	18.067598	EC05_nonborder_intensity_mitoringregion_mito_tracker_deep_red_median_mean_per_well	nonborder_intensity_mitoringregion_mito_tracker_deep_red_median_mean_per_well	EC05	MitoTracker	mitochondria	intensity	EC	EC05	NA	EC05	EC05 mitochondria MitoTracker intensity
1155	1	pheno1	1	24.356543	7.407904753	21.626922	25.200434	EC05_nonborder_intensity_mitoringregion_mitosmooth_contrast_mean_per_well	nonborder_intensity_mitoringregion_mitosmooth_contrast_mean_per_well	EC05	MitoTracker	mitochondria	intensity	EC	EC05	NA	EC05	EC05 mitochondria MitoTracker intensity
1156	1	pheno1	19	17.315125	7.07962548	17.122189	18.023002	EC05_nonborder_intensity_mitoringregion_mitosmooth_mean_mean_per_well	nonborder_intensity_mitoringregion_mitosmooth_mean_mean_per_well	EC05	MitoTracker	mitochondria	intensity	EC	EC05	NA	EC05	EC05 mitochondria MitoTracker intensity
1157	1	pheno1	19	17.315125	6.501025027	17.122189	24.159853	EC05_nonborder_intensity_mitoringregion_mitosmooth_median_mean_per_well	nonborder_intensity_mitoringregion_mitosmooth_median_mean_per_well	EC05	MitoTracker	mitochondria	intensity	EC	EC05	NA	EC05	EC05 mitochondria MitoTracker intensity
1158	1	pheno1	3	157.847457	6.446069834	157.161994	159.745257	EC05_nonborder_intensity_nucleus_hoechst_33342_contrast_mean_per_well	nonborder_intensity_nucleus_hoechst_33342_contrast_mean_per_well	EC05	Hoechst	nucleus	intensity	EC	EC05	NA	EC05	EC05 nucleus Hoechst intensity
1159	1	pheno1	5	112.703441	5.909483325	110.541262	112.782395	EC05_nonborder_intensity_nucleus_hoechst_33342_mean_mean_per_well	nonborder_intensity_nucleus_hoechst_33342_mean_mean_per_well	EC05	Hoechst	nucleus	intensity	EC	EC05	NA	EC05	EC05 nucleus Hoechst intensity
1160	1	pheno1	2	146.935506	6.326349956	146.638032	178.424807	EC05_nonborder_intensity_nucleus_hoechst_33342_median_mean_per_well	nonborder_intensity_nucleus_hoechst_33342_median_mean_per_well	EC05	Hoechst	nucleus	intensity	EC	EC05	NA	EC05	EC05 nucleus Hoechst intensity
1161	1	pheno1	13	77.13715	5.757489209	72.261764	79.860069	EC05_nonborder_mitosmooth_area_mm2_mean_per_well	nonborder_mitosmooth_area_mm2_mean_per_well	EC05	MitoTracker	cell	size	EC	EC05	NA	EC05	EC05 cell MitoTracker size
1162	1	pheno1	18	39.010369	6.987167513	38.905811	39.66697	EC05_nonborder_mitosmooth_axial_length_ratio_mean_per_well	nonborder_mitosmooth_axial_length_ratio_mean_per_well	EC05	MitoTracker	cell	distribution	EC	EC05	NA	EC05	EC05 cell MitoTracker distribution
1163	1	pheno1	5	49.412737	6.479464286	41.811872	67.787368	EC05_nonborder_mitosmooth_axial_length_ratio_ser_bright_mean_per_well	nonborder_mitosmooth_axial_length_ratio_ser_bright_mean_per_well	EC05	MitoTracker	cell	distribution	EC	EC05	NA	EC05	EC05 cell MitoTracker distribution
1164	1	pheno1	18	39.092243	7.244874285	38.913702	39.764422	EC05_nonborder_mitosmooth_axial_length_ratio_ser_dark_mean_per_well	nonborder_mitosmooth_axial_length_ratio_ser_dark_mean_per_well	EC05	MitoTracker	cell	distribution	EC	EC05	NA	EC05	EC05 cell MitoTracker distribution
1165	1	pheno1	18	39.092243	7.989965833	38.905811	39.764422	EC05_nonborder_mitosmooth_axial_length_ratio_ser_edge_mean_per_well	nonborder_mitosmooth_axial_length_ratio_ser_edge_mean_per_well	EC05	MitoTracker	cell	distribution	EC	EC05	NA	EC05	EC05 cell MitoTracker distribution
1166	1	pheno1	2	69.44823	7.961331309	69.127712	70.331118	EC05_nonborder_mitosmooth_axial_length_ratio_ser_hole_mean_per_well	nonborder_mitosmooth_axial_length_ratio_ser_hole_mean_per_well	EC05	MitoTracker	cell	distribution	EC	EC05	NA	EC05	EC05 cell MitoTracker distribution
1167	1	pheno1	2	71.009733	6.228989275	70.918315	168.320377	EC05_nonborder_mitosmooth_axial_length_ratio_ser_ridge_mean_per_well	nonborder_mitosmooth_axial_length_ratio_ser_ridge_mean_per_well	EC05	MitoTracker	cell	distribution	EC	EC05	NA	EC05	EC05 cell MitoTracker distribution
1168	1	pheno1	18	39.340152	6.878092406	38.920231	39.764422	EC05_nonborder_mitosmooth_axial_length_ratio_ser_saddle_mean_per_well	nonborder_mitosmooth_axial_length_ratio_ser_saddle_mean_per_well	EC05	MitoTracker	cell	distribution	EC	EC05	NA	EC05	EC05 cell MitoTracker distribution
1169	1	pheno1	6	135.793165	6.022463537	135.171913	139.293167	EC05_nonborder_mitosmooth_axial_length_ratio_ser_spot_mean_per_well	nonborder_mitosmooth_axial_length_ratio_ser_spot_mean_per_well	EC05	MitoTracker	cell	distribution	EC	EC05	NA	EC05	EC05 cell MitoTracker distribution
1170	1	pheno1	18	39.127204	7.264244505	38.913702	39.66697	EC05_nonborder_mitosmooth_axial_length_ratio_ser_valley_mean_per_well	nonborder_mitosmooth_axial_length_ratio_ser_valley_mean_per_well	EC05	MitoTracker	cell	distribution	EC	EC05	NA	EC05	EC05 cell MitoTracker distribution
1171	1	pheno1	14	118.483436	8.363800405	118.064862	118.597963	EC05_nonborder_mitosmooth_axial_small_length_mean_per_well	nonborder_mitosmooth_axial_small_length_mean_per_well	EC05	MitoTracker	cell	size	EC	EC05	NA	EC05	EC05 cell MitoTracker size
1172	1	pheno1	16	6.855353	6.91661891	6.332297	8.207812	EC05_nonborder_mitosmooth_axial_small_length_ser_bright_mean_per_well	nonborder_mitosmooth_axial_small_length_ser_bright_mean_per_well	EC05	MitoTracker	cell	distribution	EC	EC05	NA	EC05	EC05 cell MitoTracker distribution
1173	1	pheno1	16	6.807882	7.821535542	4.983824	8.225241	EC05_nonborder_mitosmooth_axial_small_length_ser_dark_mean_per_well	nonborder_mitosmooth_axial_small_length_ser_dark_mean_per_well	EC05	MitoTracker	cell	distribution	EC	EC05	NA	EC05	EC05 cell MitoTracker distribution
1174	1	pheno1	16	6.807882	7.226763054	5.425404	8.225241	EC05_nonborder_mitosmooth_axial_small_length_ser_edge_mean_per_well	nonborder_mitosmooth_axial_small_length_ser_edge_mean_per_well	EC05	MitoTracker	cell	distribution	EC	EC05	NA	EC05	EC05 cell MitoTracker distribution
1175	1	pheno1	14	118.483436	7.851654607	118.067466	118.597963	EC05_nonborder_mitosmooth_axial_small_length_ser_hole_mean_per_well	nonborder_mitosmooth_axial_small_length_ser_hole_mean_per_well	EC05	MitoTracker	cell	distribution	EC	EC05	NA	EC05	EC05 cell MitoTracker distribution
1176	1	pheno1	16	6.855353	7.525537915	6.332297	8.225241	EC05_nonborder_mitosmooth_axial_small_length_ser_ridge_mean_per_well	nonborder_mitosmooth_axial_small_length_ser_ridge_mean_per_well	EC05	MitoTracker	cell	distribution	EC	EC05	NA	EC05	EC05 cell MitoTracker distribution
1177	1	pheno1	16	6.807882	8.172090013	6.332297	8.225241	EC05_nonborder_mitosmooth_axial_small_length_ser_saddle_mean_per_well	nonborder_mitosmooth_axial_small_length_ser_saddle_mean_per_well	EC05	MitoTracker	cell	distribution	EC	EC05	NA	EC05	EC05 cell MitoTracker distribution
1178	1	pheno1	14	118.483436	6.742052062	117.519726	118.597963	EC05_nonborder_mitosmooth_axial_small_length_ser_spot_mean_per_well	nonborder_mitosmooth_axial_small_length_ser_spot_mean_per_well	EC05	MitoTracker	cell	distribution	EC	EC05	NA	EC05	EC05 cell MitoTracker distribution
1179	1	pheno1	16	6.855353	8.026932169	5.548501	8.225241	EC05_nonborder_mitosmooth_axial_small_length_ser_valley_mean_per_well	nonborder_mitosmooth_axial_small_length_ser_valley_mean_per_well	EC05	MitoTracker	cell	distribution	EC	EC05	NA	EC05	EC05 cell MitoTracker distribution
1180	1	pheno1	14	118.430217	7.659465555	118.064862	118.597963	EC05_nonborder_mitosmooth_length_mm_mean_per_well	nonborder_mitosmooth_length_mm_mean_per_well	EC05	MitoTracker	cell	size	EC	EC05	NA	EC05	EC05 cell MitoTracker size
1181	1	pheno1	1	4.504223	7.585776058	3.010274	10.160181	EC05_nonborder_mitosmooth_profile_1_2_mean_per_well	nonborder_mitosmooth_profile_1_2_mean_per_well	EC05	MitoTracker	cell	distribution	EC	EC05	NA	EC05	EC05 cell MitoTracker distribution
1182	1	pheno1	3	10.391531	6.461570471	9.619325	15.100371	EC05_nonborder_mitosmooth_profile_1_2_ser_bright_mean_per_well	nonborder_mitosmooth_profile_1_2_ser_bright_mean_per_well	EC05	MitoTracker	cell	distribution	EC	EC05	NA	EC05	EC05 cell MitoTracker distribution
1183	1	pheno1	5	75.53024	5.934454589	74.147523	77.13883	EC05_nonborder_mitosmooth_profile_1_2_ser_dark_mean_per_well	nonborder_mitosmooth_profile_1_2_ser_dark_mean_per_well	EC05	MitoTracker	cell	distribution	EC	EC05	NA	EC05	EC05 cell MitoTracker distribution
1184	1	pheno1	6	46.642771	6.191338374	46.309188	47.001079	EC05_nonborder_mitosmooth_profile_1_2_ser_edge_mean_per_well	nonborder_mitosmooth_profile_1_2_ser_edge_mean_per_well	EC05	MitoTracker	cell	distribution	EC	EC05	NA	EC05	EC05 cell MitoTracker distribution
1185	1	pheno1	5	130.915789	6.498165043	130.425673	131.964842	EC05_nonborder_mitosmooth_profile_1_2_ser_hole_mean_per_well	nonborder_mitosmooth_profile_1_2_ser_hole_mean_per_well	EC05	MitoTracker	cell	distribution	EC	EC05	NA	EC05	EC05 cell MitoTracker distribution
1186	1	pheno1	X	95.435499	6.293679024	93.491492	96.718081	EC05_nonborder_mitosmooth_profile_1_2_ser_ridge_mean_per_well	nonborder_mitosmooth_profile_1_2_ser_ridge_mean_per_well	EC05	MitoTracker	cell	distribution	EC	EC05	NA	EC05	EC05 cell MitoTracker distribution
1187	1	pheno1	10	92.593302	6.934610697	91.65366	92.645431	EC05_nonborder_mitosmooth_profile_1_2_ser_saddle_mean_per_well	nonborder_mitosmooth_profile_1_2_ser_saddle_mean_per_well	EC05	MitoTracker	cell	distribution	EC	EC05	NA	EC05	EC05 cell MitoTracker distribution
1188	1	pheno1	2	96.811946	6.252977634	93.289415	99.77229	EC05_nonborder_mitosmooth_profile_1_2_ser_spot_mean_per_well	nonborder_mitosmooth_profile_1_2_ser_spot_mean_per_well	EC05	MitoTracker	cell	distribution	EC	EC05	NA	EC05	EC05 cell MitoTracker distribution
1189	1	pheno1	4	137.891974	6.467660185	137.204514	138.307793	EC05_nonborder_mitosmooth_profile_1_2_ser_valley_mean_per_well	nonborder_mitosmooth_profile_1_2_ser_valley_mean_per_well	EC05	MitoTracker	cell	distribution	EC	EC05	NA	EC05	EC05 cell MitoTracker distribution
1190	1	pheno1	14	118.483436	6.468127279	73.48761	118.597963	EC05_nonborder_mitosmooth_profile_2_2_mean_per_well	nonborder_mitosmooth_profile_2_2_mean_per_well	EC05	MitoTracker	cell	distribution	EC	EC05	NA	EC05	EC05 cell MitoTracker distribution
1191	1	pheno1	6	34.119499	5.463915477	33.252622	37.279009	EC05_nonborder_mitosmooth_profile_2_2_ser_bright_mean_per_well	nonborder_mitosmooth_profile_2_2_ser_bright_mean_per_well	EC05	MitoTracker	cell	distribution	EC	EC05	NA	EC05	EC05 cell MitoTracker distribution
1192	1	pheno1	1	57.128646	6.056316021	21.160284	77.492542	EC05_nonborder_mitosmooth_profile_2_2_ser_dark_mean_per_well	nonborder_mitosmooth_profile_2_2_ser_dark_mean_per_well	EC05	MitoTracker	cell	distribution	EC	EC05	NA	EC05	EC05 cell MitoTracker distribution
1193	1	pheno1	14	73.465578	6.48933635	72.99786	118.430217	EC05_nonborder_mitosmooth_profile_2_2_ser_edge_mean_per_well	nonborder_mitosmooth_profile_2_2_ser_edge_mean_per_well	EC05	MitoTracker	cell	distribution	EC	EC05	NA	EC05	EC05 cell MitoTracker distribution
1194	1	pheno1	X	9.837787	6.829489128	8.174841	10.766603	EC05_nonborder_mitosmooth_profile_2_2_ser_hole_mean_per_well	nonborder_mitosmooth_profile_2_2_ser_hole_mean_per_well	EC05	MitoTracker	cell	distribution	EC	EC05	NA	EC05	EC05 cell MitoTracker distribution
1195	1	pheno1	6	119.105608	5.399772936	34.325139	120.642133	EC05_nonborder_mitosmooth_profile_2_2_ser_ridge_mean_per_well	nonborder_mitosmooth_profile_2_2_ser_ridge_mean_per_well	EC05	MitoTracker	cell	distribution	EC	EC05	NA	EC05	EC05 cell MitoTracker distribution
1196	1	pheno1	17	12.140593	5.548643335	4.483309	85.115819	EC05_nonborder_mitosmooth_profile_2_2_ser_saddle_mean_per_well	nonborder_mitosmooth_profile_2_2_ser_saddle_mean_per_well	EC05	MitoTracker	cell	distribution	EC	EC05	NA	EC05	EC05 cell MitoTracker distribution
1197	1	pheno1	10	114.209085	6.192961812	112.771461	115.061475	EC05_nonborder_mitosmooth_profile_2_2_ser_spot_mean_per_well	nonborder_mitosmooth_profile_2_2_ser_spot_mean_per_well	EC05	MitoTracker	cell	distribution	EC	EC05	NA	EC05	EC05 cell MitoTracker distribution
1198	1	pheno1	16	31.17733	6.120980143	31.100332	32.315549	EC05_nonborder_mitosmooth_profile_2_2_ser_valley_mean_per_well	nonborder_mitosmooth_profile_2_2_ser_valley_mean_per_well	EC05	MitoTracker	cell	distribution	EC	EC05	NA	EC05	EC05 cell MitoTracker distribution
1199	1	pheno1	2	92.176288	6.514202331	92.068538	95.584938	EC05_nonborder_mitosmooth_radial_mean_mean_per_well	nonborder_mitosmooth_radial_mean_mean_per_well	EC05	MitoTracker	cell	distribution	EC	EC05	NA	EC05	EC05 cell MitoTracker distribution
1200	1	pheno1	7	16.232225	5.933281128	4.14165	18.740112	EC05_nonborder_mitosmooth_radial_mean_ratio_ser_bright_mean_per_well	nonborder_mitosmooth_radial_mean_ratio_ser_bright_mean_per_well	EC05	MitoTracker	cell	distribution	EC	EC05	NA	EC05	EC05 cell MitoTracker distribution
1201	1	pheno1	14	118.06935	6.372190155	20.26372	118.597963	EC05_nonborder_mitosmooth_radial_mean_ratio_ser_dark_mean_per_well	nonborder_mitosmooth_radial_mean_ratio_ser_dark_mean_per_well	EC05	MitoTracker	cell	distribution	EC	EC05	NA	EC05	EC05 cell MitoTracker distribution
1202	1	pheno1	2	131.88985	6.768533435	127.846024	132.80071	EC05_nonborder_mitosmooth_radial_mean_ratio_ser_edge_mean_per_well	nonborder_mitosmooth_radial_mean_ratio_ser_edge_mean_per_well	EC05	MitoTracker	cell	distribution	EC	EC05	NA	EC05	EC05 cell MitoTracker distribution
1203	1	pheno1	14	24.146128	7.134414636	23.766157	118.597963	EC05_nonborder_mitosmooth_radial_mean_ratio_ser_hole_mean_per_well	nonborder_mitosmooth_radial_mean_ratio_ser_hole_mean_per_well	EC05	MitoTracker	cell	distribution	EC	EC05	NA	EC05	EC05 cell MitoTracker distribution
1204	1	pheno1	4	28.016424	6.738564512	24.672829	93.188836	EC05_nonborder_mitosmooth_radial_mean_ratio_ser_ridge_mean_per_well	nonborder_mitosmooth_radial_mean_ratio_ser_ridge_mean_per_well	EC05	MitoTracker	cell	distribution	EC	EC05	NA	EC05	EC05 cell MitoTracker distribution
1205	1	pheno1	2	94.48453	6.59571401	92.812224	134.362146	EC05_nonborder_mitosmooth_radial_mean_ratio_ser_saddle_mean_per_well	nonborder_mitosmooth_radial_mean_ratio_ser_saddle_mean_per_well	EC05	MitoTracker	cell	distribution	EC	EC05	NA	EC05	EC05 cell MitoTracker distribution
1206	1	pheno1	4	95.653018	6.752914605	93.460096	97.787653	EC05_nonborder_mitosmooth_radial_mean_ratio_ser_spot_mean_per_well	nonborder_mitosmooth_radial_mean_ratio_ser_spot_mean_per_well	EC05	MitoTracker	cell	distribution	EC	EC05	NA	EC05	EC05 cell MitoTracker distribution
1207	1	pheno1	2	69.444957	6.17049076	69.021368	101.734998	EC05_nonborder_mitosmooth_radial_mean_ratio_ser_valley_mean_per_well	nonborder_mitosmooth_radial_mean_ratio_ser_valley_mean_per_well	EC05	MitoTracker	cell	distribution	EC	EC05	NA	EC05	EC05 cell MitoTracker distribution
1208	1	pheno1	12	56.170955	7.048239094	54.391628	56.498555	EC05_nonborder_mitosmooth_radial_mean_ser_bright_mean_per_well	nonborder_mitosmooth_radial_mean_ser_bright_mean_per_well	EC05	MitoTracker	cell	distribution	EC	EC05	NA	EC05	EC05 cell MitoTracker distribution
1209	1	pheno1	16	6.807882	6.096042283	6.332297	8.47259	EC05_nonborder_mitosmooth_radial_mean_ser_dark_mean_per_well	nonborder_mitosmooth_radial_mean_ser_dark_mean_per_well	EC05	MitoTracker	cell	distribution	EC	EC05	NA	EC05	EC05 cell MitoTracker distribution
1210	1	pheno1	2	92.919445	6.86789953	92.096288	93.858347	EC05_nonborder_mitosmooth_radial_mean_ser_edge_mean_per_well	nonborder_mitosmooth_radial_mean_ser_edge_mean_per_well	EC05	MitoTracker	cell	distribution	EC	EC05	NA	EC05	EC05 cell MitoTracker distribution
1211	1	pheno1	14	118.43331	6.845244305	117.980274	118.597963	EC05_nonborder_mitosmooth_radial_mean_ser_hole_mean_per_well	nonborder_mitosmooth_radial_mean_ser_hole_mean_per_well	EC05	MitoTracker	cell	distribution	EC	EC05	NA	EC05	EC05 cell MitoTracker distribution
1212	1	pheno1	12	56.170955	6.968200765	54.35824	56.498555	EC05_nonborder_mitosmooth_radial_mean_ser_ridge_mean_per_well	nonborder_mitosmooth_radial_mean_ser_ridge_mean_per_well	EC05	MitoTracker	cell	distribution	EC	EC05	NA	EC05	EC05 cell MitoTracker distribution
1213	1	pheno1	2	70.138178	6.291012674	69.127712	93.76552	EC05_nonborder_mitosmooth_radial_mean_ser_saddle_mean_per_well	nonborder_mitosmooth_radial_mean_ser_saddle_mean_per_well	EC05	MitoTracker	cell	distribution	EC	EC05	NA	EC05	EC05 cell MitoTracker distribution
1214	1	pheno1	12	56.170955	6.801827549	53.949981	56.719472	EC05_nonborder_mitosmooth_radial_mean_ser_spot_mean_per_well	nonborder_mitosmooth_radial_mean_ser_spot_mean_per_well	EC05	MitoTracker	cell	distribution	EC	EC05	NA	EC05	EC05 cell MitoTracker distribution
1215	1	pheno1	16	6.807882	6.215824924	6.332297	8.47259	EC05_nonborder_mitosmooth_radial_mean_ser_valley_mean_per_well	nonborder_mitosmooth_radial_mean_ser_valley_mean_per_well	EC05	MitoTracker	cell	distribution	EC	EC05	NA	EC05	EC05 cell MitoTracker distribution
1216	1	pheno1	5	127.59742	6.04744287	126.063476	127.692712	EC05_nonborder_mitosmooth_radial_relative_deviation_mean_per_well	nonborder_mitosmooth_radial_relative_deviation_mean_per_well	EC05	MitoTracker	cell	distribution	EC	EC05	NA	EC05	EC05 cell MitoTracker distribution
1217	1	pheno1	X	62.598867	6.701843378	59.127323	65.294562	EC05_nonborder_mitosmooth_radial_relative_deviation_ser_bright_mean_per_well	nonborder_mitosmooth_radial_relative_deviation_ser_bright_mean_per_well	EC05	MitoTracker	cell	distribution	EC	EC05	NA	EC05	EC05 cell MitoTracker distribution
1218	1	pheno1	2	93.672624	8.72197712	93.000585	95.137215	EC05_nonborder_mitosmooth_radial_relative_deviation_ser_dark_mean_per_well	nonborder_mitosmooth_radial_relative_deviation_ser_dark_mean_per_well	EC05	MitoTracker	cell	distribution	EC	EC05	NA	EC05	EC05 cell MitoTracker distribution
1219	1	pheno1	2	93.659439	8.604682367	92.935236	94.281429	EC05_nonborder_mitosmooth_radial_relative_deviation_ser_edge_mean_per_well	nonborder_mitosmooth_radial_relative_deviation_ser_edge_mean_per_well	EC05	MitoTracker	cell	distribution	EC	EC05	NA	EC05	EC05 cell MitoTracker distribution
1220	1	pheno1	2	93.657008	7.734311759	69.264682	94.506214	EC05_nonborder_mitosmooth_radial_relative_deviation_ser_hole_mean_per_well	nonborder_mitosmooth_radial_relative_deviation_ser_hole_mean_per_well	EC05	MitoTracker	cell	distribution	EC	EC05	NA	EC05	EC05 cell MitoTracker distribution
1221	1	pheno1	3	75.305676	6.858456426	70.301869	78.987181	EC05_nonborder_mitosmooth_radial_relative_deviation_ser_ridge_mean_per_well	nonborder_mitosmooth_radial_relative_deviation_ser_ridge_mean_per_well	EC05	MitoTracker	cell	distribution	EC	EC05	NA	EC05	EC05 cell MitoTracker distribution
1222	1	pheno1	2	93.657008	7.791594896	93.304385	95.049874	EC05_nonborder_mitosmooth_radial_relative_deviation_ser_saddle_mean_per_well	nonborder_mitosmooth_radial_relative_deviation_ser_saddle_mean_per_well	EC05	MitoTracker	cell	distribution	EC	EC05	NA	EC05	EC05 cell MitoTracker distribution
1223	1	pheno1	X	63.765136	6.075395072	60.045718	69.213246	EC05_nonborder_mitosmooth_radial_relative_deviation_ser_spot_mean_per_well	nonborder_mitosmooth_radial_relative_deviation_ser_spot_mean_per_well	EC05	MitoTracker	cell	distribution	EC	EC05	NA	EC05	EC05 cell MitoTracker distribution
1224	1	pheno1	2	93.692155	8.3955832	92.935236	95.584938	EC05_nonborder_mitosmooth_radial_relative_deviation_ser_valley_mean_per_well	nonborder_mitosmooth_radial_relative_deviation_ser_valley_mean_per_well	EC05	MitoTracker	cell	distribution	EC	EC05	NA	EC05	EC05 cell MitoTracker distribution
1225	1	pheno1	2	93.672624	6.840491285	69.790261	97.288543	EC05_nonborder_mitosmooth_ratio_width_to_length_mean_per_well	nonborder_mitosmooth_ratio_width_to_length_mean_per_well	EC05	MitoTracker	cell	shape	EC	EC05	NA	EC05	EC05 cell MitoTracker shape
1226	1	pheno1	2	69.934264	6.755987745	69.127712	94.506214	EC05_nonborder_mitosmooth_roundness_mean_per_well	nonborder_mitosmooth_roundness_mean_per_well	EC05	MitoTracker	cell	shape	EC	EC05	NA	EC05	EC05 cell MitoTracker shape
1227	1	pheno1	18	39.006458	6.741156026	38.920231	39.66697	EC05_nonborder_mitosmooth_symmetry_02_mean_per_well	nonborder_mitosmooth_symmetry_02_mean_per_well	EC05	MitoTracker	cell	distribution	EC	EC05	NA	EC05	EC05 cell MitoTracker distribution
1228	1	pheno1	9	27.941166	6.003430889	27.785621	28.15895	EC05_nonborder_mitosmooth_symmetry_02_ser_bright_mean_per_well	nonborder_mitosmooth_symmetry_02_ser_bright_mean_per_well	EC05	MitoTracker	cell	distribution	EC	EC05	NA	EC05	EC05 cell MitoTracker distribution
1229	1	pheno1	18	39.092243	9.720824472	38.920231	39.66697	EC05_nonborder_mitosmooth_symmetry_02_ser_dark_mean_per_well	nonborder_mitosmooth_symmetry_02_ser_dark_mean_per_well	EC05	MitoTracker	cell	distribution	EC	EC05	NA	EC05	EC05 cell MitoTracker distribution
1230	1	pheno1	18	39.192689	9.562425065	38.934898	39.593725	EC05_nonborder_mitosmooth_symmetry_02_ser_edge_mean_per_well	nonborder_mitosmooth_symmetry_02_ser_edge_mean_per_well	EC05	MitoTracker	cell	distribution	EC	EC05	NA	EC05	EC05 cell MitoTracker distribution
1231	1	pheno1	1	25.898177	6.228270975	24.521247	92.964955	EC05_nonborder_mitosmooth_symmetry_02_ser_hole_mean_per_well	nonborder_mitosmooth_symmetry_02_ser_hole_mean_per_well	EC05	MitoTracker	cell	distribution	EC	EC05	NA	EC05	EC05 cell MitoTracker distribution
1232	1	pheno1	5	42.154886	6.043849113	41.342549	106.224266	EC05_nonborder_mitosmooth_symmetry_02_ser_ridge_mean_per_well	nonborder_mitosmooth_symmetry_02_ser_ridge_mean_per_well	EC05	MitoTracker	cell	distribution	EC	EC05	NA	EC05	EC05 cell MitoTracker distribution
1233	1	pheno1	18	39.265618	7.905900362	38.920231	39.66697	EC05_nonborder_mitosmooth_symmetry_02_ser_saddle_mean_per_well	nonborder_mitosmooth_symmetry_02_ser_saddle_mean_per_well	EC05	MitoTracker	cell	distribution	EC	EC05	NA	EC05	EC05 cell MitoTracker distribution
1234	1	pheno1	5	103.183402	6.838991355	102.932938	103.313179	EC05_nonborder_mitosmooth_symmetry_02_ser_spot_mean_per_well	nonborder_mitosmooth_symmetry_02_ser_spot_mean_per_well	EC05	MitoTracker	cell	distribution	EC	EC05	NA	EC05	EC05 cell MitoTracker distribution
1235	1	pheno1	18	39.092243	9.748171807	38.934898	39.764422	EC05_nonborder_mitosmooth_symmetry_02_ser_valley_mean_per_well	nonborder_mitosmooth_symmetry_02_ser_valley_mean_per_well	EC05	MitoTracker	cell	distribution	EC	EC05	NA	EC05	EC05 cell MitoTracker distribution
1236	1	pheno1	12	105.48578	8.948696517	104.743985	105.643292	EC05_nonborder_mitosmooth_symmetry_03_mean_per_well	nonborder_mitosmooth_symmetry_03_mean_per_well	EC05	MitoTracker	cell	distribution	EC	EC05	NA	EC05	EC05 cell MitoTracker distribution
1237	1	pheno1	6	118.482742	6.69325826	118.389706	119.573219	EC05_nonborder_mitosmooth_symmetry_03_ser_bright_mean_per_well	nonborder_mitosmooth_symmetry_03_ser_bright_mean_per_well	EC05	MitoTracker	cell	distribution	EC	EC05	NA	EC05	EC05 cell MitoTracker distribution
1238	1	pheno1	2	33.930663	6.544879352	32.90613	94.11279	EC05_nonborder_mitosmooth_symmetry_03_ser_dark_mean_per_well	nonborder_mitosmooth_symmetry_03_ser_dark_mean_per_well	EC05	MitoTracker	cell	distribution	EC	EC05	NA	EC05	EC05 cell MitoTracker distribution
1239	1	pheno1	2	93.627414	6.668360125	76.913988	93.867811	EC05_nonborder_mitosmooth_symmetry_03_ser_edge_mean_per_well	nonborder_mitosmooth_symmetry_03_ser_edge_mean_per_well	EC05	MitoTracker	cell	distribution	EC	EC05	NA	EC05	EC05 cell MitoTracker distribution
1240	1	pheno1	5	45.809134	6.44348301	45.322785	111.628426	EC05_nonborder_mitosmooth_symmetry_03_ser_hole_mean_per_well	nonborder_mitosmooth_symmetry_03_ser_hole_mean_per_well	EC05	MitoTracker	cell	distribution	EC	EC05	NA	EC05	EC05 cell MitoTracker distribution
1241	1	pheno1	13	99.912118	6.386293102	5.741506	102.991729	EC05_nonborder_mitosmooth_symmetry_03_ser_ridge_mean_per_well	nonborder_mitosmooth_symmetry_03_ser_ridge_mean_per_well	EC05	MitoTracker	cell	distribution	EC	EC05	NA	EC05	EC05 cell MitoTracker distribution
1242	1	pheno1	1	89.50712	6.00677055	88.083064	195.360017	EC05_nonborder_mitosmooth_symmetry_03_ser_saddle_mean_per_well	nonborder_mitosmooth_symmetry_03_ser_saddle_mean_per_well	EC05	MitoTracker	cell	distribution	EC	EC05	NA	EC05	EC05 cell MitoTracker distribution
1243	1	pheno1	14	118.320059	6.740261836	117.892986	118.924668	EC05_nonborder_mitosmooth_symmetry_03_ser_spot_mean_per_well	nonborder_mitosmooth_symmetry_03_ser_spot_mean_per_well	EC05	MitoTracker	cell	distribution	EC	EC05	NA	EC05	EC05 cell MitoTracker distribution
1244	1	pheno1	6	42.422779	7.326100911	37.652648	43.581424	EC05_nonborder_mitosmooth_symmetry_03_ser_valley_mean_per_well	nonborder_mitosmooth_symmetry_03_ser_valley_mean_per_well	EC05	MitoTracker	cell	distribution	EC	EC05	NA	EC05	EC05 cell MitoTracker distribution
1245	1	pheno1	2	71.009733	7.474021491	70.348	95.479008	EC05_nonborder_mitosmooth_symmetry_04_mean_per_well	nonborder_mitosmooth_symmetry_04_mean_per_well	EC05	MitoTracker	cell	distribution	EC	EC05	NA	EC05	EC05 cell MitoTracker distribution
1246	1	pheno1	X	11.192881	6.260897227	10.962359	11.267026	EC05_nonborder_mitosmooth_symmetry_04_ser_bright_mean_per_well	nonborder_mitosmooth_symmetry_04_ser_bright_mean_per_well	EC05	MitoTracker	cell	distribution	EC	EC05	NA	EC05	EC05 cell MitoTracker distribution
1247	1	pheno1	18	39.006458	7.378663896	38.964913	39.66697	EC05_nonborder_mitosmooth_symmetry_04_ser_dark_mean_per_well	nonborder_mitosmooth_symmetry_04_ser_dark_mean_per_well	EC05	MitoTracker	cell	distribution	EC	EC05	NA	EC05	EC05 cell MitoTracker distribution
1248	1	pheno1	18	39.006458	7.749087492	38.934898	39.593725	EC05_nonborder_mitosmooth_symmetry_04_ser_edge_mean_per_well	nonborder_mitosmooth_symmetry_04_ser_edge_mean_per_well	EC05	MitoTracker	cell	distribution	EC	EC05	NA	EC05	EC05 cell MitoTracker distribution
1249	1	pheno1	5	13.901383	5.535576279	12.178802	126.226598	EC05_nonborder_mitosmooth_symmetry_04_ser_hole_mean_per_well	nonborder_mitosmooth_symmetry_04_ser_hole_mean_per_well	EC05	MitoTracker	cell	distribution	EC	EC05	NA	EC05	EC05 cell MitoTracker distribution
1250	1	pheno1	9	116.900242	5.883086637	60.242755	118.863411	EC05_nonborder_mitosmooth_symmetry_04_ser_ridge_mean_per_well	nonborder_mitosmooth_symmetry_04_ser_ridge_mean_per_well	EC05	MitoTracker	cell	distribution	EC	EC05	NA	EC05	EC05 cell MitoTracker distribution
1251	1	pheno1	10	90.208784	7.741771667	89.119986	90.95085	EC05_nonborder_mitosmooth_symmetry_04_ser_saddle_mean_per_well	nonborder_mitosmooth_symmetry_04_ser_saddle_mean_per_well	EC05	MitoTracker	cell	distribution	EC	EC05	NA	EC05	EC05 cell MitoTracker distribution
1252	1	pheno1	1	54.470638	6.226473311	51.874195	57.920551	EC05_nonborder_mitosmooth_symmetry_04_ser_spot_mean_per_well	nonborder_mitosmooth_symmetry_04_ser_spot_mean_per_well	EC05	MitoTracker	cell	distribution	EC	EC05	NA	EC05	EC05 cell MitoTracker distribution
1253	1	pheno1	2	93.745744	6.813190152	70.935439	96.759448	EC05_nonborder_mitosmooth_symmetry_04_ser_valley_mean_per_well	nonborder_mitosmooth_symmetry_04_ser_valley_mean_per_well	EC05	MitoTracker	cell	distribution	EC	EC05	NA	EC05	EC05 cell MitoTracker distribution
1254	1	pheno1	2	93.745744	6.664249536	74.703716	97.448955	EC05_nonborder_mitosmooth_symmetry_05_mean_per_well	nonborder_mitosmooth_symmetry_05_mean_per_well	EC05	MitoTracker	cell	distribution	EC	EC05	NA	EC05	EC05 cell MitoTracker distribution
1255	1	pheno1	14	31.22418	5.683360419	30.559596	32.047397	EC05_nonborder_mitosmooth_symmetry_05_ser_bright_mean_per_well	nonborder_mitosmooth_symmetry_05_ser_bright_mean_per_well	EC05	MitoTracker	cell	distribution	EC	EC05	NA	EC05	EC05 cell MitoTracker distribution
1256	1	pheno1	2	92.654412	7.178530696	92.096288	93.659439	EC05_nonborder_mitosmooth_symmetry_05_ser_dark_mean_per_well	nonborder_mitosmooth_symmetry_05_ser_dark_mean_per_well	EC05	MitoTracker	cell	distribution	EC	EC05	NA	EC05	EC05 cell MitoTracker distribution
1257	1	pheno1	12	104.261464	7.614338591	104.218178	104.955059	EC05_nonborder_mitosmooth_symmetry_05_ser_edge_mean_per_well	nonborder_mitosmooth_symmetry_05_ser_edge_mean_per_well	EC05	MitoTracker	cell	distribution	EC	EC05	NA	EC05	EC05 cell MitoTracker distribution
1258	1	pheno1	14	118.154169	7.752303295	84.701798	118.597963	EC05_nonborder_mitosmooth_symmetry_05_ser_hole_mean_per_well	nonborder_mitosmooth_symmetry_05_ser_hole_mean_per_well	EC05	MitoTracker	cell	distribution	EC	EC05	NA	EC05	EC05 cell MitoTracker distribution
1259	1	pheno1	17	49.158013	5.406845291	48.581706	49.345502	EC05_nonborder_mitosmooth_symmetry_05_ser_ridge_mean_per_well	nonborder_mitosmooth_symmetry_05_ser_ridge_mean_per_well	EC05	MitoTracker	cell	distribution	EC	EC05	NA	EC05	EC05 cell MitoTracker distribution
1260	1	pheno1	17	49.248922	5.408953588	23.861492	49.489254	EC05_nonborder_mitosmooth_symmetry_05_ser_saddle_mean_per_well	nonborder_mitosmooth_symmetry_05_ser_saddle_mean_per_well	EC05	MitoTracker	cell	distribution	EC	EC05	NA	EC05	EC05 cell MitoTracker distribution
1261	1	pheno1	11	89.149716	5.757787424	88.773867	118.217311	EC05_nonborder_mitosmooth_symmetry_05_ser_spot_mean_per_well	nonborder_mitosmooth_symmetry_05_ser_spot_mean_per_well	EC05	MitoTracker	cell	distribution	EC	EC05	NA	EC05	EC05 cell MitoTracker distribution
1262	1	pheno1	2	92.654412	6.89521915	75.694566	93.659439	EC05_nonborder_mitosmooth_symmetry_05_ser_valley_mean_per_well	nonborder_mitosmooth_symmetry_05_ser_valley_mean_per_well	EC05	MitoTracker	cell	distribution	EC	EC05	NA	EC05	EC05 cell MitoTracker distribution
1263	1	pheno1	18	39.092243	6.659991914	38.905811	39.736596	EC05_nonborder_mitosmooth_symmetry_12_mean_per_well	nonborder_mitosmooth_symmetry_12_mean_per_well	EC05	MitoTracker	cell	distribution	EC	EC05	NA	EC05	EC05 cell MitoTracker distribution
1264	1	pheno1	5	67.512159	6.562018437	41.811872	103.174872	EC05_nonborder_mitosmooth_symmetry_12_ser_bright_mean_per_well	nonborder_mitosmooth_symmetry_12_ser_bright_mean_per_well	EC05	MitoTracker	cell	distribution	EC	EC05	NA	EC05	EC05 cell MitoTracker distribution
1265	1	pheno1	18	39.561123	9.115306503	38.934898	39.66697	EC05_nonborder_mitosmooth_symmetry_12_ser_dark_mean_per_well	nonborder_mitosmooth_symmetry_12_ser_dark_mean_per_well	EC05	MitoTracker	cell	distribution	EC	EC05	NA	EC05	EC05 cell MitoTracker distribution
1266	1	pheno1	18	39.192689	8.210531798	38.920231	39.66697	EC05_nonborder_mitosmooth_symmetry_12_ser_edge_mean_per_well	nonborder_mitosmooth_symmetry_12_ser_edge_mean_per_well	EC05	MitoTracker	cell	distribution	EC	EC05	NA	EC05	EC05 cell MitoTracker distribution
1267	1	pheno1	18	39.340152	7.131084535	38.934898	39.764422	EC05_nonborder_mitosmooth_symmetry_12_ser_hole_mean_per_well	nonborder_mitosmooth_symmetry_12_ser_hole_mean_per_well	EC05	MitoTracker	cell	distribution	EC	EC05	NA	EC05	EC05 cell MitoTracker distribution
1268	1	pheno1	5	66.168177	5.480767173	28.287957	103.24587	EC05_nonborder_mitosmooth_symmetry_12_ser_ridge_mean_per_well	nonborder_mitosmooth_symmetry_12_ser_ridge_mean_per_well	EC05	MitoTracker	cell	distribution	EC	EC05	NA	EC05	EC05 cell MitoTracker distribution
1269	1	pheno1	18	39.265618	6.785394974	38.913702	39.736596	EC05_nonborder_mitosmooth_symmetry_12_ser_saddle_mean_per_well	nonborder_mitosmooth_symmetry_12_ser_saddle_mean_per_well	EC05	MitoTracker	cell	distribution	EC	EC05	NA	EC05	EC05 cell MitoTracker distribution
1270	1	pheno1	6	136.080782	6.274427661	135.206162	138.550908	EC05_nonborder_mitosmooth_symmetry_12_ser_spot_mean_per_well	nonborder_mitosmooth_symmetry_12_ser_spot_mean_per_well	EC05	MitoTracker	cell	distribution	EC	EC05	NA	EC05	EC05 cell MitoTracker distribution
1271	1	pheno1	18	39.092243	8.575669732	38.934898	39.66697	EC05_nonborder_mitosmooth_symmetry_12_ser_valley_mean_per_well	nonborder_mitosmooth_symmetry_12_ser_valley_mean_per_well	EC05	MitoTracker	cell	distribution	EC	EC05	NA	EC05	EC05 cell MitoTracker distribution
1272	1	pheno1	12	104.763221	8.505222294	104.233904	105.487052	EC05_nonborder_mitosmooth_symmetry_13_mean_per_well	nonborder_mitosmooth_symmetry_13_mean_per_well	EC05	MitoTracker	cell	distribution	EC	EC05	NA	EC05	EC05 cell MitoTracker distribution
1273	1	pheno1	6	118.482742	6.052542367	117.446498	119.573219	EC05_nonborder_mitosmooth_symmetry_13_ser_bright_mean_per_well	nonborder_mitosmooth_symmetry_13_ser_bright_mean_per_well	EC05	MitoTracker	cell	distribution	EC	EC05	NA	EC05	EC05 cell MitoTracker distribution
1274	1	pheno1	2	93.627414	6.615487596	9.353258	93.928917	EC05_nonborder_mitosmooth_symmetry_13_ser_dark_mean_per_well	nonborder_mitosmooth_symmetry_13_ser_dark_mean_per_well	EC05	MitoTracker	cell	distribution	EC	EC05	NA	EC05	EC05 cell MitoTracker distribution
1275	1	pheno1	2	93.627414	7.180812447	92.591656	93.858347	EC05_nonborder_mitosmooth_symmetry_13_ser_edge_mean_per_well	nonborder_mitosmooth_symmetry_13_ser_edge_mean_per_well	EC05	MitoTracker	cell	distribution	EC	EC05	NA	EC05	EC05 cell MitoTracker distribution
1276	1	pheno1	12	43.68154	7.311090729	40.55505	44.955749	EC05_nonborder_mitosmooth_symmetry_13_ser_hole_mean_per_well	nonborder_mitosmooth_symmetry_13_ser_hole_mean_per_well	EC05	MitoTracker	cell	distribution	EC	EC05	NA	EC05	EC05 cell MitoTracker distribution
1277	1	pheno1	6	110.022241	7.128258898	109.260535	110.202989	EC05_nonborder_mitosmooth_symmetry_13_ser_ridge_mean_per_well	nonborder_mitosmooth_symmetry_13_ser_ridge_mean_per_well	EC05	MitoTracker	cell	distribution	EC	EC05	NA	EC05	EC05 cell MitoTracker distribution
1278	1	pheno1	X	47.089111	5.844053598	41.405426	142.540549	EC05_nonborder_mitosmooth_symmetry_13_ser_spot_mean_per_well	nonborder_mitosmooth_symmetry_13_ser_spot_mean_per_well	EC05	MitoTracker	cell	distribution	EC	EC05	NA	EC05	EC05 cell MitoTracker distribution
1279	1	pheno1	2	93.627414	7.692347976	76.709141	93.858347	EC05_nonborder_mitosmooth_symmetry_13_ser_valley_mean_per_well	nonborder_mitosmooth_symmetry_13_ser_valley_mean_per_well	EC05	MitoTracker	cell	distribution	EC	EC05	NA	EC05	EC05 cell MitoTracker distribution
1280	1	pheno1	2	71.009733	7.518113221	69.616475	94.506214	EC05_nonborder_mitosmooth_symmetry_14_mean_per_well	nonborder_mitosmooth_symmetry_14_mean_per_well	EC05	MitoTracker	cell	distribution	EC	EC05	NA	EC05	EC05 cell MitoTracker distribution
1281	1	pheno1	7	99.337835	7.514477447	98.538517	100.028563	EC05_nonborder_mitosmooth_symmetry_14_ser_bright_mean_per_well	nonborder_mitosmooth_symmetry_14_ser_bright_mean_per_well	EC05	MitoTracker	cell	distribution	EC	EC05	NA	EC05	EC05 cell MitoTracker distribution
1282	1	pheno1	18	39.006458	8.103040407	38.964913	39.593725	EC05_nonborder_mitosmooth_symmetry_14_ser_dark_mean_per_well	nonborder_mitosmooth_symmetry_14_ser_dark_mean_per_well	EC05	MitoTracker	cell	distribution	EC	EC05	NA	EC05	EC05 cell MitoTracker distribution
1283	1	pheno1	18	39.006458	8.088495822	38.920231	39.593725	EC05_nonborder_mitosmooth_symmetry_14_ser_edge_mean_per_well	nonborder_mitosmooth_symmetry_14_ser_edge_mean_per_well	EC05	MitoTracker	cell	distribution	EC	EC05	NA	EC05	EC05 cell MitoTracker distribution
1284	1	pheno1	7	10.805216	6.856304686	6.780486	11.735482	EC05_nonborder_mitosmooth_symmetry_14_ser_hole_mean_per_well	nonborder_mitosmooth_symmetry_14_ser_hole_mean_per_well	EC05	MitoTracker	cell	distribution	EC	EC05	NA	EC05	EC05 cell MitoTracker distribution
1285	1	pheno1	10	89.9348	8.144397779	89.164697	90.856005	EC05_nonborder_mitosmooth_symmetry_14_ser_ridge_mean_per_well	nonborder_mitosmooth_symmetry_14_ser_ridge_mean_per_well	EC05	MitoTracker	cell	distribution	EC	EC05	NA	EC05	EC05 cell MitoTracker distribution
1286	1	pheno1	10	90.389823	7.19549952	89.09936	92.344451	EC05_nonborder_mitosmooth_symmetry_14_ser_saddle_mean_per_well	nonborder_mitosmooth_symmetry_14_ser_saddle_mean_per_well	EC05	MitoTracker	cell	distribution	EC	EC05	NA	EC05	EC05 cell MitoTracker distribution
1287	1	pheno1	1	186.161243	5.712106179	51.878108	187.030388	EC05_nonborder_mitosmooth_symmetry_14_ser_spot_mean_per_well	nonborder_mitosmooth_symmetry_14_ser_spot_mean_per_well	EC05	MitoTracker	cell	distribution	EC	EC05	NA	EC05	EC05 cell MitoTracker distribution
1288	1	pheno1	18	39.006458	8.959804077	38.964913	39.593725	EC05_nonborder_mitosmooth_symmetry_14_ser_valley_mean_per_well	nonborder_mitosmooth_symmetry_14_ser_valley_mean_per_well	EC05	MitoTracker	cell	distribution	EC	EC05	NA	EC05	EC05 cell MitoTracker distribution
1289	1	pheno1	12	104.261464	6.020087047	46.317543	105.687482	EC05_nonborder_mitosmooth_symmetry_15_mean_per_well	nonborder_mitosmooth_symmetry_15_mean_per_well	EC05	MitoTracker	cell	distribution	EC	EC05	NA	EC05	EC05 cell MitoTracker distribution
1290	1	pheno1	9	121.842277	5.346314794	121.626686	123.830483	EC05_nonborder_mitosmooth_symmetry_15_ser_bright_mean_per_well	nonborder_mitosmooth_symmetry_15_ser_bright_mean_per_well	EC05	MitoTracker	cell	distribution	EC	EC05	NA	EC05	EC05 cell MitoTracker distribution
1291	1	pheno1	2	93.469368	7.539369213	71.044297	94.159212	EC05_nonborder_mitosmooth_symmetry_15_ser_dark_mean_per_well	nonborder_mitosmooth_symmetry_15_ser_dark_mean_per_well	EC05	MitoTracker	cell	distribution	EC	EC05	NA	EC05	EC05 cell MitoTracker distribution
1292	1	pheno1	12	104.261464	8.486213451	104.233904	105.488423	EC05_nonborder_mitosmooth_symmetry_15_ser_edge_mean_per_well	nonborder_mitosmooth_symmetry_15_ser_edge_mean_per_well	EC05	MitoTracker	cell	distribution	EC	EC05	NA	EC05	EC05 cell MitoTracker distribution
1293	1	pheno1	16	28.892323	6.393224689	28.374771	29.50554	EC05_nonborder_mitosmooth_symmetry_15_ser_hole_mean_per_well	nonborder_mitosmooth_symmetry_15_ser_hole_mean_per_well	EC05	MitoTracker	cell	distribution	EC	EC05	NA	EC05	EC05 cell MitoTracker distribution
1294	1	pheno1	18	32.085175	5.914694859	30.394919	33.739815	EC05_nonborder_mitosmooth_symmetry_15_ser_ridge_mean_per_well	nonborder_mitosmooth_symmetry_15_ser_ridge_mean_per_well	EC05	MitoTracker	cell	distribution	EC	EC05	NA	EC05	EC05 cell MitoTracker distribution
1295	1	pheno1	6	45.016649	5.547335028	42.540082	142.221697	EC05_nonborder_mitosmooth_symmetry_15_ser_saddle_mean_per_well	nonborder_mitosmooth_symmetry_15_ser_saddle_mean_per_well	EC05	MitoTracker	cell	distribution	EC	EC05	NA	EC05	EC05 cell MitoTracker distribution
1296	1	pheno1	X	10.878028	6.331687703	10.522405	38.446674	EC05_nonborder_mitosmooth_symmetry_15_ser_spot_mean_per_well	nonborder_mitosmooth_symmetry_15_ser_spot_mean_per_well	EC05	MitoTracker	cell	distribution	EC	EC05	NA	EC05	EC05 cell MitoTracker distribution
1297	1	pheno1	2	93.469368	7.662893591	92.097914	94.48453	EC05_nonborder_mitosmooth_symmetry_15_ser_valley_mean_per_well	nonborder_mitosmooth_symmetry_15_ser_valley_mean_per_well	EC05	MitoTracker	cell	distribution	EC	EC05	NA	EC05	EC05 cell MitoTracker distribution
1298	1	pheno1	8	7.308965	6.730988181	4.101397	7.742905	EC05_nonborder_mitosmooth_threshold_compactness_30_percent_mean_per_well	nonborder_mitosmooth_threshold_compactness_30_percent_mean_per_well	EC05	MitoTracker	cell	compactness	EC	EC05	NA	EC05	EC05 cell MitoTracker compactness
1299	1	pheno1	12	54.174382	6.843060738	39.934779	56.356876	EC05_nonborder_mitosmooth_threshold_compactness_30_percent_ser_bright_mean_per_well	nonborder_mitosmooth_threshold_compactness_30_percent_ser_bright_mean_per_well	EC05	MitoTracker	cell	compactness	EC	EC05	NA	EC05	EC05 cell MitoTracker compactness
1300	1	pheno1	12	54.40644	6.67866452	45.113665	56.051499	EC05_nonborder_mitosmooth_threshold_compactness_30_percent_ser_dark_mean_per_well	nonborder_mitosmooth_threshold_compactness_30_percent_ser_dark_mean_per_well	EC05	MitoTracker	cell	compactness	EC	EC05	NA	EC05	EC05 cell MitoTracker compactness
1301	1	pheno1	12	54.40644	6.732879013	44.589492	56.356876	EC05_nonborder_mitosmooth_threshold_compactness_30_percent_ser_edge_mean_per_well	nonborder_mitosmooth_threshold_compactness_30_percent_ser_edge_mean_per_well	EC05	MitoTracker	cell	compactness	EC	EC05	NA	EC05	EC05 cell MitoTracker compactness
1302	1	pheno1	2	69.44823	6.875505161	68.89443	70.6441	EC05_nonborder_mitosmooth_threshold_compactness_30_percent_ser_hole_mean_per_well	nonborder_mitosmooth_threshold_compactness_30_percent_ser_hole_mean_per_well	EC05	MitoTracker	cell	compactness	EC	EC05	NA	EC05	EC05 cell MitoTracker compactness
1303	1	pheno1	14	118.483436	7.526694056	118.067466	118.597963	EC05_nonborder_mitosmooth_threshold_compactness_30_percent_ser_ridge_mean_per_well	nonborder_mitosmooth_threshold_compactness_30_percent_ser_ridge_mean_per_well	EC05	MitoTracker	cell	compactness	EC	EC05	NA	EC05	EC05 cell MitoTracker compactness
1304	1	pheno1	12	54.560707	7.702860973	51.461472	56.170955	EC05_nonborder_mitosmooth_threshold_compactness_30_percent_ser_saddle_mean_per_well	nonborder_mitosmooth_threshold_compactness_30_percent_ser_saddle_mean_per_well	EC05	MitoTracker	cell	compactness	EC	EC05	NA	EC05	EC05 cell MitoTracker compactness
1305	1	pheno1	12	54.796838	7.424223444	53.949981	56.356876	EC05_nonborder_mitosmooth_threshold_compactness_30_percent_ser_spot_mean_per_well	nonborder_mitosmooth_threshold_compactness_30_percent_ser_spot_mean_per_well	EC05	MitoTracker	cell	compactness	EC	EC05	NA	EC05	EC05 cell MitoTracker compactness
1306	1	pheno1	13	5.85598	7.034857244	5.392451	6.46683	EC05_nonborder_mitosmooth_threshold_compactness_30_percent_ser_valley_mean_per_well	nonborder_mitosmooth_threshold_compactness_30_percent_ser_valley_mean_per_well	EC05	MitoTracker	cell	compactness	EC	EC05	NA	EC05	EC05 cell MitoTracker compactness
1307	1	pheno1	12	53.260903	7.654765513	44.930431	54.813604	EC05_nonborder_mitosmooth_threshold_compactness_40_percent_mean_per_well	nonborder_mitosmooth_threshold_compactness_40_percent_mean_per_well	EC05	MitoTracker	cell	compactness	EC	EC05	NA	EC05	EC05 cell MitoTracker compactness
1308	1	pheno1	12	54.046834	7.460737795	50.843726	56.412728	EC05_nonborder_mitosmooth_threshold_compactness_40_percent_ser_bright_mean_per_well	nonborder_mitosmooth_threshold_compactness_40_percent_ser_bright_mean_per_well	EC05	MitoTracker	cell	compactness	EC	EC05	NA	EC05	EC05 cell MitoTracker compactness
1309	1	pheno1	2	69.015889	7.196981651	68.796662	70.258833	EC05_nonborder_mitosmooth_threshold_compactness_40_percent_ser_dark_mean_per_well	nonborder_mitosmooth_threshold_compactness_40_percent_ser_dark_mean_per_well	EC05	MitoTracker	cell	compactness	EC	EC05	NA	EC05	EC05 cell MitoTracker compactness
1310	1	pheno1	13	5.882206	7.043787965	5.481268	8.303673	EC05_nonborder_mitosmooth_threshold_compactness_40_percent_ser_edge_mean_per_well	nonborder_mitosmooth_threshold_compactness_40_percent_ser_edge_mean_per_well	EC05	MitoTracker	cell	compactness	EC	EC05	NA	EC05	EC05 cell MitoTracker compactness
1311	1	pheno1	14	118.336411	6.599216189	84.327646	118.597963	EC05_nonborder_mitosmooth_threshold_compactness_40_percent_ser_hole_mean_per_well	nonborder_mitosmooth_threshold_compactness_40_percent_ser_hole_mean_per_well	EC05	MitoTracker	cell	compactness	EC	EC05	NA	EC05	EC05 cell MitoTracker compactness
1312	1	pheno1	12	54.40644	7.050233256	48.569073	56.030226	EC05_nonborder_mitosmooth_threshold_compactness_40_percent_ser_ridge_mean_per_well	nonborder_mitosmooth_threshold_compactness_40_percent_ser_ridge_mean_per_well	EC05	MitoTracker	cell	compactness	EC	EC05	NA	EC05	EC05 cell MitoTracker compactness
1313	1	pheno1	14	118.336411	6.636325779	118.064862	118.597963	EC05_nonborder_mitosmooth_threshold_compactness_40_percent_ser_saddle_mean_per_well	nonborder_mitosmooth_threshold_compactness_40_percent_ser_saddle_mean_per_well	EC05	MitoTracker	cell	compactness	EC	EC05	NA	EC05	EC05 cell MitoTracker compactness
1314	1	pheno1	12	54.796838	7.659737364	53.949981	56.356876	EC05_nonborder_mitosmooth_threshold_compactness_40_percent_ser_spot_mean_per_well	nonborder_mitosmooth_threshold_compactness_40_percent_ser_spot_mean_per_well	EC05	MitoTracker	cell	compactness	EC	EC05	NA	EC05	EC05 cell MitoTracker compactness
1315	1	pheno1	7	73.239026	7.102831864	70.826755	73.31504	EC05_nonborder_mitosmooth_threshold_compactness_40_percent_ser_valley_mean_per_well	nonborder_mitosmooth_threshold_compactness_40_percent_ser_valley_mean_per_well	EC05	MitoTracker	cell	compactness	EC	EC05	NA	EC05	EC05 cell MitoTracker compactness
1316	1	pheno1	19	45.765842	5.548329641	45.217976	48.140553	EC05_nonborder_mitosmooth_threshold_compactness_50_percent_mean_per_well	nonborder_mitosmooth_threshold_compactness_50_percent_mean_per_well	EC05	MitoTracker	cell	compactness	EC	EC05	NA	EC05	EC05 cell MitoTracker compactness
1317	1	pheno1	12	53.960154	9.480234319	53.150142	56.352582	EC05_nonborder_mitosmooth_threshold_compactness_50_percent_ser_bright_mean_per_well	nonborder_mitosmooth_threshold_compactness_50_percent_ser_bright_mean_per_well	EC05	MitoTracker	cell	compactness	EC	EC05	NA	EC05	EC05 cell MitoTracker compactness
1318	1	pheno1	7	73.239026	7.917957866	70.826755	140.849205	EC05_nonborder_mitosmooth_threshold_compactness_50_percent_ser_dark_mean_per_well	nonborder_mitosmooth_threshold_compactness_50_percent_ser_dark_mean_per_well	EC05	MitoTracker	cell	compactness	EC	EC05	NA	EC05	EC05 cell MitoTracker compactness
1319	1	pheno1	7	73.246837	6.733190199	70.826755	73.317403	EC05_nonborder_mitosmooth_threshold_compactness_50_percent_ser_edge_mean_per_well	nonborder_mitosmooth_threshold_compactness_50_percent_ser_edge_mean_per_well	EC05	MitoTracker	cell	compactness	EC	EC05	NA	EC05	EC05 cell MitoTracker compactness
1320	1	pheno1	14	118.336411	6.91576626	70.383847	118.597963	EC05_nonborder_mitosmooth_threshold_compactness_50_percent_ser_hole_mean_per_well	nonborder_mitosmooth_threshold_compactness_50_percent_ser_hole_mean_per_well	EC05	MitoTracker	cell	compactness	EC	EC05	NA	EC05	EC05 cell MitoTracker compactness
1321	1	pheno1	12	54.796838	6.925398803	48.456402	56.27059	EC05_nonborder_mitosmooth_threshold_compactness_50_percent_ser_ridge_mean_per_well	nonborder_mitosmooth_threshold_compactness_50_percent_ser_ridge_mean_per_well	EC05	MitoTracker	cell	compactness	EC	EC05	NA	EC05	EC05 cell MitoTracker compactness
1322	1	pheno1	14	118.336411	8.093683245	118.064862	118.597963	EC05_nonborder_mitosmooth_threshold_compactness_50_percent_ser_saddle_mean_per_well	nonborder_mitosmooth_threshold_compactness_50_percent_ser_saddle_mean_per_well	EC05	MitoTracker	cell	compactness	EC	EC05	NA	EC05	EC05 cell MitoTracker compactness
1323	1	pheno1	12	53.965525	8.981807699	50.761473	56.170955	EC05_nonborder_mitosmooth_threshold_compactness_50_percent_ser_spot_mean_per_well	nonborder_mitosmooth_threshold_compactness_50_percent_ser_spot_mean_per_well	EC05	MitoTracker	cell	compactness	EC	EC05	NA	EC05	EC05 cell MitoTracker compactness
1324	1	pheno1	6	144.361016	7.375950156	144.179751	144.451132	EC05_nonborder_mitosmooth_threshold_compactness_50_percent_ser_valley_mean_per_well	nonborder_mitosmooth_threshold_compactness_50_percent_ser_valley_mean_per_well	EC05	MitoTracker	cell	compactness	EC	EC05	NA	EC05	EC05 cell MitoTracker compactness
1325	1	pheno1	2	65.049787	5.69659644	64.003318	172.817142	EC05_nonborder_mitosmooth_threshold_compactness_60_percent_mean_per_well	nonborder_mitosmooth_threshold_compactness_60_percent_mean_per_well	EC05	MitoTracker	cell	compactness	EC	EC05	NA	EC05	EC05 cell MitoTracker compactness
1326	1	pheno1	12	53.965525	8.138571288	51.369876	54.796838	EC05_nonborder_mitosmooth_threshold_compactness_60_percent_ser_bright_mean_per_well	nonborder_mitosmooth_threshold_compactness_60_percent_ser_bright_mean_per_well	EC05	MitoTracker	cell	compactness	EC	EC05	NA	EC05	EC05 cell MitoTracker compactness
1327	1	pheno1	6	144.546165	6.582002972	144.285261	145.078823	EC05_nonborder_mitosmooth_threshold_compactness_60_percent_ser_dark_mean_per_well	nonborder_mitosmooth_threshold_compactness_60_percent_ser_dark_mean_per_well	EC05	MitoTracker	cell	compactness	EC	EC05	NA	EC05	EC05 cell MitoTracker compactness
1328	1	pheno1	4	126.043006	6.449948085	125.630641	126.24204	EC05_nonborder_mitosmooth_threshold_compactness_60_percent_ser_edge_mean_per_well	nonborder_mitosmooth_threshold_compactness_60_percent_ser_edge_mean_per_well	EC05	MitoTracker	cell	compactness	EC	EC05	NA	EC05	EC05 cell MitoTracker compactness
1329	1	pheno1	2	69.308964	7.371631728	68.824138	70.370328	EC05_nonborder_mitosmooth_threshold_compactness_60_percent_ser_hole_mean_per_well	nonborder_mitosmooth_threshold_compactness_60_percent_ser_hole_mean_per_well	EC05	MitoTracker	cell	compactness	EC	EC05	NA	EC05	EC05 cell MitoTracker compactness
1330	1	pheno1	12	53.260903	8.251186502	48.456402	54.813604	EC05_nonborder_mitosmooth_threshold_compactness_60_percent_ser_ridge_mean_per_well	nonborder_mitosmooth_threshold_compactness_60_percent_ser_ridge_mean_per_well	EC05	MitoTracker	cell	compactness	EC	EC05	NA	EC05	EC05 cell MitoTracker compactness
1331	1	pheno1	14	84.471526	7.968020084	83.356069	118.597963	EC05_nonborder_mitosmooth_threshold_compactness_60_percent_ser_saddle_mean_per_well	nonborder_mitosmooth_threshold_compactness_60_percent_ser_saddle_mean_per_well	EC05	MitoTracker	cell	compactness	EC	EC05	NA	EC05	EC05 cell MitoTracker compactness
1332	1	pheno1	12	53.325612	7.420816437	42.572199	54.744096	EC05_nonborder_mitosmooth_threshold_compactness_60_percent_ser_spot_mean_per_well	nonborder_mitosmooth_threshold_compactness_60_percent_ser_spot_mean_per_well	EC05	MitoTracker	cell	compactness	EC	EC05	NA	EC05	EC05 cell MitoTracker compactness
1333	1	pheno1	3	100.245245	7.389406128	98.138503	103.44579	EC05_nonborder_mitosmooth_threshold_compactness_60_percent_ser_valley_mean_per_well	nonborder_mitosmooth_threshold_compactness_60_percent_ser_valley_mean_per_well	EC05	MitoTracker	cell	compactness	EC	EC05	NA	EC05	EC05 cell MitoTracker compactness
1334	1	pheno1	12	55.671129	6.154506984	54.379608	57.085956	EC05_nonborder_mitosmooth_width_mm_mean_per_well	nonborder_mitosmooth_width_mm_mean_per_well	EC05	MitoTracker	cell	size	EC	EC05	NA	EC05	EC05 cell MitoTracker size
1335	1	pheno1	7	87.341435	7.089271285	87.226764	87.797868	EC05_nonborder_mitotracker_cell_area_mm2_mean_per_well	nonborder_mitotracker_cell_area_mm2_mean_per_well	EC05	MitoTracker	mitochondria	size	EC	EC05	NA	EC05	EC05 mitochondria MitoTracker size
1336	1	pheno1	14	24.146128	6.470266373	23.926382	118.430217	EC05_nonborder_mitotracker_cell_length_mm_mean_per_well	nonborder_mitotracker_cell_length_mm_mean_per_well	EC05	MitoTracker	mitochondria	size	EC	EC05	NA	EC05	EC05 mitochondria MitoTracker size
1337	1	pheno1	18	39.00532	7.408750793	38.886961	39.597347	EC05_nonborder_mitotracker_cell_ratio_width_to_length_mean_per_well	nonborder_mitotracker_cell_ratio_width_to_length_mean_per_well	EC05	MitoTracker	mitochondria	shape	EC	EC05	NA	EC05	EC05 mitochondria MitoTracker shape
1338	1	pheno1	16	7.189683	5.910630748	4.980989	9.042441	EC05_nonborder_mitotracker_cell_roundness_mean_per_well	nonborder_mitotracker_cell_roundness_mean_per_well	EC05	MitoTracker	mitochondria	shape	EC	EC05	NA	EC05	EC05 mitochondria MitoTracker shape
1339	1	pheno1	15	28.686667	6.11221415	22.55755	30.18151	EC05_nonborder_mitotracker_cell_width_mm_mean_per_well	nonborder_mitotracker_cell_width_mm_mean_per_well	EC05	MitoTracker	mitochondria	size	EC	EC05	NA	EC05	EC05 mitochondria MitoTracker size
1340	1	pheno1	14	23.95488	7.123905802	23.926382	24.590351	EC05_nonborder_nucleus_alexa_488_ser_bright_3_px_mean_per_well	nonborder_nucleus_alexa_488_ser_bright_3_px_mean_per_well	EC05	H2AX	nucleus	texture	EC	EC05	NA	EC05	EC05 nucleus H2AX texture
1341	1	pheno1	2	95.110167	7.375867404	74.703716	97.097345	EC05_nonborder_nucleus_alexa_488_ser_edge_3_px_mean_per_well	nonborder_nucleus_alexa_488_ser_edge_3_px_mean_per_well	EC05	H2AX	nucleus	texture	EC	EC05	NA	EC05	EC05 nucleus H2AX texture
1342	1	pheno1	12	105.853008	6.511592139	105.556671	106.435231	EC05_nonborder_nucleus_alexa_488_ser_ridge_3_px_mean_per_well	nonborder_nucleus_alexa_488_ser_ridge_3_px_mean_per_well	EC05	H2AX	nucleus	texture	EC	EC05	NA	EC05	EC05 nucleus H2AX texture
1343	1	pheno1	X	7.248143	6.654837913	3.859005	7.340308	EC05_nonborder_nucleus_alexa_488_ser_saddle_3_px_mean_per_well	nonborder_nucleus_alexa_488_ser_saddle_3_px_mean_per_well	EC05	H2AX	nucleus	texture	EC	EC05	NA	EC05	EC05 nucleus H2AX texture
1344	1	pheno1	14	24.103292	6.995565763	23.926382	24.854497	EC05_nonborder_nucleus_alexa_488_ser_spot_3_px_mean_per_well	nonborder_nucleus_alexa_488_ser_spot_3_px_mean_per_well	EC05	H2AX	nucleus	texture	EC	EC05	NA	EC05	EC05 nucleus H2AX texture
1345	1	pheno1	3	8.275541	6.126848684	3.039589	12.59997	EC05_nonborder_nucleus_area_mm2_mean_per_well	nonborder_nucleus_area_mm2_mean_per_well	EC05	Hoechst	nucleus	size	EC	EC05	NA	EC05	EC05 nucleus Hoechst size
1346	1	pheno1	X	127.475997	7.254687259	112.492974	128.457888	EC05_nonborder_nucleus_axial_length_ratio_2_mean_per_well	nonborder_nucleus_axial_length_ratio_2_mean_per_well	EC05	Hoechst	nucleus	distribution	EC	EC05	NA	EC05	EC05 nucleus Hoechst distribution
1347	1	pheno1	X	126.47248	6.374364196	124.209589	128.457888	EC05_nonborder_nucleus_axial_length_ratio_mean_per_well	nonborder_nucleus_axial_length_ratio_mean_per_well	EC05	Hoechst	nucleus	distribution	EC	EC05	NA	EC05	EC05 nucleus Hoechst distribution
1348	1	pheno1	11	33.727837	7.659471019	32.829624	34.68175	EC05_nonborder_nucleus_axial_length_ratio_ser_bright_2_mean_per_well	nonborder_nucleus_axial_length_ratio_ser_bright_2_mean_per_well	EC05	Hoechst	nucleus	distribution	EC	EC05	NA	EC05	EC05 nucleus Hoechst distribution
1349	1	pheno1	8	3.480299	6.082085843	3.102168	8.396878	EC05_nonborder_nucleus_axial_length_ratio_ser_bright_mean_per_well	nonborder_nucleus_axial_length_ratio_ser_bright_mean_per_well	EC05	Hoechst	nucleus	distribution	EC	EC05	NA	EC05	EC05 nucleus Hoechst distribution
1350	1	pheno1	2	93.745744	7.259092525	92.914543	96.348544	EC05_nonborder_nucleus_axial_length_ratio_ser_dark_2_mean_per_well	nonborder_nucleus_axial_length_ratio_ser_dark_2_mean_per_well	EC05	Hoechst	nucleus	distribution	EC	EC05	NA	EC05	EC05 nucleus Hoechst distribution
1351	1	pheno1	5	113.382626	7.678272554	112.316747	114.269742	EC05_nonborder_nucleus_axial_length_ratio_ser_dark_mean_per_well	nonborder_nucleus_axial_length_ratio_ser_dark_mean_per_well	EC05	Hoechst	nucleus	distribution	EC	EC05	NA	EC05	EC05 nucleus Hoechst distribution
1352	1	pheno1	6	58.270497	6.487318444	55.852569	60.247377	EC05_nonborder_nucleus_axial_length_ratio_ser_edge_2_mean_per_well	nonborder_nucleus_axial_length_ratio_ser_edge_2_mean_per_well	EC05	Hoechst	nucleus	distribution	EC	EC05	NA	EC05	EC05 nucleus Hoechst distribution
1353	1	pheno1	6	58.47702	7.000047766	55.800003	59.107622	EC05_nonborder_nucleus_axial_length_ratio_ser_edge_mean_per_well	nonborder_nucleus_axial_length_ratio_ser_edge_mean_per_well	EC05	Hoechst	nucleus	distribution	EC	EC05	NA	EC05	EC05 nucleus Hoechst distribution
1354	1	pheno1	5	24.977907	7.106465034	24.926233	25.71946	EC05_nonborder_nucleus_axial_length_ratio_ser_hole_2_mean_per_well	nonborder_nucleus_axial_length_ratio_ser_hole_2_mean_per_well	EC05	Hoechst	nucleus	distribution	EC	EC05	NA	EC05	EC05 nucleus Hoechst distribution
1355	1	pheno1	2	79.591004	6.593391329	29.076993	84.065354	EC05_nonborder_nucleus_axial_length_ratio_ser_hole_mean_per_well	nonborder_nucleus_axial_length_ratio_ser_hole_mean_per_well	EC05	Hoechst	nucleus	distribution	EC	EC05	NA	EC05	EC05 nucleus Hoechst distribution
1356	1	pheno1	2	135.88552	6.301737945	135.333502	141.164537	EC05_nonborder_nucleus_axial_length_ratio_ser_ridge_2_mean_per_well	nonborder_nucleus_axial_length_ratio_ser_ridge_2_mean_per_well	EC05	Hoechst	nucleus	distribution	EC	EC05	NA	EC05	EC05 nucleus Hoechst distribution
1357	1	pheno1	16	76.752087	6.684348003	75.863913	76.932483	EC05_nonborder_nucleus_axial_length_ratio_ser_ridge_mean_per_well	nonborder_nucleus_axial_length_ratio_ser_ridge_mean_per_well	EC05	Hoechst	nucleus	distribution	EC	EC05	NA	EC05	EC05 nucleus Hoechst distribution
1358	1	pheno1	X	127.323725	6.286762223	3.859005	134.120063	EC05_nonborder_nucleus_axial_length_ratio_ser_saddle_2_mean_per_well	nonborder_nucleus_axial_length_ratio_ser_saddle_2_mean_per_well	EC05	Hoechst	nucleus	distribution	EC	EC05	NA	EC05	EC05 nucleus Hoechst distribution
1359	1	pheno1	X	126.974757	6.292751584	111.694041	128.457888	EC05_nonborder_nucleus_axial_length_ratio_ser_saddle_mean_per_well	nonborder_nucleus_axial_length_ratio_ser_saddle_mean_per_well	EC05	Hoechst	nucleus	distribution	EC	EC05	NA	EC05	EC05 nucleus Hoechst distribution
1360	1	pheno1	16	12.04835	6.543395011	5.548501	13.125527	EC05_nonborder_nucleus_axial_length_ratio_ser_spot_2_mean_per_well	nonborder_nucleus_axial_length_ratio_ser_spot_2_mean_per_well	EC05	Hoechst	nucleus	distribution	EC	EC05	NA	EC05	EC05 nucleus Hoechst distribution
1361	1	pheno1	X	142.047901	5.80218123	12.474708	153.68773	EC05_nonborder_nucleus_axial_length_ratio_ser_spot_mean_per_well	nonborder_nucleus_axial_length_ratio_ser_spot_mean_per_well	EC05	Hoechst	nucleus	distribution	EC	EC05	NA	EC05	EC05 nucleus Hoechst distribution
[truncated: 3,739 more rows]
